# Supplementary material for: Legionella pneumophila Infection Rewires the Acanthamoeba castellanii Transcriptome, Highlighting a Class of Sirtuin Genes
Source: Front Cell Infect Microbiol. 2020 Aug 20;10:428. doi: 10.3389/fcimb.2020.00428 (PMC7468528; doi:10.3389/fcimb.2020.00428)
Supplement: Supplementary file 3 [file Table_3.XLSX]

## Sheet: WTvsDotA.24hr.results
	baseMean	log2FoldChange	lfcSE	stat	pvalue	padj
ACA1_000210	474.682	-0.20877	0.204671	-1.02003	0.307715	0.40252
ACA1_000220	109.069	-0.389604	0.204382	-1.90626	0.0566168	0.0935213
ACA1_000330	344.708	0.429119	0.117601	3.64895	0.000263311	0.000733017
ACA1_000530	312.525	-0.546984	0.185816	-2.94369	0.00324323	0.0072409
ACA1_000540	312.325	-0.319819	0.156822	-2.03937	0.0414128	0.0711516
ACA1_000550	1839.42	0.638978	0.291846	2.18944	0.0285652	0.0510417
ACA1_000560	8.36131	0.95818	0.561103	1.70767	0.0876972	0.136887
ACA1_000570	130.502	-0.404993	0.163417	-2.47828	0.0132018	0.0256855
ACA1_000580	316.421	-1.16995	0.206862	-5.65572	1.55195e-08	9.01462e-08
ACA1_000590	267.555	-2.46223	0.376974	-6.53156	6.50869e-11	5.5082e-10
ACA1_000790	185.929	1.66434	0.178546	9.32166	1.14536e-20	3.35572e-19
ACA1_000800	1.81038	1.54045	0.567599	2.71398	0.00664804	0.0138839
ACA1_000810	26.9131	1.4068	0.313489	4.48755	7.20466e-06	2.67571e-05
ACA1_000820	746.246	0.431539	0.131185	3.28954	0.00100351	0.00249673
ACA1_000830	14.2343	0.260611	0.525672	0.495768	0.620058	0.70554
ACA1_000840	992.591	-0.594644	0.0939108	-6.33201	2.4199e-10	1.86327e-09
ACA1_001040	5.39668	0.244899	0.50042	0.489387	0.624568	0.709704
ACA1_001250	192.787	0.546231	0.226725	2.40922	0.0159867	0.0304537
ACA1_001260	236.26	0.607198	0.132348	4.58791	4.47713e-06	1.71793e-05
ACA1_001270	25.7717	2.49713	0.501931	4.97505	6.52323e-07	2.8845e-06
ACA1_001280	57.8928	1.33436	0.226334	5.89553	3.73489e-09	2.41235e-08
ACA1_001290	249.042	0.287327	0.218336	1.31599	0.188179	0.265396
ACA1_001300	181.633	0.151421	0.177124	0.854885	0.392615	0.492818
ACA1_001310	32.2655	-0.361114	0.286375	-1.26098	0.207314	0.288032
ACA1_001510	43.8373	0.220375	0.280198	0.786497	0.431577	0.533262
ACA1_001520	465.003	-0.130721	0.148403	-0.88085	0.378399	0.47845
ACA1_001530	559.875	1.12953	0.127839	8.83559	9.95748e-19	2.29541e-17
ACA1_001540	141.604	1.11866	0.210445	5.3157	1.06248e-07	5.36956e-07
ACA1_001550	8.78529	-0.313624	0.486938	-0.644073	0.519528	0.61928
ACA1_001660	894.437	1.02605	0.332504	3.08583	0.00202986	0.0047396
ACA1_001860	50.3718	-0.795652	0.274928	-2.89404	0.00380324	0.00835835
ACA1_001870	365.637	-0.728053	0.149278	-4.87716	1.07624e-06	4.6085e-06
ACA1_001980	60.8432	-0.456036	0.379806	-1.20071	0.229864	0.314894
ACA1_001990	28.7859	1.24647	0.364828	3.41658	0.000634123	0.00163761
ACA1_002090	1.27712	-0.0106946	0.552645	-0.0193517	0.984561	1
ACA1_002200	51.8478	1.12153	0.24524	4.57319	4.80364e-06	1.83338e-05
ACA1_002300	5711.62	-1.54933	0.203267	-7.62216	2.49464e-14	3.35972e-13
ACA1_002310	0.366621	0.147791	0.376681	0.392352	0.694798	0.772455
ACA1_002320	564.145	0.377073	0.167633	2.2494	0.0244871	0.0445624
ACA1_002330	331.525	-0.0357268	0.136151	-0.262406	0.793009	0.855814
ACA1_002430	383.813	2.11378	0.252923	8.3574	6.41138e-17	1.19855e-15
ACA1_002440	16.5323	1.1003	0.37017	2.97242	0.00295465	0.00666194
ACA1_002450	35.144	1.09647	0.31473	3.48384	0.000494274	0.00130172
ACA1_002460	23.6142	0.810356	0.363796	2.2275	0.0259138	0.0467849
ACA1_002470	18.7867	0.573473	0.342355	1.67508	0.093918	0.1453
ACA1_002480	16.0921	1.42307	0.450315	3.16016	0.00157683	0.00376544
ACA1_002490	334.898	0.285224	0.155878	1.82979	0.0672813	0.108794
ACA1_002500	2532.22	0.119291	0.118978	1.00263	0.316037	0.411856
ACA1_002510	2779.56	0.881797	0.16973	5.19531	2.04383e-07	9.81745e-07
ACA1_002610	502.497	2.14382	0.300931	7.12396	1.04867e-12	1.13966e-11
ACA1_002620	392.14	0.232933	0.100669	2.31386	0.0206755	0.038322
ACA1_002630	82.8779	-2.12365	0.277245	-7.65984	1.86163e-14	2.54367e-13
ACA1_002730	0	NA	NA	NA	NA	NA
ACA1_002740	403.144	-2.78938	0.538334	-5.1815	2.20105e-07	1.05323e-06
ACA1_002750	183.995	-1.01015	0.183043	-5.51862	3.41678e-08	1.88111e-07
ACA1_002760	83.4765	0.864799	0.237397	3.64284	0.00026965	0.000748862
ACA1_002770	495.519	-0.91512	0.218302	-4.192	2.7651e-05	9.29118e-05
ACA1_002780	64.5575	0.181319	0.236418	0.766944	0.443115	0.543986
ACA1_002790	78.6123	-0.18881	0.244849	-0.771125	0.440633	0.541729
ACA1_002890	0.0360616	0	0.164818	0	1	1
ACA1_003000	1.17976	-0.391426	0.507069	-0.771937	0.440152	0.541365
ACA1_003110	258.596	1.18365	0.389981	3.03514	0.00240425	0.00551441
ACA1_003220	129.484	0.87475	0.392535	2.22846	0.0258496	0.0466858
ACA1_003530	5.11122	-0.275614	0.571461	-0.482297	0.629595	0.71412
ACA1_003640	3.96802	0.545297	0.565479	0.96431	0.33489	0.432515
ACA1_003650	459.079	-1.6291	0.200318	-8.13257	4.20277e-16	7.2357e-15
ACA1_003850	26.4101	1.27924	0.346647	3.69032	0.000223972	0.000633677
ACA1_003860	17.4729	1.81884	0.325877	5.58136	2.38644e-08	1.34388e-07
ACA1_003870	80.4446	-2.21496	0.456849	-4.84833	1.24503e-06	5.27565e-06
ACA1_004080	59.1242	-2.61378	0.481391	-5.42963	5.64696e-08	3.00971e-07
ACA1_004190	126.271	-0.420404	0.180198	-2.33301	0.0196477	0.0366337
ACA1_004200	142.603	-0.836528	0.167767	-4.98625	6.15614e-07	2.73343e-06
ACA1_004400	76.0031	0.543283	0.252087	2.15514	0.031151	0.0551991
ACA1_004410	39.1029	-0.693413	0.284991	-2.4331	0.01497	0.0287282
ACA1_004520	10.4719	0.281761	0.448168	0.628693	0.52955	0.628833
ACA1_004630	38.9611	-0.442196	0.323956	-1.36499	0.172257	0.246151
ACA1_004640	5.01327	-0.0218905	0.534734	-0.0409372	0.967346	0.99495
ACA1_004750	1163.73	-1.01229	0.16558	-6.11364	9.73856e-10	6.91406e-09
ACA1_004850	45.2078	-1.13788	0.291912	-3.89802	9.69828e-05	0.000293822
ACA1_004860	85.6644	0.135945	0.259267	0.524343	0.60004	0.68818
ACA1_004870	28.4095	0.799494	0.327549	2.44084	0.0146533	0.0281816
ACA1_004980	4.86602	0.0728163	0.545006	0.133606	0.893714	0.94118
ACA1_004990	128.888	1.61862	0.222566	7.27256	3.52729e-13	4.09068e-12
ACA1_005000	399.671	-0.274148	0.140647	-1.94918	0.0512737	0.0856937
ACA1_005010	21.718	-0.0380994	0.361982	-0.105252	0.916176	0.958262
ACA1_005220	59.6446	-2.4107	0.490894	-4.91082	9.06942e-07	3.92947e-06
ACA1_005320	843.326	0.267254	0.173114	1.54381	0.122635	0.183586
ACA1_005430	0	NA	NA	NA	NA	NA
ACA1_005830	172.874	1.133	0.163853	6.91474	4.68713e-12	4.59541e-11
ACA1_005940	0.0689778	0	0.164818	0	1	1
ACA1_006050	370.972	0.48676	0.164149	2.96536	0.00302332	0.00680553
ACA1_006060	122.09	0.708966	0.267611	2.64924	0.00806724	0.0165147
ACA1_006070	35.7762	-1.69556	0.505528	-3.35403	0.000796427	0.00201826
ACA1_006080	26.8527	-1.37398	0.492473	-2.78995	0.00527154	0.0112433
ACA1_006090	94.3188	-0.274343	0.311585	-0.880475	0.378602	0.478586
ACA1_006100	152.405	-0.182648	0.156797	-1.16487	0.24407	0.33138
ACA1_006110	267.947	0.163344	0.162133	1.00747	0.31371	0.409081
ACA1_006120	608.771	0.282387	0.106943	2.64053	0.00827763	0.0168924
ACA1_006130	1132.7	0.683849	0.150554	4.54221	5.56685e-06	2.1014e-05
ACA1_006140	76.1669	0.99814	0.179933	5.54729	2.9013e-08	1.61446e-07
ACA1_006150	810.174	-0.457218	0.150428	-3.03945	0.00237008	0.00544184
ACA1_006160	0.164302	0.204102	0.167168	1.22094	0.22211	0.305622
ACA1_006170	332.684	0.705393	0.114151	6.17946	6.43231e-10	4.67719e-09
ACA1_006180	23.8433	-0.0749395	0.319352	-0.234661	0.814472	0.874831
ACA1_006190	26.74	-0.54858	0.302671	-1.81246	0.0699149	0.112363
ACA1_006200	55.7106	0.0569151	0.429025	0.132662	0.894461	0.941637
ACA1_006210	601.311	-0.288453	0.263636	-1.09413	0.273896	0.365276
ACA1_006220	11.5316	-0.091209	0.446004	-0.204503	0.837961	0.894118
ACA1_006230	122.808	1.19586	0.170852	6.99935	2.57148e-12	2.63099e-11
ACA1_006240	230.042	0.260149	0.149495	1.74019	0.0818262	0.128726
ACA1_006250	11.2493	-0.264666	0.46345	-0.571077	0.567948	0.660087
ACA1_006260	66.017	0.622445	0.211092	2.94869	0.00319121	0.00713642
ACA1_006270	85.1422	0.303446	0.198867	1.52588	0.127041	0.189427
ACA1_006570	25.6654	0.83598	0.306285	2.72942	0.00634454	0.0133257
ACA1_006580	257.042	0.0156562	0.161049	0.0972141	0.922556	0.962157
ACA1_006680	25.5299	-0.470605	0.363153	-1.29589	0.195015	0.273574
ACA1_006790	15.6695	0.435653	0.403666	1.07924	0.28048	0.372478
ACA1_007000	311.05	-0.068498	0.136078	-0.503373	0.614702	0.700612
ACA1_007010	76.1384	-0.566195	0.225648	-2.50919	0.0121007	0.0237371
ACA1_007310	19.6945	-0.0824361	0.369214	-0.223274	0.823322	0.882194
ACA1_007510	18.3913	0.861563	0.411167	2.09541	0.0361348	0.0631372
ACA1_007620	4.1885	3.18924	0.548059	5.81915	5.91461e-09	3.68866e-08
ACA1_007720	38.6363	-0.736624	0.348799	-2.11189	0.0346962	0.0608358
ACA1_007730	83.7717	-0.532877	0.328316	-1.62306	0.104577	0.15967
ACA1_007740	434.488	-0.0858792	0.126252	-0.680222	0.496364	0.597911
ACA1_007750	691.418	0.371902	0.160391	2.31872	0.02041	0.0379046
ACA1_007760	548.772	0.277072	0.102851	2.69392	0.00706176	0.0146561
ACA1_007770	337.807	1.20246	0.490013	2.45394	0.0141299	0.0272903
ACA1_007780	2666.59	0.0303926	0.135875	0.223681	0.823006	0.881998
ACA1_007790	263.367	-0.113489	0.128008	-0.886579	0.375305	0.475258
ACA1_007800	280.677	-0.481819	0.157404	-3.06104	0.00220569	0.00510495
ACA1_007810	57.8382	-0.608501	0.266457	-2.28367	0.0223908	0.0411109
ACA1_007910	0	NA	NA	NA	NA	NA
ACA1_008410	18.5203	0.452971	0.400888	1.12992	0.25851	0.347724
ACA1_008610	30.3767	0.165857	0.282061	0.588019	0.55652	0.649669
ACA1_008620	18.3727	-3.22592	0.437238	-7.37795	1.60744e-13	1.93434e-12
ACA1_008730	0.262901	0.0666973	0.34558	0.193001	0.846958	0.90167
ACA1_008740	2.55437	-0.133978	0.575749	-0.232702	0.815993	0.87634
ACA1_008840	8.08409	2.9221	0.553543	5.27889	1.29965e-07	6.47584e-07
ACA1_008950	3.74342	-1.1039	0.570301	-1.93564	0.0529121	0.0881184
ACA1_009060	3.02195	0.0215944	0.576306	0.0374705	0.97011	0.997117
ACA1_009160	246.476	0.312125	0.17063	1.82925	0.0673629	0.108902
ACA1_009170	758.123	-1.22122	0.201215	-6.06924	1.28513e-09	8.95897e-09
ACA1_009280	53.1568	-1.70878	0.346471	-4.93194	8.14173e-07	3.56141e-06
ACA1_009480	213.116	0.0200374	0.169684	0.118087	0.905999	0.950786
ACA1_009790	0.0696187	0.101412	0.164818	0.615295	0.53836	0.635379
ACA1_009890	1041.95	0.180309	0.123	1.46592	0.142669	0.209529
ACA1_009900	770.115	1.21653	0.133839	9.08955	9.94497e-20	2.58604e-18
ACA1_009910	761.107	-0.984675	0.15874	-6.20305	5.53778e-10	4.06609e-09
ACA1_009920	152.662	0.108376	0.169475	0.639483	0.522509	0.62234
ACA1_009930	617.302	0.341167	0.322032	1.05942	0.289409	0.382167
ACA1_009940	282.068	0.572518	0.320523	1.7862	0.0740673	0.118152
ACA1_010050	24.8488	-0.229351	0.35399	-0.647904	0.517047	0.616812
ACA1_010150	134.885	-0.0892579	0.169652	-0.526122	0.598803	0.687181
ACA1_010160	325.529	-0.508576	0.143643	-3.54055	0.000399292	0.00107129
ACA1_010170	78.6711	-0.274082	0.205943	-1.33086	0.183235	0.259421
ACA1_010180	361.465	0.911821	0.134926	6.75795	1.39954e-11	1.29606e-10
ACA1_010190	209.351	-1.03727	0.196819	-5.27019	1.3628e-07	6.76673e-07
ACA1_010390	27.1715	-1.37105	0.377545	-3.6315	0.00028178	0.000779381
ACA1_010500	54.8304	-1.19465	0.290984	-4.10556	4.0334e-05	0.00013116
ACA1_010610	60.4395	-0.577845	0.243033	-2.37764	0.0174238	0.0328959
ACA1_010620	0	NA	NA	NA	NA	NA
ACA1_010730	20.0117	-0.0154559	0.358505	-0.043112	0.965612	0.993511
ACA1_010930	294.93	-0.188511	0.13511	-1.39525	0.162942	0.23494
ACA1_010940	66.8579	0.53133	0.237116	2.2408	0.025039	0.0454183
ACA1_011040	175.167	-0.00299621	0.208943	-0.0143399	0.988559	1
ACA1_011150	301.707	0.0902707	0.135022	0.66856	0.503776	0.604676
ACA1_011160	600.388	-1.33699	0.240863	-5.55083	2.84324e-08	1.5845e-07
ACA1_011260	1141.53	0.297186	0.0911401	3.26077	0.00111112	0.00274492
ACA1_011270	150.929	2.34415	0.414235	5.65898	1.52273e-08	8.86389e-08
ACA1_011280	1004.31	0.900226	0.316116	2.84777	0.00440264	0.00955824
ACA1_011380	2.55674	1.39328	0.57223	2.43483	0.0148987	0.0286096
ACA1_011490	211.769	-1.48938	0.197462	-7.54259	4.60721e-14	5.9185e-13
ACA1_011600	30.525	0.303023	0.371383	0.815933	0.414538	0.515344
ACA1_011810	38.4285	0.220846	0.287152	0.76909	0.44184	0.54282
ACA1_011910	71.7487	0.679945	0.230405	2.95109	0.00316659	0.00709087
ACA1_012020	1402.33	0.672214	0.0954819	7.04022	1.91935e-12	2.00333e-11
ACA1_012030	174.079	-0.603309	0.183161	-3.29388	0.00098815	0.00246341
ACA1_012040	580.936	-1.09765	0.155247	-7.07037	1.54516e-12	1.63663e-11
ACA1_012050	76.5283	0.775149	0.177126	4.37626	1.20733e-05	4.32154e-05
ACA1_012250	5.51904	0.355196	0.508559	0.698436	0.484905	0.586663
ACA1_012260	242.263	0.77388	0.14885	5.19908	2.00282e-07	9.65127e-07
ACA1_012270	1085.4	-0.0981292	0.0920801	-1.06569	0.286562	0.378873
ACA1_012280	44.2977	0.187124	0.250239	0.747782	0.454592	0.556076
ACA1_012290	137.897	0.716327	0.293389	2.44156	0.0146241	0.0281326
ACA1_012300	92.2719	0.00509636	0.213926	0.023823	0.980994	1
ACA1_012310	300.258	0.0456246	0.122618	0.372086	0.709829	0.7851
ACA1_012320	19.7424	0.470381	0.340981	1.37949	0.167742	0.240891
ACA1_012330	870.548	0.563811	0.118322	4.76505	1.88807e-06	7.70925e-06
ACA1_012630	121.032	0.371616	0.192096	1.93453	0.0530474	0.0882949
ACA1_012740	395.991	0.709333	0.147595	4.80592	1.54039e-06	6.43827e-06
ACA1_012850	9.00992	-0.252057	0.495444	-0.50875	0.610927	0.69742
ACA1_012960	80.6878	-1.50405	0.251053	-5.99098	2.0858e-09	1.40189e-08
ACA1_012970	285.954	-1.43998	0.206821	-6.96244	3.34419e-12	3.35759e-11
ACA1_012980	325.501	-0.64707	0.204298	-3.16729	0.00153867	0.00368076
ACA1_012990	260.531	-0.491866	0.209432	-2.34856	0.0188459	0.0352877
ACA1_013000	408.26	0.559474	0.166324	3.36377	0.000768857	0.001953
ACA1_013010	15.1367	0.239815	0.393523	0.609405	0.542256	0.638573
ACA1_013120	38.8982	-0.404732	0.261076	-1.55024	0.121083	0.181443
ACA1_013230	42.1193	-0.279821	0.28391	-0.985598	0.324331	0.421284
ACA1_013240	33.8774	-1.03337	0.322607	-3.2032	0.00135912	0.00329316
ACA1_013340	634.86	-0.605485	0.159867	-3.78743	0.000152212	0.000444135
ACA1_013350	167.782	-0.109042	0.513194	-0.212477	0.831735	0.889134
ACA1_013360	169.004	0.165969	0.154961	1.07103	0.284155	0.376187
ACA1_013370	31.1488	0.435831	0.292724	1.48888	0.136519	0.201797
ACA1_013380	380.487	0.233101	0.138933	1.67779	0.0933875	0.144643
ACA1_013390	9356.67	-1.81093	0.119851	-15.1098	1.39468e-51	7.76375e-49
ACA1_013490	147.606	-0.538584	0.190695	-2.82432	0.00473803	0.0102082
ACA1_013500	53.1284	-0.00859512	0.246126	-0.0349216	0.972142	0.998312
ACA1_013610	595.697	0.415323	0.103529	4.01164	6.02974e-05	0.000189438
ACA1_013620	582.766	0.39283	0.12799	3.06922	0.00214615	0.00497862
ACA1_013630	495.123	0.461674	0.126428	3.65167	0.000260538	0.000726376
ACA1_013640	537.132	-1.12492	0.122487	-9.18402	4.15287e-20	1.14528e-18
ACA1_013650	17.4329	0.82367	0.405301	2.03224	0.0421294	0.072193
ACA1_013660	147.939	0.871935	0.160022	5.44886	5.06942e-08	2.72217e-07
ACA1_013670	283.635	-0.505583	0.143333	-3.52734	0.000419763	0.00112221
ACA1_013680	4.45627	1.03834	0.575225	1.8051	0.0710594	0.11402
ACA1_013980	19.7635	0.873021	0.384431	2.27094	0.0231506	0.0423559
ACA1_013990	11.2191	-0.439568	0.4748	-0.925796	0.354552	0.453409
ACA1_014100	2230.16	-0.209897	0.110817	-1.89408	0.0582143	0.0958337
ACA1_014210	819.569	0.973344	0.290604	3.34938	0.000809912	0.00204691
ACA1_014220	334.046	-0.456796	0.293231	-1.5578	0.11928	0.179081
ACA1_014230	0	NA	NA	NA	NA	NA
ACA1_014240	11.7011	0.669761	0.420676	1.59211	0.111361	0.168793
ACA1_014250	207.509	-0.546842	0.216718	-2.52329	0.0116264	0.0229324
ACA1_014350	61.7906	-0.38332	0.24625	-1.55663	0.119559	0.179428
ACA1_014360	1567.65	0.212457	0.0971982	2.18581	0.0288295	0.0514556
ACA1_014370	172.851	-0.677818	0.190182	-3.56405	0.000365182	0.000988953
ACA1_014380	644.576	0.691045	0.164358	4.20451	2.61645e-05	8.83117e-05
ACA1_014390	136.565	-0.0684302	0.164504	-0.415978	0.677426	0.757174
ACA1_014490	653.689	0.651028	0.117339	5.54827	2.88503e-08	1.606e-07
ACA1_014500	0.0641089	0.101412	0.164818	0.615295	0.53836	0.635379
ACA1_014510	383.751	-0.51818	0.188397	-2.75046	0.0059511	0.0125696
ACA1_014520	44.4989	-1.25144	0.368547	-3.3956	0.000684783	0.00175816
ACA1_014620	242.943	-0.142007	0.21558	-0.658722	0.510075	0.61053
ACA1_014630	148.45	0.632873	0.165982	3.81289	0.000137349	0.000404221
ACA1_014740	1406.93	-1.82091	0.191179	-9.52465	1.65597e-21	5.3296e-20
ACA1_014750	30.7969	0.653465	0.296749	2.20208	0.0276598	0.0496332
ACA1_014760	40.0557	0.0169922	0.277388	0.0612578	0.951154	0.982195
ACA1_014870	432.805	1.1689	0.199975	5.84522	5.05888e-09	3.19609e-08
ACA1_014880	21.0384	0.326804	0.365609	0.893862	0.371396	0.47126
ACA1_014980	261.541	-0.403502	0.176565	-2.28528	0.0222961	0.0409671
ACA1_014990	125.06	0.0610352	0.175235	0.348304	0.727612	0.801173
ACA1_015100	18.0847	-0.173694	0.363138	-0.478315	0.632426	0.716521
ACA1_015210	240.328	0.581078	0.133071	4.36668	1.26147e-05	4.49926e-05
ACA1_015310	463.084	0.339077	0.205003	1.65401	0.0981259	0.150986
ACA1_015320	120.36	0.309305	0.299655	1.0322	0.301977	0.396048
ACA1_015330	4185.74	-1.58032	0.536747	-2.94425	0.00323737	0.00722996
ACA1_015340	189.664	0.0810375	0.214445	0.377894	0.705509	0.781588
ACA1_015350	453.805	-1.17915	0.150814	-7.81856	5.3429e-15	7.84984e-14
ACA1_015360	129.885	-0.907507	0.221093	-4.10465	4.04931e-05	0.00013162
ACA1_015370	1.66955	1.77868	0.566171	3.14159	0.0016803	0.00398973
ACA1_015470	255.387	-0.778014	0.257915	-3.01655	0.00255667	0.00583639
ACA1_015480	90.1086	0.358925	0.188187	1.90728	0.0564846	0.0933337
ACA1_015490	152.856	0.109656	0.148605	0.737906	0.460572	0.562156
ACA1_015500	1168.98	-1.11527	0.102503	-10.8803	1.43036e-27	9.14821e-26
ACA1_015510	280.33	-0.439994	0.138552	-3.17566	0.00149497	0.00358649
ACA1_015520	49.9791	-1.11237	0.340383	-3.26799	0.00108315	0.00268201
ACA1_015530	214.307	0.308413	0.221984	1.38935	0.164727	0.237013
ACA1_015540	6.62057	0.329796	0.465648	0.708253	0.478788	0.580712
ACA1_015550	225.974	-1.23595	0.16952	-7.29085	3.08002e-13	3.60255e-12
ACA1_015560	447.771	0.573987	0.106412	5.39403	6.88952e-08	3.62314e-07
ACA1_015570	114.06	-0.110486	0.203227	-0.543657	0.586678	0.676105
ACA1_015580	20.1436	0.0487297	0.370686	0.131458	0.895413	0.942164
ACA1_015590	80.1071	-0.260428	0.219535	-1.18627	0.235515	0.321566
ACA1_015690	15.034	0.0220141	0.414902	0.0530585	0.957685	0.98765
ACA1_015800	87.3874	0.557708	0.198227	2.81349	0.00490076	0.0105181
ACA1_016010	32.4963	0.0113574	0.311929	0.0364102	0.970955	0.99757
ACA1_016020	2.52585	2.3698	0.568004	4.17215	3.01735e-05	0.000100578
ACA1_016030	14.4643	-0.434883	0.469828	-0.925622	0.354643	0.453486
ACA1_016130	38.7763	0.418617	0.312271	1.34056	0.180064	0.255701
ACA1_016140	80.2444	0.752683	0.22094	3.40673	0.000657456	0.00169176
ACA1_016250	722.154	-0.104712	0.100812	-1.03868	0.298954	0.392837
ACA1_016360	52.4383	-2.45885	0.361314	-6.8053	1.00841e-11	9.53231e-11
ACA1_016470	280.18	-0.287075	0.157697	-1.82042	0.0686949	0.11071
ACA1_016480	389.424	0.00184818	0.221441	0.00834613	0.993341	1
ACA1_016580	2.7987	0.483603	0.574735	0.841436	0.400104	0.500424
ACA1_016690	246.025	-0.970532	0.190689	-5.0896	3.58816e-07	1.66041e-06
ACA1_016900	91.0776	2.42807	0.376416	6.45049	1.11491e-10	9.07751e-10
ACA1_017200	82.3756	-1.17762	0.284042	-4.14594	3.38417e-05	0.000111814
ACA1_017310	28.1009	2.17987	0.465211	4.68576	2.78927e-06	1.10702e-05
ACA1_017320	350.331	-0.969138	0.159193	-6.0878	1.1447e-09	8.03589e-09
ACA1_017330	48.5004	-0.118102	0.346274	-0.341064	0.733056	0.80575
ACA1_017430	72.109	-0.520336	0.212198	-2.45212	0.0142016	0.0274005
ACA1_017540	130.733	0.347285	0.190705	1.82106	0.0685983	0.110566
ACA1_017740	3205.38	-0.256854	0.101244	-2.53698	0.0111814	0.0221447
ACA1_017750	0.312081	0.1366	0.173913	0.785447	0.432191	0.533934
ACA1_017760	0.0108952	0	0.164818	0	1	1
ACA1_017770	106.847	-0.932604	0.287324	-3.24583	0.00117109	0.00288123
ACA1_017780	0.306729	0.663924	0.367619	1.80601	0.0709164	0.113827
ACA1_017880	166.634	-1.0878	0.190312	-5.71588	1.09139e-08	6.52098e-08
ACA1_017890	178.199	0.154924	0.155589	0.995728	0.319382	0.415756
ACA1_018000	178.531	1.57584	0.324166	4.86121	1.16669e-06	4.96331e-06
ACA1_018110	97.6897	-0.358351	0.31231	-1.14742	0.251209	0.339447
ACA1_018120	1524.41	-2.01161	0.283587	-7.09345	1.30812e-12	1.40236e-11
ACA1_018130	1.17378	1.99763	0.552152	3.61789	0.000297017	0.000818663
ACA1_018140	785.261	1.14359	0.202877	5.63686	1.73179e-08	9.9727e-08
ACA1_018340	183.481	-0.418426	0.280163	-1.49351	0.135304	0.200159
ACA1_018650	208.918	-1.16454	0.205595	-5.66423	1.47684e-08	8.6168e-08
ACA1_018760	1901.79	0.0607067	0.110839	0.5477	0.583898	0.67378
ACA1_018770	2472.67	0.538584	0.0996059	5.40715	6.40362e-08	3.383e-07
ACA1_018780	2009.97	0.229413	0.135289	1.69572	0.0899381	0.139906
ACA1_018790	147.983	0.179745	0.159345	1.12803	0.259309	0.348606
ACA1_018800	654.062	0.748386	0.101608	7.36541	1.76604e-13	2.11502e-12
ACA1_018810	255.916	-0.0368648	0.179119	-0.205812	0.836938	0.893358
ACA1_018920	110.241	-0.0590355	0.187272	-0.31524	0.752579	0.823233
ACA1_018930	101.041	-0.00136337	0.173293	-0.00786742	0.993723	1
ACA1_018940	118.075	-0.681932	0.413585	-1.64883	0.0991822	0.152393
ACA1_018950	86.2388	-0.7148	0.224269	-3.18724	0.00143637	0.00345805
ACA1_018960	1219.81	1.81411	0.206339	8.79189	1.47063e-18	3.34396e-17
ACA1_018970	216.386	-0.233694	0.322857	-0.72383	0.46917	0.57126
ACA1_018980	241.176	1.35207	0.211701	6.3867	1.69498e-10	1.34153e-09
ACA1_018990	727.003	0.1065	0.0992199	1.07338	0.283103	0.374992
ACA1_019000	231.175	1.43094	0.173302	8.25692	1.49474e-16	2.697e-15
ACA1_019010	375.4	-1.29246	0.233878	-5.52623	3.27183e-08	1.80726e-07
ACA1_019020	31.5946	-0.45412	0.330395	-1.37448	0.169294	0.242542
ACA1_019030	173.722	0.459025	0.14256	3.21988	0.00128243	0.00312601
ACA1_019130	3.82883	-0.711172	0.559985	-1.26998	0.204091	0.28429
ACA1_019140	273.42	-0.271957	0.138792	-1.95946	0.0500589	0.0839538
ACA1_019150	117.913	1.39714	0.414273	3.3725	0.000744891	0.00189854
ACA1_019160	3.07118	3.27186	0.55305	5.91603	3.29814e-09	2.14966e-08
ACA1_019170	0.0118441	0	0.164818	0	1	1
ACA1_019180	13.9005	-0.285507	0.479716	-0.595159	0.551737	0.64554
ACA1_019190	140.353	-0.206301	0.155753	-1.32454	0.185325	0.26206
ACA1_019200	38.0989	-0.319806	0.399264	-0.800989	0.423138	0.524517
ACA1_019210	9.2059	-0.979022	0.490049	-1.9978	0.045738	0.0775281
ACA1_019220	247.26	-0.99339	0.154472	-6.43086	1.26885e-10	1.02642e-09
ACA1_019330	21.6839	-1.31241	0.366193	-3.58393	0.000338462	0.000922076
ACA1_019340	1993.78	-0.152838	0.120018	-1.27346	0.202854	0.282777
ACA1_019350	1077.56	0.611928	0.0928733	6.58884	4.43265e-11	3.83772e-10
ACA1_019360	490.146	-0.149962	0.173636	-0.863661	0.387774	0.488128
ACA1_019370	39.4181	-0.388392	0.306196	-1.26844	0.204641	0.284977
ACA1_019380	314.563	-2.21542	0.463017	-4.78474	1.71209e-06	7.05201e-06
ACA1_019580	4.9915	0.160185	0.539915	0.296686	0.766706	0.834773
ACA1_019590	7.0236	-1.10308	0.537317	-2.05294	0.0400784	0.0691991
ACA1_019600	295.663	0.135223	0.153561	0.880585	0.378543	0.478586
ACA1_019610	680.882	0.240481	0.17247	1.39434	0.163215	0.235267
ACA1_019620	208.067	0.368821	0.181052	2.0371	0.0416395	0.0714758
ACA1_019630	101.863	-0.0095254	0.220967	-0.0431077	0.965616	0.993511
ACA1_019640	316.092	0.453375	0.164357	2.75849	0.00580699	0.0122928
ACA1_019650	51.4907	0.622116	0.232188	2.67937	0.00737611	0.0152431
ACA1_019760	105.473	0.597279	0.349088	1.71097	0.0870872	0.136105
ACA1_019960	647.063	0.173945	0.094933	1.83229	0.066908	0.108237
ACA1_019970	124.896	-0.652776	0.236225	-2.76337	0.00572084	0.012131
ACA1_019980	0.511184	0.71348	0.448493	1.59084	0.111646	0.169192
ACA1_019990	16.7944	-0.924897	0.505985	-1.82791	0.0675626	0.109155
ACA1_020090	66.904	0.304638	0.224163	1.359	0.174146	0.248497
ACA1_020100	147.616	-0.0887468	0.268811	-0.330146	0.74129	0.81278
ACA1_020110	0	NA	NA	NA	NA	NA
ACA1_020120	258.894	-0.0493766	0.175809	-0.280853	0.778823	0.844202
ACA1_020130	162.066	0.292703	0.251143	1.16548	0.243823	0.331105
ACA1_020140	124.191	-0.078477	0.205089	-0.382648	0.701981	0.77854
ACA1_020150	451.856	0.213747	0.126188	1.69387	0.0902896	0.140394
ACA1_020160	3608.84	0.295776	0.125488	2.35701	0.0184225	0.034594
ACA1_020460	0	NA	NA	NA	NA	NA
ACA1_020470	0	NA	NA	NA	NA	NA
ACA1_020480	0.146884	0.0817894	0.166813	0.490305	0.623918	0.709073
ACA1_020490	0	NA	NA	NA	NA	NA
ACA1_020500	0	NA	NA	NA	NA	NA
ACA1_020510	0	NA	NA	NA	NA	NA
ACA1_020520	0.0380791	0	0.164818	0	1	1
ACA1_020530	0	NA	NA	NA	NA	NA
ACA1_020630	0.110496	0.201717	0.164818	1.22388	0.220999	0.304261
ACA1_020640	0	NA	NA	NA	NA	NA
ACA1_020650	0.0283677	0	0.164818	0	1	1
ACA1_020660	0	NA	NA	NA	NA	NA
ACA1_020670	0	NA	NA	NA	NA	NA
ACA1_020770	577.576	-0.560564	0.25121	-2.23146	0.0256509	0.0463938
ACA1_020780	1128.58	0.122418	0.104161	1.17527	0.239887	0.326733
ACA1_020790	12.7258	-0.0940978	0.390862	-0.240744	0.809753	0.870945
ACA1_020800	162.262	-0.555833	0.166783	-3.33267	0.000860177	0.0021634
ACA1_020810	0	NA	NA	NA	NA	NA
ACA1_020820	720.799	0.788949	0.111966	7.04631	1.83721e-12	1.92427e-11
ACA1_020830	900.6	-0.0967633	0.157924	-0.612722	0.54006	0.636536
ACA1_020840	5.80451	4.75888	0.532625	8.93475	4.08098e-19	9.78263e-18
ACA1_020850	380.193	-0.309388	0.210337	-1.47092	0.141314	0.207944
ACA1_020860	1262.6	-0.404213	0.0911572	-4.43424	9.23977e-06	3.36501e-05
ACA1_020870	147.177	-0.1254	0.275344	-0.455429	0.648801	0.73105
ACA1_020880	433.757	-1.67168	0.205282	-8.14334	3.84529e-16	6.63544e-15
ACA1_020890	12.1934	-0.709259	0.408358	-1.73686	0.0824124	0.129485
ACA1_020900	156.231	0.0504532	0.191979	0.262806	0.7927	0.855542
ACA1_020910	891.205	0.235342	0.150448	1.56427	0.117755	0.177233
ACA1_020920	309.969	2.59615	0.372529	6.96899	3.1922e-12	3.21789e-11
ACA1_020930	219.07	0.0627685	0.147935	0.424297	0.671349	0.751873
ACA1_020940	41.7384	2.7377	0.432872	6.32452	2.54029e-10	1.95197e-09
ACA1_020950	423.794	1.09504	0.14152	7.73773	1.01209e-14	1.43507e-13
ACA1_021050	4.10084	0.294553	0.531386	0.554312	0.579366	0.669475
ACA1_021160	7.13603	0.136263	0.486066	0.280338	0.779218	0.84457
ACA1_021170	30.5654	-0.578785	0.299761	-1.93082	0.0535048	0.0889675
ACA1_021280	6.94751	1.38747	0.49783	2.78703	0.00531934	0.0113388
ACA1_021580	873.453	0.643599	0.125568	5.12549	2.96765e-07	1.39387e-06
ACA1_021590	8.76539	0.238024	0.457981	0.519724	0.603256	0.690938
ACA1_021690	486.533	-0.00568326	0.130246	-0.0436347	0.965196	0.99342
ACA1_021700	1915.6	0.357852	0.103713	3.45041	0.00055973	0.00145827
ACA1_021810	526.461	0.40564	0.152309	2.66327	0.00773846	0.0159088
ACA1_021910	0	NA	NA	NA	NA	NA
ACA1_021920	0	NA	NA	NA	NA	NA
ACA1_021930	0.308456	0	0.349374	0	1	1
ACA1_021940	840.505	0.0668654	0.147879	0.452162	0.651152	0.733195
ACA1_022040	128.182	1.05384	0.180883	5.82609	5.67398e-09	3.55304e-08
ACA1_022050	1.54769	0.74417	0.572685	1.29944	0.193792	0.272139
ACA1_022060	2.29301	-1.53033	0.569792	-2.68578	0.00723614	0.0149744
ACA1_022070	0.584153	-0.255959	0.437624	-0.584884	0.558626	0.65147
ACA1_022080	633.727	0.426898	0.116499	3.66438	0.000247935	0.000694717
ACA1_022180	14.5315	-2.75746	0.452967	-6.08755	1.14651e-09	8.04485e-09
ACA1_022190	0.0375657	0.101412	0.164818	0.615295	0.53836	0.635379
ACA1_022200	692.767	-1.27637	0.192724	-6.62277	3.52534e-11	3.08416e-10
ACA1_022210	0.878986	-1.12994	0.507146	-2.22804	0.0258779	0.0467312
ACA1_022220	1100.91	-0.243277	0.120966	-2.01111	0.0443138	0.0754031
ACA1_022330	2080.81	-0.332453	0.112432	-2.95693	0.00310718	0.00697132
ACA1_022340	0.262292	0.221512	0.171481	1.29176	0.196441	0.275164
ACA1_022350	21.3068	3.84206	0.504921	7.60923	2.75734e-14	3.68053e-13
ACA1_022360	922.773	-0.0404447	0.119517	-0.338402	0.73506	0.807245
ACA1_022560	7.77089	0.530565	0.505087	1.05044	0.293514	0.386873
ACA1_022670	10.7352	-1.20308	0.464862	-2.58804	0.00965245	0.0194004
ACA1_022680	0.281088	-0.483811	0.273119	-1.77143	0.0764892	0.121333
ACA1_022690	0.5535	-0.0698526	0.447105	-0.156233	0.875849	0.926586
ACA1_022700	722.77	1.24159	0.175816	7.06184	1.64313e-12	1.72943e-11
ACA1_022710	14170.7	0.362119	0.131629	2.75107	0.00594013	0.0125517
ACA1_022720	58.1191	0.159165	0.241749	0.658392	0.510287	0.610712
ACA1_022730	57.1344	0.0183262	0.229642	0.0798034	0.936394	0.971626
ACA1_022840	76.4335	-0.0790894	0.209842	-0.3769	0.706248	0.782233
ACA1_022850	231.734	-0.122552	0.151561	-0.808601	0.418745	0.519585
ACA1_023050	91.0838	-0.198444	0.234552	-0.846056	0.397521	0.497639
ACA1_023060	55.6393	-0.645347	0.395642	-1.63114	0.102861	0.157402
ACA1_023070	4.01356	-0.48702	0.576024	-0.845484	0.39784	0.497963
ACA1_023080	0	NA	NA	NA	NA	NA
ACA1_023090	173.561	1.04675	0.174665	5.99288	2.06161e-09	1.3864e-08
ACA1_023100	15.2416	3.94028	0.456059	8.63985	5.62889e-18	1.20516e-16
ACA1_023110	688.297	-1.23106	0.21408	-5.75047	8.89939e-09	5.37612e-08
ACA1_023120	7.71862	-0.370618	0.544881	-0.680181	0.49639	0.597911
ACA1_023130	15.3343	-0.0575052	0.473965	-0.121328	0.903431	0.948357
ACA1_023140	0.582101	-0.716894	0.460589	-1.55647	0.119596	0.179465
ACA1_023150	0.192386	0.287322	0.224049	1.28241	0.1997	0.279026
ACA1_023160	0.0670679	0	0.164818	0	1	1
ACA1_023170	0	NA	NA	NA	NA	NA
ACA1_023180	2.40137	-0.0204061	0.575693	-0.0354463	0.971724	0.998113
ACA1_023380	0.00935949	0	0.164818	0	1	1
ACA1_023390	248.645	-0.201008	0.141278	-1.42279	0.154798	0.224902
ACA1_023700	29.0387	0.534057	0.317063	1.68439	0.0921066	0.142865
ACA1_023810	33197.6	-0.902964	0.118085	-7.64674	2.06135e-14	2.80127e-13
ACA1_023820	2995.04	-0.43385	0.139612	-3.10753	0.00188656	0.00443671
ACA1_023830	44.5347	-0.124458	0.338578	-0.367592	0.713178	0.787645
ACA1_023840	2.32214	-0.0422197	0.574797	-0.0734515	0.941447	0.975387
ACA1_023850	398.134	0.515986	0.112649	4.58045	4.63967e-06	1.77576e-05
ACA1_023860	180.035	0.370045	0.15314	2.41639	0.0156752	0.0299172
ACA1_023870	632.271	-0.643004	0.127281	-5.05183	4.37599e-07	1.99186e-06
ACA1_023880	521.011	-0.439955	0.138779	-3.17017	0.00152347	0.00364789
ACA1_023890	692.706	-1.71315	0.182978	-9.36258	7.78128e-21	2.31132e-19
ACA1_023990	507.988	0.15882	0.304176	0.522133	0.601578	0.689418
ACA1_024000	41.3354	0.59664	0.27593	2.16229	0.0305961	0.0543056
ACA1_024010	180.205	-0.00198883	0.145135	-0.0137033	0.989067	1
ACA1_024020	704.584	-0.261198	0.138461	-1.88644	0.0592354	0.0973653
ACA1_024030	7.97729	-0.552438	0.506386	-1.09094	0.275298	0.366982
ACA1_024040	953.922	-0.371814	0.0862397	-4.3114	1.62223e-05	5.67566e-05
ACA1_024050	472.675	-0.666194	0.129085	-5.16089	2.4578e-07	1.1679e-06
ACA1_024150	425.153	-1.34327	0.257524	-5.21608	1.82749e-07	8.87754e-07
ACA1_024160	1253.01	0.770138	0.294441	2.61559	0.00890738	0.0180453
ACA1_024170	6.79477	0.0658701	0.515533	0.127771	0.89833	0.944645
ACA1_024180	353.585	-0.571258	0.258015	-2.21405	0.0268253	0.0483029
ACA1_024190	6.40509	-0.528297	0.552388	-0.956388	0.338876	0.436819
ACA1_024200	311.48	0.896575	0.208804	4.29386	1.75591e-05	6.09642e-05
ACA1_024210	522.402	0.685436	0.274314	2.49873	0.0124639	0.0243701
ACA1_024220	1080.5	-0.523106	0.124459	-4.20302	2.63372e-05	8.88148e-05
ACA1_024230	457.778	0.207658	0.173921	1.19398	0.232485	0.317949
ACA1_024240	771.667	1.08452	0.120698	8.98547	2.57634e-19	6.31688e-18
ACA1_024250	122.227	0.952375	0.246465	3.86413	0.000111484	0.000333987
ACA1_024260	92.184	1.25469	0.192925	6.50349	7.84791e-11	6.5421e-10
ACA1_024360	187.078	0.692253	0.155889	4.44068	8.96737e-06	3.27612e-05
ACA1_024370	0.310322	-0.244053	0.292398	-0.834661	0.403909	0.504424
ACA1_024380	3146.44	-1.68258	0.133741	-12.5809	2.69033e-36	4.59497e-34
ACA1_024390	356.287	-0.144735	0.132415	-1.09304	0.274375	0.365817
ACA1_024400	147.095	-0.366969	0.395587	-0.927656	0.353586	0.452462
ACA1_024410	2423.25	-0.624311	0.116291	-5.36851	7.93916e-08	4.10759e-07
ACA1_024420	149.096	-0.208329	0.189399	-1.09995	0.271354	0.362497
ACA1_024430	76.5054	2.3344	0.38857	6.00767	1.88206e-09	1.27363e-08
ACA1_024630	391.952	0.204147	0.11174	1.82697	0.0677039	0.109331
ACA1_024640	155.09	-0.254549	0.196152	-1.29771	0.194387	0.27282
ACA1_024750	18.9264	-0.39717	0.368201	-1.07868	0.280732	0.372738
ACA1_024960	610.084	-0.46916	0.122701	-3.82359	0.000131521	0.000387982
ACA1_024970	3.82729	-0.136518	0.571505	-0.238875	0.811203	0.871943
ACA1_024980	362.895	-0.163459	0.190621	-0.857507	0.391165	0.491408
ACA1_024990	3.0523	0.563174	0.56433	0.997952	0.318302	0.414458
ACA1_025000	570.692	0.0911248	0.155413	0.586341	0.557647	0.650682
ACA1_025200	72.4107	0.573615	0.267173	2.14698	0.0317945	0.0562533
ACA1_025410	145.334	-0.148444	0.195715	-0.758472	0.448168	0.549337
ACA1_025420	663.978	-1.17281	0.230406	-5.09018	3.57719e-07	1.65584e-06
ACA1_025520	1691.01	-0.531001	0.197457	-2.6892	0.00716227	0.014844
ACA1_025530	42.8076	3.43301	0.516374	6.6483	2.96491e-11	2.63061e-10
ACA1_025540	864.336	0.15811	0.307857	0.513582	0.607544	0.694508
ACA1_025550	41.1375	0.0303581	0.300539	0.101012	0.919541	0.960438
ACA1_025560	125.583	-2.07283	0.524648	-3.95089	7.78611e-05	0.000239806
ACA1_025570	2031.12	-0.00631205	0.168653	-0.0374262	0.970145	0.997117
ACA1_025670	799.816	-0.701074	0.18621	-3.76496	0.000166575	0.000482765
ACA1_025680	557.643	0.51169	0.137255	3.72801	0.000192997	0.000552103
ACA1_025690	7407.17	-1.26083	0.199041	-6.33454	2.3805e-10	1.83482e-09
ACA1_025700	59.9486	0.244508	0.282713	0.864862	0.387115	0.487543
ACA1_025710	113.818	-0.779192	0.184819	-4.21596	2.48715e-05	8.42693e-05
ACA1_025720	163.514	-0.0505526	0.158628	-0.318687	0.749964	0.820614
ACA1_025730	2311.66	0.089921	0.138307	0.650155	0.515592	0.615565
ACA1_025830	6.46606	2.70061	0.557605	4.84323	1.27747e-06	5.40702e-06
ACA1_025840	9.79567	2.38282	0.502334	4.74349	2.10071e-06	8.48297e-06
ACA1_025850	0.156239	-0.113927	0.216834	-0.525408	0.599299	0.687646
ACA1_025860	0	NA	NA	NA	NA	NA
ACA1_025870	0.126118	0.099707	0.165407	0.602799	0.546642	0.64164
ACA1_025880	42.3014	0.730077	0.259164	2.81704	0.00484678	0.0104122
ACA1_025980	344.201	0.458516	0.166543	2.75314	0.00590275	0.012478
ACA1_026390	116.482	-0.212569	0.188149	-1.12979	0.258563	0.347759
ACA1_026500	295.159	0.377394	0.201951	1.86874	0.0616592	0.100806
ACA1_026700	620.8	0.162444	0.114311	1.42107	0.155298	0.225563
ACA1_026710	1213.45	-0.245185	0.0941229	-2.60495	0.00918875	0.0185428
ACA1_026720	1426.3	-1.25514	0.158245	-7.93166	2.16234e-15	3.34706e-14
ACA1_026820	3062.96	0.300717	0.132502	2.26952	0.0232366	0.0424925
ACA1_026830	0.100029	0	0.165062	0	1	1
ACA1_026840	486.941	-0.240788	0.184228	-1.30701	0.191209	0.269064
ACA1_026850	32.7152	-1.73643	0.340563	-5.0987	3.41993e-07	1.58941e-06
ACA1_026860	375.389	0.101538	0.325041	0.312384	0.754749	0.825069
ACA1_026960	1487.55	0.0330739	0.157613	0.209842	0.833791	0.890934
ACA1_026970	24.6755	-0.0877599	0.357327	-0.245601	0.805991	0.86795
ACA1_026980	209.7	-1.13423	0.396368	-2.86155	0.00421568	0.00919219
ACA1_026990	1893.83	-0.0155851	0.475202	-0.0327967	0.973837	0.999529
ACA1_027000	660.156	-0.065237	0.126354	-0.516305	0.605641	0.692894
ACA1_027010	262.609	0.726254	0.145822	4.98042	6.34459e-07	2.80964e-06
ACA1_027020	466.21	0.0926971	0.488114	0.189909	0.849381	0.903801
ACA1_027030	341.823	-0.423018	0.165597	-2.55451	0.0106338	0.0211719
ACA1_027040	257.239	0.00781747	0.128625	0.060777	0.951537	0.982523
ACA1_027050	380.831	0.556534	0.143409	3.88075	0.000104135	0.000313405
ACA1_027150	65.4871	-0.188492	0.250744	-0.75173	0.452213	0.553528
ACA1_027160	784.8	0.537946	0.123769	4.34639	1.38399e-05	4.90137e-05
ACA1_027270	231.343	1.16954	0.166495	7.02448	2.14859e-12	2.22549e-11
ACA1_027280	94.0393	-0.0193812	0.268495	-0.0721845	0.942455	0.976156
ACA1_027390	114.435	-1.55007	0.323871	-4.78606	1.70083e-06	7.01823e-06
ACA1_027490	4157.17	0.216656	0.183779	1.17889	0.23844	0.325028
ACA1_027500	834.343	0.453055	0.151898	2.98262	0.00285793	0.00645936
ACA1_027610	36.8524	-0.0295027	0.318323	-0.0926816	0.926157	0.964867
ACA1_027620	143.199	-2.72196	0.542362	-5.01872	5.20171e-07	2.34639e-06
ACA1_027630	381.957	-0.328782	0.129327	-2.54225	0.011014	0.0218478
ACA1_027730	28.2543	-1.60163	0.338334	-4.73388	2.20266e-06	8.86848e-06
ACA1_027740	466.239	0.478382	0.176463	2.71095	0.00670904	0.0139973
ACA1_027750	785.603	-0.626881	0.113144	-5.54058	3.0148e-08	1.67513e-07
ACA1_027760	1.2006	2.08547	0.540391	3.85919	0.000113766	0.000340143
ACA1_027770	110.034	0.97301	0.274953	3.53883	0.000401909	0.00107773
ACA1_027780	1595.24	-0.135505	0.142764	-0.94916	0.342539	0.440521
ACA1_027790	247.289	-1.36568	0.258047	-5.29238	1.20735e-07	6.04079e-07
ACA1_027800	220.595	-0.149396	0.150092	-0.995363	0.31956	0.415915
ACA1_027810	211.895	-0.060185	0.14805	-0.406519	0.684361	0.763109
ACA1_027820	0.614591	0.0697564	0.484317	0.14403	0.885476	0.9346
ACA1_027830	649.896	-0.972024	0.210671	-4.61395	3.95085e-06	1.53044e-05
ACA1_027840	452.532	1.21884	0.123223	9.89129	4.54119e-23	1.74563e-21
ACA1_027940	512.699	0.408024	0.20916	1.95077	0.0510841	0.0854054
ACA1_028150	269.883	0.203495	0.153704	1.32394	0.185523	0.262216
ACA1_028160	1321.27	-0.800158	0.185071	-4.32351	1.53563e-05	5.38886e-05
ACA1_028170	16.7288	1.88269	0.417084	4.51393	6.36366e-06	2.37925e-05
ACA1_028180	2.74697	0.518795	0.564603	0.918867	0.358165	0.457135
ACA1_028190	99.6778	-2.17097	0.46622	-4.65654	3.21574e-06	1.26459e-05
ACA1_028300	380.217	-0.728906	0.126209	-5.77537	7.67839e-09	4.68559e-08
ACA1_028310	75.3205	-0.544876	0.21657	-2.51594	0.0118716	0.0233578
ACA1_028520	31.5133	-1.04014	0.339822	-3.06083	0.00220725	0.00510777
ACA1_028530	356.859	-0.348337	0.125774	-2.76955	0.0056134	0.0119143
ACA1_028540	1074.98	0.775061	0.105837	7.32313	2.42256e-13	2.86928e-12
ACA1_028550	169.222	-1.01899	0.237643	-4.28791	1.80359e-05	6.25135e-05
ACA1_028650	406.038	0.16776	0.110602	1.51679	0.129321	0.192369
ACA1_028660	249.628	0.0455124	0.261496	0.174046	0.861829	0.914716
ACA1_028670	5385.34	-0.12682	0.117077	-1.08322	0.278711	0.370841
ACA1_028680	358.097	-0.00625009	0.182655	-0.0342179	0.972703	0.998752
ACA1_028690	138.609	0.501589	0.299156	1.67668	0.0936054	0.144921
ACA1_028700	526.652	-0.437358	0.166135	-2.63255	0.00847474	0.0172525
ACA1_028710	0.177245	0	0.167493	0	1	1
ACA1_028720	353.712	0.590297	0.155133	3.8051	0.000141746	0.000415941
ACA1_028730	206.165	-0.520015	0.246492	-2.10966	0.0348876	0.0611428
ACA1_028740	165.528	0.250599	0.144457	1.73477	0.0827821	0.129985
ACA1_028850	12.3557	-0.253353	0.498893	-0.50783	0.611573	0.697892
ACA1_028960	28.4949	-0.0338643	0.295333	-0.114665	0.908711	0.952502
ACA1_029360	1.14091	-0.416169	0.546999	-0.760822	0.446763	0.547927
ACA1_029370	41.2329	0.73763	0.270556	2.72635	0.00640394	0.0134345
ACA1_029380	163.699	-0.359171	0.157554	-2.27966	0.0226276	0.041495
ACA1_029390	283.084	0.180056	0.123483	1.45815	0.144799	0.212263
ACA1_029400	204.103	0.884157	0.140967	6.27206	3.56298e-10	2.68564e-09
ACA1_029410	196.728	0.69585	0.195431	3.5606	0.000370009	0.00100058
ACA1_029510	375.275	-0.121982	0.141639	-0.861212	0.389121	0.489618
ACA1_029520	301.195	-0.832951	0.202281	-4.11779	3.82518e-05	0.000124957
ACA1_029530	218.074	-0.725439	0.163951	-4.42474	9.65594e-06	3.50299e-05
ACA1_029640	98.1842	0.896867	0.263238	3.40706	0.000656664	0.00169001
ACA1_029840	83.8289	0.391011	0.225068	1.7373	0.0823344	0.12939
ACA1_030050	25.3269	-1.19413	0.35254	-3.3872	0.000706092	0.00180886
ACA1_030060	9.43524	-0.805647	0.515334	-1.56335	0.117971	0.177488
ACA1_030070	10.5291	-1.99984	0.457062	-4.37542	1.21196e-05	4.33607e-05
ACA1_030080	107.23	-1.34387	0.234964	-5.71945	1.06869e-08	6.39679e-08
ACA1_030090	966.967	0.27625	0.144597	1.91049	0.0560707	0.0927313
ACA1_030200	0.568276	0.186855	0.387736	0.481915	0.629867	0.714321
ACA1_030210	0.261561	0.347431	0.278482	1.24759	0.212182	0.293682
ACA1_030220	133.12	0.164312	0.188553	0.87144	0.383514	0.483738
ACA1_030720	195.614	-0.916387	0.238357	-3.8446	0.000120749	0.000358597
ACA1_030730	480.563	-0.149651	0.12996	-1.15152	0.249519	0.337558
ACA1_030740	621.863	0.81588	0.102348	7.97162	1.56608e-15	2.48556e-14
ACA1_030750	127.907	0.590842	0.2127	2.77782	0.00547248	0.0116437
ACA1_030760	1018.86	-0.95845	0.124967	-7.6696	1.72538e-14	2.36826e-13
ACA1_030770	22.0769	2.15282	0.329638	6.53084	6.54004e-11	5.5254e-10
ACA1_030780	419.267	-0.0750501	0.339299	-0.221192	0.824943	0.883553
ACA1_030790	86.6185	0.673385	0.261601	2.57409	0.0100504	0.0201115
ACA1_030800	851.975	-1.50729	0.152727	-9.86916	5.66373e-23	2.16055e-21
ACA1_030810	1.6332	-0.213043	0.573047	-0.371772	0.710063	0.785301
ACA1_031010	78.003	0.320057	0.201777	1.58619	0.112695	0.170489
ACA1_031020	2.62631	-0.805753	0.573895	-1.40401	0.160316	0.231732
ACA1_031130	0	NA	NA	NA	NA	NA
ACA1_031140	118.568	1.68846	0.429363	3.93248	8.40732e-05	0.000257461
ACA1_031150	0	NA	NA	NA	NA	NA
ACA1_031160	57.6963	-2.0525	0.305036	-6.72872	1.71161e-11	1.56658e-10
ACA1_031270	433.895	2.37912	0.343523	6.92567	4.33906e-12	4.27647e-11
ACA1_031380	1.63924	-0.538307	0.564427	-0.953723	0.340224	0.438143
ACA1_031390	144.063	0.306346	0.157954	1.93947	0.0524443	0.0874459
ACA1_031400	74.2006	-1.02636	0.291409	-3.52206	0.000428204	0.00114213
ACA1_031410	81.3418	0.615438	0.312709	1.96809	0.0490582	0.0825169
ACA1_031510	88.3775	-0.879455	0.215771	-4.07588	4.58407e-05	0.000147661
ACA1_031520	110.159	0.492378	0.223847	2.19962	0.0278339	0.0498918
ACA1_031530	38.3625	-0.275667	0.448475	-0.614677	0.538768	0.635682
ACA1_031540	959.001	-2.68936	0.479203	-5.61215	1.99831e-08	1.14026e-07
ACA1_031550	351.228	0.0466233	0.227702	0.204756	0.837763	0.893971
ACA1_031560	42.6176	0.0626512	0.311952	0.200836	0.840827	0.896603
ACA1_031570	479.054	-1.73034	0.297064	-5.82482	5.71747e-09	3.57312e-08
ACA1_031580	149.233	0.135676	0.49192	0.27581	0.782694	0.847552
ACA1_031590	254.639	0.0510206	0.525103	0.0971631	0.922597	0.962157
ACA1_031600	537.583	-0.105801	0.114145	-0.926897	0.35398	0.452754
ACA1_031610	345.562	0.501844	0.143176	3.50507	0.000456482	0.00121004
ACA1_031620	549.324	-0.89053	0.102784	-8.66405	4.55287e-18	9.846e-17
ACA1_031630	74.0331	0.623242	0.237804	2.62082	0.00877188	0.017802
ACA1_031640	338.174	0.501182	0.132373	3.78613	0.000153012	0.000446384
ACA1_031650	99.0316	0.667816	0.265785	2.51262	0.0119839	0.0235451
ACA1_031660	3897.59	-0.02838	0.135631	-0.209243	0.834258	0.891307
ACA1_031670	213.282	0.210897	0.196419	1.07371	0.282954	0.374893
ACA1_031680	45.3417	1.34641	0.263843	5.10308	3.34172e-07	1.55643e-06
ACA1_031780	181.806	0.561002	0.353213	1.58828	0.112223	0.169912
ACA1_031790	243.572	-0.207121	0.168428	-1.22973	0.218799	0.301729
ACA1_031800	238.439	1.22682	0.286613	4.28042	1.86545e-05	6.44544e-05
ACA1_031810	0.125245	0	0.165111	0	1	1
ACA1_031820	93.4016	-0.24302	0.201563	-1.20568	0.22794	0.312443
ACA1_031830	61.0325	-0.0433598	0.233913	-0.185368	0.852941	0.907006
ACA1_031840	0.923083	-0.691645	0.51182	-1.35135	0.176585	0.251594
ACA1_031850	1026.28	0.804879	0.125426	6.41718	1.3882e-10	1.11456e-09
ACA1_031860	133.788	-0.550229	0.155022	-3.54936	0.000386162	0.00103922
ACA1_031870	402.417	0.592377	0.23482	2.52268	0.0116465	0.02296
ACA1_031880	6.2644	2.31264	0.555218	4.16528	3.10977e-05	0.00010343
ACA1_031890	5.30844	2.84238	0.568045	5.0038	5.6212e-07	2.51673e-06
ACA1_031900	2650.93	2.99663	0.309143	9.69334	3.21819e-22	1.13277e-20
ACA1_031910	69.4932	-0.127981	0.243973	-0.52457	0.599882	0.688051
ACA1_031920	83.9714	-0.546175	0.258652	-2.11162	0.0347188	0.0608683
ACA1_031930	136.722	-0.556422	0.176828	-3.14668	0.00165134	0.00392654
ACA1_031940	636.383	-0.370351	0.220065	-1.68291	0.0923921	0.143264
ACA1_031950	496.327	-1.42364	0.458252	-3.10668	0.00189199	0.00444878
ACA1_031960	464.627	0.970827	0.142982	6.78987	1.12235e-11	1.05299e-10
ACA1_031970	6.41054	-0.358085	0.524918	-0.682173	0.49513	0.596759
ACA1_031980	246.044	-0.880995	0.222998	-3.95068	7.79299e-05	0.000239919
ACA1_031990	114.218	-0.714119	0.293213	-2.4355	0.0148714	0.0285645
ACA1_032000	2916.69	0.207333	0.0861081	2.40783	0.0160478	0.0305586
ACA1_032200	0.621282	0.699038	0.409728	1.7061	0.0879893	0.137224
ACA1_032210	6.40565	-0.372353	0.52653	-0.707184	0.479452	0.581424
ACA1_032320	51.0244	0.607015	0.248213	2.44554	0.0144636	0.0278586
ACA1_032330	20.9096	0.523415	0.360268	1.45285	0.146266	0.2141
ACA1_032430	574.653	0.794266	0.156067	5.08925	3.59475e-07	1.66243e-06
ACA1_032840	411.428	0.941067	0.184623	5.09723	3.44668e-07	1.60036e-06
ACA1_033140	29.6215	0.173513	0.327351	0.530052	0.596076	0.684678
ACA1_033250	5.57126	-0.63622	0.546724	-1.16369	0.244548	0.331822
ACA1_033360	117.808	0.485004	0.161798	2.99759	0.00272119	0.0061745
ACA1_033370	4.28538	1.59869	0.564386	2.83261	0.00461693	0.00997592
ACA1_033380	109.905	0.182856	0.284601	0.642501	0.520548	0.620299
ACA1_033390	175.434	-0.891079	0.202596	-4.3983	1.091e-05	3.92759e-05
ACA1_033400	281.192	-1.00758	0.183266	-5.49795	3.84241e-08	2.09624e-07
ACA1_033410	87.4746	-1.58271	0.212793	-7.43779	1.02383e-13	1.25617e-12
ACA1_033420	31.039	-0.477863	0.301981	-1.58243	0.113552	0.171595
ACA1_033430	315.974	0.0769841	0.163549	0.470708	0.637849	0.721349
ACA1_033440	49.1179	0.426134	0.234129	1.82008	0.0687463	0.110781
ACA1_033450	336.143	0.549312	0.13673	4.01748	5.88241e-05	0.000185274
ACA1_033460	24.8718	0.839255	0.329378	2.548	0.0108343	0.0215284
ACA1_033470	19.698	0.161521	0.424517	0.380483	0.703587	0.780033
ACA1_033480	288.002	1.15393	0.139041	8.29921	1.0481e-16	1.91874e-15
ACA1_033490	4.6858	0.600455	0.495297	1.21231	0.225393	0.309318
ACA1_033500	592.059	0.619309	0.149035	4.15547	3.24617e-05	0.000107633
ACA1_033510	161.092	0.772556	0.208873	3.6987	0.00021671	0.000614674
ACA1_033520	0.38404	0.0354323	0.349951	0.101249	0.919353	0.960308
ACA1_033530	0	NA	NA	NA	NA	NA
ACA1_033540	497.551	0.485393	0.246887	1.96606	0.049292	0.0828146
ACA1_033550	784.939	-0.596989	0.107139	-5.57208	2.51718e-08	1.41379e-07
ACA1_033560	87.7274	0.699328	0.297873	2.34773	0.018888	0.035362
ACA1_033570	995.45	-0.130134	0.118876	-1.0947	0.273646	0.365008
ACA1_033580	6.80199	0.0216763	0.480211	0.0451391	0.963996	0.99266
ACA1_033590	1328.39	-0.452654	0.188647	-2.39948	0.0164184	0.0311774
ACA1_033600	180.117	-1.2243	0.270962	-4.51833	6.233e-06	2.33388e-05
ACA1_033610	2243.39	0.36905	0.0774412	4.76555	1.88337e-06	7.69215e-06
ACA1_033620	1.02827	-0.05232	0.52079	-0.100463	0.919977	0.960741
ACA1_033630	293.725	0.585323	0.147826	3.95953	7.50968e-05	0.000232053
ACA1_033640	431.815	-0.714187	0.129777	-5.5032	3.72953e-08	2.04058e-07
ACA1_033650	0	NA	NA	NA	NA	NA
ACA1_033660	323.184	-1.22026	0.141771	-8.60725	7.48334e-18	1.57183e-16
ACA1_033670	711.804	0.843884	0.15319	5.50876	3.61376e-08	1.98133e-07
ACA1_033680	0.0647552	0	0.164818	0	1	1
ACA1_033690	2.24619	0.735772	0.527794	1.39405	0.163302	0.235369
ACA1_033700	3.49866	0.667485	0.573788	1.1633	0.244709	0.331977
ACA1_033710	18705	-0.612746	0.169916	-3.60617	0.00031075	0.000854009
ACA1_033720	1152.02	-0.490749	0.109584	-4.47829	7.52421e-06	2.78475e-05
ACA1_033730	482.101	0.279167	0.151486	1.84285	0.0653509	0.10606
ACA1_033740	57.2051	0.249693	0.306292	0.815211	0.414951	0.515815
ACA1_033750	1656.4	-1.3695	0.2693	-5.08543	3.66797e-07	1.69265e-06
ACA1_033760	562.142	0.12193	0.383549	0.3179	0.750561	0.821088
ACA1_033770	553.764	0.585946	0.137166	4.2718	1.93905e-05	6.68746e-05
ACA1_033780	102.181	0.0303162	0.176046	0.172206	0.863276	0.916122
ACA1_033790	0	NA	NA	NA	NA	NA
ACA1_033890	25.4729	0.815197	0.346503	2.35264	0.0186405	0.034951
ACA1_033900	15.0397	0.506098	0.430341	1.17604	0.239578	0.326431
ACA1_033910	78.4265	0.706355	0.262981	2.68595	0.00723233	0.0149686
ACA1_034020	43.8505	-0.143518	0.270171	-0.531212	0.595272	0.68386
ACA1_034030	463.139	0.215914	0.138154	1.56285	0.118089	0.177612
ACA1_034040	102.228	1.12316	0.188826	5.94814	2.71213e-09	1.7863e-08
ACA1_034050	182.918	-0.231297	0.280939	-0.823302	0.410336	0.511135
ACA1_034060	36.2718	-0.148669	0.292626	-0.50805	0.611418	0.697841
ACA1_034070	186.931	0.137532	0.149821	0.917981	0.358629	0.457572
ACA1_034080	867.742	0.972971	0.100059	9.72401	2.38206e-22	8.50413e-21
ACA1_034090	1966.23	0.511105	0.100297	5.09593	3.47036e-07	1.60974e-06
ACA1_034100	7.53434	2.15331	0.531813	4.049	5.14364e-05	0.000163894
ACA1_034110	262.972	0.0191714	0.21272	0.0901249	0.928188	0.96638
ACA1_034120	285.179	-0.312249	0.159575	-1.95675	0.0503772	0.0844244
ACA1_034130	57.1636	-0.834898	0.366739	-2.27655	0.0228133	0.04181
ACA1_034140	16.0133	-0.313272	0.401874	-0.779526	0.43567	0.537127
ACA1_034150	247.023	0.327223	0.133398	2.45299	0.0141674	0.0273451
ACA1_034160	684.544	0.0872323	0.181196	0.481425	0.630214	0.714554
ACA1_034170	3927.21	0.278104	0.102263	2.71951	0.00653793	0.0136825
ACA1_034180	13.6996	0.614941	0.438284	1.40307	0.160597	0.232027
ACA1_034280	1467.36	-0.0820449	0.0834946	-0.982637	0.325786	0.422701
ACA1_034290	201.06	0.208817	0.23034	0.906562	0.364638	0.464018
ACA1_034300	312.525	0.324395	0.144636	2.24284	0.0249069	0.045206
ACA1_034310	1193.55	0.433099	0.162567	2.66413	0.00771879	0.0158705
ACA1_034320	80.9312	1.86891	0.350966	5.32505	1.00925e-07	5.12293e-07
ACA1_034330	44.5723	-0.443807	0.281507	-1.57654	0.114901	0.173373
ACA1_034340	0.740197	0.0277107	0.465517	0.0595266	0.952533	0.983483
ACA1_034350	776.232	0.435869	0.0859746	5.06974	3.98353e-07	1.82538e-06
ACA1_034460	85.9896	-0.170251	0.226781	-0.750729	0.452816	0.55422
ACA1_034470	88.4064	1.40269	0.310292	4.52057	6.16748e-06	2.3128e-05
ACA1_034480	340.534	-0.812103	0.180974	-4.48739	7.21008e-06	2.67706e-05
ACA1_034490	114.035	0.538282	0.194114	2.77302	0.00555395	0.0118004
ACA1_034500	52.7984	0.890887	0.265966	3.34963	0.000809207	0.00204582
ACA1_034510	4784.8	0.459013	0.0756441	6.06806	1.29469e-09	9.02138e-09
ACA1_034520	178.486	0.341175	0.262208	1.30116	0.193203	0.271413
ACA1_034530	139.071	0.124208	0.189936	0.653949	0.513145	0.613308
ACA1_034540	11396.7	-0.679677	0.133661	-5.08506	3.67503e-07	1.69539e-06
ACA1_034550	7728.34	-0.840515	0.124999	-6.7242	1.76558e-11	1.61219e-10
ACA1_034560	393.57	-0.0830568	0.213304	-0.389382	0.696994	0.774151
ACA1_034570	407.804	-0.248386	0.144215	-1.72234	0.0850086	0.133161
ACA1_034580	224.319	0.801726	0.156719	5.11569	3.12589e-07	1.4618e-06
ACA1_034590	423.281	-1.21216	0.342008	-3.54425	0.000393731	0.00105807
ACA1_034600	173.708	1.00895	0.158755	6.35539	2.07901e-10	1.61894e-09
ACA1_034610	2607.94	-1.29405	0.120176	-10.768	4.8771e-27	2.96772e-25
ACA1_034720	336.839	-0.150141	0.136655	-1.09868	0.271906	0.363139
ACA1_034930	5.13864	0.155614	0.546779	0.284601	0.77595	0.841756
ACA1_035040	50.3878	0.575142	0.290535	1.97959	0.0477492	0.0805286
ACA1_035240	56.3655	-0.76718	0.260591	-2.944	0.00324001	0.00723478
ACA1_035250	40.0537	0.87468	0.281999	3.10171	0.00192403	0.00451918
ACA1_035260	1065.49	0.260024	0.0864998	3.00606	0.00264658	0.00602099
ACA1_035270	3.4005	-1.86975	0.559186	-3.34369	0.000826721	0.00208588
ACA1_035280	120.354	-0.371791	0.186601	-1.99244	0.0463225	0.0783687
ACA1_035290	35.6304	-0.488405	0.332656	-1.4682	0.14205	0.20868
ACA1_035300	190.183	-1.98046	0.300092	-6.59949	4.12561e-11	3.58221e-10
ACA1_035310	500.093	0.0999946	0.159578	0.62662	0.530908	0.630246
ACA1_035320	0.324322	0.546629	0.344656	1.58601	0.112736	0.170534
ACA1_035330	152.297	0.17074	0.188046	0.907967	0.363896	0.46323
ACA1_035340	3181.75	0.456107	0.13975	3.26373	0.00109957	0.00271772
ACA1_035350	579.926	0.212905	0.0914991	2.32685	0.0199731	0.0371759
ACA1_035360	9097.3	-2.54045	0.165652	-15.3361	4.3911e-53	2.5384e-50
ACA1_035370	283.464	0.74322	0.144316	5.14995	2.60549e-07	1.23418e-06
ACA1_035380	639.818	0.797191	0.130133	6.12598	9.01244e-10	6.43807e-09
ACA1_035390	186.006	-0.335701	0.184858	-1.816	0.0693711	0.111633
ACA1_035400	211.649	1.22878	0.216426	5.6776	1.36598e-08	8.01352e-08
ACA1_035410	33.2959	0.0805905	0.291627	0.276348	0.782281	0.847217
ACA1_035420	982.387	-0.802876	0.293162	-2.73867	0.00616874	0.0129909
ACA1_035430	85.7112	0.128737	0.255515	0.503833	0.614379	0.700456
ACA1_035440	288.391	0.263647	0.136244	1.93511	0.0529765	0.0881973
ACA1_035450	613.183	-0.0141058	0.198107	-0.0712029	0.943236	0.976681
ACA1_035460	354.558	0.0773207	0.226798	0.340923	0.733161	0.805807
ACA1_035470	1410.07	-0.512257	0.0943753	-5.42787	5.70297e-08	3.03526e-07
ACA1_035480	153.231	-0.202651	0.156917	-1.29146	0.196544	0.275283
ACA1_035490	1105.23	0.175572	0.150855	1.16384	0.244488	0.331822
ACA1_035500	0	NA	NA	NA	NA	NA
ACA1_035510	345.165	-0.373368	0.110901	-3.36668	0.000760792	0.00193481
ACA1_035520	2843	-1.18329	0.161491	-7.32725	2.34915e-13	2.78453e-12
ACA1_035530	460.36	-0.676345	0.11489	-5.88688	3.93548e-09	2.53103e-08
ACA1_035540	0.301556	0	0.366471	0	1	1
ACA1_035550	77.1528	0.466401	0.254622	1.83173	0.066991	0.108359
ACA1_035560	1037.1	0.354795	0.103071	3.44223	0.000576943	0.00149973
ACA1_035570	540.903	0.898498	0.134085	6.70095	2.07062e-11	1.87253e-10
ACA1_035580	110.802	-0.257982	0.218438	-1.18103	0.237591	0.324047
ACA1_035590	676.21	1.22083	0.254	4.80643	1.5365e-06	6.42561e-06
ACA1_035600	35.0599	0.406814	0.293996	1.38374	0.166438	0.23927
ACA1_035610	10.3624	0.418534	0.456147	0.917542	0.358859	0.457795
ACA1_035620	3.2304	-0.121591	0.572315	-0.212456	0.831752	0.889134
ACA1_035630	293.285	0.175586	0.135773	1.29323	0.195931	0.27468
ACA1_035640	595.715	3.94414	0.334343	11.7967	4.06021e-32	4.26748e-30
ACA1_035650	611.721	0.285781	0.0899519	3.17704	0.00148787	0.00357061
ACA1_035660	382.859	0.464551	0.119032	3.90275	9.51077e-05	0.000288548
ACA1_035770	0.199294	0	0.31868	0	1	1
ACA1_035780	2.1338	0.233858	0.574725	0.406904	0.684079	0.762905
ACA1_035790	34.4406	-1.17026	0.325578	-3.5944	0.000325136	0.00088867
ACA1_035890	24.9979	0.265178	0.270255	0.981213	0.326488	0.423392
ACA1_036000	198.13	-1.08597	0.210703	-5.15406	2.5491e-07	1.20861e-06
ACA1_036010	175.485	-0.504761	0.165111	-3.0571	0.00223491	0.00516304
ACA1_036020	194.084	1.31114	0.267653	4.89864	9.65002e-07	4.16183e-06
ACA1_036030	759.337	0.470457	0.181689	2.58935	0.00961572	0.0193318
ACA1_036040	14418.8	-1.26619	0.139224	-9.0946	9.49359e-20	2.47723e-18
ACA1_036050	77.6025	-0.921757	0.226532	-4.06899	4.72172e-05	0.000151867
ACA1_036060	112.479	0.725425	0.190188	3.81424	0.0001366	0.000402253
ACA1_036170	174.237	0.0869207	0.141852	0.612756	0.540038	0.636536
ACA1_036180	103.752	0.355141	0.310183	1.14494	0.252234	0.340587
ACA1_036190	275.066	1.41321	0.164679	8.58163	9.35401e-18	1.93651e-16
ACA1_036200	0	NA	NA	NA	NA	NA
ACA1_036210	74.7187	1.05649	0.201387	5.24606	1.55383e-07	7.64456e-07
ACA1_036220	231.573	-0.440598	0.163827	-2.68941	0.00715783	0.0148389
ACA1_036230	98.0105	-0.0742469	0.189534	-0.391734	0.695255	0.772848
ACA1_036240	904.19	-1.11055	0.257107	-4.31938	1.56465e-05	5.48558e-05
ACA1_036250	323.337	-2.38767	0.24252	-9.84527	7.18459e-23	2.72688e-21
ACA1_036260	2621.89	-1.85705	0.157839	-11.7655	5.87806e-32	6.01001e-30
ACA1_036270	472.786	0.12142	0.156812	0.774303	0.438752	0.540129
ACA1_036280	6155.5	-2.13014	0.201702	-10.5608	4.52586e-26	2.41219e-24
ACA1_036290	106.062	-0.0228315	0.183461	-0.124449	0.90096	0.946701
ACA1_036300	51.76	0.0448836	0.250944	0.178859	0.858048	0.911282
ACA1_036310	114.781	0.972615	0.223736	4.34715	1.37916e-05	4.88654e-05
ACA1_036320	184.326	0.870268	0.238059	3.65569	0.000256496	0.000716568
ACA1_036330	925.892	0.139515	0.096294	1.44885	0.147381	0.215459
ACA1_036340	1423.74	0.151496	0.102867	1.47274	0.140821	0.207381
ACA1_036350	10.5373	1.29089	0.399806	3.22878	0.00124318	0.00304019
ACA1_036360	776.768	-1.3274	0.121252	-10.9474	6.83477e-28	4.50555e-26
ACA1_036370	14.1567	-0.532423	0.457333	-1.16419	0.244346	0.331724
ACA1_036380	1.13778	-0.789113	0.544733	-1.44862	0.147443	0.215528
ACA1_036390	58.9445	-0.321119	0.277552	-1.15697	0.247285	0.334927
ACA1_036400	9134.64	-1.95869	0.182368	-10.7404	6.57923e-27	3.92404e-25
ACA1_036410	0.0211578	0	0.164818	0	1	1
ACA1_036420	7673.28	-1.13868	0.177282	-6.42299	1.33621e-10	1.07397e-09
ACA1_036430	186.118	0.743319	0.174416	4.26175	2.0283e-05	6.96647e-05
ACA1_036440	60.694	0.670544	0.255863	2.62072	0.0087745	0.0178049
ACA1_036450	5.14624	0.140623	0.498818	0.281912	0.778011	0.843687
ACA1_036460	0.0420499	0	0.164818	0	1	1
ACA1_036470	72.1861	0.69228	0.199398	3.47184	0.0005169	0.00135608
ACA1_036480	47.5602	-0.552129	0.290217	-1.90247	0.0571101	0.0942947
ACA1_036490	488.158	0.634322	0.132126	4.80088	1.57968e-06	6.58786e-06
ACA1_036500	105.024	0.529029	0.185853	2.84649	0.00442038	0.00958566
ACA1_036510	119.295	-1.2882	0.269376	-4.78215	1.73426e-06	7.14135e-06
ACA1_036520	841.691	-0.164196	0.0940108	-1.74657	0.0807124	0.127147
ACA1_036530	512.341	-0.352939	0.490515	-0.719528	0.471816	0.573691
ACA1_036540	0	NA	NA	NA	NA	NA
ACA1_036550	0	NA	NA	NA	NA	NA
ACA1_036560	452.029	-0.323645	0.21505	-1.50497	0.132331	0.19628
ACA1_036570	0	NA	NA	NA	NA	NA
ACA1_036580	0	NA	NA	NA	NA	NA
ACA1_036590	0.16804	-0.110651	0.223613	-0.494833	0.620718	0.70597
ACA1_036600	357.486	-0.664211	0.224622	-2.95701	0.00310634	0.00697049
ACA1_036610	109.29	-0.379601	0.173487	-2.18807	0.0286646	0.0512038
ACA1_036620	576.747	-0.649849	0.172066	-3.77674	0.000158897	0.000462205
ACA1_036630	68.0293	-0.326433	0.255505	-1.2776	0.20139	0.281101
ACA1_036640	149.856	0.674176	0.155592	4.33297	1.47111e-05	5.18301e-05
ACA1_036650	132.615	-0.516973	0.18993	-2.72192	0.00649046	0.0135941
ACA1_036660	247.002	-0.0926958	0.134157	-0.690951	0.489596	0.591292
ACA1_036670	257.022	1.03555	0.177034	5.84943	4.93251e-09	3.12281e-08
ACA1_036870	67.104	-0.408933	0.300773	-1.35961	0.173954	0.24827
ACA1_036880	213.606	-0.711775	0.143621	-4.95592	7.19902e-07	3.17027e-06
ACA1_036890	130.394	0.211076	0.161829	1.30431	0.192126	0.270152
ACA1_036900	6866.37	-1.3491	0.104076	-12.9627	1.99197e-38	3.88822e-36
ACA1_036910	202.468	1.14425	0.244951	4.67135	2.99229e-06	1.18353e-05
ACA1_036920	716.374	-1.40198	0.164939	-8.5	1.89588e-17	3.78421e-16
ACA1_036930	275.292	1.83262	0.191436	9.57302	1.03831e-21	3.42983e-20
ACA1_036940	443.022	0.831468	0.233558	3.56001	0.000370844	0.00100266
ACA1_036950	848.082	0.884816	0.260831	3.39229	0.000693114	0.00177773
ACA1_036960	733.766	-0.227453	0.0944935	-2.40708	0.0160806	0.0306015
ACA1_036970	96.6249	-0.275849	0.197443	-1.3971	0.162382	0.2342
ACA1_036980	97.8713	0.479462	0.22703	2.11189	0.0346957	0.0608358
ACA1_036990	2500.11	-0.25542	0.0955812	-2.67228	0.00753372	0.0155282
ACA1_037000	439.099	-0.233877	0.169301	-1.38143	0.167146	0.24015
ACA1_037010	1804.77	-0.746888	0.201443	-3.7077	0.000209153	0.000594698
ACA1_037020	1885.45	-0.840328	0.192607	-4.36293	1.28334e-05	4.57293e-05
ACA1_037030	116.784	0.142635	0.170618	0.835989	0.403161	0.5037
ACA1_037040	2.38321	-0.292924	0.575635	-0.508871	0.610843	0.69742
ACA1_037050	31.8647	-0.0217829	0.338632	-0.0643263	0.94871	0.980412
ACA1_037060	172.625	-0.467437	0.16418	-2.8471	0.0044119	0.00956866
ACA1_037070	503.933	-0.504852	0.166081	-3.03979	0.00236741	0.00543655
ACA1_037080	2210.49	-0.0679673	0.126871	-0.53572	0.592152	0.681161
ACA1_037090	464.286	0.850829	0.148491	5.72982	1.00535e-08	6.04414e-08
ACA1_037100	475.565	0.214577	0.168097	1.27651	0.201776	0.281509
ACA1_037110	1789.52	-0.461	0.256822	-1.79501	0.0726514	0.116251
ACA1_037120	412.93	0.258083	0.133914	1.92723	0.0539506	0.0896591
ACA1_037130	245.123	1.39643	0.16294	8.57018	1.03321e-17	2.12436e-16
ACA1_037140	113.94	1.43742	0.18736	7.67196	1.69382e-14	2.32919e-13
ACA1_037150	155.072	-0.662336	0.209636	-3.15945	0.00158065	0.00377218
ACA1_037160	554.716	0.158404	0.114801	1.37981	0.167644	0.240796
ACA1_037170	145.775	0.25451	0.17496	1.45467	0.14576	0.213504
ACA1_037180	72.6533	0.44081	0.196442	2.24397	0.0248346	0.0450965
ACA1_037190	545.401	-0.289528	0.143315	-2.02022	0.0433601	0.0739981
ACA1_037200	624.455	-0.21762	0.121249	-1.79481	0.0726834	0.11629
ACA1_037210	123.637	-0.744404	0.241803	-3.07856	0.00208003	0.00484395
ACA1_037220	28.0741	-0.779631	0.325802	-2.39296	0.016713	0.031708
ACA1_037430	151.807	-1.29663	0.211292	-6.13667	8.42688e-10	6.02837e-09
ACA1_037440	192.776	-1.30766	0.185289	-7.05742	1.69626e-12	1.78285e-11
ACA1_037450	157.453	-1.75185	0.213635	-8.20023	2.3993e-16	4.24753e-15
ACA1_037460	2248.21	-0.656677	0.117065	-5.60952	2.02892e-08	1.15729e-07
ACA1_037470	247.536	0.0624745	0.131833	0.47389	0.635579	0.719388
ACA1_037480	650.465	-0.939695	0.138062	-6.80631	1.00133e-11	9.47134e-11
ACA1_037490	306.293	0.485103	0.135844	3.57103	0.000355585	0.000964875
ACA1_037500	75.4059	1.45042	0.253182	5.72877	1.0116e-08	6.07929e-08
ACA1_037700	1066.32	0.411007	0.112078	3.66716	0.000245255	0.000687849
ACA1_037710	17.0939	0.413103	0.380041	1.087	0.277038	0.368975
ACA1_037720	118.351	0.165189	0.178556	0.925139	0.354894	0.453641
ACA1_037730	72.5164	-0.566189	0.474288	-1.19377	0.232569	0.318034
ACA1_037740	538.78	-0.0136993	0.195195	-0.0701823	0.944049	0.977207
ACA1_037750	60.6932	-0.644622	0.254587	-2.53203	0.0113406	0.0224216
ACA1_037760	265.376	-0.819274	0.134336	-6.09871	1.06928e-09	7.53456e-09
ACA1_037770	179.738	-1.0848	0.164349	-6.60059	4.09523e-11	3.55788e-10
ACA1_037780	755.65	0.0615953	0.0970146	0.634908	0.525489	0.625096
ACA1_037790	549.844	0.813805	0.162232	5.01631	5.2672e-07	2.37137e-06
ACA1_037800	920.703	0.76041	0.107009	7.10602	1.19434e-12	1.28865e-11
ACA1_037810	30.7157	2.96092	0.506998	5.84011	5.21669e-09	3.28888e-08
ACA1_037820	0.148317	0	0.22388	0	1	1
ACA1_037830	93.9953	0.551709	0.304776	1.81021	0.0702634	0.112839
ACA1_037840	28.6991	-1.29361	0.359472	-3.59863	0.000319899	0.000875949
ACA1_037850	8.48069	1.79427	0.426894	4.20308	2.63308e-05	8.88134e-05
ACA1_037860	485.55	0.923303	0.134365	6.87163	6.34739e-12	6.13908e-11
ACA1_037870	675.327	-0.0453802	0.122656	-0.36998	0.711398	0.786315
ACA1_037880	19.2161	3.47404	0.483339	7.18758	6.59492e-13	7.37512e-12
ACA1_037890	80.4659	-0.0292739	0.287987	-0.10165	0.919035	0.960114
ACA1_037900	264.31	1.37748	0.296111	4.65191	3.28882e-06	1.28997e-05
ACA1_037910	187.009	0.628435	0.1514	4.15082	3.3129e-05	0.000109676
ACA1_037920	275.154	-2.13015	0.361484	-5.89279	3.79718e-09	2.45047e-08
ACA1_037930	899.54	0.521712	0.111536	4.67753	2.90358e-06	1.15026e-05
ACA1_037940	138.243	-0.531374	0.305241	-1.74084	0.0817122	0.128574
ACA1_038050	98.7525	0.445229	0.220562	2.01862	0.0435272	0.0742581
ACA1_038060	139.228	-0.371506	0.296904	-1.25126	0.210838	0.292306
ACA1_038070	88.6342	-0.430337	0.295254	-1.45752	0.144974	0.212498
ACA1_038080	633.587	0.360985	0.129316	2.79151	0.00524634	0.0111959
ACA1_038090	281.554	-0.420623	0.122285	-3.4397	0.000582352	0.00151275
ACA1_038100	818.975	-0.414046	0.159932	-2.58889	0.00962857	0.019355
ACA1_038110	126.447	-0.517245	0.177896	-2.90757	0.0036425	0.00804036
ACA1_038120	73.437	-0.507721	0.209543	-2.42299	0.0153934	0.0294392
ACA1_038130	5529.21	-1.13423	0.109729	-10.3366	4.81345e-25	2.3489e-23
ACA1_038140	144.705	-0.73098	0.273702	-2.67072	0.00756888	0.0155836
ACA1_038150	216.033	-0.444697	0.152781	-2.91069	0.00360635	0.00796758
ACA1_038160	762.247	0.415927	0.140318	2.96418	0.00303494	0.00682963
ACA1_038170	155.187	0.492583	0.299097	1.6469	0.0995785	0.152939
ACA1_038180	800.624	0.0669666	0.113989	0.587483	0.556879	0.649937
ACA1_038190	164.383	0.382663	0.217132	1.76236	0.0780089	0.123444
ACA1_038200	154.567	0.760616	0.194676	3.90708	9.34181e-05	0.000283823
ACA1_038210	253.075	1.21226	0.168232	7.20587	5.76759e-13	6.49827e-12
ACA1_038220	414.583	1.06835	0.192638	5.54586	2.92506e-08	1.62648e-07
ACA1_038230	1383.16	-0.452619	0.0944458	-4.79237	1.64821e-06	6.82818e-06
ACA1_038240	823.224	-1.05735	0.150125	-7.04312	1.87982e-12	1.96343e-11
ACA1_038250	54.3208	0.354486	0.227952	1.55509	0.119924	0.179886
ACA1_038260	171.689	-0.272099	0.183912	-1.47951	0.139005	0.205069
ACA1_038270	276.588	-0.437172	0.2433	-1.79684	0.0723605	0.115848
ACA1_038280	2461.52	0.174003	0.128904	1.34987	0.177059	0.25215
ACA1_038290	0	NA	NA	NA	NA	NA
ACA1_038300	238.715	0.045629	0.155043	0.294299	0.768529	0.835938
ACA1_038310	73.0073	0.0473317	0.229748	0.206016	0.836778	0.893358
ACA1_038320	108.631	-1.04879	0.232741	-4.50627	6.59785e-06	2.46008e-05
ACA1_038330	375.435	-1.50462	0.221691	-6.78702	1.14474e-11	1.07333e-10
ACA1_038340	193.803	-0.129728	0.358381	-0.361984	0.717364	0.791745
ACA1_038350	235.877	0.279359	0.140839	1.98354	0.0473069	0.0798901
ACA1_038360	719.874	-0.847109	0.124098	-6.82611	8.72487e-12	8.29442e-11
ACA1_038370	391.329	0.257748	0.123013	2.09529	0.0361456	0.0631488
ACA1_038380	194.186	0.683724	0.182391	3.74866	0.000177779	0.000511588
ACA1_038390	155.266	0.419849	0.163382	2.56974	0.0101776	0.0203335
ACA1_038400	436.92	0.315558	0.112831	2.79672	0.00516237	0.0110386
ACA1_038410	30.3009	0.355789	0.314843	1.13005	0.258455	0.347706
ACA1_038420	677.308	-0.884081	0.154648	-5.71673	1.08593e-08	6.49227e-08
ACA1_038430	2108.27	-1.44795	0.174066	-8.31843	8.91396e-17	1.64793e-15
ACA1_038440	22.7972	0.41826	0.288048	1.45205	0.146487	0.21434
ACA1_038450	138.71	-0.0632153	0.173767	-0.363793	0.716012	0.790369
ACA1_038460	36261.6	-2.58911	0.161825	-15.9995	1.28809e-57	1.13882e-54
ACA1_038470	193.654	-0.991341	0.162323	-6.10721	1.01388e-09	7.16775e-09
ACA1_038480	259.312	0.486193	0.135867	3.57844	0.000345654	0.000940474
ACA1_038490	1519.99	-0.792935	0.199769	-3.96925	7.20983e-05	0.000223707
ACA1_038500	377.34	0.958936	0.356549	2.68949	0.00715613	0.0148374
ACA1_038510	171.94	0.0121987	0.198211	0.0615442	0.950926	0.982162
ACA1_038520	254.22	0.852706	0.142333	5.99092	2.08651e-09	1.40189e-08
ACA1_038530	143.734	0.461988	0.298406	1.54819	0.121578	0.182112
ACA1_038540	667.229	0.541003	0.129985	4.16203	3.15436e-05	0.000104825
ACA1_038550	995.475	0.287399	0.18458	1.55704	0.119461	0.179317
ACA1_038560	135.557	0.0243344	0.192053	0.126707	0.899172	0.94514
ACA1_038570	123.208	-0.961757	0.27072	-3.55258	0.000381466	0.00102741
ACA1_038580	3.18301	0.291365	0.567205	0.513686	0.607471	0.694477
ACA1_038980	67.7706	0.596228	0.255552	2.33309	0.0196432	0.0366299
ACA1_039190	158.103	0.124622	0.141974	0.87778	0.380063	0.479948
ACA1_039200	737.735	0.407475	0.348387	1.1696	0.242161	0.329323
ACA1_039210	16.2758	0.185566	0.368596	0.50344	0.614655	0.700612
ACA1_039320	166.717	0.989649	0.185267	5.34174	9.20562e-08	4.72059e-07
ACA1_039330	506.763	0.495633	0.163956	3.02297	0.0025031	0.00572367
ACA1_039340	287.675	-0.312648	0.264217	-1.1833	0.236689	0.322963
ACA1_039450	593.95	2.85985	0.308625	9.26641	1.92508e-20	5.51122e-19
ACA1_039460	379.722	-2.16871	0.363971	-5.95846	2.54619e-09	1.68661e-08
ACA1_039470	6.40249	-0.353732	0.528267	-0.669609	0.503107	0.604066
ACA1_039480	0.366721	-0.27201	0.394702	-0.689153	0.490727	0.592325
ACA1_039490	294.039	-0.954175	0.131102	-7.27811	3.38521e-13	3.93805e-12
ACA1_039500	337.411	-1.1511	0.205527	-5.60073	2.1345e-08	1.212e-07
ACA1_039510	243.95	-1.57692	0.275391	-5.72611	1.02762e-08	6.15837e-08
ACA1_039520	87.7326	-0.398153	0.232749	-1.71065	0.0871453	0.136167
ACA1_039620	335.95	0.097265	0.148176	0.656417	0.511556	0.61201
ACA1_039630	491.913	1.0652	0.157956	6.74368	1.54425e-11	1.42568e-10
ACA1_039640	482.241	-0.372279	0.177151	-2.10148	0.0355987	0.0623019
ACA1_039650	13.2059	2.10164	0.478245	4.39447	1.11041e-05	3.99366e-05
ACA1_039660	577.87	-0.327505	0.203427	-1.60994	0.10741	0.163514
ACA1_039770	0.0553287	0	0.164818	0	1	1
ACA1_039970	0.866531	-0.245291	0.442164	-0.554752	0.579064	0.669282
ACA1_039980	125.032	-0.112396	0.159754	-0.703557	0.481708	0.583501
ACA1_040190	312.569	-0.00848056	0.177946	-0.047658	0.961989	0.991
ACA1_040200	111.862	1.20616	0.186642	6.46239	1.0306e-10	8.43216e-10
ACA1_040210	163.042	-0.966203	0.160128	-6.03393	1.6002e-09	1.09972e-08
ACA1_040320	164.647	-0.853304	0.164353	-5.1919	2.08154e-07	9.98583e-07
ACA1_040420	14.2101	-0.812665	0.412008	-1.97245	0.0485583	0.0817464
ACA1_040430	1339.93	-0.496986	0.142714	-3.48239	0.000496967	0.00130813
ACA1_040440	905.597	0.00874987	0.101112	0.0865362	0.93104	0.968143
ACA1_040450	108.828	0.113947	0.3371	0.338022	0.735347	0.807501
ACA1_040460	4010.14	0.846613	0.0848666	9.97581	1.94512e-23	7.90138e-22
ACA1_040470	1426.95	0.0794185	0.0968647	0.819891	0.412278	0.513087
ACA1_040480	494.122	0.261706	0.148252	1.76528	0.0775169	0.122756
ACA1_040490	289.556	-0.20405	0.175018	-1.16588	0.243662	0.330985
ACA1_040500	305.785	0.412833	0.154756	2.66763	0.00763881	0.0157211
ACA1_040510	144.465	1.55885	0.223234	6.98303	2.88883e-12	2.93968e-11
ACA1_040520	1731.8	0.982118	0.132619	7.40557	1.30587e-13	1.57902e-12
ACA1_040530	118.678	1.52287	0.327976	4.64323	3.43005e-06	1.34115e-05
ACA1_040640	116.592	-0.0250182	0.216876	-0.115357	0.908162	0.952192
ACA1_040650	185.126	-0.394995	0.214868	-1.83831	0.0660161	0.107001
ACA1_040660	207.595	0.558448	0.142176	3.92786	8.5705e-05	0.000261925
ACA1_040670	231.723	-0.0823372	0.198023	-0.415796	0.67756	0.757267
ACA1_040680	13.5232	-1.47887	0.400436	-3.69315	0.000221492	0.000627289
ACA1_040690	168.782	0.488545	0.186338	2.62182	0.00874621	0.0177571
ACA1_040700	158.435	0.428332	0.156045	2.74492	0.00605248	0.0127711
ACA1_040710	824.201	-0.477177	0.12572	-3.79554	0.00014732	0.000431203
ACA1_040720	2339.46	0.548637	0.0964719	5.68701	1.29284e-08	7.62911e-08
ACA1_040730	615.587	0.0157952	0.128855	0.122581	0.902439	0.947778
ACA1_040740	71.368	0.365995	0.256864	1.42486	0.154198	0.224138
ACA1_040750	424.49	-0.110879	0.178231	-0.622109	0.53387	0.633113
ACA1_040760	351.084	0.783236	0.130091	6.02067	1.737e-09	1.18292e-08
ACA1_040770	949.819	1.10833	0.227771	4.86596	1.13901e-06	4.85653e-06
ACA1_040780	0.271828	0	0.313482	0	1	1
ACA1_040790	186.165	1.94986	0.229312	8.50308	1.84624e-17	3.69495e-16
ACA1_040800	507.623	-0.0335073	0.12286	-0.272727	0.785063	0.849557
ACA1_040810	2321.87	-0.690361	0.141281	-4.88644	1.02678e-06	4.40676e-06
ACA1_040820	394.96	1.51762	0.137492	11.0379	2.50857e-28	1.74554e-26
ACA1_040830	747.005	0.747355	0.11731	6.37076	1.88099e-10	1.47553e-09
ACA1_040840	1580.9	1.26786	0.138059	9.1834	4.17704e-20	1.14983e-18
ACA1_040850	1004.06	0.369418	0.123475	2.99185	0.00277291	0.00628421
ACA1_040860	262.578	-2.3336	0.371888	-6.27501	3.49618e-10	2.63793e-09
ACA1_040870	207.902	0.843249	0.422636	1.99522	0.0460193	0.0779522
ACA1_040880	365.583	-0.639767	0.1219	-5.2483	1.53512e-07	7.55989e-07
ACA1_040890	43.2435	1.0727	0.3205	3.34697	0.000817014	0.00206347
ACA1_041000	44.7417	1.56202	0.298345	5.23563	1.64427e-07	8.04998e-07
ACA1_041110	9.53036	0.131469	0.466775	0.281654	0.778209	0.84378
ACA1_041220	7.31598	-1.37197	0.497047	-2.76024	0.00577587	0.0122373
ACA1_041430	32.844	-1.10879	0.317537	-3.49185	0.000479694	0.0012671
ACA1_041640	2.01089	0.045193	0.57437	0.0786828	0.937285	0.972282
ACA1_041740	16.5012	0.33036	0.386329	0.855127	0.392481	0.4927
ACA1_041750	243.368	1.21523	0.297737	4.08155	4.47362e-05	0.000144506
ACA1_041760	62.8699	-0.133559	0.324699	-0.411333	0.680828	0.759902
ACA1_041770	138.937	0.0398237	0.251703	0.158217	0.874286	0.925264
ACA1_041780	87.5516	0.151577	0.226079	0.670463	0.502563	0.603557
ACA1_041790	1798.77	-0.959643	0.200326	-4.79041	1.66445e-06	6.88785e-06
ACA1_041900	454.5	1.52489	0.124562	12.242	1.85345e-34	2.58903e-32
ACA1_041910	13.2737	-2.92609	0.503134	-5.81572	6.03718e-09	3.75574e-08
ACA1_041920	529.431	-2.04803	0.34631	-5.91385	3.34199e-09	2.17446e-08
ACA1_041930	181.292	-0.287166	0.181379	-1.58323	0.113368	0.17137
ACA1_041940	453.035	-0.347428	0.17317	-2.00629	0.0448256	0.0761545
ACA1_041950	102.115	0.255575	0.190858	1.33908	0.180544	0.256168
ACA1_041960	324.544	-0.272048	0.125198	-2.17294	0.0297847	0.0530093
ACA1_041970	18.3814	0.981877	0.390255	2.51599	0.0118698	0.0233573
ACA1_041980	27.1081	-1.36964	0.339975	-4.02865	5.6097e-05	0.000177765
ACA1_041990	273.966	0.0110996	0.132225	0.0839451	0.9331	0.969528
ACA1_042000	248.369	0.470822	0.162548	2.89651	0.00377337	0.00829876
ACA1_042010	210.451	0.492618	0.179595	2.74294	0.00608915	0.0128395
ACA1_042020	120.018	-0.455677	0.207977	-2.191	0.0284519	0.0508601
ACA1_042030	168.089	-0.103307	0.193973	-0.532585	0.594321	0.682976
ACA1_042040	147.315	0.245303	0.159611	1.53689	0.124321	0.185852
ACA1_042050	72.3829	-0.487112	0.282867	-1.72205	0.0850603	0.133228
ACA1_042060	767.948	-1.34317	0.260361	-5.15887	2.48439e-07	1.17942e-06
ACA1_042070	322.742	0.141075	0.167454	0.842469	0.399526	0.499823
ACA1_042080	0.0535341	0	0.164818	0	1	1
ACA1_042090	16.3613	0.0679242	0.38978	0.174263	0.861659	0.9146
ACA1_042200	0.0599465	0	0.164818	0	1	1
ACA1_042210	767.075	1.85199	0.269362	6.87546	6.17889e-12	5.98381e-11
ACA1_042220	0.601754	0.508444	0.494881	1.02741	0.304229	0.398585
ACA1_042230	0.428217	-0.164578	0.293849	-0.560078	0.575426	0.665977
ACA1_042240	173.953	0.337641	0.148853	2.26828	0.0233119	0.0426096
ACA1_042250	2937.36	-1.32773	0.132308	-10.0352	1.0678e-23	4.43343e-22
ACA1_042260	0.0392788	0	0.164818	0	1	1
ACA1_042270	453.078	0.223448	0.260995	0.856137	0.391922	0.492195
ACA1_042280	288.981	0.163728	0.131409	1.24594	0.212785	0.294408
ACA1_042290	241.105	-0.193441	0.147436	-1.31203	0.189509	0.266922
ACA1_042300	0.0914625	0.100452	0.165161	0.608207	0.54305	0.639408
ACA1_042310	568.322	0.00908524	0.143932	0.0631217	0.94967	0.981201
ACA1_042320	236.686	0.17978	0.126703	1.4189	0.155927	0.226324
ACA1_042330	85.2766	0.347901	0.234764	1.48192	0.138362	0.20424
ACA1_042340	6.51168	-0.462108	0.562373	-0.821711	0.411241	0.512008
ACA1_042450	49.6087	-0.202663	0.245842	-0.824362	0.409734	0.510427
ACA1_042560	0	NA	NA	NA	NA	NA
ACA1_042670	62.762	0.267251	0.217225	1.23029	0.218587	0.30152
ACA1_042680	292.807	0.808809	0.164684	4.91127	9.04868e-07	3.92275e-06
ACA1_042690	129.328	0.514711	0.184268	2.79327	0.00521787	0.0111446
ACA1_042800	36.2305	-1.38632	0.336243	-4.12295	3.74049e-05	0.000122483
ACA1_042810	1.35277	-0.751456	0.555306	-1.35323	0.175983	0.250879
ACA1_042820	44.0424	0.412336	0.320719	1.28566	0.198561	0.277642
ACA1_042830	11.9061	-0.255969	0.455475	-0.561983	0.574127	0.665059
ACA1_042840	81.944	-0.102051	0.202351	-0.50433	0.61403	0.700271
ACA1_042850	631.207	0.185376	0.145438	1.2746	0.20245	0.282265
ACA1_042860	265.326	0.0740258	0.291906	0.253595	0.799809	0.862224
ACA1_042870	901.873	0.555326	0.0927972	5.9843	2.17321e-09	1.45688e-08
ACA1_042880	0	NA	NA	NA	NA	NA
ACA1_042990	9.01804	0.825703	0.43244	1.9094	0.0562099	0.0929105
ACA1_043100	346.004	0.53778	0.102987	5.22184	1.77159e-07	8.62272e-07
ACA1_043110	44.5967	-1.07578	0.294803	-3.64914	0.000263121	0.000732626
ACA1_043120	357.016	0.548397	0.121521	4.51279	6.39801e-06	2.3909e-05
ACA1_043130	40.397	0.624074	0.26278	2.37489	0.017554	0.0331078
ACA1_043140	238.857	-0.507301	0.184103	-2.75553	0.0058598	0.0123941
ACA1_043150	492.321	-0.334496	0.106142	-3.1514	0.00162489	0.00387284
ACA1_043160	100.775	0.362002	0.201061	1.80046	0.0717885	0.115067
ACA1_043170	179.26	1.49397	0.226749	6.58868	4.43745e-11	3.83966e-10
ACA1_043180	414.304	0.529396	0.181543	2.91609	0.00354444	0.00784232
ACA1_043190	1093.6	-2.58073	0.33041	-7.8107	5.68712e-15	8.32301e-14
ACA1_043200	556.19	-0.0901654	0.158915	-0.567382	0.570455	0.662336
ACA1_043210	0.0118441	0	0.164818	0	1	1
ACA1_043220	277.445	-0.625438	0.17661	-3.54135	0.000398084	0.00106824
ACA1_043230	51.8696	1.11931	0.267938	4.1775	2.94735e-05	9.84851e-05
ACA1_043240	22.5755	1.28692	0.378937	3.39613	0.000683455	0.00175535
ACA1_043250	318.281	3.08277	0.298373	10.3319	5.05354e-25	2.45808e-23
ACA1_043260	699.88	-0.566989	0.211565	-2.67997	0.00736281	0.0152177
ACA1_043270	104.014	1.2776	0.189521	6.74121	1.57075e-11	1.44659e-10
ACA1_043280	222.465	0.766298	0.183891	4.16713	3.08458e-05	0.000102705
ACA1_043290	351.95	-0.936152	0.324561	-2.88436	0.00392208	0.0085969
ACA1_043300	179.264	-0.219664	0.247069	-0.889079	0.373961	0.473715
ACA1_043310	52.7352	1.2136	0.260882	4.6519	3.28887e-06	1.28997e-05
ACA1_043320	59.8023	1.16707	0.410631	2.84213	0.00448126	0.00971349
ACA1_043330	3.30058	0.279303	0.57289	0.487533	0.625881	0.71082
ACA1_043340	168.666	0.0341144	0.150242	0.227062	0.820375	0.880166
ACA1_043350	241.903	-0.331673	0.140277	-2.36442	0.0180586	0.0339785
ACA1_043360	377.716	-0.981882	0.167497	-5.86209	4.57077e-09	2.90726e-08
ACA1_043570	30.5889	-0.592986	0.328679	-1.80415	0.0712083	0.114234
ACA1_043580	229.423	-1.24619	0.194291	-6.41403	1.4172e-10	1.13602e-09
ACA1_043590	48.4823	-0.31195	0.261916	-1.19103	0.233643	0.319363
ACA1_043600	1543.38	-0.599291	0.110193	-5.43857	5.37103e-08	2.87488e-07
ACA1_043610	129.894	0.483832	0.185986	2.60145	0.00928304	0.0187205
ACA1_043620	95.5612	0.40314	0.207402	1.94376	0.0519247	0.0866468
ACA1_043630	198.747	0.801817	0.145733	5.50196	3.75582e-08	2.05273e-07
ACA1_043640	130.185	1.65485	0.29114	5.68404	1.31548e-08	7.75055e-08
ACA1_043650	319.521	2.09857	0.205495	10.2123	1.747e-24	8.0053e-23
ACA1_043660	203.974	0.535664	0.202545	2.64467	0.00817696	0.0167097
ACA1_043670	840.253	0.617051	0.17992	3.42958	0.000604509	0.00156624
ACA1_043770	951.934	-0.502611	0.181616	-2.76743	0.00564997	0.0119857
ACA1_043880	50.6082	-0.66074	0.259921	-2.54208	0.0110194	0.0218557
ACA1_043890	19.9908	1.00517	0.33883	2.96659	0.00301122	0.00677931
ACA1_044000	2.45904	0.235756	0.575447	0.409692	0.682032	0.760964
ACA1_044110	0.350135	-0.236741	0.346068	-0.68409	0.493918	0.595507
ACA1_044120	78.3943	-0.393706	0.220811	-1.783	0.0745863	0.118804
ACA1_044130	91.9506	0.209206	0.193555	1.08086	0.27976	0.371777
ACA1_044240	1.03442	0.078588	0.520293	0.151046	0.87994	0.929997
ACA1_044250	33.2917	-0.496482	0.4073	-1.21896	0.22286	0.306402
ACA1_044260	0	NA	NA	NA	NA	NA
ACA1_044360	421.642	0.678595	0.158259	4.28788	1.80387e-05	6.25135e-05
ACA1_044370	0	NA	NA	NA	NA	NA
ACA1_044380	0.0383185	0	0.164818	0	1	1
ACA1_044390	0	NA	NA	NA	NA	NA
ACA1_044400	0.00859187	0	0.164818	0	1	1
ACA1_044410	103.603	3.7206	0.48187	7.72117	1.15271e-14	1.62373e-13
ACA1_044420	42.5356	1.78396	0.375492	4.75098	2.0243e-06	8.20306e-06
ACA1_044430	0	NA	NA	NA	NA	NA
ACA1_044440	0.02155	0	0.164818	0	1	1
ACA1_044450	0	NA	NA	NA	NA	NA
ACA1_044460	296.484	1.3082	0.142567	9.17605	4.47188e-20	1.22204e-18
ACA1_044470	0.0734215	0	0.164818	0	1	1
ACA1_044480	341.691	-0.0684785	0.132009	-0.51874	0.603942	0.691547
ACA1_044690	128.429	0.729405	0.145352	5.01818	5.21631e-07	2.35156e-06
ACA1_044700	198.67	-1.84372	0.375303	-4.91262	8.98657e-07	3.89694e-06
ACA1_044710	3145.62	-0.774524	0.0765613	-10.1164	4.67338e-24	2.05383e-22
ACA1_044720	69.6046	1.39356	0.215813	6.45726	1.06619e-10	8.70913e-10
ACA1_044730	63.2216	-0.760859	0.341969	-2.22494	0.0260854	0.0470722
ACA1_044740	3.9251	-0.730848	0.520776	-1.40338	0.160503	0.231957
ACA1_044750	414.289	-0.107679	0.126631	-0.850331	0.395141	0.49541
ACA1_044760	204.533	-0.292963	0.142497	-2.05592	0.0397905	0.0687494
ACA1_044770	2813.17	-0.445888	0.111911	-3.98431	6.76762e-05	0.000210682
ACA1_044780	1.02608	0.688415	0.54505	1.26303	0.206578	0.287143
ACA1_044890	284.17	-0.127816	0.177026	-0.722019	0.470283	0.572289
ACA1_044900	113.128	-0.290603	0.226176	-1.28485	0.198844	0.277988
ACA1_044910	483.322	1.04069	0.184582	5.6381	1.71935e-08	9.90489e-08
ACA1_044920	556.903	-0.467586	0.128916	-3.62706	0.000286668	0.000792316
ACA1_044930	292.915	-0.000635767	0.238574	-0.00266486	0.997874	1
ACA1_044940	184.495	0.983075	0.225571	4.35817	1.31156e-05	4.66621e-05
ACA1_045050	22.2592	-0.553657	0.439772	-1.25896	0.208043	0.288965
ACA1_045060	806.585	0.319624	0.130969	2.44045	0.014669	0.0282045
ACA1_045070	188.209	0.786455	0.220004	3.57474	0.000350578	0.00095301
ACA1_045080	318.874	1.23135	0.187415	6.5702	5.02462e-11	4.31051e-10
ACA1_045090	217.786	0.0256225	0.216896	0.118133	0.905962	0.950786
ACA1_045200	468.376	-0.386006	0.132281	-2.91808	0.00352197	0.00779836
ACA1_045210	81.2301	-0.348287	0.202427	-1.72056	0.0853316	0.133611
ACA1_045220	99.131	-0.198266	0.20419	-0.970985	0.331556	0.428986
ACA1_045230	294.461	0.00425098	0.130066	0.0326834	0.973927	0.999529
ACA1_045240	1130.15	-2.42979	0.235731	-10.3074	6.52114e-25	3.11152e-23
ACA1_045250	144.524	-0.817388	0.169594	-4.81969	1.43783e-06	6.04999e-06
ACA1_045260	74.4192	0.462394	0.391568	1.18088	0.237651	0.324099
ACA1_045270	239.823	0.689291	0.154868	4.45083	8.554e-06	3.14267e-05
ACA1_045280	322.35	-0.20562	0.168894	-1.21745	0.223434	0.307022
ACA1_045290	3.12376	-1.13837	0.568324	-2.00303	0.0451741	0.0766847
ACA1_045300	52.9879	0.290511	0.308684	0.941125	0.346641	0.444844
ACA1_045310	3160.77	0.262892	0.100024	2.6283	0.0085814	0.0174437
ACA1_045320	1.0158	0.270045	0.523027	0.516311	0.605637	0.692894
ACA1_045330	1.02308	0.882265	0.538326	1.6389	0.101233	0.155211
ACA1_045340	809.335	-0.142822	0.149351	-0.956281	0.33893	0.436851
ACA1_045350	116.899	0.749449	0.195976	3.82418	0.000131208	0.000387195
ACA1_045360	50.2106	-3.2097	0.357931	-8.96737	3.03666e-19	7.37335e-18
ACA1_045370	601.718	0.260109	0.171812	1.51392	0.130047	0.193353
ACA1_045380	1498.98	-0.658374	0.197255	-3.33767	0.000844834	0.00212803
ACA1_045390	85.2321	0.891011	0.387429	2.29981	0.0214591	0.0396172
ACA1_045400	106.277	0.788322	0.243414	3.23861	0.00120114	0.00294793
ACA1_045410	423.643	-0.83718	0.160275	-5.22339	1.75678e-07	8.55344e-07
ACA1_045420	339.128	-1.38243	0.259488	-5.32753	9.95563e-08	5.06202e-07
ACA1_045430	0.232465	0.0722788	0.287937	0.251023	0.801796	0.864118
ACA1_045440	979.811	1.99642	0.175034	11.4059	3.90632e-30	3.39376e-28
ACA1_045450	115.612	1.97142	0.218334	9.02938	1.72647e-19	4.34653e-18
ACA1_045460	301.497	0.739281	0.175278	4.21777	2.4673e-05	8.37099e-05
ACA1_045470	492.988	-0.734867	0.118371	-6.20817	5.36067e-10	3.93989e-09
ACA1_045480	13.0581	-0.782118	0.460242	-1.69936	0.0892509	0.138981
ACA1_045590	76.7096	-0.559284	0.238623	-2.3438	0.0190883	0.0357058
ACA1_045600	160.108	-1.10767	0.205344	-5.39421	6.88264e-08	3.6208e-07
ACA1_045610	10.8372	-0.36928	0.434244	-0.850399	0.395103	0.495404
ACA1_045620	0.250566	-0.0975308	0.247313	-0.394362	0.693314	0.771089
ACA1_045630	81.7308	-0.264022	0.312555	-0.844722	0.398266	0.498455
ACA1_045640	192.056	-0.759508	0.15501	-4.89975	9.59578e-07	4.14081e-06
ACA1_045650	519.93	1.26376	0.484058	2.61076	0.00903402	0.0182772
ACA1_045660	2.21124	-0.264524	0.564162	-0.468879	0.639156	0.722421
ACA1_045670	75.9357	1.60305	0.276066	5.80678	6.36871e-09	3.94241e-08
ACA1_045680	139.211	1.24808	0.178722	6.98334	2.88235e-12	2.93629e-11
ACA1_045690	175.114	0.239135	0.291261	0.821035	0.411627	0.512445
ACA1_045700	344.538	-0.310342	0.138185	-2.24585	0.0247138	0.0449206
ACA1_045710	147.746	-0.478724	0.15475	-3.09354	0.00197787	0.00462683
ACA1_045720	521.434	-0.749852	0.140681	-5.33018	9.81164e-08	5.00573e-07
ACA1_045920	4.28122	-0.480448	0.553811	-0.86753	0.385652	0.485904
ACA1_045930	67.4035	-0.8366	0.305261	-2.74061	0.00613257	0.0129238
ACA1_045940	0.0341709	0	0.164818	0	1	1
ACA1_045950	164.189	0.412674	0.18236	2.26296	0.023638	0.0431635
ACA1_045960	81.0664	0.682609	0.200471	3.40503	0.000661574	0.00170148
ACA1_045970	143.288	0.403467	0.221197	1.82402	0.0681496	0.109961
ACA1_045980	2.95578	2.36704	0.558235	4.24023	2.23291e-05	7.61703e-05
ACA1_045990	68.1866	-1.13681	0.561369	-2.02506	0.0428611	0.0732798
ACA1_046000	177.15	0.190821	0.266542	0.715913	0.474045	0.575796
ACA1_046010	294.895	-1.47401	0.242464	-6.07931	1.20702e-09	8.43791e-09
ACA1_046020	51.464	0.62986	0.249567	2.52382	0.0116089	0.0229009
ACA1_046030	45.5432	0.780434	0.257594	3.0297	0.00244794	0.00560765
ACA1_046040	48.1785	0.227885	0.259502	0.87816	0.379857	0.479769
ACA1_046050	515.141	-2.4119	0.354777	-6.79836	1.05816e-11	9.96499e-11
ACA1_046060	155.133	1.80769	0.188431	9.59335	8.52682e-22	2.84796e-20
ACA1_046070	92.9321	-0.523735	0.179883	-2.91153	0.00359665	0.00794732
ACA1_046080	100.695	0.560929	0.182484	3.07385	0.00211317	0.00490972
ACA1_046090	1036.56	-1.31736	0.110302	-11.9431	7.05303e-33	8.03084e-31
ACA1_046100	4.07102	0.692955	0.547852	1.26486	0.205922	0.286522
ACA1_046110	0.437177	-0.39676	0.409175	-0.969658	0.332217	0.429636
ACA1_046120	55.4486	0.962543	0.237621	4.05075	5.10538e-05	0.00016283
ACA1_046130	412.845	-0.053177	0.184345	-0.288464	0.772992	0.839213
ACA1_046140	2.17356	1.98825	0.56623	3.51139	0.000445773	0.00118437
ACA1_046150	1410.3	0.396976	0.140584	2.82377	0.0047462	0.0102214
ACA1_046160	144.57	-1.9958	0.251508	-7.93534	2.09924e-15	3.25946e-14
ACA1_046170	73.6834	-0.349402	0.308157	-1.13384	0.25686	0.34587
ACA1_046180	600.343	-0.0812206	0.172856	-0.469875	0.638444	0.721816
ACA1_046390	516.184	1.79182	0.304122	5.89177	3.82082e-09	2.46256e-08
ACA1_046400	37.4867	-0.959299	0.507578	-1.88995	0.058764	0.0966645
ACA1_046410	374.563	0.665771	0.157443	4.22866	2.35089e-05	8.00133e-05
ACA1_046420	793.064	0.0762664	0.102936	0.740913	0.458746	0.560247
ACA1_046430	398.216	-0.596094	0.16507	-3.61115	0.000304838	0.000838836
ACA1_046440	78.052	-2.6009	0.397591	-6.54164	6.0849e-11	5.17285e-10
ACA1_046450	43.0906	0.400882	0.284896	1.40712	0.159392	0.230692
ACA1_046460	216.748	0.191862	0.31435	0.610347	0.541632	0.637988
ACA1_046470	1890.45	-2.00355	0.216352	-9.26059	2.03307e-20	5.79829e-19
ACA1_046480	151.643	-0.512117	0.182984	-2.7987	0.00513092	0.010976
ACA1_046490	1198.24	-1.22989	0.239746	-5.13	2.89743e-07	1.36601e-06
ACA1_046500	88.5662	-1.88711	0.335445	-5.62571	1.84745e-08	1.05901e-07
ACA1_046510	143.3	-0.05196	0.163414	-0.317966	0.750511	0.821088
ACA1_046520	70.4454	1.07379	0.225266	4.76677	1.87201e-06	7.65198e-06
ACA1_046530	119.127	-1.95985	0.23309	-8.40813	4.16589e-17	7.98639e-16
ACA1_046540	93.7903	-0.343025	0.185945	-1.84476	0.0650719	0.105676
ACA1_046550	503.149	0.882523	0.19476	4.53133	5.86126e-06	2.20347e-05
ACA1_046560	177.883	-1.05001	0.205805	-5.10198	3.36125e-07	1.56359e-06
ACA1_046570	245.017	0.249234	0.133425	1.86796	0.0617671	0.100931
ACA1_046580	305.751	0.448818	0.160909	2.78926	0.00528285	0.0112642
ACA1_046590	467.676	-0.69683	0.248311	-2.80627	0.00501182	0.0107396
ACA1_046600	89.8151	-0.203901	0.206969	-0.985176	0.324538	0.421475
ACA1_046610	3.05599	3.3975	0.538779	6.30592	2.86483e-10	2.1935e-09
ACA1_046620	6.52163	-1.45214	0.549805	-2.6412	0.00826137	0.0168661
ACA1_046630	41.4771	-0.287717	0.27077	-1.06259	0.28797	0.3806
ACA1_046640	130.989	-0.37314	0.186553	-2.00018	0.0454811	0.0771362
ACA1_046650	7.79201	0.201028	0.507532	0.39609	0.692038	0.770081
ACA1_046660	582.467	-1.04574	0.114382	-9.14253	6.10065e-20	1.6403e-18
ACA1_046670	7.92125	3.40446	0.568329	5.9903	2.09459e-09	1.40669e-08
ACA1_046680	466.946	-0.305911	0.118071	-2.5909	0.00957243	0.0192525
ACA1_046690	52.6223	1.28796	0.26143	4.92661	8.36699e-07	3.64933e-06
ACA1_046700	612.049	0.575526	0.210032	2.74019	0.00614041	0.0129385
ACA1_046710	6.99545	1.86831	0.56938	3.2813	0.0010333	0.00256576
ACA1_046720	20.7746	-1.48306	0.53734	-2.76001	0.00577997	0.0122442
ACA1_046730	267.718	0.9671	0.173688	5.56803	2.57643e-08	1.44491e-07
ACA1_046740	249.945	-0.33315	0.191438	-1.74025	0.0818151	0.128722
ACA1_046850	33.2654	-1.36321	0.339033	-4.02087	5.79839e-05	0.000182979
ACA1_046860	0.303782	0.032233	0.304439	0.105876	0.91568	0.958003
ACA1_046870	320.291	1.20964	0.279742	4.32412	1.53141e-05	5.37866e-05
ACA1_046970	400.202	1.27272	0.197977	6.42862	1.28765e-10	1.03994e-09
ACA1_047280	346.994	0.852761	0.151296	5.63639	1.73649e-08	9.9942e-08
ACA1_047290	538.467	1.20224	0.181679	6.6174	3.65576e-11	3.19083e-10
ACA1_047400	49.5909	1.50538	0.26174	5.75143	8.849e-09	5.35213e-08
ACA1_047410	28.2031	1.72823	0.355381	4.86303	1.156e-06	4.92339e-06
ACA1_047520	0.415443	-0.817277	0.411091	-1.98807	0.0468039	0.0791118
ACA1_047630	304.176	0.804613	0.14762	5.45057	5.02096e-08	2.69904e-07
ACA1_047640	186.832	0.925575	0.17275	5.3579	8.41929e-08	4.34553e-07
ACA1_047650	70.5038	0.0229425	0.240288	0.0954791	0.923934	0.963219
ACA1_047660	0	NA	NA	NA	NA	NA
ACA1_047670	0	NA	NA	NA	NA	NA
ACA1_047680	0.26394	0.341617	0.239927	1.42384	0.154493	0.224503
ACA1_047790	0.0274538	0	0.164818	0	1	1
ACA1_047800	0.20695	0	0.168148	0	1	1
ACA1_047810	0.071807	-0.0991983	0.164818	-0.601866	0.547263	0.64164
ACA1_047820	6.46579	0.970713	0.483837	2.00628	0.0448263	0.0761545
ACA1_047930	276.031	1.07231	0.197252	5.43623	5.44208e-08	2.90877e-07
ACA1_048030	80.2187	-1.20106	0.273147	-4.3971	1.09707e-05	3.94756e-05
ACA1_048040	163.099	0.0329533	0.203342	0.162058	0.87126	0.922543
ACA1_048050	2509.43	-0.960309	0.123087	-7.80188	6.09899e-15	8.89979e-14
ACA1_048060	567.313	1.17315	0.143079	8.19931	2.41776e-16	4.27517e-15
ACA1_048070	38.3187	0.67756	0.383855	1.76515	0.0775392	0.122779
ACA1_048080	883.329	-0.234807	0.252022	-0.93169	0.351497	0.450099
ACA1_048090	189.704	0.628044	0.138488	4.53501	5.7601e-06	2.16815e-05
ACA1_048100	1.30769	2.8153	0.483655	5.82087	5.85409e-09	3.65243e-08
ACA1_048110	5186.98	-1.46998	0.0934118	-15.7365	8.49813e-56	5.55335e-53
ACA1_048120	463.449	0.270494	0.147884	1.82909	0.0673865	0.108929
ACA1_048130	323.414	0.887903	0.162021	5.48019	4.24878e-08	2.30539e-07
ACA1_048140	275.099	0.548559	0.189088	2.90108	0.00371879	0.00818712
ACA1_048150	598.779	-0.0491203	0.131604	-0.373245	0.708966	0.784377
ACA1_048160	191.022	1.44955	0.174094	8.32623	8.34552e-17	1.55047e-15
ACA1_048170	1300.98	-1.52518	0.250845	-6.08018	1.20047e-09	8.39606e-09
ACA1_048180	32.1838	-0.253759	0.323428	-0.784591	0.432693	0.534202
ACA1_048190	282.507	-0.781782	0.175729	-4.4488	8.63528e-06	3.16937e-05
ACA1_048200	1471.51	0.468773	0.159151	2.94546	0.00322472	0.00720493
ACA1_048210	19572.9	-0.637827	0.109519	-5.82389	5.7494e-09	3.5886e-08
ACA1_048220	785.452	-0.107212	0.130987	-0.818497	0.413073	0.513948
ACA1_048230	395.121	0.945343	0.11503	8.21824	2.06507e-16	3.67314e-15
ACA1_048240	83.572	-0.367855	0.235338	-1.5631	0.11803	0.177559
ACA1_048250	1729.6	0.0367843	0.0916499	0.401356	0.688158	0.766546
ACA1_048260	9.9968	-0.691197	0.461243	-1.49855	0.13399	0.198487
ACA1_048370	133.487	-1.3709	0.209727	-6.5366	6.29336e-11	5.33799e-10
ACA1_048380	139.197	0.0848999	0.165562	0.512797	0.608093	0.695082
ACA1_048390	99.2956	-1.47426	0.226454	-6.51022	7.50425e-11	6.27822e-10
ACA1_048400	2143.03	-1.07454	0.283419	-3.79136	0.000149823	0.0004381
ACA1_048410	497.288	-0.274034	0.245253	-1.11735	0.263845	0.353786
ACA1_048420	131.236	0.291234	0.230564	1.26314	0.20654	0.287116
ACA1_048430	76.2449	0.0592725	0.194502	0.30474	0.760564	0.829857
ACA1_048440	192.892	-2.40434	0.568159	-4.23181	2.31819e-05	7.8972e-05
ACA1_048450	259.547	-2.78673	0.551032	-5.05729	4.25255e-07	1.94096e-06
ACA1_048460	300.302	-0.148687	0.165633	-0.897693	0.369349	0.46902
ACA1_048470	1693.59	-0.323936	0.140412	-2.30704	0.0210525	0.0389248
ACA1_048480	176.645	-0.160218	0.203435	-0.787563	0.430952	0.532622
ACA1_048490	3753.26	0.392527	0.119857	3.27495	0.00105679	0.00262019
ACA1_048500	907.304	0.783582	0.119238	6.57158	4.97833e-11	4.28056e-10
ACA1_048510	172.203	0.223274	0.160636	1.38994	0.164547	0.236823
ACA1_048520	39.784	-0.721671	0.281164	-2.56672	0.0102665	0.0204948
ACA1_048530	2563.48	0.064079	0.100826	0.635538	0.525077	0.624805
ACA1_048540	47.2565	0.137963	0.284791	0.484436	0.628076	0.712613
ACA1_048550	1269.41	0.546473	0.107104	5.10228	3.35585e-07	1.56156e-06
ACA1_048560	588.307	1.00737	0.118644	8.49072	2.05368e-17	4.0829e-16
ACA1_048570	177.359	0.0954531	0.151676	0.629323	0.529138	0.628393
ACA1_048580	114.911	-0.883458	0.222512	-3.97039	7.17546e-05	0.000222733
ACA1_048590	124.14	-0.251705	0.183848	-1.36909	0.170972	0.244687
ACA1_048600	41.6978	0.182829	0.281292	0.649961	0.515717	0.615666
ACA1_048610	0	NA	NA	NA	NA	NA
ACA1_048620	199.412	0.206462	0.16521	1.2497	0.21141	0.292856
ACA1_048630	4927.03	0.781441	0.170748	4.57658	4.72635e-06	1.80572e-05
ACA1_048640	665.64	0.552411	0.0988692	5.58729	2.3064e-08	1.30076e-07
ACA1_048650	1489.92	0.081609	0.113402	0.719646	0.471743	0.573649
ACA1_048850	645.82	1.02929	0.237423	4.33526	1.45586e-05	5.13531e-05
ACA1_048860	818.566	-0.430438	0.149284	-2.88335	0.00393471	0.00862205
ACA1_048870	160.61	-1.60391	0.211126	-7.59692	3.03252e-14	4.02284e-13
ACA1_048880	743.516	-0.84907	0.235979	-3.59808	0.000320578	0.000877489
ACA1_048890	91.1972	0.902276	0.221924	4.06571	4.78875e-05	0.000153827
ACA1_049090	100.299	0.0561271	0.183535	0.305811	0.759749	0.829389
ACA1_049200	54.5198	-1.82976	0.292249	-6.26096	3.82615e-10	2.86818e-09
ACA1_049210	302.036	-0.201269	0.118503	-1.69842	0.0894278	0.139227
ACA1_049320	323.427	-0.496174	0.133964	-3.70378	0.000212407	0.000603151
ACA1_049330	11.4011	-0.534933	0.462118	-1.15757	0.247041	0.334657
ACA1_049530	22.9662	1.98484	0.474892	4.17957	2.92059e-05	9.76346e-05
ACA1_049640	202.841	0.934967	0.149755	6.24329	4.28459e-10	3.1959e-09
ACA1_049750	0.218648	-0.0528766	0.247146	-0.213949	0.830587	0.888281
ACA1_049760	7.59085	0.0357489	0.54205	0.0659514	0.947417	0.979277
ACA1_049970	469.907	1.63867	0.358938	4.56533	4.98701e-06	1.89855e-05
ACA1_049980	328.251	0.182343	0.130816	1.39389	0.16335	0.23541
ACA1_049990	2182.25	0.411851	0.104215	3.95193	7.75242e-05	0.000238915
ACA1_050000	131.908	-0.945088	0.212847	-4.44022	8.98652e-06	3.28152e-05
ACA1_050010	177.435	0.134409	0.189716	0.708475	0.47865	0.580592
ACA1_050120	464.098	1.66937	0.216596	7.7073	1.28511e-14	1.80012e-13
ACA1_050130	200.769	0.0199318	0.154781	0.128774	0.897536	0.944054
ACA1_050140	266.276	0.0873869	0.145815	0.599302	0.548972	0.643095
ACA1_050150	150.004	-0.188618	0.169706	-1.11144	0.266379	0.356929
ACA1_050160	504.865	0.394556	0.130812	3.01622	0.00255948	0.0058419
ACA1_050170	75.135	-1.50495	0.353928	-4.25213	2.11744e-05	7.24451e-05
ACA1_050180	1984.62	-1.8034	0.160069	-11.2664	1.92256e-29	1.55355e-27
ACA1_050190	210.682	0.556695	0.198831	2.79984	0.00511278	0.0109404
ACA1_050200	49.4716	0.860081	0.313276	2.74544	0.0060429	0.0127527
ACA1_050210	153.978	0.111228	0.181632	0.61238	0.540287	0.636703
ACA1_050220	280.568	1.77076	0.320454	5.52577	3.28053e-08	1.81074e-07
ACA1_050330	1080.57	-0.188062	0.1791	-1.05004	0.293699	0.387083
ACA1_050340	1911.19	-0.252465	0.114085	-2.21297	0.0269	0.0484316
ACA1_050350	1722.21	-0.789574	0.12395	-6.37013	1.88872e-10	1.48083e-09
ACA1_050360	1070.43	-0.219645	0.0986817	-2.22579	0.0260283	0.0469746
ACA1_050370	532.112	-0.189457	0.175807	-1.07764	0.281195	0.373189
ACA1_050380	427.534	-1.97815	0.266664	-7.41814	1.18774e-13	1.44548e-12
ACA1_050390	163.774	-2.50601	0.517021	-4.84702	1.25327e-06	5.30684e-06
ACA1_050400	2882.32	-1.89439	0.472823	-4.00655	6.16122e-05	0.000193205
ACA1_050410	3.23578	0.026976	0.557136	0.0484191	0.961382	0.990511
ACA1_050420	9.53809	-0.161551	0.465076	-0.347365	0.728317	0.801656
ACA1_050430	160.78	0.157409	0.187055	0.841508	0.400063	0.500424
ACA1_050440	75.9793	0.290809	0.242203	1.20068	0.229875	0.314894
ACA1_050450	91.181	0.262758	0.221196	1.1879	0.234874	0.320807
ACA1_050460	252.405	1.73101	0.145836	11.8695	1.70398e-32	1.85585e-30
ACA1_050470	92.6423	-1.45269	0.429866	-3.37939	0.000726468	0.00185473
ACA1_050480	26.5714	-0.310282	0.378443	-0.819893	0.412277	0.513087
ACA1_050490	315.112	-0.767911	0.237909	-3.22775	0.00124766	0.00304965
ACA1_050500	4.39231	2.3325	0.535656	4.35448	1.33386e-05	4.73722e-05
ACA1_050510	362.188	0.291317	0.183221	1.58998	0.111839	0.169433
ACA1_050520	232.578	-0.492229	0.141488	-3.47895	0.000503381	0.00132385
ACA1_050620	54.9046	-0.0606668	0.268417	-0.226017	0.821188	0.880849
ACA1_050630	23.8815	-2.26637	0.452357	-5.01013	5.43937e-07	2.44333e-06
ACA1_050740	82.4254	-0.235031	0.228429	-1.0289	0.303526	0.397837
ACA1_050750	0.435958	1.24722	0.343329	3.63272	0.00028045	0.000775844
ACA1_050760	188.487	-0.421321	0.158684	-2.65509	0.00792868	0.0162665
ACA1_050860	27.1492	0.739046	0.305571	2.41858	0.0155813	0.0297608
ACA1_050870	485.826	1.25851	0.135555	9.2841	1.63081e-20	4.71367e-19
ACA1_050880	107.34	0.613348	0.201295	3.04701	0.00231131	0.00532235
ACA1_050990	123.944	0.628291	0.167051	3.76108	0.000169183	0.000489756
ACA1_051000	7.91805	-1.30387	0.485391	-2.68623	0.00722638	0.0149593
ACA1_051110	133.632	-1.94149	0.318717	-6.09157	1.11811e-09	7.8639e-09
ACA1_051220	12.9901	-1.19717	0.441017	-2.71456	0.00663648	0.0138633
ACA1_051330	30.1426	-1.28682	0.354834	-3.62654	0.000287246	0.000793767
ACA1_051440	344.604	-1.03379	0.158359	-6.52815	6.65867e-11	5.61615e-10
ACA1_051450	206.51	0.0947271	0.155366	0.609704	0.542058	0.63844
ACA1_051460	10.173	1.543	0.533959	2.88974	0.00385561	0.00846229
ACA1_051470	25.3457	2.28079	0.480914	4.74261	2.10982e-06	8.5152e-06
ACA1_051480	12618.7	-0.882139	0.101905	-8.6565	4.86472e-18	1.04752e-16
ACA1_051490	342.803	-0.0849772	0.387927	-0.219055	0.826608	0.884858
ACA1_051500	108.773	-0.0817532	0.274483	-0.297844	0.765822	0.834141
ACA1_051510	129.245	-0.14798	0.244849	-0.604371	0.545597	0.64164
ACA1_051520	0.36505	0.491684	0.303125	1.62205	0.104793	0.159951
ACA1_051530	326.85	-0.488061	0.232694	-2.09744	0.0359545	0.0628514
ACA1_051540	91.8522	-1.33004	0.325422	-4.08713	4.36745e-05	0.000141258
ACA1_051550	1856.09	-0.779827	0.179018	-4.35613	1.32383e-05	4.70383e-05
ACA1_051660	252.296	-0.528546	0.144432	-3.65949	0.000252722	0.000706944
ACA1_051670	116.412	-0.139972	0.203056	-0.689327	0.490618	0.592288
ACA1_051680	41.8229	-1.79454	0.337513	-5.31695	1.05524e-07	5.33655e-07
ACA1_051690	402.093	-0.452112	0.12546	-3.60363	0.000313803	0.000861454
ACA1_051700	324.076	-0.310625	0.114528	-2.71223	0.00668315	0.0139491
ACA1_051710	286.389	0.693862	0.137679	5.03971	4.66237e-07	2.11644e-06
ACA1_051820	1118.49	0.248614	0.104964	2.36855	0.0178578	0.0336429
ACA1_051830	439.9	-2.77777	0.523597	-5.30516	1.12572e-07	5.66629e-07
ACA1_051840	481.587	-0.240839	0.173088	-1.39142	0.164098	0.236357
ACA1_051850	4943.03	0.0069404	0.141033	0.049211	0.960751	0.990064
ACA1_051860	529.647	0.396404	0.120209	3.29763	0.000975046	0.00243357
ACA1_051870	1329.11	-0.272997	0.0850233	-3.21085	0.00132343	0.00321342
ACA1_051880	1131.54	1.33246	0.189071	7.04739	1.82305e-12	1.91077e-11
ACA1_051890	19.4669	-0.686122	0.388209	-1.7674	0.0771608	0.122257
ACA1_051900	25.6071	-0.876651	0.321265	-2.72874	0.00635764	0.0133494
ACA1_051910	139.353	-0.987061	0.198087	-4.98296	6.26196e-07	2.77632e-06
ACA1_051920	180.734	0.955286	0.181393	5.26639	1.39135e-07	6.89711e-07
ACA1_051930	87.7063	0.988278	0.250296	3.94844	7.86624e-05	0.000241976
ACA1_051940	276.488	-0.555145	0.150794	-3.68148	0.000231883	0.000654007
ACA1_051950	25.5636	0.0992784	0.370099	0.268248	0.788508	0.852487
ACA1_052060	54.2249	0.518958	0.2507	2.07004	0.0384489	0.066746
ACA1_052070	4.46971	-0.477384	0.533449	-0.8949	0.370841	0.470621
ACA1_052170	9.4353	0.35529	0.449943	0.789633	0.429742	0.531388
ACA1_052180	143.205	0.850075	0.161698	5.25716	1.46296e-07	7.22586e-07
ACA1_052190	926.363	0.522356	0.142286	3.67117	0.000241442	0.000678802
ACA1_052200	167.919	0.884476	0.215301	4.10809	3.9895e-05	0.000129901
ACA1_052210	379.559	-0.874785	0.130009	-6.72865	1.7125e-11	1.56658e-10
ACA1_052220	374.758	-0.556907	0.169515	-3.2853	0.00101872	0.00253165
ACA1_052230	35.3732	0.447984	0.396966	1.12852	0.259101	0.348357
ACA1_052240	193.096	-0.0621024	0.202541	-0.306616	0.759136	0.8289
ACA1_052250	574.928	-0.0584631	0.128555	-0.454771	0.649274	0.731527
ACA1_052260	268.059	0.919679	0.214143	4.29471	1.74925e-05	6.0761e-05
ACA1_052270	102.165	2.15762	0.203872	10.5832	3.5642e-26	1.93393e-24
ACA1_052280	50.8335	1.20158	0.309569	3.88145	0.000103835	0.000312629
ACA1_052290	40.2945	0.833845	0.260107	3.20578	0.00134698	0.00326587
ACA1_052300	45.027	-0.56061	0.315995	-1.77411	0.0760454	0.120744
ACA1_052310	176.621	-0.732659	0.517107	-1.41684	0.15653	0.227111
ACA1_052320	57.0773	-0.119207	0.286427	-0.416188	0.677272	0.757058
ACA1_052330	385.386	0.0647351	0.135709	0.477015	0.633351	0.717353
ACA1_052340	5.04508	1.53694	0.538589	2.85365	0.00432204	0.00939818
ACA1_052350	85.5113	-2.34438	0.451039	-5.19774	2.01728e-07	9.6992e-07
ACA1_052360	639.32	0.89036	0.204298	4.35815	1.31169e-05	4.66621e-05
ACA1_052370	0.23762	0	0.288207	0	1	1
ACA1_052380	218.461	-0.902964	0.156666	-5.76363	8.23228e-09	5.00531e-08
ACA1_052390	305.841	-0.185188	0.188601	-0.981901	0.326149	0.423062
ACA1_052400	502.662	-0.673619	0.0964816	-6.98184	2.91347e-12	2.95875e-11
ACA1_052410	36.1089	0.291736	0.259162	1.12569	0.260297	0.349746
ACA1_052420	0.0547494	0.101412	0.164818	0.615295	0.53836	0.635379
ACA1_052430	311.408	-0.736195	0.165687	-4.44328	8.85976e-06	3.24153e-05
ACA1_052440	307.538	-0.0991794	0.116786	-0.849243	0.395746	0.496044
ACA1_052450	59.8339	-1.56256	0.491769	-3.17742	0.00148593	0.00356765
ACA1_052460	98.0556	0.758931	0.214436	3.5392	0.000401346	0.00107642
ACA1_052470	1.25303	-0.446363	0.532855	-0.837683	0.402209	0.502636
ACA1_052480	825.405	0.44058	0.335519	1.31313	0.189139	0.266525
ACA1_052490	141.735	2.01469	0.22259	9.05113	1.41493e-19	3.59838e-18
ACA1_052500	261.288	0.842795	0.186619	4.51613	6.29804e-06	2.35706e-05
ACA1_052510	450.955	1.63349	0.159983	10.2104	1.7807e-24	8.13494e-23
ACA1_052520	86.7634	-1.23839	0.26646	-4.64758	3.35858e-06	1.31525e-05
ACA1_052530	333.248	-1.88441	0.245242	-7.68388	1.54341e-14	2.13408e-13
ACA1_052540	73.237	-0.0905802	0.237434	-0.381496	0.702835	0.779283
ACA1_052550	0.226105	0.0363106	0.264226	0.137422	0.890697	0.938821
ACA1_052560	3.97637	0.29342	0.570073	0.514706	0.606758	0.693768
ACA1_052570	152.092	-1.68027	0.338013	-4.97102	6.66025e-07	2.94076e-06
ACA1_052580	464.254	1.95018	0.210891	9.24734	2.30139e-20	6.52639e-19
ACA1_052590	168.583	0.7691	0.195596	3.93208	8.42147e-05	0.000257737
ACA1_052600	131.851	0.0661268	0.218622	0.302471	0.762293	0.831502
ACA1_052610	703.907	-0.931577	0.173183	-5.37916	7.4833e-08	3.89304e-07
ACA1_052620	266.436	-0.884465	0.227372	-3.88994	0.000100267	0.000302979
ACA1_052630	179.55	-0.536643	0.266155	-2.01628	0.0437709	0.0745807
ACA1_052640	657.402	-0.126984	0.165525	-0.767158	0.442987	0.543874
ACA1_052650	53.2831	0.581446	0.206298	2.81848	0.00482517	0.0103707
ACA1_052660	344.203	0.795795	0.146943	5.41568	6.10565e-08	3.24015e-07
ACA1_052670	190.058	0.24185	0.161892	1.4939	0.135201	0.200027
ACA1_052680	122.987	0.880426	0.256453	3.43309	0.000596748	0.00154693
ACA1_052690	215.942	0.524613	0.185566	2.8271	0.00469715	0.010133
ACA1_052700	422.001	-0.426736	0.392296	-1.08779	0.276688	0.368607
ACA1_052710	906.681	0.468999	0.182676	2.56738	0.0102472	0.0204644
ACA1_052720	455.548	0.120186	0.156656	0.767197	0.442964	0.543874
ACA1_052730	236.109	-0.700989	0.128184	-5.46862	4.53544e-08	2.45384e-07
ACA1_052740	58.6388	-2.0233	0.477093	-4.2409	2.22625e-05	7.59603e-05
ACA1_052750	197.699	0.851579	0.218434	3.89857	9.67612e-05	0.000293328
ACA1_052760	6.60133	-0.499326	0.527275	-0.946993	0.343642	0.44175
ACA1_052770	58.8758	0.58884	0.36256	1.62412	0.104351	0.159373
ACA1_052780	427.625	0.581826	0.133138	4.37008	1.24199e-05	4.43715e-05
ACA1_052790	1553.77	-0.568915	0.140247	-4.05653	4.98076e-05	0.000159365
ACA1_052800	79.4936	0.929525	0.436544	2.12928	0.0332308	0.0585807
ACA1_052810	588.001	0.24315	0.16043	1.51562	0.129617	0.19277
ACA1_052820	202.292	0.560619	0.163297	3.43312	0.000596685	0.00154693
ACA1_052830	750.293	-0.0672991	0.129782	-0.518557	0.60407	0.691588
ACA1_052840	1023.21	-1.58209	0.330645	-4.78486	1.71104e-06	7.05154e-06
ACA1_052850	918.321	0.294692	0.178685	1.64922	0.099102	0.152285
ACA1_052860	63.4075	-0.445931	0.224418	-1.98706	0.0469162	0.0792927
ACA1_052870	96.3985	-0.365381	0.192564	-1.89745	0.0577681	0.0952242
ACA1_052880	2.37681	-0.186327	0.552513	-0.337235	0.73594	0.807804
ACA1_052890	20.0203	-0.751407	0.398633	-1.88496	0.0594355	0.0976408
ACA1_053000	22.0774	-0.298961	0.388984	-0.768569	0.442149	0.543067
ACA1_053110	770.571	-0.678813	0.240657	-2.82066	0.00479243	0.0103088
ACA1_053220	446.374	-2.48226	0.456216	-5.44099	5.29867e-08	2.84019e-07
ACA1_053230	92.5121	-0.788601	0.231188	-3.41107	0.000647074	0.00166819
ACA1_053240	6882.53	-1.34803	0.105462	-12.7822	2.06215e-37	3.73424e-35
ACA1_053250	239.391	-0.00561761	0.229162	-0.0245138	0.980443	1
ACA1_053260	1058.85	0.795302	0.189597	4.1947	2.73235e-05	9.19143e-05
ACA1_053270	163.495	-0.062972	0.170674	-0.368961	0.712157	0.78698
ACA1_053280	3802.76	0.234195	0.0962258	2.4338	0.0149412	0.0286802
ACA1_053290	7094.83	0.0126877	0.145949	0.0869319	0.930726	0.968103
ACA1_053300	1986.08	-0.636778	0.140573	-4.52989	5.90151e-06	2.21749e-05
ACA1_053310	54.1492	0.440466	0.234539	1.87801	0.0603804	0.0989984
ACA1_053320	97.2027	-0.143644	0.194109	-0.740019	0.459289	0.560818
ACA1_053330	0	NA	NA	NA	NA	NA
ACA1_053340	750.73	0.4852	0.129125	3.75758	0.000171561	0.000495783
ACA1_053350	140.01	1.30538	0.186378	7.00393	2.48879e-12	2.5516e-11
ACA1_053360	212.684	0.189692	0.143662	1.3204	0.1867	0.263707
ACA1_053370	226.968	0.475141	0.141211	3.36477	0.000766082	0.00194694
ACA1_053380	32.4936	-0.760983	0.29862	-2.54834	0.0108238	0.0215131
ACA1_053390	166.572	-0.830223	0.172702	-4.80726	1.53009e-06	6.40058e-06
ACA1_053400	2518.13	0.425255	0.138502	3.07039	0.00213778	0.00496153
ACA1_053410	122.146	-0.889346	0.191022	-4.65574	3.22821e-06	1.26883e-05
ACA1_053420	158.004	-0.575198	0.18754	-3.06707	0.00216169	0.00501083
ACA1_053430	52.12	-0.257001	0.317113	-0.810443	0.417686	0.518699
ACA1_053440	535.233	-0.079922	0.128637	-0.621299	0.534403	0.633694
ACA1_053450	241.949	-0.127209	0.152201	-0.835793	0.403271	0.503785
ACA1_053460	24.0239	0.0384296	0.345322	0.111286	0.911389	0.954444
ACA1_053470	178.529	0.345944	0.158934	2.17664	0.0295071	0.0525439
ACA1_053480	121.691	-2.14329	0.46413	-4.61787	3.87697e-06	1.50454e-05
ACA1_053490	168.504	-0.77243	0.175236	-4.40794	1.04358e-05	3.76773e-05
ACA1_053600	295.832	-1.04778	0.182942	-5.72742	1.01968e-08	6.12054e-08
ACA1_053610	329.618	-0.27352	0.238989	-1.14449	0.252421	0.340779
ACA1_053620	77.5969	-2.49101	0.534801	-4.65782	3.1958e-06	1.2574e-05
ACA1_053630	314.798	0.139662	0.136416	1.02379	0.305932	0.400502
ACA1_053640	1069.88	0.666466	0.112261	5.93678	2.90674e-09	1.90779e-08
ACA1_053650	377.57	0.239229	0.145753	1.64133	0.100728	0.154531
ACA1_053660	2600.87	0.354589	0.135866	2.60984	0.00905842	0.0183192
ACA1_053670	1545.33	0.473035	0.17166	2.75565	0.00585754	0.0123911
ACA1_053780	754.447	0.0165507	0.122186	0.135456	0.892252	0.939933
ACA1_053790	355.501	0.643283	0.101549	6.3347	2.37796e-10	1.8338e-09
ACA1_053800	656.72	1.12778	0.123188	9.15493	5.43911e-20	1.47032e-18
ACA1_053810	0	NA	NA	NA	NA	NA
ACA1_053820	267.467	-0.0593917	0.196896	-0.301641	0.762926	0.831951
ACA1_053830	125.136	0.0803518	0.179891	0.446668	0.655115	0.736453
ACA1_053840	225.418	0.449013	0.222444	2.01855	0.0435344	0.074262
ACA1_053850	213.17	-0.890123	0.160398	-5.54947	2.86532e-08	1.59562e-07
ACA1_053860	542.884	0.664155	0.136596	4.86219	1.16095e-06	4.94169e-06
ACA1_053870	828.47	1.22154	0.109101	11.1964	4.2482e-29	3.24114e-27
ACA1_053880	1132.17	-0.0903535	0.154685	-0.584113	0.559145	0.651974
ACA1_053890	5143.83	-0.408527	0.108775	-3.7557	0.000172855	0.000498946
ACA1_053900	0	NA	NA	NA	NA	NA
ACA1_053910	220.907	-1.15794	0.179113	-6.46487	1.01384e-10	8.31319e-10
ACA1_053920	136.094	0.645411	0.150327	4.29339	1.75968e-05	6.10808e-05
ACA1_053930	242.639	-0.49645	0.197745	-2.51056	0.012054	0.0236578
ACA1_053940	231.637	0.0217363	0.118433	0.183532	0.854381	0.908029
ACA1_053950	152.515	-1.03286	0.159627	-6.4705	9.76804e-11	8.02699e-10
ACA1_053960	706.182	-0.404079	0.163862	-2.46597	0.0136643	0.026478
ACA1_053970	83.7914	0.0276677	0.270216	0.102391	0.918446	0.959774
ACA1_053980	36.0383	1.69871	0.31359	5.41698	6.06141e-08	3.21919e-07
ACA1_053990	70.066	0.748039	0.290122	2.57837	0.00992689	0.0198855
ACA1_054000	109.876	0.897656	0.16832	5.33302	9.65904e-08	4.93291e-07
ACA1_054010	213.819	-0.690735	0.23509	-2.93817	0.0033016	0.0073581
ACA1_054020	889.139	1.20702	0.142961	8.44303	3.09225e-17	6.02028e-16
ACA1_054030	375.977	-0.617074	0.175939	-3.50732	0.000452645	0.00120093
ACA1_054040	733.814	-0.710037	0.128341	-5.53243	3.15827e-08	1.74903e-07
ACA1_054050	273.202	0.584055	0.195356	2.98969	0.00279261	0.00632504
ACA1_054060	54.8909	-0.440491	0.309171	-1.42475	0.15423	0.224164
ACA1_054070	904.089	0.468745	0.0985183	4.75795	1.95572e-06	7.9509e-06
ACA1_054080	22.764	-0.842299	0.340306	-2.47513	0.0133189	0.0258802
ACA1_054090	72.9704	1.5609	0.220456	7.08033	1.43816e-12	1.53085e-11
ACA1_054100	626.799	1.01125	0.169556	5.9641	2.45987e-09	1.6352e-08
ACA1_054110	21.0494	-0.587516	0.368051	-1.59629	0.110425	0.16756
ACA1_054120	175.816	1.11941	0.245925	4.55185	5.31754e-06	2.01519e-05
ACA1_054130	225.6	0.877878	0.163127	5.38155	7.38456e-08	3.8458e-07
ACA1_054140	1440.65	-0.968217	0.551155	-1.7567	0.0789682	0.124752
ACA1_054150	276.621	1.7356	0.175406	9.89478	4.38554e-23	1.69883e-21
ACA1_054160	14.0881	0.7366	0.442038	1.66637	0.095639	0.147507
ACA1_054170	206.93	0.00581346	0.1552	0.0374579	0.97012	0.997117
ACA1_054180	240.894	0.0410615	0.178653	0.22984	0.818216	0.878351
ACA1_054190	910.231	-0.465696	0.107704	-4.32383	1.53341e-05	5.38361e-05
ACA1_054200	26600.7	-1.24984	0.129709	-9.63576	5.64716e-22	1.93783e-20
ACA1_054210	226.145	-1.83932	0.175282	-10.4935	9.25195e-26	4.82836e-24
ACA1_054220	742.51	-2.27532	0.215299	-10.5682	4.18425e-26	2.23805e-24
ACA1_054230	1199.86	0.29838	0.079146	3.76999	0.000163253	0.00047396
ACA1_054240	7.28867	2.35476	0.498828	4.72057	2.3518e-06	9.42852e-06
ACA1_054250	160.487	-0.872293	0.336124	-2.59515	0.0094549	0.0190441
ACA1_054260	0.141605	-0.102327	0.165841	-0.617016	0.537224	0.635379
ACA1_054270	52.9874	-0.876312	0.332355	-2.63667	0.00837238	0.0170742
ACA1_054280	52.1433	2.00892	0.436086	4.60671	4.09081e-06	1.57977e-05
ACA1_054290	16.0889	-0.120453	0.456924	-0.263617	0.792075	0.855052
ACA1_054300	7.56329	1.32147	0.564085	2.34268	0.0191459	0.0357915
ACA1_054310	19.2413	0.326131	0.361644	0.901802	0.367162	0.466834
ACA1_054320	8390.49	0.935968	0.129898	7.20543	5.78594e-13	6.51405e-12
ACA1_054330	586.623	0.646379	0.15631	4.13525	3.54575e-05	0.000116767
ACA1_054340	9460.59	-1.10667	0.213506	-5.18331	2.17988e-07	1.04376e-06
ACA1_054350	133.243	1.41629	0.262466	5.39612	6.80985e-08	3.58627e-07
ACA1_054360	735.111	0.401053	0.0860158	4.66255	3.12308e-06	1.23073e-05
ACA1_054370	90.1268	-0.628678	0.193701	-3.2456	0.00117202	0.00288204
ACA1_054380	339.983	0.839752	0.203585	4.12483	3.7101e-05	0.000121717
ACA1_054390	38.3863	-0.560142	0.392194	-1.42823	0.153227	0.222964
ACA1_054400	0.769433	0	0.421299	0	1	1
ACA1_054410	758.626	-0.63624	0.0896379	-7.09789	1.26673e-12	1.36284e-11
ACA1_054420	90.4987	0.708928	0.234672	3.02093	0.00252002	0.00575885
ACA1_054430	121.635	1.79346	0.527663	3.39887	0.000676637	0.00173844
ACA1_054440	384.984	0.121749	0.0927574	1.31255	0.189335	0.266726
ACA1_054450	68.892	0.296964	0.228867	1.29754	0.194445	0.272877
ACA1_054460	4175.56	-1.31449	0.145588	-9.02885	1.73491e-19	4.36049e-18
ACA1_054470	247.813	-0.461767	0.157087	-2.93957	0.00328665	0.00732805
ACA1_054480	737.598	-0.50977	0.218829	-2.32954	0.0198307	0.0369337
ACA1_054490	110.128	-0.597655	0.181792	-3.28757	0.00101055	0.00251217
ACA1_054500	976.436	0.812419	0.150947	5.38215	7.36014e-08	3.83846e-07
ACA1_054510	775.513	0.445839	0.251175	1.77501	0.0758957	0.120557
ACA1_054520	35.3643	-1.01671	0.513785	-1.97886	0.0478313	0.0806489
ACA1_054530	280.09	0.508728	0.135279	3.76058	0.000169522	0.000490267
ACA1_054540	133.626	1.24993	0.181201	6.89807	5.27153e-12	5.14154e-11
ACA1_054550	99.7945	-2.0562	0.343559	-5.98498	2.1642e-09	1.45214e-08
ACA1_054560	62.9841	-2.20398	0.356219	-6.18714	6.12645e-10	4.47645e-09
ACA1_054570	1472.59	0.0870171	0.0837236	1.03934	0.298648	0.39258
ACA1_054580	41.4694	0.285704	0.269846	1.05877	0.289706	0.38239
ACA1_054590	173.348	0.959439	0.201482	4.7619	1.91778e-06	7.81143e-06
ACA1_054600	2.51304	1.0044	0.566886	1.77178	0.0764309	0.121279
ACA1_054610	217.907	-0.645334	0.134406	-4.80138	1.57577e-06	6.57335e-06
ACA1_054620	148.065	-0.10157	0.211663	-0.479864	0.631324	0.715511
ACA1_054630	15.4844	-1.0253	0.387144	-2.64837	0.00808813	0.0165507
ACA1_054640	256.249	1.32169	0.490022	2.6972	0.0069926	0.0145311
ACA1_054650	70.5428	4.58093	0.466501	9.81975	9.25759e-23	3.45264e-21
ACA1_054660	1.03037	1.02468	0.52201	1.96295	0.0496525	0.0833644
ACA1_054670	0.414276	0.360998	0.191849	1.88168	0.0598801	0.0982745
ACA1_054680	0.82047	-0.225043	0.522241	-0.430918	0.666528	0.747104
ACA1_054690	346.39	-1.39248	0.186591	-7.46273	8.47509e-14	1.04754e-12
ACA1_054700	212.377	0.892926	0.175567	5.08595	3.65782e-07	1.689e-06
ACA1_054710	226.229	0.8896	0.211686	4.20244	2.64051e-05	8.9004e-05
ACA1_054720	53.2587	-0.353587	0.504315	-0.701122	0.483227	0.585057
ACA1_054730	71.35	-0.762677	0.476852	-1.5994	0.109732	0.166638
ACA1_054740	214.281	0.296244	0.128105	2.31252	0.0207492	0.0384397
ACA1_054750	427.613	0.313048	0.102723	3.04748	0.00230765	0.00531568
ACA1_054760	379.562	1.37332	0.137795	9.96642	2.13803e-23	8.59212e-22
ACA1_054770	3.51567	2.28223	0.564503	4.0429	5.27952e-05	0.000167903
ACA1_054780	375.407	1.57814	0.233331	6.76352	1.34676e-11	1.25027e-10
ACA1_054790	84.785	0.466493	0.217625	2.14357	0.0320675	0.0566762
ACA1_054800	55.2141	0.932845	0.36472	2.5577	0.0105366	0.0209949
ACA1_054810	3.16604	0.769931	0.568912	1.35334	0.175947	0.250852
ACA1_054820	1080.43	-0.835925	0.19594	-4.26623	1.98802e-05	6.84378e-05
ACA1_054830	108.106	0.39304	0.203891	1.9277	0.0538926	0.0895727
ACA1_054840	392.842	-0.479228	0.119503	-4.01018	6.06712e-05	0.000190533
ACA1_054850	293.979	-0.678573	0.233566	-2.90527	0.00366934	0.00809603
ACA1_054860	71.708	1.06572	0.278244	3.83015	0.000128064	0.000378674
ACA1_054870	2.57367	1.11967	0.569153	1.96726	0.0491538	0.0826378
ACA1_054880	86.5178	0.369182	0.225192	1.63941	0.101129	0.155082
ACA1_054890	184.011	0.469852	0.169182	2.77719	0.00548306	0.0116613
ACA1_054900	274.477	0.571321	0.217514	2.6266	0.00862431	0.0175262
ACA1_054910	96.2309	-0.426696	0.228214	-1.86972	0.0615226	0.100619
ACA1_054920	379.723	-0.0897968	0.110782	-0.81057	0.417613	0.518652
ACA1_054930	879.62	2.677	0.120636	22.1906	4.23076e-109	3.17942e-105
ACA1_054940	880.176	0.263644	0.297494	0.886217	0.375501	0.475425
ACA1_054950	286.884	-0.781793	0.183962	-4.24975	2.14008e-05	7.31697e-05
ACA1_054960	0.0887971	-0.199503	0.164818	-1.21045	0.226108	0.310186
ACA1_054970	194.446	1.42369	0.188636	7.54724	4.44566e-14	5.72075e-13
ACA1_054980	37.2072	0.423982	0.290567	1.45915	0.144524	0.2119
ACA1_054990	125.915	-0.833757	0.174946	-4.76581	1.88096e-06	7.68439e-06
ACA1_055000	18.2307	-0.527058	0.350144	-1.50526	0.132258	0.196213
ACA1_055010	415.378	0.562186	0.164126	3.42534	0.000614026	0.00158898
ACA1_055020	7.61188	-0.0601246	0.561044	-0.107166	0.914658	0.957067
ACA1_055030	526.294	-0.556768	0.112913	-4.93095	8.18293e-07	3.57735e-06
ACA1_055040	292.646	0.226907	0.21838	1.03905	0.298783	0.392716
ACA1_055050	1788.08	-0.136066	0.126311	-1.07723	0.281379	0.373344
ACA1_055060	1617.71	-0.144173	0.0945967	-1.52408	0.127487	0.190018
ACA1_055270	960.823	-0.0545083	0.105698	-0.5157	0.606064	0.693206
ACA1_055280	11.4064	-0.918162	0.44409	-2.06751	0.038686	0.0670956
ACA1_055290	6.23685	-1.78289	0.501489	-3.55519	0.000377711	0.00101994
ACA1_055300	138.951	-0.410358	0.191321	-2.14487	0.0319636	0.0565125
ACA1_055310	724.182	0.350711	0.153773	2.2807	0.022566	0.041387
ACA1_055320	12.5799	0.60712	0.399047	1.52143	0.128153	0.190858
ACA1_055330	212.275	0.525555	0.200462	2.62171	0.0087489	0.0177601
ACA1_055340	929.614	0.663134	0.16773	3.95357	7.69939e-05	0.000237378
ACA1_055350	0.0420499	0	0.164818	0	1	1
ACA1_055360	0	NA	NA	NA	NA	NA
ACA1_055370	0.0375657	0.101412	0.164818	0.615295	0.53836	0.635379
ACA1_055380	0.375821	0.0430741	0.33866	0.12719	0.89879	0.944871
ACA1_055390	69.5926	0.291371	0.339404	0.858478	0.390628	0.490882
ACA1_055400	18.2541	0.294748	0.459129	0.641972	0.520891	0.620652
ACA1_055410	41.5282	-1.17106	0.360857	-3.24522	0.00117358	0.00288501
ACA1_055420	122.489	1.90401	0.212942	8.94145	3.8409e-19	9.23659e-18
ACA1_055430	615.632	0.50641	0.168124	3.01212	0.00259428	0.00591595
ACA1_055440	415.01	0.102456	0.188272	0.54419	0.586311	0.675834
ACA1_055450	442.18	-0.0202206	0.166214	-0.121654	0.903173	0.948284
ACA1_055460	171.344	0.609876	0.230063	2.65091	0.00802746	0.0164444
ACA1_055470	158.074	1.18395	0.256543	4.61503	3.93035e-06	1.52368e-05
ACA1_055480	142.155	0.230266	0.171027	1.34637	0.178184	0.253441
ACA1_055490	284.728	0.399929	0.116292	3.439	0.000583872	0.00151643
ACA1_055500	4.85507	2.79835	0.52566	5.32349	1.01793e-07	5.1635e-07
ACA1_055510	616.973	-1.00954	0.155104	-6.50879	7.5757e-11	6.32571e-10
ACA1_055520	475.227	-0.299482	0.151115	-1.98181	0.0475	0.0801712
ACA1_055530	0.332839	-0.49474	0.342084	-1.44625	0.148106	0.216393
ACA1_055540	392.907	0.297822	0.18348	1.62319	0.10455	0.159645
ACA1_055550	45.3437	0.4719	0.255705	1.84548	0.0649675	0.105529
ACA1_055560	10.8408	0.130946	0.445623	0.293848	0.768874	0.836193
ACA1_055570	153.679	-0.435362	0.295764	-1.47199	0.141023	0.207578
ACA1_055580	162.616	0.00633371	0.14544	0.0435486	0.965264	0.99342
ACA1_055590	85.3968	1.90145	0.254305	7.47705	7.60091e-14	9.47277e-13
ACA1_055600	284.296	-0.359998	0.155477	-2.31544	0.0205889	0.0381851
ACA1_055610	27.2399	-1.7656	0.323813	-5.45254	4.96545e-08	2.67302e-07
ACA1_055620	515.854	0.0507997	0.13538	0.375238	0.707484	0.783256
ACA1_055630	222.319	-0.228862	0.164018	-1.39535	0.16291	0.234917
ACA1_055640	982.801	0.736589	0.207835	3.5441	0.000393951	0.00105837
ACA1_055650	590.361	-0.681696	0.102488	-6.65148	2.90158e-11	2.57747e-10
ACA1_055660	349.218	0.476061	0.202194	2.35447	0.018549	0.0348055
ACA1_055670	6.85509	-0.140465	0.515313	-0.272583	0.785174	0.849588
ACA1_055680	1.56609	1.58613	0.555962	2.85295	0.00433157	0.00941618
ACA1_055790	14.6973	-0.461823	0.403243	-1.14527	0.252097	0.340458
ACA1_055800	12.9857	-0.172937	0.409269	-0.42255	0.672624	0.752982
ACA1_055810	0.320912	0	0.168431	0	1	1
ACA1_055820	199.753	-0.342831	0.172013	-1.99306	0.0462551	0.0782987
ACA1_055830	33.8114	-0.104821	0.340486	-0.307856	0.758192	0.82817
ACA1_055840	163.21	-1.85097	0.286557	-6.45934	1.05161e-10	8.59472e-10
ACA1_055950	450.551	-0.987505	0.163514	-6.03928	1.54804e-09	1.06828e-08
ACA1_055960	0.954922	0.0646651	0.490834	0.131745	0.895186	0.942004
ACA1_055970	5.66027	0.705387	0.5169	1.36465	0.172364	0.246257
ACA1_055980	0.416682	-0.269368	0.41274	-0.652634	0.513992	0.614111
ACA1_055990	0.588871	-0.0393142	0.39867	-0.0986134	0.921445	0.961491
ACA1_056090	28.0851	-1.90094	0.414118	-4.59033	4.42539e-06	1.69851e-05
ACA1_056300	100.16	-0.145534	0.222561	-0.653909	0.513171	0.613308
ACA1_056310	116.045	0.822532	0.176582	4.65807	3.1919e-06	1.2562e-05
ACA1_056320	58.825	0.28172	0.216793	1.29949	0.193777	0.272139
ACA1_056430	135.834	-0.00484854	0.160184	-0.0302685	0.975853	1
ACA1_056540	19.0079	-1.76977	0.481162	-3.67813	0.000234953	0.000661548
ACA1_056550	0.427004	-0.632989	0.412064	-1.53614	0.124503	0.186031
ACA1_056560	0	NA	NA	NA	NA	NA
ACA1_056670	5.85134	2.79379	0.551363	5.06707	4.03988e-07	1.84838e-06
ACA1_056770	0	NA	NA	NA	NA	NA
ACA1_056880	0	NA	NA	NA	NA	NA
ACA1_056890	0	NA	NA	NA	NA	NA
ACA1_056900	0	NA	NA	NA	NA	NA
ACA1_056910	0	NA	NA	NA	NA	NA
ACA1_056920	0	NA	NA	NA	NA	NA
ACA1_056930	0.0171837	0	0.164818	0	1	1
ACA1_056940	0.0443986	-0.0991983	0.164818	-0.601866	0.547263	0.64164
ACA1_056950	0	NA	NA	NA	NA	NA
ACA1_056960	0	NA	NA	NA	NA	NA
ACA1_056970	0.25457	0	0.171684	0	1	1
ACA1_056980	0	NA	NA	NA	NA	NA
ACA1_056990	0	NA	NA	NA	NA	NA
ACA1_057000	0	NA	NA	NA	NA	NA
ACA1_057010	0	NA	NA	NA	NA	NA
ACA1_057020	0	NA	NA	NA	NA	NA
ACA1_057030	0.02155	0	0.164818	0	1	1
ACA1_057040	4.84212	-1.52186	0.545097	-2.7919	0.0052399	0.0111837
ACA1_057050	3.99316	-0.164821	0.569621	-0.289352	0.772312	0.838657
ACA1_057060	842.747	-0.906191	0.142029	-6.38032	1.76717e-10	1.39352e-09
ACA1_057070	77.5348	-0.723779	0.233698	-3.09707	0.00195443	0.0045777
ACA1_057080	185.271	0.61517	0.178587	3.44465	0.000571795	0.00148738
ACA1_057090	167.232	0.805752	0.188106	4.2835	1.83972e-05	6.36242e-05
ACA1_057100	532.852	0.421341	0.128815	3.2709	0.00107204	0.00265582
ACA1_057110	116.549	-1.24158	0.327328	-3.79309	0.000148787	0.00043541
ACA1_057120	141.596	-0.862315	0.215934	-3.99342	6.51272e-05	0.000203463
ACA1_057130	74.8878	0.458984	0.192671	2.38222	0.0172086	0.0325422
ACA1_057140	203.151	0.777628	0.170884	4.55061	5.34916e-06	2.02616e-05
ACA1_057150	242.362	0.373687	0.139089	2.68668	0.00721655	0.0149465
ACA1_057160	88.3658	1.18831	0.196911	6.03475	1.59213e-09	1.09518e-08
ACA1_057170	86.4481	-1.04645	0.270736	-3.8652	0.000110997	0.000332724
ACA1_057180	3693.36	-1.57146	0.249032	-6.31027	2.78554e-10	2.13497e-09
ACA1_057190	354.66	-0.0110854	0.335223	-0.0330687	0.97362	0.999488
ACA1_057200	177.544	-0.113763	0.210617	-0.540143	0.589098	0.67833
ACA1_057210	53.3785	0.497832	0.298572	1.66737	0.0954401	0.147291
ACA1_057220	61.6277	0.167728	0.27662	0.606348	0.544284	0.640409
ACA1_057230	218.43	1.1289	0.200124	5.64099	1.69079e-08	9.76279e-08
ACA1_057240	195.277	1.14012	0.212544	5.36414	8.1338e-08	4.20251e-07
ACA1_057250	1630.12	-1.59199	0.146967	-10.8323	2.42045e-27	1.51581e-25
ACA1_057260	1065.8	1.18094	0.167088	7.06777	1.57438e-12	1.66607e-11
ACA1_057270	0.298291	-0.211397	0.277721	-0.761183	0.446548	0.547708
ACA1_057280	34.1674	0.0368472	0.295253	0.124799	0.900683	0.946529
ACA1_057290	32.9783	-0.516748	0.310914	-1.66203	0.0965074	0.148739
ACA1_057300	350.88	-0.0155364	0.18683	-0.083158	0.933726	0.969889
ACA1_057310	28.0321	0.748898	0.32032	2.33797	0.019389	0.0361964
ACA1_057320	91.67	0.828228	0.181618	4.56027	5.10891e-06	1.94102e-05
ACA1_057330	64.5907	2.32561	0.558995	4.16033	3.17781e-05	0.000105529
ACA1_057340	33.8944	-0.00977565	0.286499	-0.0341211	0.972781	0.998763
ACA1_057350	18.0476	-0.765322	0.398521	-1.92041	0.0548066	0.0909108
ACA1_057360	219.563	-0.409909	0.16894	-2.42636	0.0152513	0.0291992
ACA1_057370	188.499	-1.30232	0.248613	-5.23836	1.62009e-07	7.94713e-07
ACA1_057380	116.489	1.70473	0.566922	3.00699	0.00263851	0.00600678
ACA1_057390	214.297	0.186747	0.174456	1.07045	0.284415	0.376443
ACA1_057400	257.555	2.52404	0.462435	5.45816	4.81106e-08	2.59177e-07
ACA1_057410	41.7312	1.00058	0.510076	1.96162	0.0498062	0.0835943
ACA1_057420	597.417	3.75515	0.300578	12.4931	8.14182e-36	1.33013e-33
ACA1_057430	210.273	0.386762	0.141861	2.72635	0.00640395	0.0134345
ACA1_057440	276.686	0.192445	0.137964	1.39489	0.163049	0.23506
ACA1_057450	90.6748	-1.54294	0.245509	-6.28466	3.28578e-10	2.48918e-09
ACA1_057460	191.831	1.62004	0.365202	4.43603	9.16346e-06	3.33964e-05
ACA1_057470	19.4965	0.465077	0.377345	1.2325	0.217763	0.300577
ACA1_057480	0.120266	0.0994139	0.165781	0.59967	0.548726	0.642918
ACA1_057490	408.827	-0.216795	0.111909	-1.93725	0.0527152	0.0878391
ACA1_057500	135.446	-2.01863	0.560144	-3.60378	0.000313621	0.000861112
ACA1_057510	214.76	0.00239878	0.198476	0.012086	0.990357	1
ACA1_057520	179.873	0.098097	0.169452	0.578909	0.562651	0.655147
ACA1_057530	775.502	-0.513761	0.109281	-4.70129	2.58526e-06	1.0304e-05
ACA1_057540	1.45428	0.751233	0.564555	1.33066	0.1833	0.259489
ACA1_057550	3.4813	-0.957174	0.560789	-1.70684	0.0878525	0.137044
ACA1_057560	0.104072	-0.157239	0.165653	-0.949209	0.342514	0.440521
ACA1_057570	0.53194	-0.236389	0.458432	-0.515647	0.606101	0.693206
ACA1_057780	0	NA	NA	NA	NA	NA
ACA1_057790	792.606	0.511874	0.179764	2.84748	0.00440668	0.00956426
ACA1_057800	619.332	0.268289	0.214892	1.24848	0.211855	0.293337
ACA1_057810	165.515	1.3558	0.243996	5.55667	2.74976e-08	1.53639e-07
ACA1_057820	127.147	0.258668	0.171657	1.50688	0.131841	0.19571
ACA1_057830	344.924	-0.243335	0.235488	-1.03332	0.301453	0.395465
ACA1_057840	99.7036	-0.108581	0.198533	-0.546915	0.584437	0.674092
ACA1_057850	76.1985	-0.23119	0.262231	-0.881627	0.377979	0.477999
ACA1_057860	175.78	-0.827145	0.167228	-4.94621	7.56712e-07	3.31973e-06
ACA1_057870	28.9101	-0.673505	0.423915	-1.58878	0.112111	0.169759
ACA1_057880	59.1647	1.81706	0.393881	4.61321	3.96501e-06	1.53514e-05
ACA1_057890	0.187043	0.130029	0.168997	0.76942	0.441644	0.542683
ACA1_057900	0.785617	0.205385	0.441695	0.464992	0.641937	0.725055
ACA1_057910	0.0200982	0	0.164818	0	1	1
ACA1_057920	0	NA	NA	NA	NA	NA
ACA1_057930	100.594	0.51468	0.22075	2.3315	0.019727	0.0367589
ACA1_057940	2331.26	-0.155437	0.132733	-1.17105	0.241578	0.32862
ACA1_057950	243.217	0.745877	0.200297	3.72386	0.0001962	0.000560578
ACA1_057960	582.075	0.539393	0.210518	2.56222	0.0104005	0.0207459
ACA1_057970	455.3	-0.825913	0.22972	-3.59531	0.000324006	0.00088606
ACA1_057980	169.937	0.590942	0.190643	3.09973	0.00193695	0.00454384
ACA1_057990	158.321	0.16199	0.211297	0.766647	0.443291	0.544158
ACA1_058000	84.6416	1.63354	0.258017	6.33114	2.43355e-10	1.87283e-09
ACA1_058010	268.184	0.467554	0.131297	3.56104	0.000369385	0.000999254
ACA1_058020	849.969	-0.499843	0.127191	-3.92987	8.49923e-05	0.000260002
ACA1_058030	77.049	0.0866974	0.222311	0.389982	0.69655	0.773802
ACA1_058040	61.1063	2.0848	0.573113	3.63767	0.000275114	0.000762347
ACA1_058050	316.132	2.14602	0.497756	4.3114	1.62227e-05	5.67566e-05
ACA1_058060	218.588	-0.914186	0.180879	-5.05413	4.32353e-07	1.97097e-06
ACA1_058070	322.84	-1.94233	0.297392	-6.53121	6.52422e-11	5.51823e-10
ACA1_058080	42.7813	1.29841	0.270982	4.79149	1.65546e-06	6.85441e-06
ACA1_058090	442.499	0.753813	0.141074	5.34338	9.12299e-08	4.68141e-07
ACA1_058100	163.042	0.797699	0.183475	4.34773	1.37557e-05	4.87612e-05
ACA1_058110	128.059	3.59095	0.541092	6.63649	3.21248e-11	2.83688e-10
ACA1_058120	919.059	-1.47138	0.155084	-9.48763	2.36347e-21	7.46281e-20
ACA1_058130	107.359	-0.368027	0.215428	-1.70835	0.0875715	0.13672
ACA1_058140	257.154	0.0716074	0.216152	0.331282	0.740431	0.812076
ACA1_058150	74.7278	-0.97567	0.298454	-3.26908	0.00107897	0.0026721
ACA1_058160	0.403004	0.155807	0.173786	0.896542	0.369963	0.46972
ACA1_058170	101.646	0.236735	0.182531	1.29696	0.194646	0.273107
ACA1_058180	1.06862	0.40802	0.532969	0.765559	0.443939	0.544819
ACA1_058190	131.357	0.218399	0.178099	1.22628	0.220095	0.303322
ACA1_058200	149.005	-1.61371	0.21174	-7.62118	2.51375e-14	3.37638e-13
ACA1_058210	165.804	1.04797	0.152084	6.89071	5.55128e-12	5.40037e-11
ACA1_058220	167.31	0.768921	0.240766	3.19364	0.00140491	0.00339209
ACA1_058230	102.939	-0.537392	0.432482	-1.24258	0.214024	0.295959
ACA1_058240	281.465	-2.56476	0.424103	-6.04749	1.47118e-09	1.02039e-08
ACA1_058250	0.658093	0.816503	0.488086	1.67287	0.0943534	0.145913
ACA1_058260	40.4032	-1.83807	0.396355	-4.63743	3.52763e-06	1.37675e-05
ACA1_058270	88.3233	0.940774	0.246816	3.81164	0.000138046	0.000405954
ACA1_058280	201.098	-0.727741	0.156296	-4.65618	3.22129e-06	1.26644e-05
ACA1_058290	267.775	0.696627	0.136345	5.10931	3.23333e-07	1.50922e-06
ACA1_058300	487.963	-0.776073	0.10029	-7.73831	1.00747e-14	1.42987e-13
ACA1_058310	935.111	-1.29865	0.303939	-4.27274	1.93087e-05	6.66229e-05
ACA1_058320	61.4273	-0.480782	0.445563	-1.07904	0.280568	0.372554
ACA1_058330	28.0343	-0.33488	0.286519	-1.16879	0.24249	0.329681
ACA1_058340	383.592	1.13238	0.101555	11.1505	7.1226e-29	5.27527e-27
ACA1_058350	947.05	0.226596	0.109047	2.07796	0.0377131	0.0656355
ACA1_058360	0.232373	-0.206321	0.255936	-0.806142	0.420161	0.52117
ACA1_058370	225.701	-0.32866	0.268316	-1.2249	0.220613	0.303786
ACA1_058380	1.60457	0.127899	0.536008	0.238614	0.811405	0.872098
ACA1_058390	188.698	0.110472	0.245395	0.450181	0.65258	0.734428
ACA1_058400	0.0467759	-0.0991983	0.164818	-0.601866	0.547263	0.64164
ACA1_058410	75.278	-0.336773	0.244397	-1.37798	0.16821	0.241378
ACA1_058420	113.059	-0.0546904	0.200667	-0.272543	0.785204	0.849588
ACA1_058430	3.81396	-1.31624	0.561871	-2.3426	0.0191499	0.0357945
ACA1_058440	58.8429	0.420739	0.261132	1.61122	0.107133	0.163191
ACA1_058450	715.371	-0.406771	0.136337	-2.98356	0.00284914	0.00644239
ACA1_058460	2.81992	-1.06465	0.572838	-1.85855	0.0630914	0.102837
ACA1_058470	0	NA	NA	NA	NA	NA
ACA1_058480	0	NA	NA	NA	NA	NA
ACA1_058490	0	NA	NA	NA	NA	NA
ACA1_058500	51.5977	0.903081	0.372421	2.42489	0.0153129	0.0293113
ACA1_058510	115.234	0.924601	0.180306	5.12796	2.92893e-07	1.3787e-06
ACA1_058520	747.224	1.62746	0.231885	7.0184	2.2443e-12	2.31674e-11
ACA1_058530	451.458	0.0758987	0.115087	0.659491	0.509581	0.610036
ACA1_058540	249.546	-1.58752	0.37082	-4.2811	1.85969e-05	6.42863e-05
ACA1_058550	192.606	-1.16942	0.250491	-4.66852	3.03373e-06	1.19834e-05
ACA1_058560	305.714	-0.441084	0.137023	-3.21904	0.00128619	0.00313365
ACA1_058570	127.762	-0.468481	0.20518	-2.28327	0.0224145	0.0411443
ACA1_058580	17.0113	-0.129568	0.443215	-0.292338	0.770028	0.836781
ACA1_058590	785.25	-0.160032	0.106963	-1.49615	0.134614	0.199335
ACA1_058700	187.692	0.191895	0.220908	0.868668	0.385029	0.485363
ACA1_058710	6353.97	-0.0611949	0.124038	-0.493358	0.62176	0.706922
ACA1_058720	381.28	-0.324244	0.134334	-2.41371	0.0157911	0.0301079
ACA1_058730	361.657	0.638251	0.211319	3.02033	0.00252502	0.00576851
ACA1_058740	9375.51	-2.36113	0.203765	-11.5875	4.77009e-31	4.50908e-29
ACA1_058750	142.269	-0.832605	0.177072	-4.70207	2.5754e-06	1.02675e-05
ACA1_058760	2710.22	-2.13704	0.279797	-7.63784	2.20904e-14	2.98578e-13
ACA1_058770	6720.17	-1.11482	0.115993	-9.61106	7.18069e-22	2.43174e-20
ACA1_058780	208.569	0.263553	0.13696	1.9243	0.0543168	0.0901779
ACA1_058790	5429.9	-0.0919968	0.0932665	-0.986387	0.323943	0.420928
ACA1_058800	642.801	-0.762562	0.129728	-5.87814	4.14907e-09	2.65251e-08
ACA1_058810	4525.94	-1.201	0.15975	-7.51799	5.56227e-14	7.05493e-13
ACA1_058820	542.544	-0.434696	0.139248	-3.12174	0.00179787	0.00425075
ACA1_058830	319.378	-0.186552	0.172378	-1.08222	0.279154	0.371199
ACA1_058840	1565.43	1.17961	0.380548	3.09977	0.00193669	0.00454384
ACA1_058850	5242.96	-0.427677	0.228195	-1.87418	0.0609062	0.0997407
ACA1_058860	448.905	-0.104414	0.154429	-0.676132	0.498957	0.600233
ACA1_058870	7.14124	2.8453	0.482416	5.89803	3.67864e-09	2.37909e-08
ACA1_058880	4.91648	1.28116	0.525342	2.43872	0.0147395	0.0283328
ACA1_058890	1032.21	-0.0327843	0.127632	-0.256866	0.797282	0.859648
ACA1_058900	81.7204	-0.159163	0.285504	-0.557482	0.577198	0.667587
ACA1_058910	101.431	1.22617	0.184901	6.63148	3.32328e-11	2.9227e-10
ACA1_058920	3.89879	1.18005	0.573021	2.05935	0.0394604	0.0682928
ACA1_058930	21.683	0.139917	0.374529	0.373581	0.708716	0.784216
ACA1_058940	131.135	0.702522	0.186803	3.76077	0.000169394	0.000490179
ACA1_059050	6.72135	-0.103779	0.495194	-0.209573	0.834001	0.891095
ACA1_059160	0	NA	NA	NA	NA	NA
ACA1_059170	0.0408599	0.101412	0.164818	0.615295	0.53836	0.635379
ACA1_059280	0	NA	NA	NA	NA	NA
ACA1_059290	30.645	-1.07906	0.348557	-3.09579	0.00196289	0.00459536
ACA1_059300	152.663	-1.10165	0.209526	-5.25781	1.4578e-07	7.20512e-07
ACA1_059310	3.50163	-1.1112	0.567615	-1.95766	0.0502696	0.0842747
ACA1_059420	0.996004	0.0506782	0.527056	0.0961534	0.923399	0.962741
ACA1_059430	83.1625	-1.45383	0.351916	-4.13119	3.60888e-05	0.000118742
ACA1_059440	145.229	1.55828	0.254624	6.11994	9.36111e-10	6.66497e-09
ACA1_059450	187.129	0.747859	0.228852	3.26787	0.0010836	0.00268265
ACA1_059460	7736.42	-1.19588	0.123439	-9.68804	3.38962e-22	1.19033e-20
ACA1_059470	120.6	0.922658	0.158599	5.81754	5.972e-09	3.71982e-08
ACA1_059480	45.1437	-0.419261	0.518377	-0.808796	0.418633	0.519501
ACA1_059490	2652.55	0.272347	0.0981533	2.77471	0.00552506	0.011744
ACA1_059500	238.389	0.416939	0.252583	1.6507	0.0987989	0.151913
ACA1_059510	270.924	-0.750585	0.221708	-3.38547	0.000710574	0.00181848
ACA1_059520	37.352	-0.00277079	0.367616	-0.00753719	0.993986	1
ACA1_059530	306.026	0.767179	0.159263	4.81705	1.45699e-06	6.12376e-06
ACA1_059540	885.884	-0.172822	0.0854116	-2.0234	0.043032	0.0735302
ACA1_059550	81.5342	-0.655372	0.211696	-3.09582	0.00196271	0.00459536
ACA1_059560	0	NA	NA	NA	NA	NA
ACA1_059570	53.8825	-1.37293	0.315013	-4.35833	1.31056e-05	4.66621e-05
ACA1_059580	156.931	-0.88465	0.219902	-4.02292	5.74814e-05	0.000181654
ACA1_059590	172.753	-0.73724	0.201744	-3.65433	0.000257851	0.000719551
ACA1_059600	1969.46	-2.35902	0.161022	-14.6503	1.34035e-48	6.29544e-46
ACA1_059610	596.491	-1.76201	0.217527	-8.1002	5.48687e-16	9.27645e-15
ACA1_059620	153.832	1.95498	0.253989	7.69712	1.39164e-14	1.94209e-13
ACA1_059730	77.3518	0.146412	0.238244	0.614546	0.538855	0.635713
ACA1_059740	1965.92	-0.190489	0.102349	-1.86118	0.0627191	0.102286
ACA1_059750	17.5544	0.854351	0.380904	2.24296	0.0248996	0.0451981
ACA1_059760	147.87	0.452954	0.191291	2.36787	0.0178906	0.0336962
ACA1_059770	116.884	-0.842915	0.237144	-3.55445	0.000378776	0.00102208
ACA1_059780	0.159479	-0.10227	0.16671	-0.613459	0.539573	0.636311
ACA1_059790	3.26041	1.27252	0.568576	2.23809	0.0252153	0.0457215
ACA1_059800	68.2367	2.26467	0.226001	10.0206	1.2372e-23	5.05304e-22
ACA1_059810	28.3588	1.64176	0.374907	4.37911	1.19165e-05	4.26757e-05
ACA1_059820	448.854	-1.02234	0.165317	-6.18413	6.24449e-10	4.54943e-09
ACA1_059830	169.095	-0.831715	0.226464	-3.67262	0.000240077	0.000675216
ACA1_059840	575.846	-0.712063	0.172221	-4.13458	3.55608e-05	0.000117082
ACA1_059850	451.87	1.19202	0.156017	7.64034	2.16646e-14	2.93615e-13
ACA1_059860	458.477	0.176361	0.0872067	2.02233	0.0431422	0.0736932
ACA1_059870	176.162	-0.935806	0.217978	-4.29313	1.76171e-05	6.11373e-05
ACA1_059980	278.831	0.821936	0.197246	4.16707	3.08539e-05	0.00010271
ACA1_059990	126.106	0.657033	0.202008	3.25251	0.00114391	0.00281806
ACA1_060000	151.094	-0.165382	0.249122	-0.663857	0.506782	0.607362
ACA1_060010	453.628	1.66805	0.191315	8.71886	2.81011e-18	6.22032e-17
ACA1_060020	148.519	1.49393	0.231382	6.45655	1.07116e-10	8.74502e-10
ACA1_060030	133.041	-0.109973	0.180412	-0.609567	0.542149	0.638497
ACA1_060040	31.6659	-0.757991	0.39283	-1.92957	0.0536608	0.0892071
ACA1_060050	0.256585	-0.133975	0.323607	-0.414005	0.67887	0.758393
ACA1_060060	0	NA	NA	NA	NA	NA
ACA1_060070	0	NA	NA	NA	NA	NA
ACA1_060080	0.0420499	0	0.164818	0	1	1
[truncated: 13,656 more rows]

## Sheet: WTvsDotA.16hr.results
	baseMean	log2FoldChange	lfcSE	stat	pvalue	padj
ACA1_000210	474.682	-0.203999	0.219163	-0.93081	0.351952	0.437384
ACA1_000220	109.069	-0.217645	0.178904	-1.21655	0.223776	0.299335
ACA1_000330	344.708	0.405597	0.11436	3.54667	0.000390136	0.00108169
ACA1_000530	312.525	0.155357	0.184433	0.842349	0.399593	0.48442
ACA1_000540	312.325	-0.545968	0.147175	-3.70965	0.000207549	0.000612972
ACA1_000550	1839.42	-0.414273	0.320342	-1.29322	0.195935	0.267999
ACA1_000560	8.36131	-0.814926	0.551703	-1.47711	0.139646	0.200937
ACA1_000570	130.502	-0.441448	0.135685	-3.25348	0.00113999	0.00284221
ACA1_000580	316.421	-0.590995	0.212739	-2.77803	0.00546904	0.0116346
ACA1_000590	267.555	-2.54209	0.403228	-6.30434	2.89424e-10	2.48313e-09
ACA1_000790	185.929	1.12459	0.185862	6.05067	1.44248e-09	1.09863e-08
ACA1_000800	1.81038	0.377742	0.55296	0.683126	0.494527	0.576762
ACA1_000810	26.9131	1.17696	0.266972	4.40857	1.04057e-05	4.03683e-05
ACA1_000820	746.246	0.131845	0.138897	0.949227	0.342505	0.427555
ACA1_000830	14.2343	-0.386466	0.531718	-0.726825	0.467333	0.550692
ACA1_000840	992.591	-0.513398	0.0938617	-5.46973	4.50725e-08	2.66342e-07
ACA1_001040	5.39668	0.482207	0.506407	0.952214	0.340989	0.425845
ACA1_001250	192.787	0.438262	0.244526	1.79229	0.0730859	0.115695
ACA1_001260	236.26	0.983127	0.117972	8.33356	7.84465e-17	1.73037e-15
ACA1_001270	25.7717	1.43995	0.500852	2.875	0.0040403	0.00888226
ACA1_001280	57.8928	0.82211	0.184148	4.46441	8.02913e-06	3.173e-05
ACA1_001290	249.042	0.0654281	0.230566	0.283772	0.776585	0.82738
ACA1_001300	181.633	0.608614	0.172312	3.53204	0.000412361	0.00113981
ACA1_001310	32.2655	0.33348	0.234128	1.42435	0.154346	0.21912
ACA1_001510	43.8373	0.118356	0.21319	0.555169	0.578779	0.654473
ACA1_001520	465.003	0.288804	0.149084	1.93719	0.0527226	0.0868372
ACA1_001530	559.875	0.601713	0.132738	4.53307	5.81318e-06	2.34671e-05
ACA1_001540	141.604	0.359198	0.216074	1.66238	0.0964365	0.146742
ACA1_001550	8.78529	-0.506001	0.392336	-1.28971	0.197151	0.26953
ACA1_001660	894.437	1.86991	0.362092	5.16417	2.41505e-07	1.26423e-06
ACA1_001860	50.3718	-0.622615	0.220068	-2.8292	0.00466652	0.0100825
ACA1_001870	365.637	-0.554719	0.144182	-3.84734	0.000119405	0.000371563
ACA1_001980	60.8432	-0.131789	0.378797	-0.347915	0.727904	0.786535
ACA1_001990	28.7859	0.38231	0.307046	1.24512	0.213087	0.287431
ACA1_002090	1.27712	-0.46377	0.571385	-0.811659	0.416987	0.502095
ACA1_002200	51.8478	0.704704	0.205191	3.43438	0.000593912	0.00158143
ACA1_002300	5711.62	-1.74341	0.225841	-7.71965	1.16649e-14	1.90651e-13
ACA1_002310	0.366621	0.529143	0.422335	1.2529	0.210243	NA
ACA1_002320	564.145	0.178783	0.180241	0.991911	0.321241	0.405458
ACA1_002330	331.525	-0.0842431	0.131785	-0.639246	0.522663	0.603149
ACA1_002430	383.813	1.96037	0.271972	7.20797	5.67905e-13	7.27401e-12
ACA1_002440	16.5323	1.2982	0.375901	3.45356	0.000553241	0.00148407
ACA1_002450	35.144	0.818796	0.301355	2.71705	0.00658672	0.0137363
ACA1_002460	23.6142	0.745544	0.322566	2.31129	0.020817	0.0383481
ACA1_002470	18.7867	-0.068018	0.290905	-0.233815	0.815128	0.859194
ACA1_002480	16.0921	0.197781	0.444096	0.445357	0.656062	0.723737
ACA1_002490	334.898	0.519677	0.149656	3.47248	0.000515673	0.00139652
ACA1_002500	2532.22	0.684852	0.130506	5.24768	1.54028e-07	8.34422e-07
ACA1_002510	2779.56	0.563185	0.188756	2.98367	0.00284813	0.00648845
ACA1_002610	502.497	1.27249	0.325618	3.90794	9.30857e-05	0.000296364
ACA1_002620	392.14	0.103141	0.085239	1.21002	0.226272	0.302254
ACA1_002630	82.8779	-1.06264	0.249839	-4.2533	2.10647e-05	7.68541e-05
ACA1_002730	0	NA	NA	NA	NA	NA
ACA1_002740	403.144	-1.78963	0.551526	-3.24487	0.00117505	0.00292306
ACA1_002750	183.995	-0.54544	0.167082	-3.2645	0.00109656	0.00274674
ACA1_002760	83.4765	1.46274	0.204103	7.16667	7.68447e-13	9.57114e-12
ACA1_002770	495.519	-0.940138	0.23617	-3.98076	6.86945e-05	0.000225312
ACA1_002780	64.5575	0.380945	0.212182	1.79537	0.0725942	0.115017
ACA1_002790	78.6123	0.443191	0.223936	1.9791	0.0478051	0.0797929
ACA1_002890	0.0360616	-0.0533091	0.158831	-0.335635	0.737146	NA
ACA1_003000	1.17976	-0.306445	0.556416	-0.550748	0.581807	0.657279
ACA1_003110	258.596	-0.15385	0.364208	-0.422422	0.672717	0.737829
ACA1_003220	129.484	0.312411	0.371511	0.840919	0.400394	0.485269
ACA1_003530	5.11122	3.42507	0.437903	7.82153	5.21861e-15	8.93346e-14
ACA1_003640	3.96802	0.487645	0.56167	0.868204	0.385283	0.470626
ACA1_003650	459.079	-0.953575	0.204872	-4.65449	3.24788e-06	1.3753e-05
ACA1_003850	26.4101	1.28956	0.311419	4.14092	3.45918e-05	0.000120866
ACA1_003860	17.4729	1.49071	0.321849	4.63172	3.62645e-06	1.524e-05
ACA1_003870	80.4446	-2.42568	0.457318	-5.30414	1.13206e-07	6.25705e-07
ACA1_004080	59.1242	-2.38863	0.471098	-5.07034	3.97097e-07	1.99921e-06
ACA1_004190	126.271	0.277655	0.14845	1.87036	0.0614333	0.0992718
ACA1_004200	142.603	0.385428	0.130941	2.94353	0.00324489	0.00729685
ACA1_004400	76.0031	0.268364	0.24174	1.11014	0.266941	0.347456
ACA1_004410	39.1029	-0.199074	0.223133	-0.892173	0.3723	0.458017
ACA1_004520	10.4719	-0.369033	0.322803	-1.14321	0.25295	0.332178
ACA1_004630	38.9611	-0.239097	0.265595	-0.900231	0.367997	0.453538
ACA1_004640	5.01327	-0.137477	0.468788	-0.29326	0.769323	0.8214
ACA1_004750	1163.73	-0.44449	0.179266	-2.4795	0.0131565	0.0254807
ACA1_004850	45.2078	-0.650927	0.237555	-2.74011	0.00614187	0.0129111
ACA1_004860	85.6644	0.547205	0.23674	2.31142	0.0208099	0.0383399
ACA1_004870	28.4095	0.00324559	0.256236	0.0126664	0.989894	0.994298
ACA1_004980	4.86602	0.838366	0.513526	1.63257	0.10256	0.154853
ACA1_004990	128.888	1.2633	0.222291	5.68308	1.32291e-08	8.53656e-08
ACA1_005000	399.671	-0.583417	0.139158	-4.19248	2.75917e-05	9.8261e-05
ACA1_005010	21.718	-0.220508	0.311974	-0.706816	0.479681	0.562626
ACA1_005220	59.6446	-2.48952	0.486606	-5.11609	3.1193e-07	1.60155e-06
ACA1_005320	843.326	0.433613	0.187343	2.31454	0.0206383	0.0380626
ACA1_005430	0	NA	NA	NA	NA	NA
ACA1_005830	172.874	0.839048	0.153951	5.45009	5.03439e-08	2.95558e-07
ACA1_005940	0.0689778	0	0.15985	0	1	NA
ACA1_006050	370.972	0.0896259	0.170508	0.525639	0.599139	0.673385
ACA1_006060	122.09	0.30779	0.273597	1.12498	0.260598	0.340644
ACA1_006070	35.7762	-1.14852	0.428263	-2.6818	0.00732276	0.0151055
ACA1_006080	26.8527	-1.04777	0.479289	-2.18608	0.0288094	0.0510785
ACA1_006090	94.3188	-0.371395	0.327816	-1.13294	0.25724	0.337107
ACA1_006100	152.405	-0.378686	0.132663	-2.85451	0.00431034	0.00940229
ACA1_006110	267.947	0.367973	0.160118	2.29814	0.0215538	0.0395139
ACA1_006120	608.771	0.316921	0.10501	3.01801	0.00254444	0.00586134
ACA1_006130	1132.7	0.846625	0.164811	5.13696	2.79216e-07	1.44592e-06
ACA1_006140	76.1669	0.775105	0.154238	5.02538	5.02445e-07	2.47843e-06
ACA1_006150	810.174	-0.786549	0.16282	-4.83078	1.36e-06	6.16545e-06
ACA1_006160	0.164302	0	0.164333	0	1	NA
ACA1_006170	332.684	0.831592	0.104787	7.93602	2.08775e-15	3.77047e-14
ACA1_006180	23.8433	-0.0350132	0.272076	-0.128689	0.897604	0.92505
ACA1_006190	26.74	0.0896321	0.237488	0.377418	0.705863	0.766767
ACA1_006200	55.7106	0.0678063	0.447186	0.151629	0.87948	0.911399
ACA1_006210	601.311	-0.859294	0.288954	-2.97381	0.00294128	0.006685
ACA1_006220	11.5316	-0.0302747	0.421578	-0.0718129	0.942751	0.959145
ACA1_006230	122.808	1.5759	0.153571	10.2617	1.04807e-24	5.96164e-23
ACA1_006240	230.042	0.060949	0.13147	0.463597	0.642937	0.712686
ACA1_006250	11.2493	-0.476572	0.388859	-1.22556	0.220363	0.295563
ACA1_006260	66.017	0.720917	0.151191	4.76825	1.85836e-06	8.24115e-06
ACA1_006270	85.1422	0.285353	0.177146	1.61084	0.107215	0.16079
ACA1_006570	25.6654	1.31882	0.224392	5.87731	4.16995e-09	2.94753e-08
ACA1_006580	257.042	0.47783	0.159665	2.9927	0.00276523	0.00631852
ACA1_006680	25.5299	-1.2371	0.340407	-3.63416	0.000278885	0.000798679
ACA1_006790	15.6695	0.0815264	0.34028	0.239587	0.810651	0.855536
ACA1_007000	311.05	0.0813685	0.129536	0.628154	0.529903	0.609606
ACA1_007010	76.1384	-1.15873	0.222374	-5.21071	1.8812e-07	1.00294e-06
ACA1_007310	19.6945	0.158348	0.324354	0.488195	0.625412	0.696627
ACA1_007510	18.3913	0.442312	0.376041	1.17623	0.239502	0.317112
ACA1_007620	4.1885	2.71145	0.546139	4.96476	6.87859e-07	3.30722e-06
ACA1_007720	38.6363	-0.0484868	0.279503	-0.173475	0.862278	0.898082
ACA1_007730	83.7717	-0.528441	0.335576	-1.57473	0.115319	0.17085
ACA1_007740	434.488	0.0700636	0.125027	0.56039	0.575214	0.651487
ACA1_007750	691.418	0.739968	0.172652	4.2859	1.81997e-05	6.7199e-05
ACA1_007760	548.772	0.247324	0.100567	2.4593	0.0139208	0.0268171
ACA1_007770	337.807	-0.462943	0.512966	-0.902482	0.366801	0.452295
ACA1_007780	2666.59	0.0772121	0.149008	0.518176	0.604336	0.678012
ACA1_007790	263.367	0.0796977	0.114635	0.695232	0.48691	0.569718
ACA1_007800	280.677	-0.206119	0.148922	-1.38408	0.166335	0.233322
ACA1_007810	57.8382	0.495948	0.217334	2.28196	0.0224917	0.0409941
ACA1_007910	0	NA	NA	NA	NA	NA
ACA1_008410	18.5203	0.491761	0.334602	1.46969	0.141646	0.203511
ACA1_008610	30.3767	-0.310727	0.223705	-1.389	0.164831	0.231527
ACA1_008620	18.3727	-2.24987	0.404662	-5.55988	2.69956e-08	1.65128e-07
ACA1_008730	0.262901	-0.626551	0.408646	-1.53324	0.125218	NA
ACA1_008740	2.55437	-0.739752	0.511915	-1.44507	0.148439	0.211963
ACA1_008840	8.08409	0.868104	0.559002	1.55295	0.120434	0.177265
ACA1_008950	3.74342	-0.492107	0.540865	-0.909852	0.362901	0.448328
ACA1_009060	3.02195	-0.947761	0.560478	-1.69099	0.0908394	0.139474
ACA1_009160	246.476	0.0737586	0.164804	0.447553	0.654476	0.722311
ACA1_009170	758.123	-0.619158	0.216145	-2.86455	0.00417598	0.00914159
ACA1_009280	53.1568	-0.850412	0.275182	-3.09037	0.00199909	0.00471865
ACA1_009480	213.116	-0.169105	0.161679	-1.04593	0.295593	0.377941
ACA1_009790	0.0696187	-0.0382084	0.161339	-0.236821	0.812796	NA
ACA1_009890	1041.95	-0.349984	0.132674	-2.63793	0.00834148	0.0169719
ACA1_009900	770.115	1.48257	0.141252	10.4959	9.01665e-26	5.66402e-24
ACA1_009910	761.107	-0.435131	0.164642	-2.64289	0.00822009	0.0167485
ACA1_009920	152.662	0.386198	0.15132	2.55219	0.0107048	0.0212245
ACA1_009930	617.302	0.25877	0.350814	0.737626	0.460742	0.5443
ACA1_009940	282.068	0.330375	0.345322	0.956717	0.33871	0.423622
ACA1_010050	24.8488	-0.1872	0.248462	-0.753432	0.45119	0.534853
ACA1_010150	134.885	-0.307702	0.150958	-2.03833	0.0415172	0.070498
ACA1_010160	325.529	-0.388863	0.140221	-2.77322	0.00555048	0.0117862
ACA1_010170	78.6711	0.03805	0.17832	0.21338	0.83103	0.872265
ACA1_010180	361.465	0.726469	0.134552	5.39916	6.6952e-08	3.83098e-07
ACA1_010190	209.351	-0.603517	0.195499	-3.08706	0.00202144	0.00476518
ACA1_010390	27.1715	-1.25814	0.295792	-4.25344	2.10508e-05	7.68231e-05
ACA1_010500	54.8304	-0.919171	0.239817	-3.8328	0.000126691	0.000391956
ACA1_010610	60.4395	-0.0517094	0.207946	-0.248667	0.803618	0.849479
ACA1_010620	0	NA	NA	NA	NA	NA
ACA1_010730	20.0117	-0.418275	0.258429	-1.61853	0.105549	0.158817
ACA1_010930	294.93	-0.262981	0.118333	-2.22237	0.026258	0.0470281
ACA1_010940	66.8579	0.183737	0.20363	0.902308	0.366893	0.45237
ACA1_011040	175.167	0.593742	0.202716	2.92894	0.00340122	0.00760341
ACA1_011150	301.707	0.0452421	0.130904	0.345614	0.729633	0.788049
ACA1_011160	600.388	-0.985616	0.257486	-3.82784	0.000129274	0.000398921
ACA1_011260	1141.53	0.0673587	0.0937839	0.718232	0.472614	0.55551
ACA1_011270	150.929	1.11908	0.438298	2.55324	0.0106725	0.021172
ACA1_011280	1004.31	-0.153632	0.345433	-0.444753	0.656499	0.724163
ACA1_011380	2.55674	-0.586463	0.562159	-1.04323	0.29684	0.379368
ACA1_011490	211.769	-0.844396	0.196268	-4.30227	1.69057e-05	6.28549e-05
ACA1_011600	30.525	0.845428	0.354645	2.38387	0.0171316	0.0322793
ACA1_011810	38.4285	-0.522097	0.254127	-2.05447	0.03993	0.0680638
ACA1_011910	71.7487	0.64075	0.201496	3.17997	0.00147292	0.00358678
ACA1_012020	1402.33	0.961618	0.102042	9.42378	4.35124e-21	1.57957e-19
ACA1_012030	174.079	-0.46881	0.190577	-2.45994	0.0138959	0.0267726
ACA1_012040	580.936	-1.06201	0.161552	-6.57381	4.90426e-11	4.68939e-10
ACA1_012050	76.5283	0.923816	0.152594	6.05408	1.41222e-09	1.07871e-08
ACA1_012250	5.51904	-0.710695	0.474843	-1.49669	0.134473	0.194773
ACA1_012260	242.263	1.03074	0.136038	7.57683	3.54111e-14	5.40824e-13
ACA1_012270	1085.4	0.362841	0.0920848	3.94029	8.13817e-05	0.00026269
ACA1_012280	44.2977	0.156456	0.191252	0.81806	0.413323	0.498513
ACA1_012290	137.897	2.0373	0.306453	6.64801	2.97079e-11	2.90602e-10
ACA1_012300	92.2719	0.151504	0.184622	0.820621	0.411862	0.497042
ACA1_012310	300.258	0.261251	0.104337	2.50392	0.0122826	0.0239404
ACA1_012320	19.7424	-0.465582	0.318312	-1.46266	0.14356	0.205974
ACA1_012330	870.548	0.363222	0.125391	2.8967	0.00377107	0.008345
ACA1_012630	121.032	0.285363	0.176322	1.61842	0.105573	0.158821
ACA1_012740	395.991	0.171004	0.147111	1.16242	0.245066	0.323471
ACA1_012850	9.00992	-0.550835	0.441685	-1.24712	0.212353	0.286629
ACA1_012960	80.6878	-0.926556	0.22603	-4.09926	4.14471e-05	0.00014251
ACA1_012970	285.954	-2.17274	0.216609	-10.0307	1.11765e-23	5.66587e-22
ACA1_012980	325.501	-0.29268	0.21639	-1.35256	0.176196	0.245013
ACA1_012990	260.531	0.133439	0.214243	0.622842	0.533388	0.612981
ACA1_013000	408.26	0.277768	0.174132	1.59516	0.110676	0.16517
ACA1_013010	15.1367	-0.685089	0.363662	-1.88386	0.0595835	0.096737
ACA1_013120	38.8982	-0.867403	0.205679	-4.21727	2.47279e-05	8.88287e-05
ACA1_013230	42.1193	-0.471145	0.209024	-2.25402	0.0241947	0.0436957
ACA1_013240	33.8774	-0.867255	0.285134	-3.04157	0.00235349	0.00546236
ACA1_013340	634.86	-0.363638	0.167831	-2.1667	0.0302581	0.0533589
ACA1_013350	167.782	-0.884732	0.526143	-1.68154	0.0926576	0.141873
ACA1_013360	169.004	0.0323861	0.131078	0.247075	0.804851	0.850284
ACA1_013370	31.1488	0.389309	0.239077	1.62839	0.103443	0.156072
ACA1_013380	380.487	0.736483	0.138987	5.29892	1.1649e-07	6.41404e-07
ACA1_013390	9356.67	-1.77078	0.13294	-13.3202	1.76688e-40	4.55855e-38
ACA1_013490	147.606	-0.545302	0.175102	-3.1142	0.00184445	0.00439799
ACA1_013500	53.1284	0.128157	0.196882	0.650932	0.51509	0.596173
ACA1_013610	595.697	0.404923	0.103426	3.91509	9.03687e-05	0.000289052
ACA1_013620	582.766	0.367726	0.131346	2.79968	0.00511536	0.0109459
ACA1_013630	495.123	0.376473	0.128847	2.92187	0.00347942	0.00776021
ACA1_013640	537.132	-1.00525	0.113629	-8.8468	9.00659e-19	2.50727e-17
ACA1_013650	17.4329	0.32978	0.299726	1.10027	0.271215	0.35191
ACA1_013660	147.939	0.352364	0.139643	2.52332	0.0116253	0.0228056
ACA1_013670	283.635	-0.412053	0.126302	-3.26245	0.00110455	0.00276394
ACA1_013680	4.45627	-0.382847	0.572515	-0.66871	0.503681	0.585641
ACA1_013980	19.7635	1.35078	0.355931	3.79507	0.000147604	0.000449153
ACA1_013990	11.2191	-0.282068	0.390739	-0.721883	0.470367	0.553408
ACA1_014100	2230.16	-0.0446025	0.12059	-0.369869	0.71148	0.771558
ACA1_014210	819.569	0.295814	0.318094	0.929958	0.352393	0.437779
ACA1_014220	334.046	-0.620482	0.314878	-1.97055	0.0487759	0.081207
ACA1_014230	0	NA	NA	NA	NA	NA
ACA1_014240	11.7011	1.01253	0.414159	2.44478	0.014494	0.0277843
ACA1_014250	207.509	-0.469496	0.220645	-2.12783	0.0333508	0.0581385
ACA1_014350	61.7906	-1.23	0.242619	-5.06967	3.9851e-07	2.00289e-06
ACA1_014360	1567.65	0.211435	0.103141	2.04996	0.0403687	0.0687304
ACA1_014370	172.851	-0.736063	0.187063	-3.93485	8.32504e-05	0.000268123
ACA1_014380	644.576	0.412337	0.174521	2.36267	0.0181436	0.0339955
ACA1_014390	136.565	-0.0666516	0.120897	-0.551309	0.581422	0.657017
ACA1_014490	653.689	0.640411	0.120851	5.29917	1.16331e-07	6.40806e-07
ACA1_014500	0.0641089	0.136862	0.16091	0.850551	0.395019	NA
ACA1_014510	383.751	-0.39929	0.195509	-2.04231	0.0411209	0.0699205
ACA1_014520	44.4989	-1.13964	0.348526	-3.26989	0.00107588	0.00270195
ACA1_014620	242.943	-0.318453	0.2242	-1.4204	0.155491	0.220573
ACA1_014630	148.45	0.0329793	0.153262	0.215182	0.829625	0.87117
ACA1_014740	1406.93	-1.57392	0.20934	-7.51849	5.54138e-14	8.21147e-13
ACA1_014750	30.7969	-0.128278	0.264844	-0.484355	0.628134	0.699066
ACA1_014760	40.0557	0.387012	0.23836	1.62364	0.104453	0.157414
ACA1_014870	432.805	0.904545	0.212425	4.25819	2.06091e-05	7.53441e-05
ACA1_014880	21.0384	0.295963	0.300093	0.986237	0.324017	0.408471
ACA1_014980	261.541	-0.0445661	0.17787	-0.250554	0.802159	0.848184
ACA1_014990	125.06	0.407658	0.167858	2.42858	0.0151579	0.0289049
ACA1_015100	18.0847	0.227039	0.289411	0.784485	0.432755	0.516988
ACA1_015210	240.328	0.196383	0.121153	1.62095	0.105028	0.158117
ACA1_015310	463.084	0.45196	0.223199	2.02492	0.0428756	0.0724693
ACA1_015320	120.36	-0.23063	0.317829	-0.72564	0.46806	0.551278
ACA1_015330	4185.74	-2.69014	0.552042	-4.87306	1.09883e-06	5.06892e-06
ACA1_015340	189.664	-0.0716235	0.217883	-0.328725	0.742363	0.798932
ACA1_015350	453.805	-0.936236	0.152974	-6.12022	9.34476e-10	7.3297e-09
ACA1_015360	129.885	-0.943696	0.2059	-4.58328	4.57734e-06	1.88791e-05
ACA1_015370	1.66955	1.01912	0.572337	1.78063	0.0749734	0.118294
ACA1_015470	255.387	-1.21223	0.269454	-4.49884	6.83237e-06	2.72992e-05
ACA1_015480	90.1086	0.376542	0.14927	2.52256	0.0116504	0.0228406
ACA1_015490	152.856	-0.0749032	0.111763	-0.670195	0.502734	0.584678
ACA1_015500	1168.98	-0.660133	0.102233	-6.45713	1.06707e-10	9.7146e-10
ACA1_015510	280.33	0.0851945	0.12669	0.672464	0.501288	0.583141
ACA1_015520	49.9791	-0.755894	0.30172	-2.50528	0.0122354	0.0238662
ACA1_015530	214.307	0.651185	0.226673	2.8728	0.00406854	0.00893237
ACA1_015540	6.62057	-0.586818	0.417338	-1.4061	0.159695	0.225452
ACA1_015550	225.974	-1.16561	0.145264	-8.02408	1.0229e-15	1.93187e-14
ACA1_015560	447.771	0.550448	0.0980092	5.61628	1.95108e-08	1.22508e-07
ACA1_015570	114.06	0.361363	0.187135	1.93102	0.0534801	0.0879045
ACA1_015580	20.1436	0.181608	0.285909	0.635197	0.5253	0.605612
ACA1_015590	80.1071	0.012352	0.169533	0.072859	0.941918	0.958571
ACA1_015690	15.034	0.201205	0.305067	0.659543	0.509547	0.591036
ACA1_015800	87.3874	0.662054	0.171587	3.85841	0.000114129	0.000356836
ACA1_016010	32.4963	-0.414115	0.262801	-1.57578	0.115077	0.170537
ACA1_016020	2.52585	1.80947	0.574262	3.15094	0.00162744	0.00393396
ACA1_016030	14.4643	-0.403426	0.348218	-1.15855	0.246641	0.325253
ACA1_016130	38.7763	0.301144	0.27781	1.08399	0.278367	0.359608
ACA1_016140	80.2444	0.185528	0.192262	0.964975	0.334557	0.419154
ACA1_016250	722.154	-0.298919	0.0972385	-3.07408	0.00211149	0.00495805
ACA1_016360	52.4383	-1.52169	0.285246	-5.33466	9.57234e-08	5.33982e-07
ACA1_016470	280.18	-0.552401	0.144511	-3.82255	0.000132077	0.000406614
ACA1_016480	389.424	0.399135	0.238156	1.67594	0.0937501	0.143364
ACA1_016580	2.7987	0.386692	0.539095	0.717298	0.47319	0.556097
ACA1_016690	246.025	-0.520816	0.183982	-2.8308	0.00464325	0.0100398
ACA1_016900	91.0776	0.99511	0.388485	2.56151	0.0104218	0.0207145
ACA1_017200	82.3756	-0.52684	0.27362	-1.92544	0.0541743	0.0889343
ACA1_017310	28.1009	0.577254	0.46127	1.25144	0.210772	0.284921
ACA1_017320	350.331	-0.814452	0.150815	-5.40034	6.65135e-08	3.8074e-07
ACA1_017330	48.5004	0.717966	0.341137	2.10463	0.035324	0.0612457
ACA1_017430	72.109	-0.133129	0.16524	-0.805671	0.420432	0.505653
ACA1_017540	130.733	0.716447	0.186697	3.83749	0.000124299	0.000385135
ACA1_017740	3205.38	0.21342	0.110745	1.92714	0.0539626	0.088617
ACA1_017750	0.312081	0	0.166969	0	1	NA
ACA1_017760	0.0108952	-0.0708347	0.155665	-0.455045	0.649077	NA
ACA1_017770	106.847	-0.708995	0.277561	-2.55437	0.010638	0.0211094
ACA1_017780	0.306729	0.170918	0.428163	0.39919	0.689753	NA
ACA1_017880	166.634	-1.16192	0.162006	-7.17211	7.3848e-13	9.25124e-12
ACA1_017890	178.199	-0.157373	0.144443	-1.08952	0.275926	0.357093
ACA1_018000	178.531	1.32193	0.340677	3.8803	0.000104327	0.00032936
ACA1_018110	97.6897	-0.720175	0.336091	-2.14279	0.0321296	0.0562609
ACA1_018120	1524.41	-1.94942	0.31106	-6.26704	3.67968e-10	3.09633e-09
ACA1_018130	1.17378	1.31014	0.573221	2.28558	0.0222789	0.0406523
ACA1_018140	785.261	0.322012	0.220983	1.45718	0.145066	0.207783
ACA1_018340	183.481	-0.110733	0.294168	-0.376429	0.706598	0.767358
ACA1_018650	208.918	-0.731329	0.197779	-3.69772	0.000217547	0.000639365
ACA1_018760	1901.79	0.0923433	0.120583	0.765804	0.443793	0.527857
ACA1_018770	2472.67	0.54152	0.108522	4.98993	6.04009e-07	2.93434e-06
ACA1_018780	2009.97	1.10851	0.147901	7.49489	6.63522e-14	9.72268e-13
ACA1_018790	147.983	-0.127494	0.157395	-0.810025	0.417926	0.503057
ACA1_018800	654.062	0.712887	0.101171	7.04638	1.83635e-12	2.16231e-11
ACA1_018810	255.916	0.183358	0.178998	1.02436	0.305666	0.389063
ACA1_018920	110.241	1.08424	0.151174	7.17211	7.38479e-13	9.25124e-12
ACA1_018930	101.041	0.525169	0.136942	3.83497	0.00012558	0.000388684
ACA1_018940	118.075	-2.61983	0.387375	-6.76302	1.35142e-11	1.38281e-10
ACA1_018950	86.2388	-0.568533	0.210936	-2.69528	0.00703291	0.0145596
ACA1_018960	1219.81	1.73974	0.226963	7.6653	1.78416e-14	2.83894e-13
ACA1_018970	216.386	-0.77616	0.344831	-2.25084	0.0243958	0.0439763
ACA1_018980	241.176	0.110094	0.221231	0.497643	0.618736	0.690788
ACA1_018990	727.003	0.379465	0.0997359	3.80469	0.000141981	0.00043387
ACA1_019000	231.175	0.761757	0.176264	4.32167	1.5485e-05	5.80959e-05
ACA1_019010	375.4	-1.38215	0.249052	-5.54964	2.86255e-08	1.74286e-07
ACA1_019020	31.5946	-0.59499	0.272581	-2.1828	0.0290507	0.0514557
ACA1_019030	173.722	0.0439409	0.124111	0.354045	0.723305	0.78215
ACA1_019130	3.82883	-0.812245	0.533453	-1.52262	0.127854	0.186439
ACA1_019140	273.42	-0.180482	0.120971	-1.49195	0.135714	0.196216
ACA1_019150	117.913	1.51745	0.436694	3.47486	0.00051112	0.00138549
ACA1_019160	3.07118	0.387037	0.562342	0.688259	0.49129	0.57382
ACA1_019170	0.0118441	-0.0751832	0.155891	-0.48228	0.629607	NA
ACA1_019180	13.9005	-0.829823	0.418126	-1.98462	0.0471865	0.0789154
ACA1_019190	140.353	-0.201019	0.123997	-1.62117	0.104982	0.158064
ACA1_019200	38.0989	-0.166571	0.410538	-0.405738	0.684935	0.748558
ACA1_019210	9.2059	-0.197719	0.452045	-0.437389	0.661829	0.728375
ACA1_019220	247.26	-0.792069	0.142954	-5.54074	3.01198e-08	1.82768e-07
ACA1_019330	21.6839	0.863046	0.277993	3.10456	0.0019056	0.00452459
ACA1_019340	1993.78	-0.399242	0.131034	-3.04687	0.0023124	0.00537996
ACA1_019350	1077.56	0.793848	0.0955771	8.30583	9.91202e-17	2.15676e-15
ACA1_019360	490.146	-0.0518724	0.182646	-0.284005	0.776406	0.827251
ACA1_019370	39.4181	0.106586	0.286683	0.371789	0.71005	0.770353
ACA1_019380	314.563	-1.8359	0.485255	-3.78336	0.000154723	0.000469335
ACA1_019580	4.9915	-0.235138	0.519729	-0.452423	0.650964	0.719541
ACA1_019590	7.0236	-0.95834	0.510133	-1.87861	0.0602983	0.0977327
ACA1_019600	295.663	0.141149	0.156679	0.900876	0.367654	0.45327
ACA1_019610	680.882	0.110656	0.186256	0.594109	0.552439	0.630312
ACA1_019620	208.067	0.0115371	0.1776	0.0649611	0.948205	0.96307
ACA1_019630	101.863	-0.124997	0.193104	-0.647304	0.517435	0.598359
ACA1_019640	316.092	0.329543	0.161364	2.04223	0.0411287	0.0699255
ACA1_019650	51.4907	0.479107	0.196458	2.43872	0.0147392	0.0282056
ACA1_019760	105.473	-0.548466	0.351523	-1.56026	0.118699	0.175103
ACA1_019960	647.063	0.325038	0.0860372	3.77788	0.00015817	0.000478585
ACA1_019970	124.896	-0.572013	0.227379	-2.51568	0.0118803	0.0232332
ACA1_019980	0.511184	-0.423898	0.479936	-0.883237	0.377108	0.462675
ACA1_019990	16.7944	-0.572476	0.482376	-1.18679	0.235312	0.312395
ACA1_020090	66.904	0.262898	0.173165	1.51819	0.128966	0.187795
ACA1_020100	147.616	0.242602	0.261412	0.928043	0.353385	0.43871
ACA1_020110	0	NA	NA	NA	NA	NA
ACA1_020120	258.894	0.0741906	0.182921	0.405588	0.685045	0.748566
ACA1_020130	162.066	0.106171	0.264181	0.401887	0.687767	0.751024
ACA1_020140	124.191	0.0358473	0.187467	0.191219	0.848354	0.886968
ACA1_020150	451.856	-0.204516	0.124352	-1.64464	0.100043	0.151544
ACA1_020160	3608.84	0.219373	0.139325	1.57454	0.115363	0.170897
ACA1_020460	0	NA	NA	NA	NA	NA
ACA1_020470	0	NA	NA	NA	NA	NA
ACA1_020480	0.146884	0	0.164295	0	1	NA
ACA1_020490	0	NA	NA	NA	NA	NA
ACA1_020500	0	NA	NA	NA	NA	NA
ACA1_020510	0	NA	NA	NA	NA	NA
ACA1_020520	0.0380791	0	0.156099	0	1	NA
ACA1_020530	0	NA	NA	NA	NA	NA
ACA1_020630	0.110496	0	0.159832	0	1	NA
ACA1_020640	0	NA	NA	NA	NA	NA
ACA1_020650	0.0283677	0	0.156094	0	1	NA
ACA1_020660	0	NA	NA	NA	NA	NA
ACA1_020670	0	NA	NA	NA	NA	NA
ACA1_020770	577.576	0.500044	0.272097	1.83774	0.0661011	0.105914
ACA1_020780	1128.58	0.132828	0.109909	1.20853	0.226843	0.302849
ACA1_020790	12.7258	0.528494	0.373729	1.41411	0.157329	0.222647
ACA1_020800	162.262	-0.0475494	0.152214	-0.312385	0.754748	0.809688
ACA1_020810	0	NA	NA	NA	NA	NA
ACA1_020820	720.799	0.934001	0.115383	8.09481	5.73555e-16	1.10933e-14
ACA1_020830	900.6	-0.199625	0.170593	-1.17018	0.241927	0.319766
ACA1_020840	5.80451	4.31894	0.548966	7.8674	3.62096e-15	6.33361e-14
ACA1_020850	380.193	-0.0133088	0.224584	-0.0592597	0.952745	0.966322
ACA1_020860	1262.6	-0.212174	0.0916157	-2.31591	0.0205631	0.0379482
ACA1_020870	147.177	0.454544	0.28972	1.56891	0.11667	0.172498
ACA1_020880	433.757	-1.62178	0.209794	-7.73032	1.07281e-14	1.76135e-13
ACA1_020890	12.1934	-1.02261	0.366797	-2.78794	0.0053045	0.0113255
ACA1_020900	156.231	-0.528745	0.189876	-2.78468	0.00535801	0.0114237
ACA1_020910	891.205	0.0733056	0.162841	0.450167	0.65259	0.720732
ACA1_020920	309.969	1.58881	0.402424	3.94811	7.87711e-05	0.00025489
ACA1_020930	219.07	0.0275046	0.131825	0.208644	0.834726	0.875508
ACA1_020940	41.7384	1.0553	0.433285	2.43557	0.0148683	0.0284224
ACA1_020950	423.794	0.34044	0.144087	2.36274	0.0181402	0.0339955
ACA1_021050	4.10084	-0.215905	0.496306	-0.435024	0.663545	0.729985
ACA1_021160	7.13603	1.25332	0.416119	3.01194	0.00259587	0.00596458
ACA1_021170	30.5654	-0.0804019	0.250031	-0.321567	0.747781	0.803864
ACA1_021280	6.94751	0.250899	0.432742	0.579788	0.562058	0.639066
ACA1_021580	873.453	0.767371	0.133194	5.76128	8.34785e-09	5.54018e-08
ACA1_021590	8.76539	-0.637441	0.404456	-1.57605	0.115015	0.17047
ACA1_021690	486.533	-0.0330479	0.13402	-0.246589	0.805226	0.850618
ACA1_021700	1915.6	0.307245	0.112603	2.72856	0.00636108	0.0133215
ACA1_021810	526.461	-0.0927272	0.161395	-0.574534	0.565606	0.642393
ACA1_021910	0	NA	NA	NA	NA	NA
ACA1_021920	0	NA	NA	NA	NA	NA
ACA1_021930	0.308456	-0.725912	0.421932	-1.72045	0.0853515	NA
ACA1_021940	840.505	0.752939	0.159314	4.72615	2.28819e-06	9.95778e-06
ACA1_022040	128.182	1.12064	0.166311	6.7382	1.60363e-11	1.63049e-10
ACA1_022050	1.54769	0.365477	0.573487	0.637288	0.523937	0.604379
ACA1_022060	2.29301	-0.211036	0.5644	-0.373912	0.70847	0.768986
ACA1_022070	0.584153	-0.106707	0.478639	-0.222939	0.823583	0.866368
ACA1_022080	633.727	0.43932	0.118091	3.72019	0.000199073	0.000591204
ACA1_022180	14.5315	-2.31589	0.466792	-4.96129	7.00261e-07	3.36125e-06
ACA1_022190	0.0375657	0	0.156077	0	1	NA
ACA1_022200	692.767	-1.33929	0.196084	-6.83022	8.47853e-12	8.92191e-11
ACA1_022210	0.878986	-1.433	0.557427	-2.57074	0.0101481	0.0202318
ACA1_022220	1100.91	0.767031	0.127713	6.00588	1.90299e-09	1.4268e-08
ACA1_022330	2080.81	0.535326	0.121712	4.39831	1.091e-05	4.21457e-05
ACA1_022340	0.262292	0	0.16625	0	1	NA
ACA1_022350	21.3068	1.96814	0.532481	3.69618	0.000218871	0.000642863
ACA1_022360	922.773	0.115493	0.125312	0.921647	0.356713	0.442296
ACA1_022560	7.77089	-0.697455	0.484005	-1.44101	0.149582	0.213343
ACA1_022670	10.7352	-2.82504	0.456578	-6.18743	6.11526e-10	4.95254e-09
ACA1_022680	0.281088	-0.137335	0.289914	-0.473709	0.635707	NA
ACA1_022690	0.5535	-0.0830092	0.49047	-0.169244	0.865605	0.900962
ACA1_022700	722.77	1.29012	0.191228	6.74651	1.51446e-11	1.542e-10
ACA1_022710	14170.7	0.456088	0.147279	3.09676	0.00195647	0.00462787
ACA1_022720	58.1191	-0.222542	0.207326	-1.07339	0.283095	0.36438
ACA1_022730	57.1344	-0.134606	0.186292	-0.722551	0.469956	0.55297
ACA1_022840	76.4335	-0.00239888	0.177422	-0.0135208	0.989212	0.993752
ACA1_022850	231.734	0.256502	0.148455	1.72782	0.0840213	0.130517
ACA1_023050	91.0838	-0.363727	0.223605	-1.62665	0.103811	0.156562
ACA1_023060	55.6393	-0.414641	0.373377	-1.11052	0.266777	0.347305
ACA1_023070	4.01356	-1.08256	0.567018	-1.90922	0.0562333	0.0918136
ACA1_023080	0	NA	NA	NA	NA	NA
ACA1_023090	173.561	0.902551	0.157279	5.73853	9.55013e-09	6.27468e-08
ACA1_023100	15.2416	1.00751	0.421993	2.38751	0.016963	0.0319991
ACA1_023110	688.297	-1.70528	0.226211	-7.53846	4.75571e-14	7.14247e-13
ACA1_023120	7.71862	-1.27267	0.472402	-2.69404	0.00705925	0.0146058
ACA1_023130	15.3343	-1.42355	0.43001	-3.31051	0.000931264	0.00237467
ACA1_023140	0.582101	-1.27251	0.541233	-2.35114	0.0187161	0.0349276
ACA1_023150	0.192386	-0.0277371	0.232506	-0.119296	0.905041	NA
ACA1_023160	0.0670679	0	0.161319	0	1	NA
ACA1_023170	0	NA	NA	NA	NA	NA
ACA1_023180	2.40137	-0.502184	0.562426	-0.892889	0.371917	0.457705
ACA1_023380	0.00935949	0.0832647	0.15518	0.536567	0.591567	NA
ACA1_023390	248.645	-0.21115	0.125192	-1.6866	0.0916796	0.140555
ACA1_023700	29.0387	-0.633884	0.306851	-2.06577	0.03885	0.0664188
ACA1_023810	33197.6	-0.903162	0.132484	-6.81715	9.28633e-12	9.68029e-11
ACA1_023820	2995.04	-0.12485	0.153793	-0.811805	0.416904	0.502036
ACA1_023830	44.5347	-0.320938	0.321652	-0.997782	0.318385	0.402452
ACA1_023840	2.32214	0.0200867	0.546917	0.0367272	0.970703	0.980818
ACA1_023850	398.134	0.785934	0.104997	7.48533	7.13671e-14	1.03734e-12
ACA1_023860	180.035	0.708975	0.1454	4.87604	1.08239e-06	4.99949e-06
ACA1_023870	632.271	-0.203594	0.129344	-1.57405	0.115475	0.171026
ACA1_023880	521.011	0.158805	0.135572	1.17137	0.241449	0.319309
ACA1_023890	692.706	-1.2256	0.198455	-6.1757	6.58727e-10	5.29032e-09
ACA1_023990	507.988	-0.345891	0.32182	-1.07479	0.282467	0.363797
ACA1_024000	41.3354	1.12979	0.229714	4.91824	8.73246e-07	4.10832e-06
ACA1_024010	180.205	0.299032	0.128894	2.31999	0.0203416	0.0376018
ACA1_024020	704.584	-0.433548	0.145791	-2.97376	0.00294172	0.006685
ACA1_024030	7.97729	-0.30889	0.448708	-0.688398	0.491202	0.573764
ACA1_024040	953.922	-0.277607	0.0817771	-3.39468	0.000687083	0.00180392
ACA1_024050	472.675	-0.740878	0.123456	-6.00115	1.95931e-09	1.46674e-08
ACA1_024150	425.153	-1.2746	0.273319	-4.66339	3.11035e-06	1.32359e-05
ACA1_024160	1253.01	0.203428	0.322084	0.631599	0.527649	0.6074
ACA1_024170	6.79477	0.673802	0.503213	1.339	0.180571	0.249908
ACA1_024180	353.585	0.887605	0.276875	3.2058	0.00134687	0.00330889
ACA1_024190	6.40509	-0.979667	0.473498	-2.069	0.0385461	0.0659773
ACA1_024200	311.48	1.80503	0.220983	8.16817	3.13101e-16	6.32736e-15
ACA1_024210	522.402	0.750112	0.295738	2.53641	0.0111997	0.0220814
ACA1_024220	1080.5	-0.216344	0.130227	-1.66128	0.0966567	0.147046
ACA1_024230	457.778	0.353126	0.180789	1.95325	0.0507905	0.0840188
ACA1_024240	771.667	0.588715	0.127179	4.62902	3.67408e-06	1.54043e-05
ACA1_024250	122.227	0.435638	0.255935	1.70214	0.088729	0.136742
ACA1_024260	92.184	0.68432	0.163915	4.17484	2.98191e-05	0.000105336
ACA1_024360	187.078	0.389162	0.137639	2.82742	0.00469253	0.010135
ACA1_024370	0.310322	0.0294906	0.313984	0.0939238	0.92517	NA
ACA1_024380	3146.44	-1.09989	0.145664	-7.55082	4.32537e-14	6.53691e-13
ACA1_024390	356.287	-0.0442023	0.123569	-0.357714	0.720557	0.779529
ACA1_024400	147.095	-0.573427	0.418921	-1.36882	0.171056	0.238966
ACA1_024410	2423.25	-0.422297	0.127429	-3.31398	0.000919777	0.0023487
ACA1_024420	149.096	-0.124767	0.165331	-0.75465	0.450459	0.534075
ACA1_024430	76.5054	0.308074	0.395257	0.779428	0.435728	0.519808
ACA1_024630	391.952	0.264959	0.106851	2.47971	0.0131488	0.0254725
ACA1_024640	155.09	-0.506827	0.192505	-2.6328	0.00846848	0.0171964
ACA1_024750	18.9264	-0.41911	0.365845	-1.1456	0.251963	0.331032
ACA1_024960	610.084	-0.268682	0.12408	-2.16539	0.0303577	0.0534953
ACA1_024970	3.82729	0.0698322	0.564162	0.12378	0.901489	0.928083
ACA1_024980	362.895	0.396715	0.200902	1.97467	0.0483057	0.0805261
ACA1_024990	3.0523	-0.894087	0.556455	-1.60676	0.108108	0.161876
ACA1_025000	570.692	-0.910154	0.161445	-5.63754	1.72499e-08	1.09071e-07
ACA1_025200	72.4107	1.38117	0.285679	4.8347	1.33345e-06	6.05837e-06
ACA1_025410	145.334	0.914192	0.202383	4.51715	6.26775e-06	2.51616e-05
ACA1_025420	663.978	-0.949942	0.250047	-3.79905	0.000145254	0.000442656
ACA1_025520	1691.01	0.0548179	0.218081	0.251365	0.801532	0.847583
ACA1_025530	42.8076	1.0325	0.525183	1.96599	0.0493001	0.0819287
ACA1_025540	864.336	0.944594	0.336388	2.80805	0.00498427	0.0106971
ACA1_025550	41.1375	-0.779698	0.261255	-2.98443	0.00284105	0.00647436
ACA1_025560	125.583	-1.71719	0.538085	-3.19129	0.00141638	0.00346025
ACA1_025570	2031.12	-0.270653	0.186052	-1.45472	0.145748	0.208575
ACA1_025670	799.816	-0.186812	0.198793	-0.939731	0.347356	0.432824
ACA1_025680	557.643	0.6063	0.138869	4.36597	1.26559e-05	4.81951e-05
ACA1_025690	7407.17	-0.560054	0.22107	-2.53338	0.0112968	0.0222608
ACA1_025700	59.9486	1.2178	0.272095	4.47565	7.61794e-06	3.02623e-05
ACA1_025710	113.818	-0.458489	0.144145	-3.18075	0.00146897	0.00357782
ACA1_025720	163.514	0.170188	0.142837	1.19148	0.233465	0.310341
ACA1_025730	2311.66	-0.626888	0.15243	-4.11262	3.91192e-05	0.00013502
ACA1_025830	6.46606	2.45463	0.562576	4.36319	1.28177e-05	4.87469e-05
ACA1_025840	9.79567	0.743705	0.488715	1.52176	0.12807	0.186678
ACA1_025850	0.156239	-0.179042	0.227988	-0.785311	0.432271	NA
ACA1_025860	0	NA	NA	NA	NA	NA
ACA1_025870	0.126118	0	0.162943	0	1	NA
ACA1_025880	42.3014	0.303828	0.215893	1.40731	0.159336	0.225033
ACA1_025980	344.201	-0.0654392	0.172244	-0.379921	0.704004	0.765403
ACA1_026390	116.482	-0.299563	0.156824	-1.91018	0.0561095	0.0916426
ACA1_026500	295.159	-0.901465	0.214116	-4.21017	2.5518e-05	9.14849e-05
ACA1_026700	620.8	0.00161412	0.112786	0.0143113	0.988582	0.993319
ACA1_026710	1213.45	-0.381221	0.0971613	-3.92359	8.72403e-05	0.000279913
ACA1_026720	1426.3	-0.736827	0.172537	-4.27055	1.94991e-05	7.15579e-05
ACA1_026820	3062.96	0.0239291	0.146461	0.163383	0.870217	0.90433
ACA1_026830	0.100029	0.0839114	0.162681	0.515804	0.605992	NA
ACA1_026840	486.941	0.691558	0.19577	3.53251	0.000411642	0.00113804
ACA1_026850	32.7152	-1.22681	0.313812	-3.90937	9.25371e-05	0.000295008
ACA1_026860	375.389	0.00593224	0.352424	0.0168327	0.98657	0.99191
ACA1_026960	1487.55	0.336734	0.173333	1.9427	0.0520529	0.0858418
ACA1_026970	24.6755	0.101786	0.310227	0.328102	0.742835	0.799349
ACA1_026980	209.7	-2.16525	0.422511	-5.12472	2.9798e-07	1.53593e-06
ACA1_026990	1893.83	0.554107	0.500945	1.10612	0.268673	0.349145
ACA1_027000	660.156	-0.248973	0.129754	-1.91881	0.0550086	0.0901195
ACA1_027010	262.609	0.410158	0.139071	2.94927	0.00318526	0.00717839
ACA1_027020	466.21	0.732928	0.511334	1.43336	0.151754	0.215972
ACA1_027030	341.823	-0.279911	0.163684	-1.71006	0.0872543	0.1348
ACA1_027040	257.239	-0.0343832	0.119647	-0.287373	0.773827	0.825111
ACA1_027050	380.831	0.453067	0.148948	3.04178	0.00235183	0.00546026
ACA1_027150	65.4871	-0.372837	0.211567	-1.76227	0.0780243	0.122426
ACA1_027160	784.8	0.428178	0.131019	3.26806	0.00108289	0.00271669
ACA1_027270	231.343	-0.0628074	0.164927	-0.380819	0.703337	0.764909
ACA1_027280	94.0393	0.0975125	0.259926	0.375155	0.707545	0.768097
ACA1_027390	114.435	-2.14697	0.305609	-7.0252	2.13761e-12	2.49067e-11
ACA1_027490	4157.17	0.687193	0.20448	3.36068	0.000777495	0.00201783
ACA1_027500	834.343	1.57858	0.161306	9.78624	1.29006e-22	5.75272e-21
ACA1_027610	36.8524	-0.36915	0.301141	-1.22584	0.220259	0.29546
ACA1_027620	143.199	-1.91359	0.551435	-3.47019	0.000520084	0.00140636
ACA1_027630	381.957	-0.222769	0.126434	-1.76194	0.0780792	0.122459
ACA1_027730	28.2543	-0.715633	0.271176	-2.639	0.00831513	0.0169238
ACA1_027740	466.239	1.09201	0.187472	5.82493	5.71374e-09	3.91242e-08
ACA1_027750	785.603	-0.177243	0.103723	-1.70882	0.0874847	0.135084
ACA1_027760	1.2006	-0.106605	0.565784	-0.188421	0.850547	0.888683
ACA1_027770	110.034	0.591999	0.287087	2.06209	0.0391991	0.066976
ACA1_027780	1595.24	-0.0753545	0.155865	-0.48346	0.628769	0.699665
ACA1_027790	247.289	-2.29814	0.273485	-8.40315	4.34669e-17	9.76687e-16
ACA1_027800	220.595	0.492387	0.132664	3.71154	0.000206004	0.000609338
ACA1_027810	211.895	-0.0496101	0.132197	-0.375274	0.707457	0.76806
ACA1_027820	0.614591	-0.610479	0.556603	-1.09679	0.272732	0.353496
ACA1_027830	649.896	-0.939816	0.223195	-4.21074	2.54537e-05	9.12996e-05
ACA1_027840	452.532	1.07814	0.119478	9.02368	1.81871e-19	5.47431e-18
ACA1_027940	512.699	0.449612	0.229986	1.95496	0.0505879	0.0837604
ACA1_028150	269.883	-0.046021	0.152533	-0.301712	0.762871	0.816136
ACA1_028160	1321.27	-0.637714	0.201755	-3.16084	0.00157314	0.00381227
ACA1_028170	16.7288	0.768552	0.43292	1.77527	0.075853	0.119499
ACA1_028180	2.74697	-0.758532	0.520298	-1.45788	0.144874	0.207611
ACA1_028190	99.6778	-2.01179	0.475649	-4.22957	2.34134e-05	8.45269e-05
ACA1_028300	380.217	-0.557386	0.112981	-4.93343	8.07981e-07	3.8287e-06
ACA1_028310	75.3205	-0.640482	0.169331	-3.78242	0.000155312	0.000470924
ACA1_028520	31.5133	-0.56582	0.319321	-1.77195	0.0764029	0.120247
ACA1_028530	356.859	-0.316004	0.110532	-2.85894	0.00425056	0.00929078
ACA1_028540	1074.98	1.21228	0.111104	10.9112	1.0186e-27	7.99819e-26
ACA1_028550	169.222	-0.884103	0.239814	-3.68661	0.000227257	0.000664413
ACA1_028650	406.038	0.486729	0.0952407	5.11051	3.21288e-07	1.64726e-06
ACA1_028660	249.628	1.48123	0.275484	5.37685	7.58002e-08	4.30488e-07
ACA1_028670	5385.34	-0.229401	0.129962	-1.76514	0.0775399	0.121733
ACA1_028680	358.097	-0.532276	0.189901	-2.80291	0.00506432	0.0108447
ACA1_028690	138.609	0.683685	0.321867	2.12412	0.0336598	0.0586135
ACA1_028700	526.652	-0.566149	0.173441	-3.26421	0.00109768	0.00274906
ACA1_028710	0.177245	-0.203739	0.165499	-1.23106	0.218301	NA
ACA1_028720	353.712	0.204904	0.159456	1.28502	0.198785	0.271306
ACA1_028730	206.165	-0.107266	0.253911	-0.422456	0.672693	0.737829
ACA1_028740	165.528	0.267117	0.134945	1.97945	0.0477656	0.0797363
ACA1_028850	12.3557	-0.459431	0.411325	-1.11695	0.264015	0.344454
ACA1_028960	28.4949	0.4248	0.264002	1.60908	0.107599	0.161298
ACA1_029360	1.14091	0.643735	0.57427	1.12096	0.262304	0.342531
ACA1_029370	41.2329	0.914278	0.249799	3.66005	0.000252165	0.000728511
ACA1_029380	163.699	0.424686	0.127794	3.32322	0.00088986	0.00228077
ACA1_029390	283.084	0.00618422	0.109133	0.0566668	0.954811	0.967534
ACA1_029400	204.103	0.984776	0.129159	7.6245	2.44986e-14	3.83484e-13
ACA1_029410	196.728	0.00331692	0.197841	0.0167656	0.986624	0.99191
ACA1_029510	375.275	-0.535706	0.139954	-3.82774	0.000129327	0.000399001
ACA1_029520	301.195	-1.70766	0.206306	-8.27734	1.25958e-16	2.70408e-15
ACA1_029530	218.074	-0.732668	0.15448	-4.74281	2.1077e-06	9.25032e-06
ACA1_029640	98.1842	0.881807	0.26759	3.29536	0.000982943	0.00248844
ACA1_029840	83.8289	1.28272	0.204187	6.28209	3.34047e-10	2.82902e-09
ACA1_030050	25.3269	-1.76784	0.280937	-6.29265	3.12085e-10	2.66175e-09
ACA1_030060	9.43524	-1.03333	0.494861	-2.08813	0.0367863	0.0634234
ACA1_030070	10.5291	-2.06531	0.38549	-5.35762	8.43272e-08	4.74809e-07
ACA1_030080	107.23	-2.36425	0.231572	-10.2096	1.79644e-24	9.9827e-23
ACA1_030090	966.967	0.887812	0.15671	5.66533	1.46742e-08	9.41441e-08
ACA1_030200	0.568276	0.0603979	0.43229	0.139716	0.888884	0.919035
ACA1_030210	0.261561	-0.151418	0.298459	-0.507334	0.611921	NA
ACA1_030220	133.12	1.02056	0.175494	5.81537	6.05013e-09	4.12517e-08
ACA1_030720	195.614	-1.2179	0.242557	-5.02107	5.13834e-07	2.52943e-06
ACA1_030730	480.563	0.484142	0.133454	3.62777	0.000285875	0.000817401
ACA1_030740	621.863	0.681159	0.0995859	6.83992	7.92372e-12	8.38696e-11
ACA1_030750	127.907	0.768296	0.212277	3.61932	0.000295382	0.000841586
ACA1_030760	1018.86	-0.683695	0.131938	-5.18196	2.19567e-07	1.16074e-06
ACA1_030770	22.0769	0.167714	0.322719	0.519691	0.603279	0.676985
ACA1_030780	419.267	0.618447	0.366101	1.68928	0.0911655	0.13991
ACA1_030790	86.6185	1.93846	0.251511	7.70725	1.28562e-14	2.08704e-13
ACA1_030800	851.975	-0.900414	0.156487	-5.75394	8.71885e-09	5.75994e-08
ACA1_030810	1.6332	-0.912657	0.569454	-1.60269	0.109003	0.163031
ACA1_031010	78.003	0.494009	0.188334	2.62304	0.00871478	0.0176321
ACA1_031020	2.62631	-0.229213	0.548917	-0.417574	0.676259	0.740589
ACA1_031130	0	NA	NA	NA	NA	NA
ACA1_031140	118.568	0.621525	0.452531	1.37344	0.169615	0.237346
ACA1_031150	0	NA	NA	NA	NA	NA
ACA1_031160	57.6963	-1.44652	0.251557	-5.75025	8.91142e-09	5.88178e-08
ACA1_031270	433.895	2.17197	0.372805	5.82602	5.67656e-09	3.89435e-08
ACA1_031380	1.63924	0.428704	0.564054	0.760041	0.44723	0.530987
ACA1_031390	144.063	0.428878	0.137598	3.11689	0.00182767	0.00436322
ACA1_031400	74.2006	-1.59193	0.293606	-5.42199	5.89387e-08	3.40891e-07
ACA1_031410	81.3418	-0.375217	0.328565	-1.14199	0.253459	0.332786
ACA1_031510	88.3775	-0.923992	0.165092	-5.59683	2.18312e-08	1.35488e-07
ACA1_031520	110.159	0.506572	0.21872	2.31608	0.0205541	0.0379411
ACA1_031530	38.3625	-1.84534	0.464796	-3.97023	7.18047e-05	0.00023429
ACA1_031540	959.001	-3.17424	0.503837	-6.30013	2.9739e-10	2.54694e-09
ACA1_031550	351.228	0.18576	0.243831	0.761841	0.446155	0.530059
ACA1_031560	42.6176	0.426865	0.302325	1.41194	0.157968	0.223341
ACA1_031570	479.054	-1.58333	0.31832	-4.97403	6.55765e-07	3.17085e-06
ACA1_031580	149.233	-1.38516	0.509781	-2.71717	0.00658437	0.0137333
ACA1_031590	254.639	-1.47732	0.538581	-2.74299	0.00608829	0.0128134
ACA1_031600	537.583	0.0975994	0.115849	0.842474	0.399523	0.484378
ACA1_031610	345.562	1.5641	0.147793	10.583	3.57237e-26	2.38952e-24
ACA1_031620	549.324	-0.526131	0.090811	-5.79369	6.8857e-09	4.63366e-08
ACA1_031630	74.0331	1.02685	0.2327	4.41274	1.02071e-05	3.96539e-05
ACA1_031640	338.174	0.830762	0.12911	6.43454	1.23846e-10	1.11346e-09
ACA1_031650	99.0316	0.238973	0.268681	0.88943	0.373772	0.459345
ACA1_031660	3897.59	-0.0896061	0.15058	-0.595074	0.551794	0.629775
ACA1_031670	213.282	0.311309	0.194164	1.60333	0.108862	0.162853
ACA1_031680	45.3417	0.956877	0.228252	4.1922	2.76262e-05	9.83355e-05
ACA1_031780	181.806	-1.12493	0.375073	-2.99924	0.00270651	0.00619612
ACA1_031790	243.572	-0.0615075	0.166572	-0.369255	0.711938	0.771938
ACA1_031800	238.439	0.501053	0.305885	1.63804	0.101413	0.153409
ACA1_031810	0.125245	0	0.162671	0	1	NA
ACA1_031820	93.4016	0.177043	0.17259	1.0258	0.304986	0.388335
ACA1_031830	61.0325	0.574363	0.215134	2.66979	0.00758993	0.0156077
ACA1_031840	0.923083	-1.0327	0.566102	-1.82423	0.0681178	0.108736
ACA1_031850	1026.28	0.565968	0.13392	4.22617	2.37701e-05	8.57075e-05
ACA1_031860	133.788	0.0327152	0.127109	0.25738	0.796886	0.843906
ACA1_031870	402.417	0.567502	0.252047	2.25157	0.0243493	0.0439165
ACA1_031880	6.2644	1.00336	0.54563	1.83889	0.0659307	0.105665
ACA1_031890	5.30844	2.18568	0.574762	3.80276	0.000143092	0.000436896
ACA1_031900	2650.93	-0.333301	0.33855	-0.984494	0.324873	0.409328
ACA1_031910	69.4932	-0.389865	0.221481	-1.76026	0.0783631	0.122797
ACA1_031920	83.9714	-0.807222	0.234821	-3.43761	0.000586873	0.0015647
ACA1_031930	136.722	-0.4567	0.141625	-3.22472	0.00126097	0.00311779
ACA1_031940	636.383	-0.92563	0.239433	-3.86592	0.000110671	0.000346964
ACA1_031950	496.327	-2.61069	0.48392	-5.39488	6.85703e-08	3.91892e-07
ACA1_031960	464.627	1.40122	0.14933	9.38343	6.38602e-21	2.27254e-19
ACA1_031970	6.41054	0.32625	0.49331	0.661349	0.508389	0.589929
ACA1_031980	246.044	-0.284289	0.230562	-1.23303	0.217566	0.292517
ACA1_031990	114.218	-0.811841	0.299522	-2.71045	0.00671915	0.0139802
ACA1_032000	2916.69	0.219177	0.0935151	2.34376	0.0190903	0.0355343
ACA1_032200	0.621282	0.23283	0.430814	0.540443	0.588892	0.663881
ACA1_032210	6.40565	-1.0403	0.460354	-2.25979	0.0238341	0.0431049
ACA1_032320	51.0244	-0.0450711	0.234256	-0.192401	0.847428	0.886257
ACA1_032330	20.9096	0.376237	0.321262	1.17112	0.24155	0.319413
ACA1_032430	574.653	0.737778	0.166934	4.41958	9.88909e-06	3.84804e-05
ACA1_032840	411.428	0.819144	0.198426	4.12821	3.65597e-05	0.000127158
ACA1_033140	29.6215	-0.942676	0.319998	-2.94588	0.00322035	0.00724843
ACA1_033250	5.57126	-1.59905	0.524115	-3.05096	0.00228112	0.00531576
ACA1_033360	117.808	0.512157	0.138064	3.70957	0.000207608	0.000613024
ACA1_033370	4.28538	0.52272	0.563847	0.92706	0.353895	0.43923
ACA1_033380	109.905	-0.716355	0.300595	-2.38312	0.0171667	0.03233
ACA1_033390	175.434	-0.862768	0.195335	-4.41685	1.00148e-05	3.89486e-05
ACA1_033400	281.192	-0.96755	0.186879	-5.1774	2.24996e-07	1.18467e-06
ACA1_033410	87.4746	-0.882472	0.190984	-4.62065	3.82541e-06	1.60055e-05
ACA1_033420	31.039	-0.897055	0.290181	-3.09137	0.00199236	0.00470508
ACA1_033430	315.974	0.216983	0.168756	1.28578	0.198518	0.271045
ACA1_033440	49.1179	0.574128	0.202782	2.83126	0.00463649	0.0100304
ACA1_033450	336.143	0.833528	0.137736	6.05162	1.43397e-09	1.09272e-08
ACA1_033460	24.8718	1.00014	0.296557	3.3725	0.00074489	0.0019412
ACA1_033470	19.698	0.545302	0.40012	1.36285	0.172931	0.241099
ACA1_033480	288.002	0.969584	0.13368	7.25303	4.07563e-13	5.34829e-12
ACA1_033490	4.6858	-0.324322	0.501962	-0.64611	0.518208	0.599045
ACA1_033500	592.059	1.21774	0.160149	7.60375	2.87671e-14	4.45474e-13
ACA1_033510	161.092	1.09603	0.211573	5.18037	2.21444e-07	1.1681e-06
ACA1_033520	0.38404	0.0417994	0.423262	0.0987554	0.921333	NA
ACA1_033530	0	NA	NA	NA	NA	NA
ACA1_033540	497.551	0.372916	0.26828	1.39003	0.164521	0.231151
ACA1_033550	784.939	-0.418637	0.104703	-3.99833	6.37917e-05	0.000210955
ACA1_033560	87.7274	0.30855	0.302894	1.01867	0.308359	0.391938
ACA1_033570	995.45	0.0868766	0.123072	0.7059	0.48025	0.563065
ACA1_033580	6.80199	-0.891512	0.455773	-1.95604	0.05046	0.0835871
ACA1_033590	1328.39	-0.526894	0.204306	-2.57894	0.00991031	0.0198179
ACA1_033600	180.117	-0.486642	0.282743	-1.72115	0.0852243	0.132059
ACA1_033610	2243.39	0.551083	0.0827889	6.65649	2.80447e-11	2.75265e-10
ACA1_033620	1.02827	0.870704	0.542887	1.60384	0.108749	0.162735
ACA1_033630	293.725	0.420908	0.144455	2.91376	0.00357106	0.00795233
ACA1_033640	431.815	-0.620017	0.125278	-4.94912	7.45507e-07	3.56659e-06
ACA1_033650	0	NA	NA	NA	NA	NA
ACA1_033660	323.184	-1.08145	0.121905	-8.87126	7.23229e-19	2.03688e-17
ACA1_033670	711.804	0.813704	0.162279	5.01422	5.32488e-07	2.61235e-06
ACA1_033680	0.0647552	0	0.159985	0	1	NA
ACA1_033690	2.24619	2.81981	0.558422	5.0496	4.42725e-07	2.20645e-06
ACA1_033700	3.49866	1.93196	0.57431	3.36397	0.000768312	0.00199722
ACA1_033710	18705	-1.05235	0.189592	-5.55058	2.84723e-08	1.735e-07
ACA1_033720	1152.02	-0.202245	0.111814	-1.80876	0.0704882	0.112074
ACA1_033730	482.101	0.47767	0.158354	3.01646	0.00255744	0.00588749
ACA1_033740	57.2051	-0.205011	0.314867	-0.651105	0.514979	0.596092
ACA1_033750	1656.4	-1.45054	0.290886	-4.98663	6.14422e-07	2.98292e-06
ACA1_033760	562.142	-0.307669	0.41195	-0.746859	0.455149	0.53875
ACA1_033770	553.764	0.599627	0.144614	4.14639	3.37763e-05	0.000118188
ACA1_033780	102.181	0.0769392	0.158936	0.484091	0.628322	0.699221
ACA1_033790	0	NA	NA	NA	NA	NA
ACA1_033890	25.4729	0.821263	0.318862	2.57561	0.0100064	0.0199852
ACA1_033900	15.0397	-0.67417	0.399845	-1.68608	0.0917804	0.140681
ACA1_033910	78.4265	0.866189	0.263129	3.29188	0.000995211	0.00251598
ACA1_034020	43.8505	-0.0243274	0.227998	-0.1067	0.915027	0.937544
ACA1_034030	463.139	0.0745246	0.140703	0.529661	0.596347	0.670612
ACA1_034040	102.228	0.799421	0.170407	4.69125	2.71539e-06	1.16623e-05
ACA1_034050	182.918	0.0237272	0.288493	0.0822454	0.934452	0.952949
ACA1_034060	36.2718	0.799866	0.254858	3.13848	0.00169828	0.00409083
ACA1_034070	186.931	0.699579	0.141382	4.94813	7.49282e-07	3.58109e-06
ACA1_034080	867.742	1.10722	0.103948	10.6517	1.71208e-26	1.17791e-24
ACA1_034090	1966.23	0.793398	0.108942	7.28279	3.26987e-13	4.37031e-12
ACA1_034100	7.53434	1.63027	0.538141	3.02944	0.00245007	0.0056683
ACA1_034110	262.972	0.250774	0.219024	1.14496	0.252224	0.331285
ACA1_034120	285.179	-0.238122	0.154395	-1.54229	0.123003	0.180455
ACA1_034130	57.1636	-0.531668	0.369776	-1.43781	0.150487	0.214422
ACA1_034140	16.0133	-0.537791	0.352209	-1.52691	0.126784	0.185214
ACA1_034150	247.023	0.450702	0.126176	3.57202	0.000354235	0.000991089
ACA1_034160	684.544	-0.0306727	0.195469	-0.156918	0.875309	0.90838
ACA1_034170	3927.21	0.374011	0.113309	3.30082	0.000964021	0.00244563
ACA1_034180	13.6996	-1.08852	0.411393	-2.64593	0.00814656	0.0166161
ACA1_034280	1467.36	0.0269637	0.0858217	0.314183	0.753382	0.808502
ACA1_034290	201.06	-0.201599	0.234708	-0.858933	0.390377	0.475563
ACA1_034300	312.525	0.223048	0.143172	1.55791	0.119255	0.175798
ACA1_034310	1193.55	0.351185	0.178405	1.96847	0.0490138	0.0815185
ACA1_034320	80.9312	0.84011	0.361743	2.32239	0.0202118	0.037381
ACA1_034330	44.5723	0.0377026	0.256591	0.146937	0.883182	0.914711
ACA1_034340	0.740197	-0.868796	0.537259	-1.61709	0.105859	0.159202
ACA1_034350	776.232	0.642843	0.0858428	7.48862	6.96038e-14	1.01375e-12
ACA1_034460	85.9896	-0.000237223	0.200399	-0.00118375	0.999056	0.999886
ACA1_034470	88.4064	-0.239993	0.32299	-0.743036	0.45746	0.541043
ACA1_034480	340.534	-1.15214	0.186968	-6.16222	7.17307e-10	5.72261e-09
ACA1_034490	114.035	-0.0520308	0.180059	-0.288966	0.772608	0.824042
ACA1_034500	52.7984	-0.368314	0.255087	-1.44388	0.148773	0.212273
ACA1_034510	4784.8	0.144103	0.0835519	1.72471	0.084579	0.131279
ACA1_034520	178.486	0.616582	0.27238	2.26368	0.0235938	0.0427119
ACA1_034530	139.071	0.628492	0.183881	3.41793	0.000630985	0.00167029
ACA1_034540	11396.7	-0.749744	0.149254	-5.02326	5.08007e-07	2.50245e-06
ACA1_034550	7728.34	-0.863593	0.139003	-6.21275	5.20663e-10	4.27903e-09
ACA1_034560	393.57	0.195199	0.227579	0.857718	0.391048	0.476067
ACA1_034570	407.804	0.0809463	0.146292	0.553322	0.580043	0.655748
ACA1_034580	224.319	0.731491	0.15606	4.68724	2.76909e-06	1.18753e-05
ACA1_034590	423.281	-0.627742	0.364877	-1.72042	0.0853563	0.13225
ACA1_034600	173.708	1.21076	0.146264	8.2779	1.25365e-16	2.69534e-15
ACA1_034610	2607.94	-1.10822	0.131319	-8.43912	3.1973e-17	7.35583e-16
ACA1_034720	336.839	-0.942649	0.135427	-6.96059	3.38856e-12	3.81782e-11
ACA1_034930	5.13864	-0.450411	0.497139	-0.906006	0.364933	0.450376
ACA1_035040	50.3878	-0.287398	0.282245	-1.01826	0.308555	0.392119
ACA1_035240	56.3655	-1.21614	0.253817	-4.79143	1.65599e-06	7.41196e-06
ACA1_035250	40.0537	0.407882	0.286903	1.42167	0.155122	0.220136
ACA1_035260	1065.49	0.34781	0.0878729	3.95811	7.55465e-05	0.00024528
ACA1_035270	3.4005	-1.52008	0.504035	-3.01583	0.00256277	0.00589695
ACA1_035280	120.354	-0.25095	0.146747	-1.71008	0.087251	0.1348
ACA1_035290	35.6304	-0.229739	0.299297	-0.767594	0.442729	0.526737
ACA1_035300	190.183	-2.00118	0.310968	-6.43531	1.23221e-10	1.10853e-09
ACA1_035310	500.093	-0.523102	0.168449	-3.1054	0.00190025	0.00451411
ACA1_035320	0.324322	-0.116392	0.383005	-0.303891	0.761211	NA
ACA1_035330	152.297	1.234	0.180344	6.84248	7.78322e-12	8.25032e-11
ACA1_035340	3181.75	0.414013	0.155341	2.66519	0.0076944	0.0158022
ACA1_035350	579.926	0.10886	0.0845758	1.28713	0.198049	0.270506
ACA1_035360	9097.3	-1.7664	0.183652	-9.6182	6.69913e-22	2.77332e-20
ACA1_035370	283.464	0.388853	0.14152	2.74769	0.0060017	0.0126551
ACA1_035380	639.818	0.76195	0.13511	5.63947	1.70579e-08	1.07999e-07
ACA1_035390	186.006	0.259082	0.181376	1.42842	0.15317	0.217686
ACA1_035400	211.649	0.833963	0.219586	3.79788	0.000145936	0.000444547
ACA1_035410	33.2959	2.03521	0.304192	6.69052	2.22372e-11	2.22804e-10
ACA1_035420	982.387	-0.723709	0.320608	-2.2573	0.0239893	0.0433735
ACA1_035430	85.7112	0.342807	0.242372	1.41439	0.157249	0.222606
ACA1_035440	288.391	0.337213	0.125115	2.69523	0.00703404	0.0145599
ACA1_035450	613.183	-0.0682248	0.213147	-0.320083	0.748905	0.804594
ACA1_035460	354.558	-0.268143	0.240676	-1.11412	0.265227	0.345754
ACA1_035470	1410.07	-0.36675	0.0990614	-3.70225	0.000213699	0.000628568
ACA1_035480	153.231	0.522853	0.136873	3.82	0.000133453	0.000410413
ACA1_035490	1105.23	0.21518	0.163688	1.31458	0.188653	0.259388
ACA1_035500	0	NA	NA	NA	NA	NA
ACA1_035510	345.165	-0.45753	0.0888784	-5.14782	2.63536e-07	1.37122e-06
ACA1_035520	2843	-0.961122	0.179196	-5.36353	8.16104e-08	4.60589e-07
ACA1_035530	460.36	-0.777396	0.100876	-7.70647	1.29345e-14	2.09739e-13
ACA1_035540	0.301556	-0.626212	0.459655	-1.36235	0.173087	NA
ACA1_035550	77.1528	0.132443	0.264374	0.500968	0.616393	0.688652
ACA1_035560	1037.1	0.331587	0.10562	3.13945	0.00169266	0.00407866
ACA1_035570	540.903	0.695225	0.136183	5.10506	3.30682e-07	1.69175e-06
ACA1_035580	110.802	-0.224562	0.204332	-1.09901	0.271765	0.352433
ACA1_035590	676.21	-0.317826	0.277348	-1.14595	0.251818	0.330871
ACA1_035600	35.0599	-0.262306	0.264539	-0.991561	0.321412	0.405604
ACA1_035610	10.3624	-0.82359	0.428888	-1.92029	0.0548208	0.0898628
ACA1_035620	3.2304	-1.09871	0.561469	-1.95685	0.0503646	0.0834482
ACA1_035630	293.285	0.0809159	0.127828	0.633006	0.52673	0.60668
ACA1_035640	595.715	5.45792	0.362163	15.0703	2.53813e-51	1.83355e-48
ACA1_035650	611.721	0.0180472	0.084897	0.212578	0.831656	0.872795
ACA1_035660	382.859	0.3835	0.115506	3.32016	0.000899648	0.00230422
ACA1_035770	0.199294	0.0518471	0.405216	0.127949	0.898189	NA
ACA1_035780	2.1338	-0.0778607	0.557761	-0.139595	0.88898	0.919035
ACA1_035790	34.4406	-0.846776	0.318437	-2.65916	0.00783351	0.016056
ACA1_035890	24.9979	0.150743	0.270457	0.557365	0.577278	0.653134
ACA1_036000	198.13	-0.255572	0.20421	-1.25152	0.210746	0.284913
ACA1_036010	175.485	-0.307916	0.149031	-2.06611	0.0388176	0.0663713
ACA1_036020	194.084	2.00767	0.283675	7.07734	1.46944e-12	1.76041e-11
ACA1_036030	759.337	0.113707	0.196477	0.57873	0.562772	0.639726
ACA1_036040	14418.8	-1.19857	0.155562	-7.70474	1.31108e-14	2.1236e-13
ACA1_036050	77.6025	-0.156092	0.181416	-0.860411	0.389563	0.47485
ACA1_036060	112.479	1.1139	0.181123	6.14999	7.74864e-10	6.1411e-09
ACA1_036170	174.237	0.352357	0.113657	3.10019	0.00193398	0.00458445
ACA1_036180	103.752	-0.0422737	0.328544	-0.12867	0.897619	0.92505
ACA1_036190	275.066	1.1368	0.164062	6.92909	4.23551e-12	4.69644e-11
ACA1_036200	0	NA	NA	NA	NA	NA
ACA1_036210	74.7187	0.478087	0.172465	2.77208	0.00556992	0.011824
ACA1_036220	231.573	-0.440154	0.154721	-2.84483	0.0044435	0.00964974
ACA1_036230	98.0105	0.395102	0.166775	2.36907	0.0178331	0.0334744
ACA1_036240	904.19	-1.39827	0.283394	-4.934	8.0563e-07	3.81881e-06
ACA1_036250	323.337	-1.27041	0.258823	-4.90843	9.18107e-07	4.29421e-06
ACA1_036260	2621.89	-1.50641	0.174491	-8.63317	5.96739e-18	1.50203e-16
ACA1_036270	472.786	0.264602	0.167317	1.58144	0.113777	0.169156
ACA1_036280	6155.5	-1.57958	0.222962	-7.08455	1.395e-12	1.67819e-11
ACA1_036290	106.062	-0.742274	0.173773	-4.27151	1.94155e-05	7.13053e-05
ACA1_036300	51.76	-0.949187	0.23978	-3.95857	7.53997e-05	0.000244858
ACA1_036310	114.781	0.555054	0.219872	2.52444	0.0115884	0.0227484
ACA1_036320	184.326	0.581194	0.250537	2.31979	0.020352	0.0376162
ACA1_036330	925.892	0.0941295	0.0962909	0.977553	0.328295	0.412632
ACA1_036340	1423.74	0.580916	0.108632	5.34755	8.91535e-08	4.99453e-07
ACA1_036350	10.5373	0.248027	0.386179	0.642258	0.520705	0.601371
ACA1_036360	776.768	-1.01774	0.119804	-8.49505	1.97851e-17	4.67083e-16
ACA1_036370	14.1567	-0.315466	0.395191	-0.79826	0.424719	0.509452
ACA1_036380	1.13778	-1.49996	0.56501	-2.65475	0.0079368	0.0162446
ACA1_036390	58.9445	-0.667495	0.260136	-2.56595	0.0102894	0.0204768
ACA1_036400	9134.64	-1.52551	0.202587	-7.53015	5.06822e-14	7.58029e-13
ACA1_036410	0.0211578	0	0.15737	0	1	NA
ACA1_036420	7673.28	-1.37811	0.197418	-6.98067	2.93766e-12	3.33412e-11
ACA1_036430	186.118	0.534294	0.166997	3.19942	0.00137705	0.00337671
ACA1_036440	60.694	0.848409	0.240437	3.52861	0.000417743	0.0011538
ACA1_036450	5.14624	0.353779	0.438085	0.807559	0.419344	0.504512
ACA1_036460	0.0420499	0	0.156099	0	1	NA
ACA1_036470	72.1861	1.55932	0.183715	8.4877	2.1077e-17	4.9677e-16
ACA1_036480	47.5602	0.270611	0.252871	1.07015	0.28455	0.365926
ACA1_036490	488.158	0.214544	0.136555	1.57111	0.116157	0.171915
ACA1_036500	105.024	0.0105764	0.18245	0.0579689	0.953773	0.966822
ACA1_036510	119.295	-1.31536	0.283832	-4.63427	3.58192e-06	1.5066e-05
ACA1_036520	841.691	-0.106649	0.0926154	-1.15152	0.249518	0.328508
ACA1_036530	512.341	0.122965	0.51384	0.239307	0.810868	0.855702
ACA1_036540	0	NA	NA	NA	NA	NA
ACA1_036550	0	NA	NA	NA	NA	NA
ACA1_036560	452.029	-0.393019	0.229808	-1.71021	0.0872279	0.134788
ACA1_036570	0	NA	NA	NA	NA	NA
ACA1_036580	0	NA	NA	NA	NA	NA
ACA1_036590	0.16804	-0.112164	0.235184	-0.476921	0.633419	NA
ACA1_036600	357.486	-0.684297	0.22843	-2.99565	0.00273859	0.00626261
ACA1_036610	109.29	0.249234	0.155838	1.59932	0.10975	0.163932
ACA1_036620	576.747	-0.230495	0.183256	-1.25778	0.208472	0.282155
ACA1_036630	68.0293	-0.330306	0.246449	-1.34026	0.18016	0.249517
ACA1_036640	149.856	0.493148	0.148211	3.32734	0.000876798	0.00225048
ACA1_036650	132.615	-0.0230223	0.172693	-0.133313	0.893946	0.922223
ACA1_036660	247.002	-0.12006	0.113722	-1.05573	0.29109	0.373174
ACA1_036670	257.022	1.44106	0.184042	7.83005	4.87677e-15	8.36812e-14
ACA1_036870	67.104	0.375017	0.284598	1.31771	0.187601	0.25809
ACA1_036880	213.606	-0.722786	0.12224	-5.91286	3.36223e-09	2.41559e-08
ACA1_036890	130.394	0.264739	0.130209	2.03318	0.0420344	0.0712141
ACA1_036900	6866.37	-1.48504	0.115062	-12.9064	4.14084e-38	8.92937e-36
ACA1_036910	202.468	1.47439	0.257598	5.72362	1.04278e-08	6.81109e-08
ACA1_036920	716.374	-1.37683	0.17509	-7.86358	3.73302e-15	6.49815e-14
ACA1_036930	275.292	1.56541	0.194322	8.05573	7.90041e-16	1.50986e-14
ACA1_036940	443.022	0.412083	0.253976	1.62253	0.10469	0.157712
ACA1_036950	848.082	0.397585	0.285519	1.3925	0.163771	0.230306
ACA1_036960	733.766	0.0114884	0.091371	0.125734	0.899943	0.926887
ACA1_036970	96.6249	0.270952	0.148698	1.82216	0.0684307	0.109194
ACA1_036980	97.8713	0.257369	0.229462	1.12162	0.262025	0.342229
ACA1_036990	2500.11	-0.0700971	0.102266	-0.685441	0.493066	0.575569
ACA1_037000	439.099	0.525312	0.172841	3.03927	0.00237149	0.00550061
ACA1_037010	1804.77	-0.845105	0.219915	-3.84288	0.0001216	0.000377661
ACA1_037020	1885.45	-0.831284	0.211054	-3.93873	8.19148e-05	0.000264293
ACA1_037030	116.784	0.0753105	0.148809	0.506088	0.612795	0.685533
ACA1_037040	2.38321	-0.0388306	0.517169	-0.075083	0.940149	0.957377
ACA1_037050	31.8647	0.0949118	0.337197	0.281473	0.778347	0.82883
ACA1_037060	172.625	-0.720867	0.154582	-4.66335	3.11109e-06	1.32359e-05
ACA1_037070	503.933	-0.495625	0.173879	-2.8504	0.00436644	0.00950669
ACA1_037080	2210.49	-0.437752	0.13877	-3.15451	0.00160769	0.00388881
ACA1_037090	464.286	0.986731	0.155386	6.35017	2.15071e-10	1.87302e-09
ACA1_037100	475.565	-0.443303	0.180271	-2.45909	0.0139289	0.026829
ACA1_037110	1789.52	-0.322646	0.282298	-1.14293	0.253069	0.332303
ACA1_037120	412.93	0.421439	0.13204	3.19176	0.00141408	0.00345522
ACA1_037130	245.123	1.88349	0.160927	11.704	1.21559e-31	1.3829e-29
ACA1_037140	113.94	1.6456	0.174613	9.42426	4.33163e-21	1.57641e-19
ACA1_037150	155.072	-0.575532	0.202972	-2.83552	0.00457507	0.00990865
ACA1_037160	554.716	0.0952537	0.111582	0.853665	0.393291	0.478386
ACA1_037170	145.775	0.244305	0.167194	1.46121	0.143958	0.206483
ACA1_037180	72.6533	0.639619	0.155368	4.11679	3.84183e-05	0.000132982
ACA1_037190	545.401	-0.225149	0.149672	-1.50429	0.132507	0.19233
ACA1_037200	624.455	-0.327301	0.118998	-2.75047	0.00595096	0.0125628
ACA1_037210	123.637	-1.01075	0.236314	-4.27713	1.89317e-05	6.96881e-05
ACA1_037220	28.0741	-0.564243	0.264365	-2.13433	0.0328155	0.0573577
ACA1_037430	151.807	-1.0088	0.188279	-5.35799	8.41535e-08	4.742e-07
ACA1_037440	192.776	-1.15446	0.173883	-6.63927	3.15239e-11	3.07326e-10
ACA1_037450	157.453	-0.963863	0.192756	-5.00044	5.7201e-07	2.78826e-06
ACA1_037460	2248.21	-0.510031	0.126258	-4.0396	5.35429e-05	0.00017957
ACA1_037470	247.536	-0.211429	0.115461	-1.83117	0.0670753	0.107332
ACA1_037480	650.465	-0.407343	0.140701	-2.8951	0.00379036	0.00838383
ACA1_037490	306.293	-0.148176	0.128277	-1.15513	0.248039	0.326798
ACA1_037500	75.4059	1.13269	0.248637	4.5556	5.22367e-06	2.13076e-05
ACA1_037700	1066.32	0.468533	0.117802	3.97728	6.97076e-05	0.00022822
ACA1_037710	17.0939	0.276782	0.339927	0.814241	0.415507	0.500663
ACA1_037720	118.351	-0.137136	0.153758	-0.891891	0.372451	0.45809
ACA1_037730	72.5164	-1.12986	0.493845	-2.28789	0.022144	0.040442
ACA1_037740	538.78	0.366264	0.209495	1.74832	0.0804091	0.125581
ACA1_037750	60.6932	-0.574884	0.18949	-3.03385	0.00241451	0.0055941
ACA1_037760	265.376	-0.484003	0.111871	-4.32646	1.51528e-05	5.6953e-05
ACA1_037770	179.738	-0.304187	0.126352	-2.40745	0.0160641	0.0304387
ACA1_037780	755.65	0.176639	0.0961352	1.8374	0.0661504	0.105981
ACA1_037790	549.844	1.21681	0.172203	7.06613	1.59317e-12	1.90233e-11
ACA1_037800	920.703	0.599397	0.112488	5.32852	9.90142e-08	5.51585e-07
ACA1_037810	30.7157	2.67301	0.50762	5.26578	1.39596e-07	7.61085e-07
ACA1_037820	0.148317	-0.0440237	0.239135	-0.184096	0.853938	NA
ACA1_037830	93.9953	0.066243	0.323865	0.204539	0.837933	0.877915
ACA1_037840	28.6991	-1.10866	0.275668	-4.02172	5.77746e-05	0.000192378
ACA1_037850	8.48069	0.30163	0.399351	0.7553	0.450069	0.5337
ACA1_037860	485.55	1.60974	0.135857	11.8487	2.18472e-32	2.69785e-30
ACA1_037870	675.327	0.279289	0.124043	2.25155	0.0243504	0.0439165
ACA1_037880	19.2161	4.25984	0.476405	8.94164	3.83432e-19	1.12598e-17
ACA1_037890	80.4659	-0.677825	0.290234	-2.33544	0.0195205	0.0362369
ACA1_037900	264.31	0.0422833	0.315937	0.133835	0.893533	0.922061
ACA1_037910	187.009	0.642141	0.133607	4.8062	1.53823e-06	6.92349e-06
ACA1_037920	275.154	-1.47414	0.369175	-3.99305	6.52284e-05	0.00021487
ACA1_037930	899.54	0.402508	0.114531	3.5144	0.000440753	0.00121203
ACA1_037940	138.243	-0.40791	0.313168	-1.30253	0.192737	0.264275
ACA1_038050	98.7525	0.22081	0.200262	1.10261	0.270198	0.350685
ACA1_038060	139.228	-0.483551	0.301372	-1.6045	0.108604	0.162569
ACA1_038070	88.6342	-0.194742	0.295472	-0.659087	0.50984	0.591328
ACA1_038080	633.587	0.147832	0.130849	1.12979	0.258563	0.338472
ACA1_038090	281.554	-0.215349	0.0998277	-2.15721	0.0309893	0.0544621
ACA1_038100	818.975	-0.647147	0.170527	-3.79499	0.000147648	0.000449194
ACA1_038110	126.447	-0.643237	0.164483	-3.91065	9.20471e-05	0.000293511
ACA1_038120	73.437	-0.206739	0.185676	-1.11344	0.265519	0.346011
ACA1_038130	5529.21	-1.18575	0.120619	-9.83054	8.31685e-23	3.79059e-21
ACA1_038140	144.705	-1.13559	0.278447	-4.07831	4.53641e-05	0.000154726
ACA1_038150	216.033	-0.0728576	0.136567	-0.533493	0.593693	0.668147
ACA1_038160	762.247	0.762824	0.149689	5.09605	3.46812e-07	1.76933e-06
ACA1_038170	155.187	0.0327275	0.300727	0.108828	0.913339	0.936412
ACA1_038180	800.624	-0.138463	0.116593	-1.18758	0.235	0.312037
ACA1_038190	164.383	0.38097	0.216529	1.75945	0.0785017	0.122988
ACA1_038200	154.567	0.728145	0.189472	3.84301	0.000121533	0.000377534
ACA1_038210	253.075	0.544661	0.165223	3.29653	0.000978886	0.00247861
ACA1_038220	414.583	0.541497	0.205893	2.63	0.00853858	0.0173169
ACA1_038230	1383.16	-0.359164	0.100285	-3.58143	0.000341717	0.000959038
ACA1_038240	823.224	-0.642197	0.157731	-4.07148	4.67161e-05	0.000158738
ACA1_038250	54.3208	0.489193	0.190492	2.56805	0.0102271	0.0203725
ACA1_038260	171.689	-0.816054	0.188744	-4.3236	1.53501e-05	5.76197e-05
ACA1_038270	276.588	-0.690807	0.26177	-2.63898	0.0083155	0.0169238
ACA1_038280	2461.52	0.0103147	0.142089	0.0725932	0.94213	0.958719
ACA1_038290	0	NA	NA	NA	NA	NA
ACA1_038300	238.715	-0.0181132	0.145328	-0.124636	0.900812	0.927517
ACA1_038310	73.0073	0.311787	0.201149	1.55003	0.121135	0.17817
ACA1_038320	108.631	-1.31992	0.224439	-5.88098	4.07856e-09	2.88717e-08
ACA1_038330	375.435	-1.22526	0.231523	-5.29219	1.20863e-07	6.6422e-07
ACA1_038340	193.803	0.62499	0.384956	1.62354	0.104475	0.157432
ACA1_038350	235.877	0.608705	0.129367	4.70527	2.53535e-06	1.09346e-05
ACA1_038360	719.874	-0.902261	0.123643	-7.29728	2.93636e-13	3.95382e-12
ACA1_038370	391.329	0.372607	0.119738	3.11185	0.00185919	0.00442602
ACA1_038380	194.186	0.540605	0.178286	3.03223	0.00242756	0.00562343
ACA1_038390	155.266	0.141547	0.141434	1.0008	0.316923	0.400884
ACA1_038400	436.92	0.583418	0.110232	5.29263	1.20573e-07	6.62876e-07
ACA1_038410	30.3009	-0.355778	0.288935	-1.23134	0.218195	0.293117
ACA1_038420	677.308	-0.575514	0.162984	-3.5311	0.000413834	0.00114344
ACA1_038430	2108.27	-1.22233	0.191356	-6.38773	1.68362e-10	1.48777e-09
ACA1_038440	22.7972	0.0158048	0.240825	0.065628	0.947674	0.962801
ACA1_038450	138.71	-0.253142	0.153331	-1.65095	0.0987478	0.149833
ACA1_038460	36261.6	-1.76516	0.180736	-9.76653	1.56721e-22	6.94574e-21
ACA1_038470	193.654	-0.807904	0.131025	-6.16602	7.00288e-10	5.5992e-09
ACA1_038480	259.312	0.723672	0.127995	5.65391	1.56836e-08	1.00087e-07
ACA1_038490	1519.99	-1.00799	0.216202	-4.66228	3.12722e-06	1.32956e-05
ACA1_038500	377.34	2.06447	0.383035	5.38977	7.05498e-08	4.0241e-07
ACA1_038510	171.94	0.588654	0.190581	3.08873	0.00201014	0.00474163
ACA1_038520	254.22	0.886835	0.132568	6.68963	2.23732e-11	2.24011e-10
ACA1_038530	143.734	-0.670063	0.316065	-2.12002	0.0340045	0.0591425
ACA1_038540	667.229	0.453982	0.134516	3.37493	0.000738344	0.00192486
ACA1_038550	995.475	0.708921	0.202348	3.50348	0.000459224	0.00125637
ACA1_038560	135.557	0.600827	0.186966	3.21356	0.00131101	0.00322736
ACA1_038570	123.208	-0.840189	0.273524	-3.07172	0.00212829	0.00499424
ACA1_038580	3.18301	0.152816	0.546844	0.27945	0.779899	0.82981
ACA1_038980	67.7706	0.616093	0.243236	2.53291	0.0113121	0.0222849
ACA1_039190	158.103	0.194453	0.122478	1.58766	0.112364	0.167313
ACA1_039200	737.735	-1.08054	0.378713	-2.85318	0.00432835	0.0094337
ACA1_039210	16.2758	-0.646343	0.312258	-2.0699	0.0384618	0.0658564
ACA1_039320	166.717	0.998102	0.182259	5.47629	4.34336e-08	2.57289e-07
ACA1_039330	506.763	0.65512	0.171665	3.81627	0.000135486	0.00041596
ACA1_039340	287.675	-0.0911444	0.28255	-0.322578	0.747015	0.80322
ACA1_039450	593.95	1.19712	0.332323	3.6023	0.00031542	0.000893566
ACA1_039460	379.722	-1.98911	0.386537	-5.14597	2.66144e-07	1.38368e-06
ACA1_039470	6.40249	-1.46772	0.517701	-2.83507	0.00458157	0.00992124
ACA1_039480	0.366721	-1.09306	0.477866	-2.28737	0.022174	NA
ACA1_039490	294.039	-0.342296	0.108652	-3.15039	0.00163055	0.00394082
ACA1_039500	337.411	-1.0911	0.215162	-5.07107	3.95581e-07	1.9928e-06
ACA1_039510	243.95	-1.38709	0.282157	-4.91604	8.83102e-07	4.14794e-06
ACA1_039520	87.7326	-0.177635	0.222722	-0.797562	0.425125	0.509769
ACA1_039620	335.95	-0.213541	0.148235	-1.44055	0.149711	0.213464
ACA1_039630	491.913	0.384622	0.164993	2.33115	0.0197456	0.0365889
ACA1_039640	482.241	-0.43318	0.188257	-2.301	0.0213918	0.0392617
ACA1_039650	13.2059	1.31316	0.475592	2.76111	0.00576056	0.0121982
ACA1_039660	577.87	-0.474283	0.219145	-2.16424	0.0304456	0.0536176
ACA1_039770	0.0553287	0	0.160006	0	1	NA
ACA1_039970	0.866531	0	0.512884	0	1	1
ACA1_039980	125.032	-0.0199401	0.128798	-0.154816	0.876966	0.909381
ACA1_040190	312.569	0.472244	0.183943	2.56734	0.0102481	0.0204087
ACA1_040200	111.862	0.859363	0.170196	5.04927	4.43509e-07	2.20959e-06
ACA1_040210	163.042	-0.642757	0.150429	-4.27282	1.93015e-05	7.09247e-05
ACA1_040320	164.647	-0.404181	0.148788	-2.71649	0.00659784	0.0137575
ACA1_040420	14.2101	-0.82087	0.311481	-2.63538	0.00840436	0.017083
ACA1_040430	1339.93	-1.07364	0.153752	-6.98296	2.8903e-12	3.2907e-11
ACA1_040440	905.597	0.194103	0.103511	1.87519	0.0607668	0.0983486
ACA1_040450	108.828	1.303	0.352008	3.70164	0.000214212	0.000629821
ACA1_040460	4010.14	0.923389	0.0931994	9.90767	3.85538e-23	1.85675e-21
ACA1_040470	1426.95	0.218454	0.101638	2.14933	0.0316086	0.0554358
ACA1_040480	494.122	0.770541	0.153483	5.02035	5.15765e-07	2.53807e-06
ACA1_040490	289.556	0.576788	0.174512	3.30514	0.000949279	0.00241392
ACA1_040500	305.785	0.259547	0.152001	1.70754	0.0877219	0.1354
ACA1_040510	144.465	2.05656	0.220723	9.31739	1.19236e-20	4.12136e-19
ACA1_040520	1731.8	1.32924	0.145616	9.12835	6.95502e-20	2.22807e-18
ACA1_040530	118.678	1.86651	0.312307	5.97653	2.27942e-09	1.68801e-08
ACA1_040640	116.592	0.289878	0.207198	1.39904	0.161802	0.227938
ACA1_040650	185.126	-0.735347	0.226537	-3.24603	0.00117026	0.00291315
ACA1_040660	207.595	0.414414	0.12675	3.26954	0.00107724	0.00270443
ACA1_040670	231.723	0.482964	0.199579	2.41992	0.0155239	0.0295109
ACA1_040680	13.5232	-0.403933	0.331042	-1.22019	0.222394	0.297845
ACA1_040690	168.782	0.222138	0.177842	1.24907	0.211639	0.285853
ACA1_040700	158.435	0.582495	0.137694	4.23036	2.33314e-05	8.4252e-05
ACA1_040710	824.201	-0.508508	0.129736	-3.91955	8.87146e-05	0.000284328
ACA1_040720	2339.46	0.488912	0.104851	4.6629	3.11779e-06	1.32605e-05
ACA1_040730	615.587	-0.0295334	0.132443	-0.222989	0.823544	0.866368
ACA1_040740	71.368	0.49362	0.244421	2.01954	0.0434307	0.0732788
ACA1_040750	424.49	0.29481	0.186007	1.58494	0.112979	0.168107
ACA1_040760	351.084	0.991333	0.125552	7.8958	2.88467e-15	5.12012e-14
ACA1_040770	949.819	0.725463	0.249809	2.90407	0.00368348	0.00817745
ACA1_040780	0.271828	-0.87134	0.369866	-2.35583	0.0184815	NA
ACA1_040790	186.165	0.861616	0.230175	3.74331	0.000181611	0.000543703
ACA1_040800	507.623	0.325265	0.122179	2.6622	0.00776317	0.0159232
ACA1_040810	2321.87	-0.713535	0.155312	-4.59422	4.34375e-06	1.79567e-05
ACA1_040820	394.96	1.02042	0.13778	7.40613	1.30037e-13	1.84013e-12
ACA1_040830	747.005	0.572591	0.122329	4.68074	2.85841e-06	1.22257e-05
ACA1_040840	1580.9	1.14851	0.151051	7.60348	2.88279e-14	4.45938e-13
ACA1_040850	1004.06	0.434411	0.130295	3.33407	0.000855862	0.00220066
ACA1_040860	262.578	-2.24305	0.38685	-5.79824	6.70127e-09	4.53065e-08
ACA1_040870	207.902	-0.412035	0.446714	-0.922368	0.356337	0.441919
ACA1_040880	365.583	-0.178728	0.111602	-1.60147	0.109272	0.163374
ACA1_040890	43.2435	0.370458	0.293603	1.26177	0.207033	0.28047
ACA1_041000	44.7417	0.761063	0.214775	3.54354	0.000394796	0.00109398
ACA1_041110	9.53036	0.766623	0.384651	1.99303	0.0462577	0.0774967
ACA1_041220	7.31598	-2.20811	0.435416	-5.07127	3.95177e-07	1.99146e-06
ACA1_041430	32.844	-0.265662	0.271101	-0.97994	0.327116	0.411598
ACA1_041640	2.01089	-0.113848	0.547131	-0.208083	0.835165	0.875841
ACA1_041740	16.5012	0.191462	0.324461	0.590093	0.555128	0.632818
ACA1_041750	243.368	1.35098	0.316104	4.27384	1.92134e-05	7.06529e-05
ACA1_041760	62.8699	-0.390864	0.337108	-1.15946	0.246267	0.324906
ACA1_041770	138.937	0.00921032	0.260091	0.0354119	0.971751	0.981403
ACA1_041780	87.5516	0.47386	0.217616	2.17751	0.0294425	0.0520413
ACA1_041790	1798.77	-0.816856	0.219638	-3.7191	0.000199935	0.000593521
ACA1_041900	454.5	1.32679	0.124767	10.6342	2.06621e-26	1.40814e-24
ACA1_041910	13.2737	-3.77272	0.458858	-8.22199	2.00158e-16	4.13716e-15
ACA1_041920	529.431	-1.79289	0.372587	-4.81201	1.49417e-06	6.73774e-06
ACA1_041930	181.292	0.298571	0.173946	1.71646	0.0860772	0.133224
ACA1_041940	453.035	0.296177	0.181347	1.63321	0.102425	0.154681
ACA1_041950	102.115	0.351733	0.179487	1.95965	0.0500367	0.0829765
ACA1_041960	324.544	-0.26681	0.107481	-2.4824	0.0130501	0.0252983
ACA1_041970	18.3814	0.995454	0.332169	2.99683	0.00272802	0.00624141
ACA1_041980	27.1081	-1.2274	0.323625	-3.79267	0.000149033	0.000453026
ACA1_041990	273.966	-0.0758354	0.117245	-0.646812	0.517754	0.598632
ACA1_042000	248.369	0.376283	0.156284	2.40769	0.0160538	0.030427
ACA1_042010	210.451	0.793311	0.183894	4.31397	1.6035e-05	5.98486e-05
ACA1_042020	120.018	0.00326397	0.19793	0.0164905	0.986843	0.991993
ACA1_042030	168.089	-0.131725	0.184465	-0.714091	0.475171	0.558243
ACA1_042040	147.315	0.0490784	0.13636	0.359918	0.718909	0.778144
ACA1_042050	72.3829	-0.278275	0.241114	-1.15412	0.24845	0.32728
ACA1_042060	767.948	-1.09411	0.282869	-3.86789	0.000109779	0.000344652
ACA1_042070	322.742	0.139604	0.171495	0.81404	0.415622	0.500743
ACA1_042080	0.0535341	0	0.159841	0	1	NA
ACA1_042090	16.3613	-0.278186	0.320106	-0.869044	0.384823	0.470264
ACA1_042200	0.0599465	0.134291	0.160824	0.835018	0.403707	NA
ACA1_042210	767.075	0.549782	0.294319	1.86798	0.0617653	0.0997186
ACA1_042220	0.601754	0.583376	0.557069	1.04722	0.294996	0.377278
ACA1_042230	0.428217	-0.138725	0.313832	-0.442037	0.658462	0.725443
ACA1_042240	173.953	0.572756	0.132563	4.32062	1.55592e-05	5.83225e-05
ACA1_042250	2937.36	-1.57072	0.143803	-10.9228	8.97254e-28	7.12281e-26
ACA1_042260	0.0392788	0	0.159302	0	1	NA
ACA1_042270	453.078	1.11721	0.283048	3.94708	7.91118e-05	0.000255935
ACA1_042280	288.981	0.477712	0.119512	3.99718	6.41028e-05	0.000211715
ACA1_042290	241.105	0.0236314	0.135042	0.174993	0.861085	0.897163
ACA1_042300	0.0914625	0.03236	0.162909	0.198638	0.842546	NA
ACA1_042310	568.322	0.437564	0.148934	2.93798	0.00330359	0.0074196
ACA1_042320	236.686	0.231256	0.107805	2.14514	0.031942	0.0559663
ACA1_042330	85.2766	0.15243	0.231447	0.658593	0.510157	0.591549
ACA1_042340	6.51168	-0.577761	0.502837	-1.149	0.250555	0.329632
ACA1_042450	49.6087	0.289675	0.188918	1.53334	0.125193	0.183243
ACA1_042560	0	NA	NA	NA	NA	NA
ACA1_042670	62.762	-0.0469744	0.183018	-0.256666	0.797436	0.844427
ACA1_042680	292.807	0.426199	0.167958	2.53753	0.0111639	0.0220179
ACA1_042690	129.328	0.734058	0.162167	4.52656	5.99516e-06	2.41545e-05
ACA1_042800	36.2305	-1.45845	0.312913	-4.66088	3.14859e-06	1.33718e-05
ACA1_042810	1.35277	0.0121554	0.573254	0.0212042	0.983083	0.989728
ACA1_042820	44.0424	0.373425	0.293633	1.27174	0.203465	0.276726
ACA1_042830	11.9061	-0.0807954	0.362576	-0.222837	0.823662	0.866368
ACA1_042840	81.944	-0.0611841	0.167163	-0.366015	0.714354	0.774151
ACA1_042850	631.207	0.0942424	0.15253	0.61786	0.536668	0.61616
ACA1_042860	265.326	1.75845	0.313599	5.60733	2.05474e-08	1.28404e-07
ACA1_042870	901.873	0.168699	0.0927952	1.81797	0.0690682	0.110022
ACA1_042880	0	NA	NA	NA	NA	NA
ACA1_042990	9.01804	0.345754	0.353027	0.979398	0.327383	0.411773
ACA1_043100	346.004	0.221075	0.0859931	2.57085	0.0101449	0.0202282
ACA1_043110	44.5967	-0.749814	0.277199	-2.70497	0.00683113	0.0141764
ACA1_043120	357.016	0.495055	0.112894	4.38513	1.15915e-05	4.44869e-05
ACA1_043130	40.397	0.489473	0.234456	2.0877	0.0368252	0.0634603
ACA1_043140	238.857	-0.423941	0.180886	-2.34369	0.0190941	0.0355367
ACA1_043150	492.321	0.0629764	0.0998404	0.630771	0.528191	0.607829
ACA1_043160	100.775	0.456261	0.182969	2.49365	0.0126438	0.02457
ACA1_043170	179.26	0.91438	0.227316	4.02251	5.75824e-05	0.00019187
ACA1_043180	414.304	-0.398262	0.186412	-2.13646	0.0326422	0.0570755
ACA1_043190	1093.6	-3.08802	0.358927	-8.60347	7.73408e-18	1.91339e-16
ACA1_043200	556.19	-0.436442	0.166612	-2.61951	0.00880553	0.0177933
ACA1_043210	0.0118441	-0.0751832	0.155891	-0.48228	0.629607	NA
ACA1_043220	277.445	-0.783842	0.177306	-4.42084	9.83169e-06	3.82673e-05
ACA1_043230	51.8696	-0.175757	0.25961	-0.677003	0.498404	0.580672
ACA1_043240	22.5755	0.939489	0.363666	2.58338	0.00978373	0.0195946
ACA1_043250	318.281	1.5282	0.31852	4.79782	1.60401e-06	7.19267e-06
ACA1_043260	699.88	-0.566831	0.227426	-2.49238	0.012689	0.0246478
ACA1_043270	104.014	1.28248	0.169247	7.57757	3.52076e-14	5.38284e-13
ACA1_043280	222.465	1.04018	0.188499	5.51823	3.42428e-08	2.06e-07
ACA1_043290	351.95	-0.308171	0.346495	-0.889396	0.37379	0.459345
ACA1_043300	179.264	-0.216258	0.25889	-0.835327	0.403534	0.488337
ACA1_043310	52.7352	1.23149	0.231933	5.30969	1.0981e-07	6.08334e-07
ACA1_043320	59.8023	0.138137	0.419036	0.329654	0.741662	0.798355
ACA1_043330	3.30058	-0.489906	0.555126	-0.882513	0.377499	0.463076
ACA1_043340	168.666	0.0346742	0.132639	0.261418	0.79377	0.841655
ACA1_043350	241.903	-0.444487	0.122105	-3.6402	0.000272428	0.000782356
ACA1_043360	377.716	-1.06377	0.166616	-6.38455	1.71905e-10	1.51814e-09
ACA1_043570	30.5889	-0.875871	0.257053	-3.40736	0.00065595	0.00173036
ACA1_043580	229.423	-1.19698	0.191579	-6.248	4.15742e-10	3.47091e-09
ACA1_043590	48.4823	-0.902639	0.218093	-4.13878	3.49156e-05	0.000121909
ACA1_043600	1543.38	-0.382801	0.115937	-3.30181	0.000960642	0.00243925
ACA1_043610	129.894	0.398165	0.173455	2.2955	0.0217047	0.0397452
ACA1_043620	95.5612	0.0872367	0.18767	0.464841	0.642045	0.711862
ACA1_043630	198.747	0.68605	0.12889	5.32277	1.02201e-07	5.67925e-07
ACA1_043640	130.185	2.27908	0.303685	7.50475	6.15468e-14	9.0645e-13
ACA1_043650	319.521	1.62588	0.213588	7.61223	2.69408e-14	4.19893e-13
ACA1_043660	203.974	0.343723	0.212764	1.61552	0.106198	0.159596
ACA1_043670	840.253	0.5837	0.196792	2.96608	0.00301625	0.00683052
ACA1_043770	951.934	0.281137	0.198472	1.41651	0.156628	0.221902
ACA1_043880	50.6082	-0.564817	0.232062	-2.4339	0.014937	0.0285387
ACA1_043890	19.9908	0.598116	0.31676	1.88823	0.0589945	0.0958885
ACA1_044000	2.45904	-1.08953	0.539759	-2.01855	0.0435345	0.0734453
ACA1_044110	0.350135	-0.23569	0.400501	-0.588489	0.556204	NA
ACA1_044120	78.3943	0.0389335	0.185251	0.210166	0.833538	0.874465
ACA1_044130	91.9506	0.157781	0.163507	0.964983	0.334553	0.419154
ACA1_044240	1.03442	-0.460223	0.558946	-0.823375	0.410295	0.495522
ACA1_044250	33.2917	-1.05765	0.384261	-2.75242	0.00591571	0.0124938
ACA1_044260	0	NA	NA	NA	NA	NA
ACA1_044360	421.642	0.254238	0.163127	1.55853	0.119107	0.175615
ACA1_044370	0	NA	NA	NA	NA	NA
ACA1_044380	0.0383185	0	0.156099	0	1	NA
ACA1_044390	0	NA	NA	NA	NA	NA
ACA1_044400	0.00859187	0.0791186	0.15498	0.510509	0.609695	NA
ACA1_044410	103.603	2.92351	0.469883	6.22178	4.91533e-10	4.04884e-09
ACA1_044420	42.5356	2.50904	0.373244	6.72224	1.78953e-11	1.80427e-10
ACA1_044430	0	NA	NA	NA	NA	NA
ACA1_044440	0.02155	0	0.157399	0	1	NA
ACA1_044450	0	NA	NA	NA	NA	NA
ACA1_044460	296.484	1.43348	0.141328	10.143	3.56059e-24	1.90531e-22
ACA1_044470	0.0734215	-0.0304409	0.161118	-0.188936	0.850143	NA
ACA1_044480	341.691	-0.253527	0.128567	-1.97195	0.0486156	0.0809961
ACA1_044690	128.429	0.103787	0.125642	0.826055	0.408773	0.49385
ACA1_044700	198.67	-1.81398	0.39506	-4.59164	4.39777e-06	1.81748e-05
ACA1_044710	3145.62	-0.638151	0.081823	-7.79916	6.23229e-15	1.04824e-13
ACA1_044720	69.6046	1.18125	0.176782	6.68196	2.3576e-11	2.33946e-10
ACA1_044730	63.2216	-1.15773	0.345004	-3.3557	0.000791656	0.00205237
ACA1_044740	3.9251	-0.824128	0.510298	-1.61499	0.106312	0.159675
ACA1_044750	414.289	0.491596	0.125657	3.91221	9.1454e-05	0.000292006
ACA1_044760	204.533	-0.321077	0.129341	-2.4824	0.01305	0.0252983
ACA1_044770	2813.17	-0.457547	0.12225	-3.7427	0.000182053	0.000544914
ACA1_044780	1.02608	1.35685	0.573087	2.36762	0.0179031	0.033597
ACA1_044890	284.17	-0.369718	0.186702	-1.98025	0.0476749	0.0796033
ACA1_044900	113.128	0.015954	0.215578	0.0740059	0.941006	0.95798
ACA1_044910	483.322	0.880712	0.198862	4.42876	9.47784e-06	3.70397e-05
ACA1_044920	556.903	-0.571735	0.126411	-4.52282	6.10224e-06	2.45312e-05
ACA1_044930	292.915	0.382476	0.252526	1.5146	0.129873	0.189021
ACA1_044940	184.495	0.707958	0.226535	3.12516	0.0017771	0.00426008
ACA1_045050	22.2592	-0.907102	0.397833	-2.28011	0.0226012	0.0411729
ACA1_045060	806.585	0.947747	0.138947	6.82092	9.04578e-12	9.47054e-11
ACA1_045070	188.209	1.07545	0.229654	4.68291	2.82835e-06	1.2115e-05
ACA1_045080	318.874	1.16213	0.19948	5.82583	5.68297e-09	3.89689e-08
ACA1_045090	217.786	0.477215	0.234123	2.03831	0.0415191	0.070498
ACA1_045200	468.376	-0.0285495	0.129829	-0.219901	0.825948	0.868296
ACA1_045210	81.2301	-0.473423	0.166226	-2.84806	0.00439863	0.00955947
ACA1_045220	99.131	0.478242	0.203682	2.34799	0.0188752	0.0351928
ACA1_045230	294.461	0.242348	0.126385	1.91753	0.0551701	0.0903329
ACA1_045240	1130.15	-2.18259	0.257574	-8.47364	2.37839e-17	5.56035e-16
ACA1_045250	144.524	-1.18629	0.159104	-7.45605	8.9152e-14	1.28678e-12
ACA1_045260	74.4192	0.0544107	0.403434	0.134869	0.892716	0.921875
ACA1_045270	239.823	0.425831	0.146618	2.90436	0.0036801	0.00817122
ACA1_045280	322.35	-0.434021	0.168499	-2.57581	0.0100007	0.0199787
ACA1_045290	3.12376	-0.884316	0.533215	-1.65846	0.0972245	0.147754
ACA1_045300	52.9879	0.345942	0.285291	1.21259	0.225286	0.300992
ACA1_045310	3160.77	0.0064234	0.109106	0.0588729	0.953053	0.966499
ACA1_045320	1.0158	0.192362	0.567595	0.338907	0.73468	0.792375
ACA1_045330	1.02308	-0.175429	0.56507	-0.310455	0.756215	0.81082
ACA1_045340	809.335	-0.035764	0.157333	-0.227315	0.820179	0.86351
ACA1_045350	116.899	0.531881	0.17732	2.99956	0.00270369	0.00619063
ACA1_045360	50.2106	-3.73155	0.311174	-11.9918	3.9212e-33	5.29472e-31
ACA1_045370	601.718	0.344358	0.181571	1.89655	0.0578875	0.0942589
ACA1_045380	1498.98	-0.679553	0.217316	-3.12702	0.00176585	0.00423734
ACA1_045390	85.2321	0.248823	0.40965	0.607403	0.543584	0.62242
ACA1_045400	106.277	1.07904	0.245592	4.39362	1.11477e-05	4.29612e-05
ACA1_045410	423.643	-0.76103	0.151198	-5.03333	4.82042e-07	2.38921e-06
ACA1_045420	339.128	-0.658613	0.273969	-2.40397	0.0162183	0.0306945
ACA1_045430	0.232465	-0.230569	0.315314	-0.731236	0.464635	NA
ACA1_045440	979.811	2.88583	0.190206	15.1722	5.40634e-52	4.59475e-49
ACA1_045450	115.612	2.97435	0.205327	14.4859	1.48711e-47	7.40887e-45
ACA1_045460	301.497	0.570717	0.182522	3.12685	0.00176692	0.0042385
ACA1_045470	492.988	-0.704862	0.113858	-6.19073	5.98873e-10	4.85551e-09
ACA1_045480	13.0581	-0.516309	0.32722	-1.57786	0.114597	0.170059
ACA1_045590	76.7096	-0.792178	0.196665	-4.02805	5.62405e-05	0.000187615
ACA1_045600	160.108	-0.807378	0.181506	-4.44822	8.65828e-06	3.40672e-05
ACA1_045610	10.8372	-0.552878	0.379259	-1.45778	0.1449	0.207629
ACA1_045620	0.250566	-0.233036	0.258099	-0.902896	0.366581	NA
ACA1_045630	81.7308	-0.985518	0.295319	-3.33713	0.000846498	0.00217891
ACA1_045640	192.056	-0.365902	0.134808	-2.71424	0.00664285	0.0138354
ACA1_045650	519.93	1.28224	0.508847	2.5199	0.0117388	0.0229939
ACA1_045660	2.21124	0.0147647	0.573739	0.0257342	0.979469	0.987259
ACA1_045670	75.9357	0.604837	0.264776	2.28434	0.0223516	0.0407695
ACA1_045680	139.211	0.875451	0.161425	5.42325	5.85248e-08	3.38769e-07
ACA1_045690	175.114	0.670482	0.306654	2.18645	0.0287828	0.0510376
ACA1_045700	344.538	-0.11594	0.130339	-0.889525	0.373721	0.459338
ACA1_045710	147.746	-0.324388	0.130994	-2.47636	0.0132731	0.025672
ACA1_045720	521.434	-0.293786	0.142887	-2.05607	0.0397762	0.0678336
ACA1_045920	4.28122	-0.15241	0.492078	-0.309726	0.756769	0.811173
ACA1_045930	67.4035	-1.01945	0.280122	-3.63931	0.000273365	0.000784735
ACA1_045940	0.0341709	0	0.156077	0	1	NA
ACA1_045950	164.189	0.493056	0.176102	2.79984	0.00511287	0.0109422
ACA1_045960	81.0664	0.207388	0.165945	1.24974	0.211395	0.285577
ACA1_045970	143.288	-0.0896017	0.225307	-0.397688	0.69086	0.753837
ACA1_045980	2.95578	0.726842	0.550636	1.32	0.186834	0.257279
ACA1_045990	68.1866	-2.1983	0.567138	-3.87613	0.000106132	0.000334293
ACA1_046000	177.15	-0.119234	0.280045	-0.425765	0.670279	0.735713
ACA1_046010	294.895	-1.38739	0.240346	-5.77249	7.81098e-09	5.1982e-08
ACA1_046020	51.464	0.45776	0.243513	1.87982	0.0601326	0.097508
ACA1_046030	45.5432	0.625672	0.222653	2.81008	0.00495298	0.0106378
ACA1_046040	48.1785	0.316128	0.205029	1.54187	0.123105	0.180553
ACA1_046050	515.141	-1.50776	0.372128	-4.05172	5.08416e-05	0.000171266
ACA1_046060	155.133	1.1918	0.174046	6.84764	7.50791e-12	7.99958e-11
ACA1_046070	92.9321	-0.400806	0.13658	-2.93459	0.00333988	0.00748713
ACA1_046080	100.695	0.862408	0.167359	5.15305	2.56277e-07	1.33671e-06
ACA1_046090	1036.56	-1.34769	0.111026	-12.1385	6.6022e-34	9.26102e-32
ACA1_046100	4.07102	-0.227474	0.485354	-0.468677	0.6393	0.709063
ACA1_046110	0.437177	0.0018186	0.473703	0.00383912	0.996937	0.998457
ACA1_046120	55.4486	0.481056	0.206094	2.33416	0.0195875	0.036352
ACA1_046130	412.845	0.235858	0.198531	1.18801	0.234829	0.311896
ACA1_046140	2.17356	0.487167	0.558153	0.87282	0.382761	0.468266
ACA1_046150	1410.3	0.0816259	0.153623	0.53134	0.595184	0.669512
ACA1_046160	144.57	-1.73625	0.248687	-6.98166	2.91708e-12	3.31337e-11
ACA1_046170	73.6834	-1.03062	0.315525	-3.26637	0.00108936	0.00272964
ACA1_046180	600.343	0.257109	0.183023	1.40479	0.160083	0.225867
ACA1_046390	516.184	0.4214	0.330557	1.27482	0.202374	0.275424
ACA1_046400	37.4867	-0.33321	0.51775	-0.643573	0.519852	0.600578
ACA1_046410	374.563	0.968812	0.160844	6.02331	1.70883e-09	1.2906e-08
ACA1_046420	793.064	0.456024	0.104521	4.363	1.28291e-05	4.87776e-05
ACA1_046430	398.216	0.444797	0.166016	2.67925	0.00737876	0.0152102
ACA1_046440	78.052	-1.42465	0.361147	-3.94479	7.98692e-05	0.000258212
ACA1_046450	43.0906	0.415806	0.191903	2.16675	0.0302539	0.0533579
ACA1_046460	216.748	-0.859202	0.334864	-2.56583	0.010293	0.0204812
ACA1_046470	1890.45	-1.62365	0.233641	-6.94935	3.66982e-12	4.10066e-11
ACA1_046480	151.643	0.369054	0.167466	2.20375	0.0275419	0.0490811
ACA1_046490	1198.24	-1.31402	0.259821	-5.05742	4.24958e-07	2.12303e-06
ACA1_046500	88.5662	-1.81152	0.271322	-6.67665	2.4447e-11	2.41924e-10
ACA1_046510	143.3	0.233012	0.141191	1.65033	0.0988747	0.149899
ACA1_046520	70.4454	1.03387	0.205216	5.03795	4.70547e-07	2.33624e-06
ACA1_046530	119.127	-2.131	0.222979	-9.55693	1.21302e-21	4.84135e-20
ACA1_046540	93.7903	-0.813039	0.161542	-5.033	4.82872e-07	2.3925e-06
ACA1_046550	503.149	-0.300002	0.210192	-1.42728	0.153499	0.218068
ACA1_046560	177.883	-1.19473	0.19532	-6.11679	9.54797e-10	7.48503e-09
ACA1_046570	245.017	0.627336	0.122382	5.12603	2.95914e-07	1.52582e-06
ACA1_046580	305.751	0.626758	0.16652	3.76386	0.000167312	0.000503819
ACA1_046590	467.676	-0.440627	0.262276	-1.68001	0.0929548	0.142268
ACA1_046600	89.8151	0.0920738	0.191411	0.481026	0.630498	0.701157
ACA1_046610	3.05599	0.228479	0.549767	0.415593	0.677708	0.742007
ACA1_046620	6.52163	-2.5814	0.530349	-4.86737	1.13095e-06	5.20878e-06
ACA1_046630	41.4771	-0.392778	0.222897	-1.76215	0.0780436	0.122439
ACA1_046640	130.989	-0.417595	0.172507	-2.42074	0.0154888	0.0294644
ACA1_046650	7.79201	-0.0867633	0.491812	-0.176415	0.859968	0.896257
ACA1_046660	582.467	-1.05969	0.110642	-9.57764	9.92861e-22	3.98468e-20
ACA1_046670	7.92125	0.980651	0.573232	1.71074	0.0871291	0.134658
ACA1_046680	466.946	-0.299864	0.110762	-2.70728	0.0067836	0.014094
ACA1_046690	52.6223	1.1007	0.216022	5.09534	3.48125e-07	1.77415e-06
ACA1_046700	612.049	1.55361	0.227381	6.83264	8.33647e-12	8.78521e-11
ACA1_046710	6.99545	0.200835	0.564497	0.355778	0.722007	0.780922
ACA1_046720	20.7746	-2.40143	0.536964	-4.47223	7.74075e-06	3.06911e-05
ACA1_046730	267.718	0.798666	0.178302	4.47928	7.48941e-06	2.97763e-05
ACA1_046740	249.945	0.946542	0.193791	4.88435	1.03771e-06	4.81313e-06
ACA1_046850	33.2654	-1.15934	0.258704	-4.48133	7.41803e-06	2.95148e-05
ACA1_046860	0.303782	0.245829	0.333516	0.737081	0.461073	NA
ACA1_046870	320.291	0.643392	0.302347	2.12799	0.0333378	0.0581228
ACA1_046970	400.202	1.53404	0.211408	7.25632	3.97763e-13	5.23873e-12
ACA1_047280	346.994	1.07919	0.154064	7.00481	2.47319e-12	2.8495e-11
ACA1_047290	538.467	1.57635	0.194685	8.09692	5.63685e-16	1.09317e-14
ACA1_047400	49.5909	1.67851	0.23355	7.18694	6.62598e-13	8.36089e-12
ACA1_047410	28.2031	1.47549	0.316832	4.65701	3.20841e-06	1.36018e-05
ACA1_047520	0.415443	-0.576101	0.478648	-1.2036	0.228744	0.305077
ACA1_047630	304.176	1.22738	0.145154	8.45566	2.77506e-17	6.45637e-16
ACA1_047640	186.832	1.07359	0.167191	6.42131	1.35107e-10	1.20347e-09
ACA1_047650	70.5038	-0.434216	0.204238	-2.12603	0.0335006	0.0583646
ACA1_047660	0	NA	NA	NA	NA	NA
ACA1_047670	0	NA	NA	NA	NA	NA
ACA1_047680	0.26394	-0.0696126	0.245299	-0.283787	0.776574	NA
ACA1_047790	0.0274538	0	0.156077	0	1	NA
ACA1_047800	0.20695	0	0.165418	0	1	NA
ACA1_047810	0.071807	0	0.159818	0	1	NA
ACA1_047820	6.46579	-0.596713	0.443721	-1.34479	0.178692	0.247839
ACA1_047930	276.031	1.52652	0.206858	7.37953	1.58851e-13	2.21961e-12
ACA1_048030	80.2187	-0.0334743	0.242801	-0.137867	0.890346	0.920027
ACA1_048040	163.099	0.664889	0.197709	3.36297	0.000771076	0.00200377
ACA1_048050	2509.43	-0.980596	0.134165	-7.3089	2.69343e-13	3.63349e-12
ACA1_048060	567.313	1.24234	0.150945	8.23042	1.86556e-16	3.87821e-15
ACA1_048070	38.3187	-0.851018	0.401484	-2.11968	0.0340331	0.0591852
ACA1_048080	883.329	-0.0291191	0.274989	-0.105892	0.915668	0.937869
ACA1_048090	189.704	0.53624	0.114245	4.69375	2.68241e-06	1.15275e-05
ACA1_048100	1.30769	-0.195318	0.50469	-0.387006	0.698752	0.760953
ACA1_048110	5186.98	-1.26228	0.101992	-12.3762	3.51466e-35	5.58019e-33
ACA1_048120	463.449	0.213905	0.154395	1.38544	0.165919	0.232827
ACA1_048130	323.414	0.339308	0.163187	2.07926	0.0375934	0.0645837
ACA1_048140	275.099	0.881915	0.194368	4.53734	5.69679e-06	2.30682e-05
ACA1_048150	598.779	0.0908715	0.136484	0.665803	0.505537	0.587516
ACA1_048160	191.022	1.35586	0.165514	8.19179	2.57377e-16	5.24484e-15
ACA1_048170	1300.98	-0.804921	0.273405	-2.94406	0.00323942	0.00728679
ACA1_048180	32.1838	0.219957	0.286116	0.768767	0.442032	0.526222
ACA1_048190	282.507	-0.726746	0.171086	-4.24783	2.15849e-05	7.8534e-05
ACA1_048200	1471.51	0.300581	0.174509	1.72244	0.0849898	0.131823
ACA1_048210	19572.9	-1.02599	0.122577	-8.37019	5.75248e-17	1.27864e-15
ACA1_048220	785.452	-0.128297	0.137189	-0.935182	0.349695	0.435063
ACA1_048230	395.121	0.834242	0.110308	7.56283	3.94405e-14	5.99827e-13
ACA1_048240	83.572	-0.220721	0.195781	-1.12739	0.259579	0.339679
ACA1_048250	1729.6	-0.441359	0.0972043	-4.54053	5.61123e-06	2.27536e-05
ACA1_048260	9.9968	-1.1983	0.434887	-2.75543	0.00586154	0.0123939
ACA1_048370	133.487	-0.933957	0.188565	-4.95297	7.30901e-07	3.50134e-06
ACA1_048380	139.197	0.238027	0.14837	1.60428	0.108653	0.162625
ACA1_048390	99.2956	-1.0325	0.193539	-5.33486	9.56184e-08	5.33602e-07
ACA1_048400	2143.03	-0.706527	0.311915	-2.26512	0.023505	0.0425778
ACA1_048410	497.288	0.158844	0.26404	0.60159	0.547447	0.625654
ACA1_048420	131.236	0.520423	0.228136	2.2812	0.0225367	0.0410657
ACA1_048430	76.2449	0.601771	0.168358	3.57436	0.000351084	0.000984179
ACA1_048440	192.892	-1.62314	0.571065	-2.84231	0.00447882	0.00972205
ACA1_048450	259.547	-1.8586	0.560167	-3.31794	0.000906846	0.00231937
ACA1_048460	300.302	-0.236864	0.168065	-1.40937	0.158727	0.224304
ACA1_048470	1693.59	-0.481653	0.154388	-3.11976	0.00180998	0.00432551
ACA1_048480	176.645	-0.209172	0.21112	-0.990776	0.321795	0.40591
ACA1_048490	3753.26	0.372244	0.133214	2.79434	0.00520058	0.0111184
ACA1_048500	907.304	1.47295	0.126972	11.6006	4.09184e-31	4.51289e-29
ACA1_048510	172.203	0.915234	0.153571	5.95967	2.52746e-09	1.85458e-08
ACA1_048520	39.784	-0.533544	0.227035	-2.35005	0.0187709	0.0350255
ACA1_048530	2563.48	0.021987	0.109686	0.200453	0.841126	0.880814
ACA1_048540	47.2565	-0.111959	0.258264	-0.433506	0.664648	0.730976
ACA1_048550	1269.41	0.663094	0.113679	5.83302	5.44337e-09	3.74148e-08
ACA1_048560	588.307	1.31251	0.118178	11.1063	1.16966e-28	1.03044e-26
ACA1_048570	177.359	0.0657472	0.134852	0.487551	0.625868	0.69692
ACA1_048580	114.911	-0.412467	0.212503	-1.941	0.0522587	0.0861517
ACA1_048590	124.14	-0.638354	0.17487	-3.65046	0.000261774	0.00075356
ACA1_048600	41.6978	-0.358224	0.261502	-1.36987	0.170727	0.238648
ACA1_048610	0	NA	NA	NA	NA	NA
ACA1_048620	199.412	0.141993	0.161377	0.87988	0.378924	0.464549
ACA1_048630	4927.03	0.863412	0.190324	4.53654	5.71837e-06	2.31296e-05
ACA1_048640	665.64	0.378126	0.0981689	3.85179	0.000117259	0.000365436
ACA1_048650	1489.92	-0.0487556	0.121371	-0.401708	0.687899	0.751059
ACA1_048850	645.82	0.776006	0.25912	2.99477	0.0027465	0.00627872
ACA1_048860	818.566	-0.17676	0.159101	-1.11099	0.266572	0.347132
ACA1_048870	160.61	-1.10451	0.193965	-5.69438	1.23819e-08	8.02212e-08
ACA1_048880	743.516	-0.654496	0.256196	-2.55467	0.010629	0.0210945
ACA1_048890	91.1972	0.847921	0.196511	4.31488	1.59687e-05	5.96471e-05
ACA1_049090	100.299	0.492533	0.162616	3.02881	0.00245521	0.00567839
ACA1_049200	54.5198	-0.743419	0.223498	-3.3263	0.000880085	0.00225692
ACA1_049210	302.036	-0.214947	0.0939931	-2.28684	0.0222049	0.0405354
ACA1_049320	323.427	-0.385259	0.119598	-3.22129	0.00127615	0.00315014
ACA1_049330	11.4011	-0.819021	0.389582	-2.10231	0.0355263	0.0615468
ACA1_049530	22.9662	0.231845	0.457512	0.506751	0.612329	0.685119
ACA1_049640	202.841	0.557209	0.135967	4.09813	4.16508e-05	0.000143172
ACA1_049750	0.218648	0	0.262178	0	1	NA
ACA1_049760	7.59085	-0.997096	0.520749	-1.91473	0.0555265	0.0908444
ACA1_049970	469.907	0.39151	0.386782	1.01222	0.311431	0.395149
ACA1_049980	328.251	0.703842	0.131467	5.35376	8.61439e-08	4.83343e-07
ACA1_049990	2182.25	0.790526	0.111973	7.05998	1.6653e-12	1.98027e-11
ACA1_050000	131.908	-0.34826	0.191247	-1.821	0.0686069	0.109444
ACA1_050010	177.435	0.270488	0.185011	1.46201	0.143737	0.206187
ACA1_050120	464.098	0.992931	0.231966	4.28049	1.8648e-05	6.87487e-05
ACA1_050130	200.769	0.128455	0.140082	0.917	0.359143	0.444597
ACA1_050140	266.276	-0.299696	0.140678	-2.13037	0.0331411	0.0578567
ACA1_050150	150.004	-1.10958	0.16227	-6.83786	8.03845e-12	8.50216e-11
ACA1_050160	504.865	0.505395	0.135323	3.73473	0.000187916	0.000560143
ACA1_050170	75.135	-0.304241	0.336689	-0.903626	0.366194	0.451739
ACA1_050180	1984.62	-0.659798	0.166378	-3.96566	7.31935e-05	0.000238498
ACA1_050190	210.682	0.272965	0.206182	1.3239	0.185536	0.255907
ACA1_050200	49.4716	0.5384	0.330773	1.6277	0.103588	0.156259
ACA1_050210	153.978	0.107136	0.169378	0.632523	0.527045	0.606898
ACA1_050220	280.568	2.48948	0.345596	7.20345	5.87074e-13	7.4996e-12
ACA1_050330	1080.57	0.0421583	0.197231	0.213751	0.830741	0.872025
ACA1_050340	1911.19	-0.223663	0.124359	-1.79853	0.0720936	0.114387
ACA1_050350	1722.21	-1.387	0.134615	-10.3034	6.7991e-25	3.91368e-23
ACA1_050360	1070.43	-0.349635	0.100087	-3.49332	0.000477051	0.00130095
ACA1_050370	532.112	-0.526919	0.186905	-2.81919	0.00481456	0.0103636
ACA1_050380	427.534	-1.52386	0.272962	-5.58267	2.36859e-08	1.46183e-07
ACA1_050390	163.774	-2.33614	0.531786	-4.393	1.11795e-05	4.30725e-05
ACA1_050400	2882.32	-2.43917	0.498928	-4.88883	1.01436e-06	4.71237e-06
ACA1_050410	3.23578	-0.588095	0.516474	-1.13867	0.254839	0.334355
ACA1_050420	9.53809	0.453873	0.455914	0.995524	0.319481	0.403626
ACA1_050430	160.78	0.315686	0.183336	1.7219	0.0850873	0.131938
ACA1_050440	75.9793	0.225979	0.22494	1.00462	0.315082	0.398939
ACA1_050450	91.181	0.0340478	0.186525	0.182538	0.855161	0.892084
ACA1_050460	252.405	1.75513	0.143815	12.2041	2.95632e-34	4.27129e-32
ACA1_050470	92.6423	-1.1469	0.447441	-2.56324	0.0103701	0.0206232
ACA1_050480	26.5714	-1.0015	0.345811	-2.8961	0.00377834	0.00835979
ACA1_050490	315.112	-1.24706	0.255875	-4.87371	1.09523e-06	5.05394e-06
ACA1_050500	4.39231	2.74561	0.468302	5.86291	4.54831e-09	3.18073e-08
ACA1_050510	362.188	-0.0508919	0.1939	-0.262464	0.792964	0.840902
ACA1_050520	232.578	-0.388734	0.117281	-3.31455	0.000917908	0.00234476
ACA1_050620	54.9046	0.657267	0.232105	2.83177	0.00462911	0.0100167
ACA1_050630	23.8815	-1.17452	0.417438	-2.81363	0.00489856	0.0105288
ACA1_050740	82.4254	-0.364909	0.20131	-1.81267	0.069882	0.111195
ACA1_050750	0.435958	0	0.365658	0	1	1
ACA1_050760	188.487	-0.283455	0.13314	-2.129	0.033254	0.0580048
ACA1_050860	27.1492	0.670447	0.259299	2.58562	0.00972046	0.0194787
ACA1_050870	485.826	0.797821	0.136279	5.85433	4.78948e-09	3.33486e-08
ACA1_050880	107.34	0.632794	0.186869	3.38629	0.000708445	0.00185461
ACA1_050990	123.944	0.575951	0.139974	4.11471	3.87665e-05	0.000133995
ACA1_051000	7.91805	-1.84489	0.450312	-4.09691	4.18703e-05	0.000143863
ACA1_051110	133.632	-1.75322	0.320013	-5.47858	4.28742e-08	2.54481e-07
ACA1_051220	12.9901	-0.258485	0.368865	-0.700759	0.483453	0.566178
ACA1_051330	30.1426	-0.288144	0.328662	-0.876719	0.380639	0.466334
ACA1_051440	344.604	-0.495428	0.15164	-3.26713	0.00108643	0.00272277
ACA1_051450	206.51	0.227703	0.145052	1.56981	0.116459	0.172257
ACA1_051460	10.173	1.10058	0.510824	2.15452	0.0311994	0.0547914
ACA1_051470	25.3457	1.19114	0.47342	2.51603	0.0118684	0.0232192
ACA1_051480	12618.7	-0.797214	0.113743	-7.0089	2.40194e-12	2.77182e-11
ACA1_051490	342.803	-0.519101	0.416785	-1.24549	0.212952	0.287295
ACA1_051500	108.773	0.518669	0.276923	1.87297	0.061072	0.0987729
ACA1_051510	129.245	0.596995	0.239047	2.49739	0.012511	0.024325
ACA1_051520	0.36505	-0.171744	0.320511	-0.535844	0.592067	NA
ACA1_051530	326.85	0.143385	0.24564	0.583717	0.559411	0.636758
ACA1_051540	91.8522	-1.02723	0.341652	-3.00665	0.00264146	0.00606063
ACA1_051550	1856.09	-0.596148	0.198132	-3.00885	0.00262239	0.00601974
ACA1_051660	252.296	0.269563	0.134103	2.01012	0.0444182	0.0746921
ACA1_051670	116.412	-0.129935	0.18389	-0.706588	0.479822	0.562746
ACA1_051680	41.8229	-1.4176	0.271481	-5.22174	1.77253e-07	9.51675e-07
ACA1_051690	402.093	-0.310357	0.111396	-2.78607	0.00533519	0.0113842
ACA1_051700	324.076	-0.181064	0.0959499	-1.88707	0.0591509	0.0961318
ACA1_051710	286.389	0.692187	0.130543	5.30238	1.14304e-07	6.31051e-07
ACA1_051820	1118.49	0.239682	0.108466	2.20974	0.0271234	0.0484159
ACA1_051830	439.9	-1.7907	0.539644	-3.31831	0.000905647	0.00231702
ACA1_051840	481.587	-0.318971	0.18379	-1.73551	0.0826497	0.128645
ACA1_051850	4943.03	0.459	0.156671	2.92971	0.00339283	0.00759053
ACA1_051860	529.647	0.390169	0.120124	3.24806	0.00116196	0.00289349
ACA1_051870	1329.11	-0.478876	0.0858894	-5.5755	2.4682e-08	1.51812e-07
ACA1_051880	1131.54	0.775338	0.207278	3.74058	0.000183599	0.000549088
ACA1_051890	19.4669	-1.21024	0.388636	-3.11408	0.0018452	0.00439852
ACA1_051900	25.6071	-1.17982	0.276157	-4.27229	1.93473e-05	7.10729e-05
ACA1_051910	139.353	-0.394328	0.195814	-2.01378	0.0440322	0.0741379
ACA1_051920	180.734	1.26325	0.18347	6.88532	5.7657e-12	6.26624e-11
ACA1_051930	87.7063	1.10889	0.244048	4.54374	5.5266e-06	2.24293e-05
ACA1_051940	276.488	-0.798258	0.142844	-5.5883	2.29302e-08	1.41822e-07
ACA1_051950	25.5636	0.042828	0.341701	0.125338	0.900256	0.927024
ACA1_052060	54.2249	0.0771966	0.217612	0.354743	0.722782	0.781702
ACA1_052070	4.46971	0.338385	0.446079	0.758577	0.448106	0.531852
ACA1_052170	9.4353	0.956485	0.381141	2.50953	0.0120893	0.0236195
ACA1_052180	143.205	0.0412939	0.148391	0.278278	0.780799	0.830583
ACA1_052190	926.363	0.406182	0.15277	2.65877	0.00784257	0.01607
ACA1_052200	167.919	0.775375	0.215541	3.59734	0.000321494	0.000908814
ACA1_052210	379.559	-1.05675	0.121908	-8.66843	4.38112e-18	1.12431e-16
ACA1_052220	374.758	-1.02679	0.174527	-5.88328	4.02224e-09	2.84869e-08
ACA1_052230	35.3732	0.563017	0.385446	1.46069	0.144101	0.206627
ACA1_052240	193.096	0.235826	0.208363	1.13181	0.257715	0.337546
ACA1_052250	574.928	0.162698	0.132346	1.22934	0.218945	0.293961
ACA1_052260	268.059	1.11889	0.225417	4.96362	6.91917e-07	3.32452e-06
ACA1_052270	102.165	2.04018	0.191118	10.6749	1.3336e-26	9.35332e-25
ACA1_052280	50.8335	1.67291	0.28922	5.78422	7.28485e-09	4.88406e-08
ACA1_052290	40.2945	1.29461	0.229475	5.64162	1.68455e-08	1.06794e-07
ACA1_052300	45.027	-0.635066	0.263004	-2.41466	0.0157497	0.0298899
ACA1_052310	176.621	-2.0287	0.529591	-3.83069	0.000127783	0.000394827
ACA1_052320	57.0773	-0.725189	0.272656	-2.65972	0.00782059	0.016034
ACA1_052330	385.386	0.224186	0.13427	1.66966	0.0949867	0.144933
ACA1_052340	5.04508	2.04826	0.522552	3.91971	8.8654e-05	0.000284196
ACA1_052350	85.5113	-1.80417	0.454359	-3.97082	7.16265e-05	0.000233761
ACA1_052360	639.32	0.307476	0.220617	1.39371	0.163406	0.229881
ACA1_052370	0.23762	-0.22505	0.33369	-0.674429	0.500038	NA
ACA1_052380	218.461	-0.749256	0.125416	-5.97418	2.31257e-09	1.71081e-08
ACA1_052390	305.841	-0.912133	0.193683	-4.70942	2.48419e-06	1.07395e-05
ACA1_052400	502.662	-0.783828	0.0804079	-9.74815	1.87863e-22	8.20015e-21
ACA1_052410	36.1089	0.222933	0.27868	0.799962	0.423733	0.508564
ACA1_052420	0.0547494	0.103724	0.159794	0.649108	0.516269	NA
ACA1_052430	311.408	-0.908536	0.16076	-5.65149	1.59066e-08	1.01376e-07
ACA1_052440	307.538	-0.177477	0.10751	-1.6508	0.0987798	0.149834
ACA1_052450	59.8339	-2.18079	0.500319	-4.3588	1.30776e-05	4.9657e-05
ACA1_052460	98.0556	0.450879	0.203455	2.21611	0.0266841	0.0476907
ACA1_052470	1.25303	-1.04295	0.570584	-1.82787	0.0675695	0.108016
ACA1_052480	825.405	1.30558	0.364577	3.58109	0.000342169	0.00096012
ACA1_052490	141.735	0.742703	0.222795	3.33357	0.000857391	0.00220341
ACA1_052500	261.288	1.22612	0.191483	6.40329	1.52067e-10	1.34872e-09
ACA1_052510	450.955	1.813	0.169505	10.6958	1.06475e-26	7.56894e-25
ACA1_052520	86.7634	-1.05842	0.244924	-4.32142	1.55031e-05	5.81488e-05
ACA1_052530	333.248	-1.9186	0.252216	-7.60698	2.80573e-14	4.35883e-13
ACA1_052540	73.237	-0.228776	0.213228	-1.07292	0.283307	0.364619
ACA1_052550	0.226105	-0.112792	0.285807	-0.394644	0.693105	NA
ACA1_052560	3.97637	1.67895	0.546797	3.07052	0.00213687	0.00501356
ACA1_052570	152.092	-0.952494	0.3674	-2.59252	0.00952746	0.0191296
ACA1_052580	464.254	0.417929	0.230976	1.8094	0.0703881	0.111952
ACA1_052590	168.583	1.70536	0.196696	8.67001	4.32067e-18	1.11077e-16
ACA1_052600	131.851	0.873218	0.216908	4.02576	5.67927e-05	0.00018937
ACA1_052610	703.907	-1.22254	0.184731	-6.61795	3.64216e-11	3.5293e-10
ACA1_052620	266.436	-1.14699	0.232239	-4.93884	7.85867e-07	3.73986e-06
ACA1_052630	179.55	-0.276454	0.268709	-1.02882	0.303563	0.386766
ACA1_052640	657.402	0.202319	0.176007	1.14949	0.250352	0.329455
ACA1_052650	53.2831	0.643447	0.206099	3.12203	0.00179611	0.00429995
ACA1_052660	344.203	0.878878	0.149598	5.87495	4.22975e-09	2.9825e-08
ACA1_052670	190.058	-0.285881	0.156894	-1.82213	0.068435	0.109194
ACA1_052680	122.987	1.31832	0.26849	4.91013	9.10148e-07	4.25974e-06
ACA1_052690	215.942	0.604732	0.195129	3.09914	0.0019408	0.00459759
ACA1_052700	422.001	-0.475585	0.418236	-1.13712	0.255488	0.335053
ACA1_052710	906.681	0.739784	0.200292	3.69352	0.00022117	0.000648298
ACA1_052720	455.548	-0.329664	0.163907	-2.01129	0.0442946	0.0744929
ACA1_052730	236.109	-0.971872	0.11393	-8.53046	1.45769e-17	3.49846e-16
ACA1_052740	58.6388	-1.96751	0.485317	-4.05408	5.03323e-05	0.000169776
ACA1_052750	197.699	0.379892	0.231797	1.6389	0.101234	0.15322
ACA1_052760	6.60133	-0.891789	0.512091	-1.74147	0.0816019	0.12721
ACA1_052770	58.8758	0.73977	0.373928	1.97838	0.0478862	0.0799191
ACA1_052780	427.625	1.03883	0.135998	7.63855	2.19685e-14	3.46886e-13
ACA1_052790	1553.77	-0.20048	0.152075	-1.3183	0.187404	0.257868
ACA1_052800	79.4936	1.67696	0.45848	3.65766	0.000254529	0.0007349
ACA1_052810	588.001	-0.0995481	0.17037	-0.584307	0.559014	0.636384
ACA1_052820	202.292	0.468981	0.154182	3.04173	0.00235222	0.00546029
ACA1_052830	750.293	0.303439	0.137326	2.20963	0.027131	0.0484235
ACA1_052840	1023.21	-1.24447	0.359362	-3.46299	0.000534202	0.00143995
ACA1_052850	918.321	-0.0425729	0.195671	-0.217574	0.827761	0.869528
ACA1_052860	63.4075	-0.33382	0.184402	-1.81029	0.0702515	0.111759
ACA1_052870	96.3985	-0.156549	0.139685	-1.12073	0.262403	0.342599
ACA1_052880	2.37681	-0.742643	0.56696	-1.30987	0.19024	0.261248
ACA1_052890	20.0203	-0.146669	0.294086	-0.498727	0.617972	0.690143
ACA1_053000	22.0774	-0.541435	0.292509	-1.851	0.0641696	0.103094
ACA1_053110	770.571	-0.764494	0.262151	-2.91624	0.00354277	0.00789541
ACA1_053220	446.374	-2.05561	0.479585	-4.28622	1.81738e-05	6.71206e-05
ACA1_053230	92.5121	-0.306845	0.226893	-1.35238	0.176254	0.24507
ACA1_053240	6882.53	-1.62141	0.116481	-13.9199	4.79241e-44	1.7754e-41
ACA1_053250	239.391	0.792878	0.243195	3.26025	0.00111314	0.00278246
ACA1_053260	1058.85	0.530755	0.208442	2.5463	0.0108873	0.0215331
ACA1_053270	163.495	-1.11263	0.168856	-6.58925	4.42054e-11	4.23528e-10
ACA1_053280	3802.76	0.0792225	0.105786	0.748897	0.453919	0.537472
ACA1_053290	7094.83	0.0729855	0.162847	0.448183	0.654021	0.721926
ACA1_053300	1986.08	-0.912858	0.153559	-5.94469	2.76984e-09	2.01707e-08
ACA1_053310	54.1492	-0.488255	0.237704	-2.05405	0.0399709	0.0681168
ACA1_053320	97.2027	-0.141376	0.176325	-0.801794	0.422672	0.507586
ACA1_053330	0	NA	NA	NA	NA	NA
ACA1_053340	750.73	0.334203	0.136308	2.45182	0.0142134	0.0273079
ACA1_053350	140.01	1.40378	0.17236	8.14448	3.80906e-16	7.58033e-15
ACA1_053360	212.684	-0.168013	0.12572	-1.33641	0.181416	0.250943
ACA1_053370	226.968	0.0595473	0.130722	0.455526	0.648731	0.717513
ACA1_053380	32.4936	-0.439566	0.246146	-1.78579	0.0741332	0.117176
ACA1_053390	166.572	-0.61433	0.14685	-4.18338	2.87206e-05	0.000101854
ACA1_053400	2518.13	0.487974	0.15314	3.18646	0.00144024	0.00351556
ACA1_053410	122.146	-1.06087	0.174159	-6.09142	1.11911e-09	8.68358e-09
ACA1_053420	158.004	-0.347426	0.171434	-2.02659	0.0427043	0.0722456
ACA1_053430	52.12	-0.523666	0.319921	-1.63686	0.101659	0.153686
ACA1_053440	535.233	-0.1395	0.133649	-1.04378	0.296588	0.379078
ACA1_053450	241.949	-0.0920546	0.142854	-0.644394	0.51932	0.600011
ACA1_053460	24.0239	0.220287	0.310136	0.710291	0.477524	0.560369
ACA1_053470	178.529	0.0135133	0.14784	0.0914044	0.927171	0.947084
ACA1_053480	121.691	-3.01247	0.485635	-6.20315	5.53437e-10	4.52266e-09
ACA1_053490	168.504	-0.642215	0.157796	-4.0699	4.70332e-05	0.00015974
ACA1_053600	295.832	-0.197344	0.182067	-1.08391	0.278406	0.359626
ACA1_053610	329.618	0.419603	0.251581	1.66787	0.095342	0.145321
ACA1_053620	77.5969	-1.45006	0.543209	-2.66943	0.00759798	0.0156176
ACA1_053630	314.798	0.234025	0.129907	1.80148	0.0716277	0.11371
ACA1_053640	1069.88	0.744169	0.118685	6.27012	3.60759e-10	3.03744e-09
ACA1_053650	377.57	0.024845	0.150349	0.165249	0.868748	0.903128
ACA1_053660	2600.87	1.00107	0.150405	6.65584	2.81677e-11	2.76285e-10
ACA1_053670	1545.33	0.0976332	0.189675	0.51474	0.606734	0.680228
ACA1_053780	754.447	-0.235423	0.128926	-1.82603	0.0678456	0.108397
ACA1_053790	355.501	0.621473	0.0977468	6.35799	2.0441e-10	1.7888e-09
ACA1_053800	656.72	0.969189	0.129336	7.49358	6.70204e-14	9.81064e-13
ACA1_053810	0	NA	NA	NA	NA	NA
ACA1_053820	267.467	0.117695	0.200777	0.586197	0.557743	0.63511
ACA1_053830	125.136	0.0283868	0.170358	0.166631	0.867661	0.902387
ACA1_053840	225.418	-0.402037	0.23394	-1.71855	0.0856965	0.132706
ACA1_053850	213.17	-0.724432	0.150026	-4.82871	1.37422e-06	6.22015e-06
ACA1_053860	542.884	0.501644	0.142341	3.52423	0.000424709	0.00117125
ACA1_053870	828.47	1.19935	0.113952	10.5251	6.62126e-26	4.23292e-24
ACA1_053880	1132.17	0.29626	0.167745	1.76613	0.0773743	0.121525
ACA1_053890	5143.83	-0.0455344	0.120357	-0.378328	0.705187	0.766344
ACA1_053900	0	NA	NA	NA	NA	NA
ACA1_053910	220.907	-0.976488	0.173789	-5.61882	1.92271e-08	1.20832e-07
ACA1_053920	136.094	0.581016	0.124643	4.66145	3.1399e-06	1.33388e-05
ACA1_053930	242.639	-0.544837	0.190737	-2.85648	0.0042837	0.00935474
ACA1_053940	231.637	0.105741	0.100149	1.05583	0.291046	0.37315
ACA1_053950	152.515	-0.902467	0.135739	-6.64856	2.9598e-11	2.89724e-10
ACA1_053960	706.182	-0.52897	0.173076	-3.05628	0.00224099	0.00523235
ACA1_053970	83.7914	-0.147172	0.274972	-0.535227	0.592493	0.667204
ACA1_053980	36.0383	0.293094	0.330662	0.886385	0.37541	0.460944
ACA1_053990	70.066	0.504419	0.287201	1.75633	0.0790327	0.123685
ACA1_054000	109.876	0.710481	0.143453	4.95269	7.31934e-07	3.50513e-06
ACA1_054010	213.819	-0.718328	0.24357	-2.94917	0.00318631	0.00717963
ACA1_054020	889.139	1.21465	0.154267	7.87367	3.44396e-15	6.05332e-14
ACA1_054030	375.977	-0.93093	0.185299	-5.02394	5.06224e-07	2.49537e-06
ACA1_054040	733.814	-0.820322	0.131836	-6.22228	4.89988e-10	4.04073e-09
ACA1_054050	273.202	0.637642	0.204989	3.11061	0.001867	0.0044417
ACA1_054060	54.8909	-0.791242	0.289458	-2.73353	0.00626585	0.0131506
ACA1_054070	904.089	0.448689	0.0996328	4.50342	6.6867e-06	2.67468e-05
ACA1_054080	22.764	-1.20324	0.320449	-3.75484	0.000173452	0.000520896
ACA1_054090	72.9704	0.986391	0.190515	5.17751	2.24869e-07	1.18443e-06
ACA1_054100	626.799	0.580963	0.184828	3.14326	0.00167078	0.00403198
ACA1_054110	21.0494	-0.366726	0.29402	-1.24728	0.212294	0.286576
ACA1_054120	175.816	1.20323	0.261039	4.60939	4.03847e-06	1.67859e-05
ACA1_054130	225.6	0.358581	0.159751	2.24462	0.0247926	0.044597
ACA1_054140	1440.65	-0.247247	0.562157	-0.439818	0.660069	0.726936
ACA1_054150	276.621	1.34887	0.177142	7.61464	2.64434e-14	4.13032e-13
ACA1_054160	14.0881	1.02198	0.433561	2.35717	0.0184147	0.0344231
ACA1_054170	206.93	-0.169465	0.140691	-1.20452	0.22839	0.30466
ACA1_054180	240.894	0.113436	0.178877	0.634157	0.525978	0.60613
ACA1_054190	910.231	-0.34413	0.107786	-3.19272	0.00140939	0.00344665
ACA1_054200	26600.7	-0.859465	0.145285	-5.91572	3.30418e-09	2.37743e-08
ACA1_054210	226.145	-1.45039	0.158921	-9.12649	7.07531e-20	2.26159e-18
ACA1_054220	742.51	-2.1171	0.218184	-9.7033	2.91909e-22	1.24778e-20
ACA1_054230	1199.86	0.140716	0.0795895	1.76803	0.0770561	0.12113
ACA1_054240	7.28867	-0.463926	0.471101	-0.98477	0.324737	0.409254
ACA1_054250	160.487	-0.859642	0.354085	-2.42779	0.0151913	0.0289443
ACA1_054260	0.141605	0.033222	0.164146	0.202393	0.839609	NA
ACA1_054270	52.9874	-0.313227	0.323644	-0.967814	0.333137	0.417665
ACA1_054280	52.1433	0.471574	0.45746	1.03085	0.30261	0.385752
ACA1_054290	16.0889	-0.627148	0.447535	-1.40134	0.161113	0.227165
ACA1_054300	7.56329	-0.424842	0.551208	-0.770747	0.440857	0.52493
ACA1_054310	19.2413	-0.472754	0.395168	-1.19634	0.231566	0.308299
ACA1_054320	8390.49	0.707457	0.145222	4.87156	1.10719e-06	5.10424e-06
ACA1_054330	586.623	0.67288	0.165026	4.07743	4.55363e-05	0.00015524
ACA1_054340	9460.59	-0.909521	0.237178	-3.83477	0.000125684	0.000388922
ACA1_054350	133.243	1.52616	0.263947	5.78204	7.3798e-09	4.93627e-08
ACA1_054360	735.111	0.370623	0.0825945	4.48727	7.21428e-06	2.87616e-05
ACA1_054370	90.1268	-0.550225	0.177004	-3.10855	0.0018801	0.00446917
ACA1_054380	339.983	0.386561	0.21132	1.82927	0.067359	0.107739
ACA1_054390	38.3863	-1.27976	0.400525	-3.19521	0.0013973	0.00341942
ACA1_054400	0.769433	0.0129829	0.490419	0.0264731	0.97888	0.986734
ACA1_054410	758.626	-0.730797	0.0847058	-8.62747	6.27236e-18	1.57605e-16
ACA1_054420	90.4987	0.185882	0.216257	0.859542	0.390042	0.475194
ACA1_054430	121.635	0.564298	0.543236	1.03877	0.298912	0.381677
ACA1_054440	384.984	0.218821	0.07575	2.88873	0.00386799	0.00854375
ACA1_054450	68.892	0.27198	0.200152	1.35887	0.174188	0.242594
ACA1_054460	4175.56	-0.983987	0.161734	-6.08399	1.17231e-09	9.06236e-09
ACA1_054470	247.813	-0.491561	0.151572	-3.24308	0.00118245	0.00293945
ACA1_054480	737.598	-0.578164	0.240201	-2.407	0.0160843	0.0304688
ACA1_054490	110.128	-0.691457	0.131479	-5.25908	1.44781e-07	7.87572e-07
ACA1_054500	976.436	1.33397	0.164118	8.12813	4.35949e-16	8.5938e-15
ACA1_054510	775.513	0.578986	0.273894	2.1139	0.0345235	0.0599619
ACA1_054520	35.3643	-1.01414	0.519976	-1.95035	0.0511343	0.0845101
ACA1_054530	280.09	0.320298	0.126911	2.5238	0.0116096	0.0227852
ACA1_054540	133.626	0.973679	0.170832	5.69964	1.20059e-08	7.79598e-08
ACA1_054550	99.7945	-1.60983	0.323763	-4.97225	6.61794e-07	3.19231e-06
ACA1_054560	62.9841	-1.99761	0.316413	-6.31329	2.7316e-10	2.35058e-09
ACA1_054570	1472.59	-0.314073	0.085935	-3.65477	0.000257412	0.000741742
ACA1_054580	41.4694	-0.280591	0.265142	-1.05827	0.289933	0.372062
ACA1_054590	173.348	0.920373	0.205994	4.46797	7.89657e-06	3.12403e-05
ACA1_054600	2.51304	0.337978	0.564539	0.598679	0.549387	0.627442
ACA1_054610	217.907	-0.470915	0.123705	-3.80678	0.00014079	0.000430413
ACA1_054620	148.065	-0.274724	0.204455	-1.34369	0.179049	0.24824
ACA1_054630	15.4844	-1.39291	0.326148	-4.2708	1.94774e-05	7.14961e-05
ACA1_054640	256.249	0.339564	0.512883	0.662069	0.507927	0.589629
ACA1_054650	70.5428	5.20278	0.446937	11.641	2.55098e-31	2.87942e-29
ACA1_054660	1.03037	0.0420881	0.541532	0.0777204	0.93805	0.955779
ACA1_054670	0.414276	-0.0181092	0.183481	-0.0986982	0.921378	0.942647
ACA1_054680	0.82047	-0.332468	0.554997	-0.599045	0.549143	0.627245
ACA1_054690	346.39	-1.16966	0.1928	-6.06671	1.30555e-09	1.00343e-08
ACA1_054700	212.377	0.20906	0.173176	1.20721	0.227351	0.303442
ACA1_054710	226.229	0.304262	0.216716	1.40397	0.160329	0.226191
ACA1_054720	53.2587	-1.03008	0.517634	-1.98999	0.0465923	0.078003
ACA1_054730	71.35	-1.01779	0.495347	-2.05471	0.0399073	0.068033
ACA1_054740	214.281	-0.000474793	0.106522	-0.00445724	0.996444	0.99824
ACA1_054750	427.613	0.314603	0.0925498	3.39928	0.000675636	0.0017771
ACA1_054760	379.562	1.24576	0.136864	9.10217	8.85451e-20	2.80548e-18
ACA1_054770	3.51567	-0.228852	0.565853	-0.404436	0.685892	0.749321
ACA1_054780	375.407	0.586501	0.251303	2.33384	0.019604	0.0363685
ACA1_054790	84.785	0.239236	0.192775	1.24102	0.214599	0.289229
ACA1_054800	55.2141	0.0896518	0.37905	0.236517	0.813031	0.857547
ACA1_054810	3.16604	0.462511	0.546906	0.845688	0.397727	0.482685
ACA1_054820	1080.43	-0.803264	0.214322	-3.74793	0.000178297	0.000534558
ACA1_054830	108.106	0.248396	0.188255	1.31946	0.187015	0.25748
ACA1_054840	392.842	-0.340036	0.110336	-3.08182	0.00205738	0.00484041
ACA1_054850	293.979	-1.28253	0.24578	-5.21821	1.80662e-07	9.65327e-07
ACA1_054860	71.708	0.84478	0.275957	3.06128	0.00220395	0.00515503
ACA1_054870	2.57367	-1.04932	0.525479	-1.99689	0.0458377	0.0768643
ACA1_054880	86.5178	0.213499	0.211219	1.01079	0.312116	0.395774
ACA1_054890	184.011	0.472218	0.156038	3.02629	0.00247572	0.00572124
ACA1_054900	274.477	0.375422	0.226736	1.65577	0.0977688	0.148488
ACA1_054910	96.2309	-0.284394	0.209463	-1.35773	0.174551	0.243029
ACA1_054920	379.723	-0.439821	0.0983438	-4.47228	7.73908e-06	3.06911e-05
ACA1_054930	879.62	2.5633	0.126544	20.2562	3.13326e-91	2.26347e-87
ACA1_054940	880.176	-0.223731	0.324472	-0.689522	0.490495	0.572984
ACA1_054950	286.884	0.421672	0.185593	2.27203	0.0230848	0.0419428
ACA1_054960	0.0887971	0	0.159832	0	1	NA
ACA1_054970	194.446	1.25984	0.191673	6.57283	4.93663e-11	4.71722e-10
ACA1_054980	37.2072	0.601528	0.26491	2.27069	0.023166	0.0420692
ACA1_054990	125.915	-0.68189	0.138816	-4.91217	9.00721e-07	4.21972e-06
ACA1_055000	18.2307	-0.555158	0.315383	-1.76027	0.0783621	0.122797
ACA1_055010	415.378	0.700677	0.174655	4.01178	6.02631e-05	0.000199927
ACA1_055020	7.61188	-0.629984	0.514067	-1.22549	0.220391	0.295573
ACA1_055030	526.294	-0.352054	0.110682	-3.18076	0.0014689	0.00357782
ACA1_055040	292.646	0.389338	0.23006	1.69233	0.0905828	0.139124
ACA1_055050	1788.08	-0.107203	0.137167	-0.781547	0.434481	0.518663
ACA1_055060	1617.71	-0.033056	0.101452	-0.325828	0.744555	0.800933
ACA1_055270	960.823	-0.0287932	0.108687	-0.264918	0.791072	0.839472
ACA1_055280	11.4064	-0.559641	0.368052	-1.52055	0.128373	0.187101
ACA1_055290	6.23685	-1.80739	0.459702	-3.93165	8.43656e-05	0.000271292
ACA1_055300	138.951	-0.194677	0.17555	-1.10896	0.267449	0.34796
ACA1_055310	724.182	0.368194	0.163501	2.25193	0.0243267	0.0438847
ACA1_055320	12.5799	-0.598887	0.392113	-1.52733	0.126678	0.185079
ACA1_055330	212.275	0.777083	0.217526	3.57237	0.000353764	0.000990156
ACA1_055340	929.614	0.873993	0.183836	4.75419	1.99245e-06	8.78183e-06
ACA1_055350	0.0420499	0	0.156099	0	1	NA
ACA1_055360	0	NA	NA	NA	NA	NA
ACA1_055370	0.0375657	0	0.156077	0	1	NA
ACA1_055380	0.375821	0.060667	0.362051	0.167565	0.866925	NA
ACA1_055390	69.5926	-0.021396	0.353023	-0.060608	0.951671	0.965572
ACA1_055400	18.2541	0.321596	0.451308	0.712587	0.476101	0.559018
ACA1_055410	41.5282	-1.14376	0.340197	-3.36207	0.000773611	0.00200919
ACA1_055420	122.489	1.53493	0.213561	7.1873	6.60873e-13	8.3464e-12
ACA1_055430	615.632	0.589052	0.178883	3.29295	0.00099142	0.00250771
ACA1_055440	415.01	-0.476335	0.20027	-2.37847	0.0173848	0.0327051
ACA1_055450	442.18	-0.51719	0.173692	-2.97763	0.00290483	0.00661137
ACA1_055460	171.344	0.811832	0.237293	3.42123	0.000623396	0.00165187
ACA1_055470	158.074	2.28272	0.266666	8.5602	1.1267e-17	2.74512e-16
ACA1_055480	142.155	-0.0747848	0.14698	-0.508808	0.610887	0.684034
ACA1_055490	284.728	0.12215	0.102411	1.19275	0.232969	0.309782
ACA1_055500	4.85507	0.142391	0.520592	0.273518	0.784455	0.833736
ACA1_055510	616.973	-0.460281	0.158074	-2.91181	0.00359337	0.00799461
ACA1_055520	475.227	-0.0202879	0.156075	-0.129988	0.896576	0.92421
ACA1_055530	0.332839	-0.194991	0.385798	-0.505422	0.613262	NA
ACA1_055540	392.907	0.474909	0.197712	2.40202	0.0163047	0.030854
ACA1_055550	45.3437	0.508443	0.220697	2.3038	0.0212337	0.0390162
ACA1_055560	10.8408	0.258504	0.391554	0.660198	0.509127	0.590643
ACA1_055570	153.679	-0.468803	0.308013	-1.52202	0.128004	0.18662
ACA1_055580	162.616	-0.0516868	0.126054	-0.410037	0.681779	0.74556
ACA1_055590	85.3968	1.88855	0.240878	7.84028	4.4953e-15	7.74114e-14
ACA1_055600	284.296	-0.262861	0.155268	-1.69295	0.0904655	0.138988
ACA1_055610	27.2399	-1.73052	0.29492	-5.86778	4.41675e-09	3.10074e-08
ACA1_055620	515.854	-0.0540505	0.137314	-0.393628	0.693855	0.756476
ACA1_055630	222.319	0.218505	0.16013	1.36455	0.172395	0.240514
ACA1_055640	982.801	0.525669	0.228249	2.30305	0.0212759	0.0390788
ACA1_055650	590.361	-0.121154	0.0958971	-1.26337	0.206456	0.279898
ACA1_055660	349.218	1.4054	0.214902	6.53974	6.16278e-11	5.79309e-10
ACA1_055670	6.85509	1.42147	0.436474	3.2567	0.00112714	0.00281502
ACA1_055680	1.56609	2.62882	0.574488	4.57593	4.74105e-06	1.94765e-05
ACA1_055790	14.6973	-0.0277373	0.373855	-0.0741927	0.940857	0.957964
ACA1_055800	12.9857	1.09318	0.349622	3.12675	0.00176751	0.00423921
ACA1_055810	0.320912	0.0549265	0.165591	0.3317	0.740116	NA
ACA1_055820	199.753	-0.143903	0.164198	-0.876399	0.380813	0.466468
ACA1_055830	33.8114	-0.023455	0.305472	-0.0767828	0.938796	0.95639
ACA1_055840	163.21	-1.75215	0.268599	-6.52329	6.87803e-11	6.4278e-10
ACA1_055950	450.551	-0.646576	0.16935	-3.81799	0.000134541	0.000413408
ACA1_055960	0.954922	-0.227891	0.541654	-0.420731	0.673951	0.738641
ACA1_055970	5.66027	0.771969	0.479864	1.60872	0.107677	0.161381
ACA1_055980	0.416682	-0.750735	0.496075	-1.51335	0.130191	0.189414
ACA1_055990	0.588871	-0.43304	0.433787	-0.998278	0.318144	0.402253
ACA1_056090	28.0851	-1.31018	0.296091	-4.42491	9.64835e-06	3.76348e-05
ACA1_056300	100.16	0.382358	0.220236	1.73613	0.0825407	0.128521
ACA1_056310	116.045	1.29541	0.156586	8.27279	1.30859e-16	2.79682e-15
ACA1_056320	58.825	0.0712238	0.189752	0.375353	0.707398	0.768054
ACA1_056430	135.834	0.0750982	0.129056	0.581905	0.56063	0.637794
ACA1_056540	19.0079	-2.17295	0.415231	-5.23311	1.66686e-07	8.98611e-07
ACA1_056550	0.427004	-0.319374	0.473585	-0.674375	0.500073	0.582055
ACA1_056560	0	NA	NA	NA	NA	NA
ACA1_056670	5.85134	1.63369	0.550028	2.97019	0.00297616	0.00675243
ACA1_056770	0	NA	NA	NA	NA	NA
ACA1_056880	0	NA	NA	NA	NA	NA
ACA1_056890	0	NA	NA	NA	NA	NA
ACA1_056900	0	NA	NA	NA	NA	NA
ACA1_056910	0	NA	NA	NA	NA	NA
ACA1_056920	0	NA	NA	NA	NA	NA
ACA1_056930	0.0171837	0.126643	0.157106	0.806099	0.420186	NA
ACA1_056940	0.0443986	0	0.156099	0	1	NA
ACA1_056950	0	NA	NA	NA	NA	NA
ACA1_056960	0	NA	NA	NA	NA	NA
ACA1_056970	0.25457	0.121097	0.166711	0.726389	0.4676	NA
ACA1_056980	0	NA	NA	NA	NA	NA
ACA1_056990	0	NA	NA	NA	NA	NA
ACA1_057000	0	NA	NA	NA	NA	NA
ACA1_057010	0	NA	NA	NA	NA	NA
ACA1_057020	0	NA	NA	NA	NA	NA
ACA1_057030	0.02155	0	0.157399	0	1	NA
ACA1_057040	4.84212	-1.03717	0.461412	-2.24782	0.0245879	0.0442785
ACA1_057050	3.99316	-1.92056	0.521514	-3.68267	0.000230801	0.000673931
ACA1_057060	842.747	-0.711577	0.149741	-4.75204	2.01376e-06	8.87035e-06
ACA1_057070	77.5348	-0.376066	0.221496	-1.69785	0.089537	0.137826
ACA1_057080	185.271	0.305607	0.168056	1.81848	0.0689905	0.109933
ACA1_057090	167.232	0.867904	0.185496	4.67883	2.88523e-06	1.23294e-05
ACA1_057100	532.852	0.632454	0.133242	4.74664	2.06825e-06	9.08545e-06
ACA1_057110	116.549	-0.919849	0.344273	-2.67186	0.00754328	0.015525
ACA1_057120	141.596	-0.754538	0.191649	-3.93709	8.24756e-05	0.000265925
ACA1_057130	74.8878	-0.0621531	0.153411	-0.40514	0.685375	0.748869
ACA1_057140	203.151	0.846486	0.167041	5.06754	4.02983e-07	2.02444e-06
ACA1_057150	242.362	0.528124	0.130287	4.05353	5.04499e-05	0.000170105
ACA1_057160	88.3658	1.33816	0.166184	8.05227	8.12729e-16	1.55116e-14
ACA1_057170	86.4481	-0.552362	0.225465	-2.44988	0.0142905	0.0274341
ACA1_057180	3693.36	-1.11894	0.274455	-4.07694	4.56314e-05	0.000155491
ACA1_057190	354.66	-0.123363	0.360945	-0.341777	0.732519	0.790457
ACA1_057200	177.544	0.0573042	0.211108	0.271445	0.786049	0.835122
ACA1_057210	53.3785	0.35062	0.283657	1.23607	0.216432	0.291291
ACA1_057220	61.6277	0.39458	0.260914	1.5123	0.130458	0.189758
ACA1_057230	218.43	0.809511	0.203714	3.97377	7.07432e-05	0.000231192
ACA1_057240	195.277	1.44292	0.223487	6.45641	1.07214e-10	9.74843e-10
ACA1_057250	1630.12	-1.4032	0.16125	-8.70203	3.25986e-18	8.45575e-17
ACA1_057260	1065.8	0.366963	0.183389	2.00101	0.0453916	0.076187
ACA1_057270	0.298291	0.337609	0.290886	1.16062	0.245796	NA
ACA1_057280	34.1674	-0.267689	0.25814	-1.03699	0.299741	0.382499
ACA1_057290	32.9783	-0.993316	0.284963	-3.48578	0.000490713	0.00133409
ACA1_057300	350.88	0.0939328	0.193234	0.486109	0.62689	0.697951
ACA1_057310	28.0321	0.114434	0.29783	0.384225	0.700812	0.762679
ACA1_057320	91.67	0.900237	0.145597	6.18306	6.28717e-10	5.07186e-09
ACA1_057330	64.5907	-0.0880252	0.564994	-0.155798	0.876192	0.908803
ACA1_057340	33.8944	0.336824	0.243113	1.38546	0.165911	0.232827
ACA1_057350	18.0476	0.663275	0.324944	2.0412	0.0412311	0.0700749
ACA1_057360	219.563	0.293694	0.157514	1.86456	0.0622438	0.100402
ACA1_057370	188.499	-1.03951	0.239696	-4.33677	1.4459e-05	5.45866e-05
ACA1_057380	116.489	0.38956	0.570103	0.683315	0.494408	0.57667
ACA1_057390	214.297	0.0971383	0.163473	0.594218	0.552366	0.630279
ACA1_057400	257.555	-0.0940671	0.486787	-0.193241	0.84677	0.885728
ACA1_057410	41.7312	-1.8547	0.524216	-3.53805	0.000403089	0.00111568
ACA1_057420	597.417	2.37602	0.324274	7.3272	2.35019e-13	3.20637e-12
ACA1_057430	210.273	0.436884	0.125057	3.49349	0.000476759	0.0013004
ACA1_057440	276.686	0.309298	0.128857	2.40032	0.0163808	0.0309777
ACA1_057450	90.6748	-1.44074	0.177802	-8.10308	5.35866e-16	1.04202e-14
ACA1_057460	191.831	-0.347262	0.387746	-0.89559	0.370472	0.456237
ACA1_057470	19.4965	0.174214	0.331042	0.526258	0.598709	0.673111
ACA1_057480	0.120266	-0.143618	0.164184	-0.87474	0.381716	NA
ACA1_057490	408.827	0.104754	0.0986957	1.06138	0.288517	0.370567
ACA1_057500	135.446	-1.54464	0.566181	-2.72817	0.00636862	0.0133334
ACA1_057510	214.76	-0.622735	0.200041	-3.11304	0.00185173	0.00441117
ACA1_057520	179.873	-0.275993	0.15778	-1.74923	0.0802508	0.125388
ACA1_057530	775.502	-0.28519	0.10755	-2.65169	0.00800891	0.0163644
ACA1_057540	1.45428	1.18475	0.570661	2.0761	0.0378849	0.064984
ACA1_057550	3.4813	-0.784702	0.534841	-1.46717	0.14233	0.204412
ACA1_057560	0.104072	0	0.163133	0	1	NA
ACA1_057570	0.53194	-0.333375	0.528336	-0.63099	0.528047	0.607761
ACA1_057780	0	NA	NA	NA	NA	NA
ACA1_057790	792.606	0.222441	0.194291	1.14489	0.252255	0.331296
ACA1_057800	619.332	0.31582	0.235494	1.3411	0.179889	0.249212
ACA1_057810	165.515	-0.230734	0.251093	-0.918917	0.358139	0.443696
ACA1_057820	127.147	0.118561	0.158197	0.749449	0.453587	0.53721
ACA1_057830	344.924	-0.335479	0.253349	-1.32418	0.185444	0.255804
ACA1_057840	99.7036	0.146194	0.186121	0.78548	0.432172	0.516505
ACA1_057850	76.1985	-0.0337846	0.246145	-0.137255	0.890829	0.920454
ACA1_057860	175.78	-0.741828	0.147454	-5.03091	4.88156e-07	2.41454e-06
ACA1_057870	28.9101	-1.30302	0.384904	-3.38532	0.000710956	0.00185997
ACA1_057880	59.1647	0.591422	0.403912	1.46423	0.14313	0.205479
ACA1_057890	0.187043	0	0.165287	0	1	NA
ACA1_057900	0.785617	0	0.482767	0	1	1
ACA1_057910	0.0200982	0	0.15722	0	1	NA
ACA1_057920	0	NA	NA	NA	NA	NA
ACA1_057930	100.594	1.51242	0.192589	7.85309	4.05899e-15	7.02326e-14
ACA1_057940	2331.26	-0.0916457	0.145056	-0.631798	0.527519	0.607298
ACA1_057950	243.217	0.919513	0.216926	4.23884	2.24681e-05	8.13989e-05
ACA1_057960	582.075	-0.269049	0.228466	-1.17763	0.238943	0.316604
ACA1_057970	455.3	-0.383556	0.24978	-1.53558	0.124642	0.182492
ACA1_057980	169.937	-0.0868813	0.18486	-0.469985	0.638366	0.708489
ACA1_057990	158.321	-0.105902	0.21337	-0.496331	0.619661	0.691555
ACA1_058000	84.6416	0.9537	0.246558	3.86806	0.000109706	0.000344499
ACA1_058010	268.184	0.258067	0.118368	2.18021	0.0292417	0.0517496
ACA1_058020	849.969	-0.282709	0.133836	-2.11235	0.0346561	0.0601527
ACA1_058030	77.049	-0.124184	0.199967	-0.621025	0.534583	0.614012
ACA1_058040	61.1063	0.459938	0.572799	0.802966	0.421994	0.507067
ACA1_058050	316.132	-0.224023	0.518839	-0.431776	0.665904	0.731877
ACA1_058060	218.588	-1.19958	0.16772	-7.15229	8.53406e-13	1.05205e-11
ACA1_058070	322.84	-1.3115	0.314613	-4.16862	3.06453e-05	0.000107938
ACA1_058080	42.7813	1.14328	0.24158	4.73251	2.21759e-06	9.68553e-06
ACA1_058090	442.499	0.361326	0.145951	2.47567	0.0132985	0.0257177
ACA1_058100	163.042	0.574654	0.180422	3.18506	0.00144725	0.00353207
ACA1_058110	128.059	1.29854	0.552955	2.34836	0.0188561	0.0351707
ACA1_058120	919.059	-1.49798	0.157776	-9.49429	2.2171e-21	8.3855e-20
ACA1_058130	107.359	-0.0954923	0.190235	-0.50197	0.615689	0.688065
ACA1_058140	257.154	0.0758439	0.22186	0.341855	0.73246	0.790452
ACA1_058150	74.7278	-1.41763	0.287594	-4.92926	8.25421e-07	3.90366e-06
ACA1_058160	0.403004	-0.00623938	0.166933	-0.0373765	0.970185	0.9805
ACA1_058170	101.646	0.373298	0.154188	2.42106	0.0154752	0.0294425
ACA1_058180	1.06862	0.703466	0.554298	1.26911	0.204401	0.277663
ACA1_058190	131.357	0.140793	0.152989	0.920282	0.357425	0.443079
ACA1_058200	149.005	-1.17153	0.178719	-6.55514	5.55889e-11	5.2631e-10
ACA1_058210	165.804	0.349236	0.135718	2.57325	0.0100749	0.0201025
ACA1_058220	167.31	0.306674	0.2494	1.22965	0.218828	0.293832
ACA1_058230	102.939	-0.587995	0.44998	-1.30671	0.19131	0.262592
ACA1_058240	281.465	-2.17794	0.443124	-4.91497	8.87955e-07	4.16396e-06
ACA1_058250	0.658093	0.192243	0.538069	0.357283	0.72088	0.77982
ACA1_058260	40.4032	-2.28318	0.394611	-5.7859	7.21265e-09	4.84015e-08
ACA1_058270	88.3233	0.815499	0.239318	3.4076	0.000655378	0.0017298
ACA1_058280	201.098	-0.422831	0.135613	-3.11792	0.0018213	0.00434872
ACA1_058290	267.775	1.38896	0.129522	10.7237	7.87882e-27	5.72026e-25
ACA1_058300	487.963	-0.30424	0.0817552	-3.72135	0.000198162	0.000588863
ACA1_058310	935.111	-2.08252	0.329264	-6.32479	2.53571e-10	2.18983e-09
ACA1_058320	61.4273	-1.49728	0.46006	-3.25452	0.00113584	0.00283478
ACA1_058330	28.0343	0.19997	0.217392	0.919863	0.357644	0.443243
ACA1_058340	383.592	1.08017	0.0937979	11.5159	1.09654e-30	1.13163e-28
ACA1_058350	947.05	-0.148243	0.114041	-1.29991	0.193631	0.265253
ACA1_058360	0.232373	0	0.274541	0	1	NA
ACA1_058370	225.701	-0.586957	0.281234	-2.08708	0.0368809	0.0635335
ACA1_058380	1.60457	-2.07872	0.560685	-3.70746	0.000209346	0.000617389
ACA1_058390	188.698	-0.0943754	0.25406	-0.371468	0.710289	0.770555
ACA1_058400	0.0467759	-0.0357634	0.160066	-0.223429	0.823202	NA
ACA1_058410	75.278	-1.35415	0.242101	-5.59333	2.22757e-08	1.3801e-07
ACA1_058420	113.059	-0.407097	0.175679	-2.31727	0.0204888	0.0378351
ACA1_058430	3.81396	-3.0983	0.526591	-5.8837	4.01195e-09	2.8428e-08
ACA1_058440	58.8429	-0.00800986	0.237837	-0.033678	0.973134	0.982724
ACA1_058450	715.371	-0.95325	0.144358	-6.60337	4.01926e-11	3.87652e-10
ACA1_058460	2.81992	-1.89066	0.555064	-3.40621	0.000658721	0.00173628
ACA1_058470	0	NA	NA	NA	NA	NA
ACA1_058480	0	NA	NA	NA	NA	NA
ACA1_058490	0	NA	NA	NA	NA	NA
ACA1_058500	51.5977	-0.339365	0.388394	-0.873766	0.382246	0.467786
ACA1_058510	115.234	0.802046	0.170655	4.6998	2.6041e-06	1.12143e-05
ACA1_058520	747.224	1.08685	0.252762	4.2999	1.70875e-05	6.34981e-05
ACA1_058530	451.458	0.216242	0.110701	1.95338	0.050775	0.0840028
ACA1_058540	249.546	-1.04678	0.397654	-2.63239	0.00847865	0.0172122
ACA1_058550	192.606	-0.345666	0.252162	-1.37081	0.170434	0.238331
ACA1_058560	305.714	-0.318807	0.120926	-2.63638	0.00837962	0.0170375
ACA1_058570	127.762	-0.505212	0.19247	-2.62488	0.00866789	0.0175422
ACA1_058580	17.0113	-0.0300312	0.435356	-0.0689808	0.945005	0.960772
ACA1_058590	785.25	-0.193437	0.109543	-1.76586	0.0774199	0.121583
ACA1_058700	187.692	-0.199385	0.227263	-0.87733	0.380307	0.465967
ACA1_058710	6353.97	-0.218205	0.138196	-1.57895	0.114347	0.169828
ACA1_058720	381.28	-0.471942	0.128313	-3.67807	0.000235008	0.000684557
ACA1_058730	361.657	0.897498	0.225975	3.97168	7.13687e-05	0.000233025
ACA1_058740	9375.51	-1.48375	0.225968	-6.56621	5.16108e-11	4.90897e-10
ACA1_058750	142.269	0.571672	0.157621	3.62687	0.000286875	0.000819934
ACA1_058760	2710.22	-2.152	0.307592	-6.99631	2.62799e-12	3.01582e-11
ACA1_058770	6720.17	-1.18455	0.128388	-9.22639	2.79904e-20	9.29666e-19
ACA1_058780	208.569	0.163892	0.125892	1.30184	0.192971	0.264545
ACA1_058790	5429.9	-0.265042	0.103131	-2.56996	0.010171	0.0202746
ACA1_058800	642.801	-0.671999	0.131621	-5.10555	3.29831e-07	1.68866e-06
ACA1_058810	4525.94	-0.725033	0.17692	-4.09808	4.16593e-05	0.000143172
ACA1_058820	542.544	-0.358046	0.13902	-2.57549	0.0100097	0.019989
ACA1_058830	319.378	-0.220264	0.171463	-1.28461	0.198928	0.271476
ACA1_058840	1565.43	1.91364	0.411577	4.64952	3.32715e-06	1.40599e-05
ACA1_058850	5242.96	0.469204	0.253004	1.85453	0.0636632	0.102383
ACA1_058860	448.905	-0.0461212	0.157254	-0.29329	0.769301	0.8214
ACA1_058870	7.14124	0.874203	0.445459	1.96248	0.0497071	0.0825386
ACA1_058880	4.91648	0.428221	0.509922	0.839778	0.401033	0.48588
ACA1_058890	1032.21	0.49036	0.136553	3.59098	0.000329442	0.000929643
ACA1_058900	81.7204	-1.111	0.292222	-3.80192	0.000143581	0.000438113
ACA1_058910	101.431	0.507829	0.153443	3.30957	0.000934386	0.00238179
ACA1_058920	3.89879	0.0320353	0.571919	0.0560137	0.955331	0.967994
ACA1_058930	21.683	0.262085	0.332521	0.788175	0.430594	0.515002
ACA1_058940	131.135	0.428762	0.178877	2.39697	0.0165312	0.03125
ACA1_059050	6.72135	-1.24844	0.457836	-2.72682	0.00639481	0.0133805
ACA1_059160	0	NA	NA	NA	NA	NA
ACA1_059170	0.0408599	0	0.156094	0	1	NA
ACA1_059280	0	NA	NA	NA	NA	NA
ACA1_059290	30.645	-1.63793	0.332438	-4.92701	8.34978e-07	3.94499e-06
ACA1_059300	152.663	-0.911556	0.174881	-5.21245	1.86364e-07	9.9394e-07
ACA1_059310	3.50163	-2.15919	0.521522	-4.14017	3.47054e-05	0.000121234
ACA1_059420	0.996004	-1.30446	0.563178	-2.31625	0.0205447	0.0379288
ACA1_059430	83.1625	-1.27158	0.346314	-3.67176	0.000240886	0.00069928
ACA1_059440	145.229	1.20962	0.264654	4.57056	4.8642e-06	1.99427e-05
ACA1_059450	187.129	0.819109	0.236491	3.46359	0.00053301	0.00143728
ACA1_059460	7736.42	-1.24916	0.137485	-9.08574	1.02995e-19	3.22094e-18
ACA1_059470	120.6	0.618218	0.132829	4.65425	3.25168e-06	1.37611e-05
ACA1_059480	45.1437	-2.37003	0.531922	-4.45559	8.36627e-06	3.29722e-05
ACA1_059490	2652.55	0.526482	0.107175	4.91238	8.99796e-07	4.21675e-06
ACA1_059500	238.389	-0.265599	0.266404	-0.996978	0.318775	0.402875
ACA1_059510	270.924	-1.20333	0.234413	-5.13336	2.84621e-07	1.47127e-06
ACA1_059520	37.352	-0.321422	0.375676	-0.855585	0.392227	0.477253
ACA1_059530	306.026	1.00837	0.160175	6.29544	3.06527e-10	2.61744e-09
ACA1_059540	885.884	0.0629457	0.0797833	0.788958	0.430136	0.514694
ACA1_059550	81.5342	-0.641501	0.179479	-3.57423	0.000351253	0.000984273
ACA1_059560	0	NA	NA	NA	NA	NA
ACA1_059570	53.8825	-0.775038	0.285109	-2.71839	0.00656001	0.0136887
ACA1_059580	156.931	-0.517664	0.215064	-2.40702	0.0160831	0.0304688
ACA1_059590	172.753	-0.443251	0.193794	-2.28722	0.0221829	0.0405027
ACA1_059600	1969.46	-2.2111	0.171609	-12.8845	5.50194e-38	1.15206e-35
ACA1_059610	596.491	-1.47152	0.228789	-6.43177	1.2613e-10	1.13258e-09
ACA1_059620	153.832	1.29409	0.272139	4.75527	1.98179e-06	8.73752e-06
ACA1_059730	77.3518	-0.388233	0.190159	-2.04163	0.0411887	0.0700112
ACA1_059740	1965.92	0.301568	0.109714	2.74866	0.00598399	0.0126196
ACA1_059750	17.5544	0.537643	0.335303	1.60345	0.108835	0.162846
ACA1_059760	147.87	0.619493	0.193641	3.19919	0.00137815	0.00337885
ACA1_059770	116.884	-0.41742	0.211133	-1.97705	0.0480362	0.0801417
ACA1_059780	0.159479	-0.108741	0.164846	-0.659651	0.509478	NA
ACA1_059790	3.26041	1.65546	0.524624	3.15552	0.00160211	0.00387596
ACA1_059800	68.2367	2.64855	0.189106	14.0057	1.43912e-44	5.61959e-42
ACA1_059810	28.3588	-0.58327	0.370154	-1.57575	0.115084	0.170537
ACA1_059820	448.854	-0.499795	0.165391	-3.02191	0.00251186	0.00579549
ACA1_059830	169.095	-0.816848	0.225631	-3.62029	0.000294277	0.000838769
ACA1_059840	575.846	-0.650047	0.178494	-3.64184	0.000270692	0.000777528
ACA1_059850	451.87	1.00617	0.164075	6.13241	8.65552e-10	6.8336e-09
ACA1_059860	458.477	0.334873	0.0762888	4.38954	1.1359e-05	4.3694e-05
ACA1_059870	176.162	-0.578424	0.214083	-2.70187	0.00689507	0.0142927
ACA1_059980	278.831	0.0230234	0.208327	0.110515	0.912001	0.935575
ACA1_059990	126.106	-0.243222	0.192192	-1.26552	0.205686	0.279011
ACA1_060000	151.094	-0.25065	0.247017	-1.01471	0.310245	0.393816
ACA1_060010	453.628	1.79618	0.205284	8.74973	2.13857e-18	5.67979e-17
ACA1_060020	148.519	0.87787	0.23252	3.77546	0.000159713	0.000482546
ACA1_060030	133.041	0.0638724	0.165279	0.386452	0.699162	0.761285
ACA1_060040	31.6659	-0.51218	0.382264	-1.33986	0.18029	0.249622
ACA1_060050	0.256585	0.062376	0.361428	0.172582	0.86298	NA
ACA1_060060	0	NA	NA	NA	NA	NA
ACA1_060070	0	NA	NA	NA	NA	NA
ACA1_060080	0.0420499	0	0.156099	0	1	NA
[truncated: 13,656 more rows]

## Sheet: WTvsDotA.8hr.results
	baseMean	log2FoldChange	lfcSE	stat	pvalue	padj
ACA1_000210	474.682	-0.583034	0.205053	-2.84333	0.00446444	0.011567
ACA1_000220	109.069	-0.26872	0.185504	-1.4486	0.14745	0.226585
ACA1_000330	344.708	0.331584	0.112204	2.9552	0.00312465	0.00849388
ACA1_000530	312.525	-0.615163	0.181493	-3.38946	0.000700301	0.00230635
ACA1_000540	312.325	-0.321426	0.144342	-2.22684	0.025958	0.0526522
ACA1_000550	1839.42	0.769838	0.291492	2.64103	0.00826555	0.0196999
ACA1_000560	8.36131	1.25234	0.549013	2.28107	0.0225444	0.0466049
ACA1_000570	130.502	0.136025	0.148513	0.915912	0.359713	0.466216
ACA1_000580	316.421	-1.01913	0.197453	-5.16137	2.45145e-07	1.8981e-06
ACA1_000590	267.555	-2.12383	0.381767	-5.56316	2.64927e-08	2.563e-07
ACA1_000790	185.929	0.749905	0.18242	4.11086	3.94183e-05	0.000182012
ACA1_000800	1.81038	-0.398326	0.576109	-0.691408	0.489309	0.591659
ACA1_000810	26.9131	0.0163339	0.313134	0.0521626	0.958399	0.975206
ACA1_000820	746.246	0.0538588	0.130365	0.413138	0.679505	0.761027
ACA1_000830	14.2343	-0.120441	0.553443	-0.217621	0.827724	0.87758
ACA1_000840	992.591	-0.226226	0.0897214	-2.52143	0.011688	0.0265682
ACA1_001040	5.39668	-0.629314	0.522629	-1.20413	0.228538	0.32429
ACA1_001250	192.787	-0.282808	0.235237	-1.20223	0.229276	0.325209
ACA1_001260	236.26	0.424168	0.130618	3.2474	0.00116466	0.00359858
ACA1_001270	25.7717	1.53451	0.50055	3.06564	0.00217205	0.00619311
ACA1_001280	57.8928	0.49852	0.220499	2.26087	0.0237675	0.0487429
ACA1_001290	249.042	0.145954	0.22182	0.657985	0.510548	0.611338
ACA1_001300	181.633	0.161457	0.171775	0.939932	0.347252	0.453093
ACA1_001310	32.2655	-0.0352989	0.274785	-0.12846	0.897785	0.931003
ACA1_001510	43.8373	0.64751	0.260114	2.48933	0.0127985	0.0287354
ACA1_001520	465.003	-0.411288	0.14307	-2.87473	0.00404376	0.0106284
ACA1_001530	559.875	0.512803	0.127956	4.00766	6.13225e-05	0.000270118
ACA1_001540	141.604	0.499315	0.21218	2.35327	0.0186093	0.0394349
ACA1_001550	8.78529	-0.926851	0.433297	-2.13906	0.0324304	0.0637663
ACA1_001660	894.437	0.800118	0.331999	2.41	0.0159524	0.0346326
ACA1_001860	50.3718	-0.936588	0.265084	-3.53318	0.000410596	0.001459
ACA1_001870	365.637	-0.584873	0.13959	-4.18992	2.79047e-05	0.000133499
ACA1_001980	60.8432	-0.580378	0.361912	-1.60364	0.108792	0.176215
ACA1_001990	28.7859	0.318632	0.313303	1.01701	0.309149	0.413113
ACA1_002090	1.27712	-0.199637	0.568559	-0.351127	0.725493	0.796256
ACA1_002200	51.8478	0.630541	0.236756	2.66326	0.00773881	0.0186258
ACA1_002300	5711.62	0.0137859	0.202533	0.0680674	0.945732	0.966059
ACA1_002310	0.366621	0.158098	0.383488	0.412263	0.680147	NA
ACA1_002320	564.145	0.424636	0.16819	2.52474	0.0115784	0.0263648
ACA1_002330	331.525	-0.563798	0.134407	-4.1947	2.73237e-05	0.000131115
ACA1_002430	383.813	1.91533	0.257563	7.43636	1.03494e-13	2.90911e-12
ACA1_002440	16.5323	0.911072	0.372435	2.44626	0.0144348	0.0318744
ACA1_002450	35.144	0.481007	0.323759	1.4857	0.13736	0.213965
ACA1_002460	23.6142	0.802824	0.327428	2.45191	0.0142099	0.0314403
ACA1_002470	18.7867	0.592491	0.330249	1.79407	0.0728012	0.125592
ACA1_002480	16.0921	0.441227	0.471642	0.935514	0.349524	0.455522
ACA1_002490	334.898	0.30229	0.146437	2.06431	0.0389887	0.0745709
ACA1_002500	2532.22	0.378045	0.118348	3.19436	0.00140142	0.00422357
ACA1_002510	2779.56	1.38055	0.169977	8.12199	4.58591e-16	1.97783e-14
ACA1_002610	502.497	1.24555	0.302882	4.11233	3.91691e-05	0.000180977
ACA1_002620	392.14	-0.264273	0.0960744	-2.75071	0.00594659	0.0148413
ACA1_002630	82.8779	-1.25451	0.263591	-4.75929	1.94275e-06	1.23055e-05
ACA1_002730	0	NA	NA	NA	NA	NA
ACA1_002740	403.144	-0.791885	0.536713	-1.47543	0.140096	0.217435
ACA1_002750	183.995	-0.158159	0.16937	-0.933803	0.350405	0.456506
ACA1_002760	83.4765	1.0292	0.222941	4.61646	3.90339e-06	2.31037e-05
ACA1_002770	495.519	-1.2291	0.222421	-5.52602	3.27585e-08	3.08335e-07
ACA1_002780	64.5575	0.134399	0.231824	0.579745	0.562087	0.658053
ACA1_002790	78.6123	0.212406	0.2303	0.9223	0.356372	0.462777
ACA1_002890	0.0360616	0	0.165007	0	1	NA
ACA1_003000	1.17976	-0.372543	0.533295	-0.698567	0.484823	0.587502
ACA1_003110	258.596	1.69735	0.347001	4.8915	1.0007e-06	6.74979e-06
ACA1_003220	129.484	1.37461	0.358979	3.82923	0.000128546	0.000525234
ACA1_003530	5.11122	1.68158	0.532288	3.15915	0.00158228	0.00468652
ACA1_003640	3.96802	0	0.566798	0	1	1
ACA1_003650	459.079	-0.760673	0.187282	-4.06165	4.87274e-05	0.00021973
ACA1_003850	26.4101	1.11117	0.33823	3.28526	0.0010189	0.00320651
ACA1_003860	17.4729	0.383503	0.334003	1.1482	0.250885	0.349781
ACA1_003870	80.4446	-0.939845	0.437178	-2.1498	0.0315709	0.062276
ACA1_004080	59.1242	-0.949327	0.453957	-2.09123	0.0365077	0.0705353
ACA1_004190	126.271	0.000500102	0.171061	0.00292352	0.997667	1
ACA1_004200	142.603	-0.137166	0.150652	-0.910483	0.362568	0.469097
ACA1_004400	76.0031	0.706404	0.253667	2.78477	0.00535653	0.0135323
ACA1_004410	39.1029	-0.385018	0.252436	-1.52521	0.127206	0.200554
ACA1_004520	10.4719	0.290528	0.401523	0.723566	0.469332	0.572664
ACA1_004630	38.9611	-0.18945	0.280027	-0.676542	0.498697	0.600731
ACA1_004640	5.01327	-0.0530866	0.522376	-0.101625	0.919054	0.946988
ACA1_004750	1163.73	-0.505834	0.161607	-3.13002	0.00174795	0.00510395
ACA1_004850	45.2078	-0.407062	0.252269	-1.6136	0.106613	0.173166
ACA1_004860	85.6644	0.466722	0.237197	1.96766	0.0491076	0.0905058
ACA1_004870	28.4095	0.52739	0.278614	1.89291	0.0583702	0.104528
ACA1_004980	4.86602	0.0329643	0.526457	0.0626153	0.950073	0.968781
ACA1_004990	128.888	1.23331	0.215429	5.72491	1.03491e-08	1.09702e-07
ACA1_005000	399.671	-0.343249	0.132658	-2.58747	0.00966839	0.0225487
ACA1_005010	21.718	0.212997	0.373502	0.57027	0.568495	0.66378
ACA1_005220	59.6446	-1.01935	0.471084	-2.16384	0.0304764	0.0603927
ACA1_005320	843.326	0.167106	0.173737	0.96183	0.336135	0.441337
ACA1_005430	0	NA	NA	NA	NA	NA
ACA1_005830	172.874	0.518075	0.161752	3.2029	0.00136051	0.00411141
ACA1_005940	0.0689778	-0.0136221	0.165522	-0.0822979	0.93441	NA
ACA1_006050	370.972	0.560531	0.161953	3.46107	0.000538035	0.00184163
ACA1_006060	122.09	0.108543	0.260714	0.416328	0.67717	0.759431
ACA1_006070	35.7762	-1.31069	0.40574	-3.23038	0.00123625	0.00378979
ACA1_006080	26.8527	-1.50713	0.495675	-3.04055	0.00236145	0.00667283
ACA1_006090	94.3188	-0.339171	0.305483	-1.11028	0.26688	0.367817
ACA1_006100	152.405	0.0140252	0.14859	0.0943884	0.924801	0.951201
ACA1_006110	267.947	-0.0862386	0.162716	-0.529995	0.596115	0.689455
ACA1_006120	608.771	0.143947	0.104297	1.38017	0.167536	0.251774
ACA1_006130	1132.7	0.634274	0.149863	4.23236	2.31252e-05	0.000113297
ACA1_006140	76.1669	0.625428	0.192254	3.25313	0.0011414	0.00353731
ACA1_006150	810.174	-0.517976	0.149252	-3.47048	0.000519521	0.00178715
ACA1_006160	0.164302	0	0.169488	0	1	NA
ACA1_006170	332.684	0.636569	0.114458	5.56161	2.67292e-08	2.58316e-07
ACA1_006180	23.8433	-0.865972	0.300904	-2.87791	0.00400324	0.0105411
ACA1_006190	26.74	-0.195321	0.296304	-0.659191	0.509773	0.610662
ACA1_006200	55.7106	-0.75823	0.43509	-1.74269	0.0813871	0.137594
ACA1_006210	601.311	0.310749	0.263187	1.18071	0.237716	0.334912
ACA1_006220	11.5316	-0.73623	0.460664	-1.59819	0.11	0.177871
ACA1_006230	122.808	0.824275	0.169429	4.86502	1.14443e-06	7.62317e-06
ACA1_006240	230.042	0.145838	0.138832	1.05047	0.293504	0.396165
ACA1_006250	11.2493	0.147993	0.45952	0.322061	0.747407	0.815045
ACA1_006260	66.017	0.786161	0.192392	4.08626	4.38391e-05	0.000199933
ACA1_006270	85.1422	0.109202	0.199237	0.548104	0.583621	0.677444
ACA1_006570	25.6654	0.00109024	0.296435	0.00367785	0.997066	1
ACA1_006580	257.042	-0.531123	0.162371	-3.27104	0.00107153	0.00334662
ACA1_006680	25.5299	-0.528387	0.346257	-1.526	0.127011	0.200308
ACA1_006790	15.6695	0.374778	0.375165	0.99897	0.317809	0.421954
ACA1_007000	311.05	-0.251893	0.133232	-1.89063	0.0586737	0.104993
ACA1_007010	76.1384	-0.0459231	0.211938	-0.216682	0.828456	0.877991
ACA1_007310	19.6945	0.335547	0.351164	0.955527	0.339311	0.44482
ACA1_007510	18.3913	0.852317	0.388281	2.1951	0.0281561	0.0564294
ACA1_007620	4.1885	2.87524	0.54337	5.29151	1.21312e-07	1.00905e-06
ACA1_007720	38.6363	-0.427491	0.274799	-1.55565	0.119792	0.190633
ACA1_007730	83.7717	-0.607948	0.309865	-1.96198	0.0497649	0.0914879
ACA1_007740	434.488	-0.425876	0.12038	-3.53777	0.000403529	0.00143636
ACA1_007750	691.418	0.498598	0.157916	3.15737	0.001592	0.00471047
ACA1_007760	548.772	0.0986716	0.09998	0.986913	0.323685	0.428496
ACA1_007770	337.807	0.954482	0.491385	1.94243	0.0520849	0.0951235
ACA1_007780	2666.59	0.178324	0.13493	1.3216	0.186303	0.275028
ACA1_007790	263.367	-0.102367	0.126809	-0.807249	0.419523	0.525604
ACA1_007800	280.677	-0.497543	0.152918	-3.25366	0.00113927	0.00353375
ACA1_007810	57.8382	-0.585179	0.242969	-2.40845	0.0160205	0.034744
ACA1_007910	0	NA	NA	NA	NA	NA
ACA1_008410	18.5203	0.632976	0.401893	1.57498	0.11526	0.18462
ACA1_008610	30.3767	0.0530284	0.268963	0.197159	0.843703	0.890418
ACA1_008620	18.3727	-1.74996	0.484512	-3.6118	0.000304081	0.00111365
ACA1_008730	0.262901	-0.291695	0.360719	-0.808649	0.418717	NA
ACA1_008740	2.55437	-0.525296	0.576096	-0.911821	0.361863	0.468519
ACA1_008840	8.08409	0.0241049	0.565967	0.0425907	0.966028	0.981034
ACA1_008950	3.74342	0.0800088	0.54986	0.145508	0.88431	0.920507
ACA1_009060	3.02195	0.52509	0.56922	0.922473	0.356282	0.462702
ACA1_009160	246.476	0.487577	0.16581	2.94058	0.00327597	0.00885357
ACA1_009170	758.123	0.148522	0.199765	0.743483	0.457189	0.561684
ACA1_009280	53.1568	0.148983	0.312223	0.477169	0.633241	0.72239
ACA1_009480	213.116	0.370136	0.162058	2.28397	0.0223731	0.0462839
ACA1_009790	0.0696187	0	0.165776	0	1	NA
ACA1_009890	1041.95	-0.0047175	0.122932	-0.038375	0.969389	0.983655
ACA1_009900	770.115	1.42527	0.136859	10.4141	2.13732e-25	3.54942e-23
ACA1_009910	761.107	-0.876517	0.153366	-5.71521	1.09566e-08	1.15632e-07
ACA1_009920	152.662	-0.044015	0.15926	-0.276371	0.782263	0.842222
ACA1_009930	617.302	0.719885	0.321403	2.23982	0.0251027	0.0511181
ACA1_009940	282.068	0.680674	0.318697	2.1358	0.0326955	0.0641786
ACA1_010050	24.8488	-0.16874	0.302049	-0.55865	0.5764	0.671112
ACA1_010150	134.885	-0.0196428	0.16064	-0.122279	0.902678	0.934836
ACA1_010160	325.529	0.0815087	0.134535	0.605855	0.544611	0.642173
ACA1_010170	78.6711	-0.15928	0.179005	-0.889809	0.373568	0.480445
ACA1_010180	361.465	0.601614	0.133321	4.51251	6.40658e-06	3.61289e-05
ACA1_010190	209.351	-0.401546	0.185617	-2.16331	0.0305175	0.0604576
ACA1_010390	27.1715	-0.453428	0.29708	-1.52628	0.12694	0.200221
ACA1_010500	54.8304	-0.529328	0.243929	-2.17001	0.0300063	0.059581
ACA1_010610	60.4395	0.103465	0.223295	0.463355	0.64311	0.729959
ACA1_010620	0	NA	NA	NA	NA	NA
ACA1_010730	20.0117	-0.374267	0.304167	-1.23046	0.218523	0.312838
ACA1_010930	294.93	-0.150827	0.121462	-1.24176	0.214327	0.308211
ACA1_010940	66.8579	0.0422198	0.21335	0.19789	0.843131	0.890202
ACA1_011040	175.167	-0.00529779	0.202187	-0.0262024	0.979096	0.989852
ACA1_011150	301.707	0.231483	0.131	1.76705	0.0772204	0.131784
ACA1_011160	600.388	-0.77336	0.236658	-3.26783	0.00108374	0.00338183
ACA1_011260	1141.53	0.193916	0.0896351	2.16339	0.0305109	0.0604527
ACA1_011270	150.929	2.2773	0.430515	5.2897	1.22517e-07	1.01629e-06
ACA1_011280	1004.31	1.061	0.31635	3.35388	0.000796856	0.00257676
ACA1_011380	2.55674	-0.142848	0.575438	-0.248242	0.803947	0.85913
ACA1_011490	211.769	-0.752988	0.190356	-3.95568	7.63172e-05	0.000329242
ACA1_011600	30.525	-0.557645	0.369361	-1.50976	0.131106	0.205759
ACA1_011810	38.4285	0.102749	0.283335	0.36264	0.716874	0.789327
ACA1_011910	71.7487	0.50161	0.21654	2.31647	0.0205325	0.0429174
ACA1_012020	1402.33	0.462118	0.0942842	4.90132	9.51924e-07	6.457e-06
ACA1_012030	174.079	-0.815514	0.183293	-4.44923	8.61803e-06	4.69154e-05
ACA1_012040	580.936	-0.68616	0.148574	-4.6183	3.86891e-06	2.29561e-05
ACA1_012050	76.5283	0.564822	0.171116	3.30081	0.00096406	0.00304987
ACA1_012250	5.51904	0.0500486	0.522201	0.0958416	0.923646	0.95042
ACA1_012260	242.263	0.588305	0.139455	4.2186	2.45822e-05	0.000119517
ACA1_012270	1085.4	-0.00915051	0.0884145	-0.103496	0.91757	0.946256
ACA1_012280	44.2977	-0.470222	0.238506	-1.97153	0.0486627	0.0898963
ACA1_012290	137.897	1.13142	0.291251	3.88468	0.000102465	0.000427619
ACA1_012300	92.2719	0.120521	0.195389	0.616825	0.53735	0.63553
ACA1_012310	300.258	-0.00109747	0.113212	-0.00969387	0.992266	0.998485
ACA1_012320	19.7424	-0.170054	0.352802	-0.482011	0.629798	0.719485
ACA1_012330	870.548	0.733578	0.116299	6.30771	2.83192e-10	4.11626e-09
ACA1_012630	121.032	0.167187	0.189462	0.882432	0.377543	0.484479
ACA1_012740	395.991	0.144371	0.146386	0.986237	0.324017	0.428777
ACA1_012850	9.00992	-0.527616	0.475387	-1.10987	0.267057	0.367961
ACA1_012960	80.6878	-0.876961	0.237612	-3.69073	0.000223611	0.000847295
ACA1_012970	285.954	-1.77727	0.206926	-8.58891	8.78019e-18	5.05403e-16
ACA1_012980	325.501	-0.657396	0.204484	-3.2149	0.00130491	0.00396327
ACA1_012990	260.531	-0.169319	0.206588	-0.819596	0.412447	0.518953
ACA1_013000	408.26	0.132371	0.166178	0.796563	0.425705	0.53169
ACA1_013010	15.1367	-0.628239	0.385785	-1.62847	0.103425	0.168808
ACA1_013120	38.8982	-0.120062	0.23617	-0.508371	0.611193	0.703011
ACA1_013230	42.1193	-0.407308	0.250374	-1.6268	0.10378	0.169297
ACA1_013240	33.8774	-0.544914	0.329858	-1.65196	0.0985421	0.161954
ACA1_013340	634.86	-0.174914	0.156323	-1.11892	0.263174	0.363616
ACA1_013350	167.782	-0.89695	0.507529	-1.76729	0.0771798	0.131746
ACA1_013360	169.004	0.138104	0.145704	0.947842	0.34321	0.448507
ACA1_013370	31.1488	-0.75294	0.272087	-2.76728	0.0056527	0.0141715
ACA1_013380	380.487	-0.0879585	0.139289	-0.631483	0.527724	0.627175
ACA1_013390	9356.67	-0.517118	0.118466	-4.36511	1.27059e-05	6.64164e-05
ACA1_013490	147.606	-0.101412	0.174732	-0.580386	0.561654	0.6576
ACA1_013500	53.1284	-0.0715996	0.219269	-0.326537	0.744018	0.812085
ACA1_013610	595.697	0.563405	0.10005	5.63121	1.78945e-08	1.79791e-07
ACA1_013620	582.766	0.255638	0.126144	2.02655	0.0427082	0.0806704
ACA1_013630	495.123	0.566363	0.125828	4.50107	6.76117e-06	3.78772e-05
ACA1_013640	537.132	-0.751595	0.10932	-6.87516	6.19212e-12	1.26719e-10
ACA1_013650	17.4329	1.06144	0.376517	2.81909	0.00481596	0.0123087
ACA1_013660	147.939	0.842073	0.156601	5.3772	7.56552e-08	6.62063e-07
ACA1_013670	283.635	-0.478995	0.128993	-3.71334	0.000204538	0.00078324
ACA1_013680	4.45627	-0.295341	0.575834	-0.512893	0.608026	0.700114
ACA1_013980	19.7635	0.407155	0.367079	1.10918	0.267354	0.3683
ACA1_013990	11.2191	-0.597958	0.417084	-1.43366	0.151669	0.232131
ACA1_014100	2230.16	-0.149151	0.109554	-1.36144	0.173376	0.25944
ACA1_014210	819.569	0.624924	0.289926	2.15546	0.031126	0.0615448
ACA1_014220	334.046	-0.843168	0.293839	-2.86949	0.00411132	0.0107728
ACA1_014230	0	NA	NA	NA	NA	NA
ACA1_014240	11.7011	-0.538692	0.442156	-1.21833	0.223099	0.318228
ACA1_014250	207.509	-0.464383	0.213228	-2.17787	0.0294155	0.0586201
ACA1_014350	61.7906	-1.28215	0.262631	-4.88194	1.05046e-06	7.0558e-06
ACA1_014360	1567.65	0.178873	0.0959031	1.86514	0.0621611	0.109823
ACA1_014370	172.851	-0.603284	0.176362	-3.42071	0.000624581	0.00209567
ACA1_014380	644.576	0.284415	0.160604	1.77091	0.0765753	0.130915
ACA1_014390	136.565	-0.0491062	0.139008	-0.353262	0.723892	0.794755
ACA1_014490	653.689	0.463898	0.114804	4.04078	5.32727e-05	0.000238292
ACA1_014500	0.0641089	0	0.165594	0	1	NA
ACA1_014510	383.751	-0.289495	0.185191	-1.56322	0.118	0.188237
ACA1_014520	44.4989	-0.546979	0.344669	-1.58697	0.11252	0.181236
ACA1_014620	242.943	0.223558	0.207832	1.07567	0.282075	0.383569
ACA1_014630	148.45	0.646752	0.16315	3.96416	7.36549e-05	0.00031909
ACA1_014740	1406.93	-0.459781	0.189789	-2.42259	0.0154103	0.0336479
ACA1_014750	30.7969	0.173811	0.290097	0.599148	0.549074	0.645963
ACA1_014760	40.0557	-0.314722	0.249704	-1.26038	0.207532	0.300322
ACA1_014870	432.805	1.01013	0.198821	5.08062	3.76197e-07	2.80749e-06
ACA1_014880	21.0384	-0.110999	0.327077	-0.339366	0.734334	0.803884
ACA1_014980	261.541	-0.0383354	0.172262	-0.222542	0.823892	0.874364
ACA1_014990	125.06	0.378866	0.167395	2.26331	0.0236165	0.0484951
ACA1_015100	18.0847	0.424703	0.329425	1.28922	0.19732	0.288201
ACA1_015210	240.328	0.441171	0.125497	3.5154	0.000439087	0.00154617
ACA1_015310	463.084	0.719406	0.203978	3.52688	0.000420484	0.00149083
ACA1_015320	120.36	-0.256471	0.300136	-0.854515	0.39282	0.499556
ACA1_015330	4185.74	-3.3257	0.536816	-6.19522	5.82025e-10	7.92564e-09
ACA1_015340	189.664	0.5202	0.206248	2.52221	0.0116622	0.0265263
ACA1_015350	453.805	-1.03582	0.143841	-7.20112	5.97203e-13	1.46741e-11
ACA1_015360	129.885	-0.163901	0.199393	-0.822001	0.411076	0.517497
ACA1_015370	1.66955	-0.427776	0.550484	-0.777091	0.437105	0.542784
ACA1_015470	255.387	-0.195881	0.251811	-0.777889	0.436635	0.542293
ACA1_015480	90.1086	0.101213	0.165283	0.612362	0.540298	0.638285
ACA1_015490	152.856	0.0510781	0.129995	0.392924	0.694376	0.772372
ACA1_015500	1168.98	-0.782655	0.0960931	-8.14476	3.80046e-16	1.65889e-14
ACA1_015510	280.33	-0.169108	0.12608	-1.34128	0.17983	0.267441
ACA1_015520	49.9791	-0.662643	0.30103	-2.20125	0.027718	0.0557137
ACA1_015530	214.307	1.0567	0.217484	4.85874	1.18138e-06	7.83681e-06
ACA1_015540	6.62057	0.290687	0.489213	0.594194	0.552382	0.648953
ACA1_015550	225.974	-0.726011	0.147205	-4.93197	8.14047e-07	5.63283e-06
ACA1_015560	447.771	0.47836	0.10192	4.69348	2.68592e-06	1.65414e-05
ACA1_015570	114.06	0.665142	0.184986	3.59563	0.000323608	0.00117949
ACA1_015580	20.1436	0.810129	0.332523	2.43631	0.0148379	0.0326347
ACA1_015590	80.1071	0.618919	0.191115	3.23846	0.00120177	0.00369743
ACA1_015690	15.034	-0.579123	0.371497	-1.55889	0.119023	0.18968
ACA1_015800	87.3874	0.414529	0.188694	2.19684	0.0280322	0.0562278
ACA1_016010	32.4963	-0.274156	0.278314	-0.98506	0.324595	0.429231
ACA1_016020	2.52585	0	0.539609	0	1	1
ACA1_016030	14.4643	-0.610632	0.374791	-1.62926	0.103258	0.168573
ACA1_016130	38.7763	-0.426756	0.301434	-1.41575	0.156847	0.238415
ACA1_016140	80.2444	0.423102	0.206665	2.04729	0.0406298	0.0772495
ACA1_016250	722.154	-0.225597	0.097227	-2.32031	0.0203242	0.0425387
ACA1_016360	52.4383	-1.08813	0.284776	-3.82099	0.000132919	0.000540505
ACA1_016470	280.18	-0.517959	0.136425	-3.79667	0.000146652	0.000589052
ACA1_016480	389.424	-0.568807	0.225373	-2.52385	0.0116077	0.0264187
ACA1_016580	2.7987	0.0106624	0.574473	0.0185603	0.985192	0.993803
ACA1_016690	246.025	-0.210693	0.177989	-1.18374	0.236516	0.333599
ACA1_016900	91.0776	3.583	0.362131	9.89423	4.40996e-23	5.74009e-21
ACA1_017200	82.3756	-0.426364	0.27368	-1.55789	0.119258	0.189993
ACA1_017310	28.1009	3.07458	0.443918	6.92602	4.32847e-12	9.03725e-11
ACA1_017320	350.331	-0.383122	0.148792	-2.57488	0.0100275	0.0232638
ACA1_017330	48.5004	0.70874	0.350152	2.0241	0.0429603	0.0810301
ACA1_017430	72.109	-0.0951687	0.183807	-0.517764	0.604623	0.697174
ACA1_017540	130.733	-0.200191	0.185605	-1.07859	0.280771	0.382191
ACA1_017740	3205.38	0.351881	0.100054	3.51693	0.000436573	0.00153957
ACA1_017750	0.312081	-0.149911	0.176471	-0.849495	0.395606	NA
ACA1_017760	0.0108952	0	0.164818	0	1	NA
ACA1_017770	106.847	-0.461998	0.271306	-1.70287	0.088593	0.147993
ACA1_017780	0.306729	0	0.371558	0	1	NA
ACA1_017880	166.634	-0.885771	0.170423	-5.19749	2.02001e-07	1.59047e-06
ACA1_017890	178.199	0.363319	0.144261	2.51849	0.0117859	0.026753
ACA1_018000	178.531	1.85066	0.324438	5.7042	1.16893e-08	1.22471e-07
ACA1_018110	97.6897	0.46912	0.338507	1.38585	0.165793	0.249778
ACA1_018120	1524.41	-0.59671	0.282982	-2.10865	0.0349749	0.0680103
ACA1_018130	1.17378	0.569938	0.549625	1.03696	0.299756	0.403059
ACA1_018140	785.261	1.30588	0.201872	6.46884	9.876e-11	1.58191e-09
ACA1_018340	183.481	-0.609334	0.277995	-2.19188	0.0283879	0.0568544
ACA1_018650	208.918	-0.419094	0.194329	-2.15662	0.031035	0.0613986
ACA1_018760	1901.79	0.263201	0.110439	2.38323	0.0171616	0.036799
ACA1_018770	2472.67	0.60995	0.0986261	6.18447	6.23115e-10	8.42166e-09
ACA1_018780	2009.97	-0.0372043	0.13332	-0.279061	0.780198	0.840965
ACA1_018790	147.983	-0.443296	0.158734	-2.7927	0.00522694	0.0132606
ACA1_018800	654.062	0.317494	0.0998785	3.1788	0.00147887	0.00442283
ACA1_018810	255.916	-0.129133	0.174871	-0.738444	0.460245	0.564434
ACA1_018920	110.241	-0.261268	0.176065	-1.48392	0.13783	0.21454
ACA1_018930	101.041	-0.0614796	0.168841	-0.364128	0.715763	0.788491
ACA1_018940	118.075	-0.569088	0.378456	-1.50371	0.132656	0.207718
ACA1_018950	86.2388	0.00466805	0.210455	0.0221808	0.982304	0.991767
ACA1_018960	1219.81	1.20207	0.20871	5.75953	8.43496e-09	9.11506e-08
ACA1_018970	216.386	-0.767795	0.325154	-2.36133	0.0182095	0.0387126
ACA1_018980	241.176	0.429273	0.214649	1.99989	0.0455125	0.0850226
ACA1_018990	727.003	0.0564573	0.09667	0.584021	0.559206	0.655317
ACA1_019000	231.175	0.682384	0.173513	3.93277	8.39739e-05	0.000357892
ACA1_019010	375.4	-0.962519	0.231113	-4.16471	3.11747e-05	0.000147242
ACA1_019020	31.5946	-0.885419	0.317611	-2.78775	0.0053076	0.0134335
ACA1_019030	173.722	0.379862	0.132934	2.85752	0.00426967	0.011131
ACA1_019130	3.82883	-0.349651	0.53559	-0.652833	0.513864	0.614748
ACA1_019140	273.42	0.26256	0.12061	2.17694	0.0294851	0.0587425
ACA1_019150	117.913	1.57361	0.410903	3.82963	0.000128336	0.000524525
ACA1_019160	3.07118	0.997665	0.565552	1.76406	0.0777225	0.1325
ACA1_019170	0.0118441	0	0.164818	0	1	NA
ACA1_019180	13.9005	-0.150545	0.443203	-0.339674	0.734102	0.803723
ACA1_019190	140.353	-0.240177	0.13716	-1.75107	0.0799339	0.135661
ACA1_019200	38.0989	0.670519	0.405123	1.6551	0.0979038	0.161033
ACA1_019210	9.2059	0.918611	0.490119	1.87426	0.0608946	0.108078
ACA1_019220	247.26	-0.635693	0.141342	-4.49757	6.87361e-06	3.84029e-05
ACA1_019330	21.6839	0.369692	0.345407	1.07031	0.28448	0.386222
ACA1_019340	1993.78	0.27437	0.117795	2.32922	0.0198472	0.0417033
ACA1_019350	1077.56	0.398892	0.091209	4.37338	1.22339e-05	6.42512e-05
ACA1_019360	490.146	-0.391187	0.170882	-2.28922	0.0220668	0.0457682
ACA1_019370	39.4181	-0.554878	0.305687	-1.81518	0.0694959	0.120682
ACA1_019380	314.563	-0.909687	0.459824	-1.97834	0.0478908	0.0886744
ACA1_019580	4.9915	-0.11276	0.55783	-0.20214	0.839807	0.887343
ACA1_019590	7.0236	-0.844766	0.5322	-1.58731	0.112443	0.181185
ACA1_019600	295.663	0.0599268	0.149875	0.399845	0.689271	0.768765
ACA1_019610	680.882	0.317779	0.170394	1.86497	0.0621861	0.10985
ACA1_019620	208.067	-0.80662	0.180145	-4.47762	7.54783e-06	4.17181e-05
ACA1_019630	101.863	-0.0526775	0.202084	-0.260672	0.794346	0.851514
ACA1_019640	316.092	0.375449	0.157683	2.38104	0.0172638	0.036985
ACA1_019650	51.4907	0.25908	0.219443	1.18062	0.237752	0.33493
ACA1_019760	105.473	0.143779	0.344301	0.417596	0.676243	0.758639
ACA1_019960	647.063	0.301696	0.0893654	3.37599	0.000735514	0.00240859
ACA1_019970	124.896	-0.447242	0.222649	-2.00873	0.0445654	0.0835775
ACA1_019980	0.511184	0.173089	0.42309	0.409107	0.682461	0.763646
ACA1_019990	16.7944	-0.634008	0.48816	-1.29877	0.194023	0.284016
ACA1_020090	66.904	0.59616	0.208059	2.86534	0.00416562	0.0109031
ACA1_020100	147.616	-0.409351	0.241679	-1.69378	0.0903075	0.150318
ACA1_020110	0	NA	NA	NA	NA	NA
ACA1_020120	258.894	-0.361528	0.173004	-2.08971	0.0366439	0.0707227
ACA1_020130	162.066	-0.543355	0.247479	-2.19556	0.0281233	0.056387
ACA1_020140	124.191	-0.0864663	0.187709	-0.460639	0.645057	0.731538
ACA1_020150	451.856	0.353211	0.119077	2.96624	0.0030147	0.0082306
ACA1_020160	3608.84	0.357049	0.124964	2.85721	0.00427382	0.0111398
ACA1_020460	0	NA	NA	NA	NA	NA
ACA1_020470	0	NA	NA	NA	NA	NA
ACA1_020480	0.146884	0	0.169386	0	1	NA
ACA1_020490	0	NA	NA	NA	NA	NA
ACA1_020500	0	NA	NA	NA	NA	NA
ACA1_020510	0	NA	NA	NA	NA	NA
ACA1_020520	0.0380791	0	0.164818	0	1	NA
ACA1_020530	0	NA	NA	NA	NA	NA
ACA1_020630	0.110496	0	0.165339	0	1	NA
ACA1_020640	0	NA	NA	NA	NA	NA
ACA1_020650	0.0283677	0.0846066	0.164818	0.513334	0.607718	NA
ACA1_020660	0	NA	NA	NA	NA	NA
ACA1_020670	0	NA	NA	NA	NA	NA
ACA1_020770	577.576	-0.365063	0.250019	-1.46014	0.144252	0.222511
ACA1_020780	1128.58	-0.0683871	0.102499	-0.667199	0.504645	0.606078
ACA1_020790	12.7258	0.169789	0.410143	0.413974	0.678893	0.760611
ACA1_020800	162.262	-0.106035	0.154152	-0.68786	0.491541	0.593894
ACA1_020810	0	NA	NA	NA	NA	NA
ACA1_020820	720.799	0.310177	0.111117	2.79144	0.00524739	0.0133007
ACA1_020830	900.6	0.251469	0.158174	1.58982	0.111876	0.18042
ACA1_020840	5.80451	0.550027	0.562802	0.977301	0.32842	0.433019
ACA1_020850	380.193	-0.196095	0.208937	-0.938536	0.347969	0.453701
ACA1_020860	1262.6	-0.376724	0.0881272	-4.27478	1.91329e-05	9.595e-05
ACA1_020870	147.177	-0.434834	0.275152	-1.58034	0.114028	0.183032
ACA1_020880	433.757	-1.54703	0.191958	-8.05918	7.68097e-16	3.18256e-14
ACA1_020890	12.1934	-0.0977813	0.400176	-0.244346	0.806963	0.861362
ACA1_020900	156.231	0.00323786	0.184449	0.0175542	0.985994	0.994322
ACA1_020910	891.205	0.220079	0.148912	1.47791	0.139431	0.216543
ACA1_020920	309.969	4.38206	0.39173	11.1864	4.75129e-29	1.40095e-26
ACA1_020930	219.07	-0.320511	0.141592	-2.26362	0.0235976	0.0484631
ACA1_020940	41.7384	3.05865	0.449065	6.81116	9.68127e-12	1.9161e-10
ACA1_020950	423.794	0.344193	0.141974	2.42434	0.015336	0.0335313
ACA1_021050	4.10084	-0.149485	0.534599	-0.279621	0.779768	0.840624
ACA1_021160	7.13603	0.875144	0.462932	1.89044	0.0586996	0.105027
ACA1_021170	30.5654	-0.0246091	0.26987	-0.0911887	0.927343	0.952866
ACA1_021280	6.94751	0.513139	0.464757	1.1041	0.269549	0.370546
ACA1_021580	873.453	0.604667	0.122875	4.92098	8.61125e-07	5.91327e-06
ACA1_021590	8.76539	0.0919691	0.422093	0.217888	0.827516	0.877501
ACA1_021690	486.533	0.0635061	0.126041	0.503854	0.614364	0.70563
ACA1_021700	1915.6	0.599893	0.102751	5.83832	5.27287e-09	5.9286e-08
ACA1_021810	526.461	0.609796	0.150928	4.04032	5.33782e-05	0.00023869
ACA1_021910	0	NA	NA	NA	NA	NA
ACA1_021920	0	NA	NA	NA	NA	NA
ACA1_021930	0.308456	-0.427291	0.382032	-1.11847	0.263367	NA
ACA1_021940	840.505	0.154348	0.145276	1.06245	0.28803	0.390052
ACA1_022040	128.182	0.761102	0.177033	4.2992	1.71416e-05	8.68382e-05
ACA1_022050	1.54769	0.921464	0.559297	1.64754	0.0994475	0.163201
ACA1_022060	2.29301	0.140701	0.574195	0.24504	0.806425	0.861077
ACA1_022070	0.584153	0.455437	0.450041	1.01199	0.311543	0.415621
ACA1_022080	633.727	0.338909	0.114064	2.97121	0.00296631	0.00811844
ACA1_022180	14.5315	-0.398937	0.562267	-0.709515	0.478005	0.581282
ACA1_022190	0.0375657	0	0.164818	0	1	NA
ACA1_022200	692.767	-0.355184	0.176906	-2.00775	0.0446696	0.0837404
ACA1_022210	0.878986	-0.698815	0.515728	-1.35501	0.175416	0.261954
ACA1_022220	1100.91	0.0718842	0.119743	0.600321	0.548292	0.645249
ACA1_022330	2080.81	-0.056629	0.111203	-0.50924	0.610584	0.702534
ACA1_022340	0.262292	0	0.173824	0	1	NA
ACA1_022350	21.3068	-0.369413	0.562856	-0.656319	0.511619	0.612417
ACA1_022360	922.773	0.323428	0.116386	2.77893	0.00545378	0.0137443
ACA1_022560	7.77089	0.141228	0.538821	0.262106	0.793239	0.850581
ACA1_022670	10.7352	-1.551	0.50891	-3.0477	0.00230602	0.00653411
ACA1_022680	0.281088	0.001089	0.282738	0.00385162	0.996927	NA
ACA1_022690	0.5535	0	0.430626	0	1	1
ACA1_022700	722.77	0.62105	0.174107	3.56705	0.000361021	0.00130043
ACA1_022710	14170.7	0.601258	0.131529	4.5713	4.84715e-06	2.82158e-05
ACA1_022720	58.1191	-0.0937121	0.223087	-0.42007	0.674434	0.757421
ACA1_022730	57.1344	-0.00627603	0.212631	-0.0295161	0.976453	0.988148
ACA1_022840	76.4335	0.261361	0.192402	1.35841	0.174334	0.260635
ACA1_022850	231.734	0.031123	0.148191	0.21002	0.833652	0.8824
ACA1_023050	91.0838	-0.773525	0.224705	-3.44241	0.000576558	0.00195911
ACA1_023060	55.6393	-0.589907	0.347182	-1.69913	0.0892945	0.148941
ACA1_023070	4.01356	-0.307198	0.569492	-0.539426	0.589593	0.683219
ACA1_023080	0	NA	NA	NA	NA	NA
ACA1_023090	173.561	0.418843	0.165253	2.53456	0.0112588	0.0257467
ACA1_023100	15.2416	3.02218	0.48233	6.26579	3.70929e-10	5.27478e-09
ACA1_023110	688.297	0.101885	0.20805	0.489713	0.624337	0.714602
ACA1_023120	7.71862	0.204039	0.523136	0.390029	0.696515	0.773769
ACA1_023130	15.3343	0.118252	0.467867	0.252747	0.800464	0.856536
ACA1_023140	0.582101	-0.128917	0.478483	-0.269429	0.787599	0.846354
ACA1_023150	0.192386	0.0967936	0.230836	0.419317	0.674984	NA
ACA1_023160	0.0670679	0.0580833	0.165937	0.350032	0.726315	NA
ACA1_023170	0	NA	NA	NA	NA	NA
ACA1_023180	2.40137	-0.291035	0.576151	-0.505137	0.613463	0.704892
ACA1_023380	0.00935949	0	0.164818	0	1	NA
ACA1_023390	248.645	-0.141869	0.131045	-1.0826	0.278987	0.380264
ACA1_023700	29.0387	0.174558	0.28977	0.602404	0.546905	0.644089
ACA1_023810	33197.6	-0.0271168	0.11807	-0.229668	0.81835	0.869824
ACA1_023820	2995.04	-0.516058	0.138523	-3.72542	0.00019499	0.000752059
ACA1_023830	44.5347	-0.355099	0.322925	-1.09963	0.271492	0.372573
ACA1_023840	2.32214	-0.0714987	0.575315	-0.124278	0.901096	0.933732
ACA1_023850	398.134	0.608612	0.112196	5.42452	5.81104e-08	5.18259e-07
ACA1_023860	180.035	0.76283	0.153021	4.98512	6.19247e-07	4.41821e-06
ACA1_023870	632.271	-0.543044	0.12461	-4.35795	1.31284e-05	6.84516e-05
ACA1_023880	521.011	-0.591631	0.131711	-4.49189	7.05931e-06	3.93036e-05
ACA1_023890	692.706	-1.2053	0.183064	-6.58402	4.5789e-11	7.95196e-10
ACA1_023990	507.988	1.31131	0.298298	4.39597	1.10278e-05	5.85771e-05
ACA1_024000	41.3354	0.962389	0.265776	3.62106	0.000293404	0.00108058
ACA1_024010	180.205	0.178214	0.1397	1.27569	0.202065	0.29412
ACA1_024020	704.584	-0.398739	0.135825	-2.93569	0.0033281	0.00898102
ACA1_024030	7.97729	0.403774	0.5336	0.756696	0.449232	0.554617
ACA1_024040	953.922	0.344632	0.0803302	4.29019	1.7852e-05	9.02154e-05
ACA1_024050	472.675	0.0178948	0.118101	0.15152	0.879565	0.916946
ACA1_024150	425.153	-0.892715	0.24998	-3.57115	0.000355419	0.00128281
ACA1_024160	1253.01	0.914586	0.294264	3.10804	0.00188333	0.00545296
ACA1_024170	6.79477	0.0239377	0.517545	0.0462525	0.963109	0.978758
ACA1_024180	353.585	0.674156	0.255423	2.63937	0.00830606	0.0197736
ACA1_024190	6.40509	0.113446	0.546635	0.207536	0.835591	0.883729
ACA1_024200	311.48	1.13846	0.212224	5.36444	8.12019e-08	7.04205e-07
ACA1_024210	522.402	1.59645	0.269768	5.91789	3.26106e-09	3.81196e-08
ACA1_024220	1080.5	-0.00429894	0.121097	-0.0354999	0.971681	0.984924
ACA1_024230	457.778	0.657026	0.170661	3.84989	0.000118169	0.000486624
ACA1_024240	771.667	1.06122	0.121402	8.74138	2.3029e-18	1.42189e-16
ACA1_024250	122.227	-0.310585	0.24309	-1.27765	0.201371	0.293287
ACA1_024260	92.184	0.396788	0.187422	2.11708	0.0342529	0.0667682
ACA1_024360	187.078	0.633154	0.150755	4.19989	2.67044e-05	0.000128651
ACA1_024370	0.310322	-0.241091	0.304819	-0.790931	0.428984	NA
ACA1_024380	3146.44	-0.836362	0.131245	-6.37254	1.8592e-10	2.78937e-09
ACA1_024390	356.287	0.139858	0.125008	1.1188	0.263227	0.363655
ACA1_024400	147.095	0.640166	0.389244	1.64464	0.100044	0.164113
ACA1_024410	2423.25	-0.285092	0.11472	-2.48512	0.0129508	0.0290233
ACA1_024420	149.096	0.012514	0.178187	0.0702297	0.944011	0.965005
ACA1_024430	76.5054	1.30828	0.384701	3.40076	0.000671986	0.00222987
ACA1_024630	391.952	0.102689	0.107162	0.958254	0.337935	0.443378
ACA1_024640	155.09	-0.0808004	0.19227	-0.420245	0.674306	0.757395
ACA1_024750	18.9264	-0.451042	0.379421	-1.18876	0.234533	0.331396
ACA1_024960	610.084	0.0286667	0.117028	0.244956	0.806491	0.861083
ACA1_024970	3.82729	0.00332193	0.574327	0.00578403	0.995385	1
ACA1_024980	362.895	-0.0100526	0.18872	-0.0532674	0.957519	0.974379
ACA1_024990	3.0523	0.764711	0.569331	1.34317	0.179216	0.266689
ACA1_025000	570.692	-0.226708	0.150008	-1.5113	0.130712	0.205245
ACA1_025200	72.4107	0.864273	0.266797	3.23944	0.00119765	0.00368711
ACA1_025410	145.334	-1.0744	0.211991	-5.06815	4.01702e-07	2.97936e-06
ACA1_025420	663.978	-0.372698	0.2273	-1.63968	0.101072	0.16551
ACA1_025520	1691.01	-0.394288	0.196672	-2.00479	0.0449851	0.0842443
ACA1_025530	42.8076	1.32147	0.519367	2.54439	0.010947	0.025133
ACA1_025540	864.336	1.37472	0.307528	4.47024	7.81328e-06	4.29879e-05
ACA1_025550	41.1375	-0.224363	0.270945	-0.828075	0.407628	0.51418
ACA1_025560	125.583	-0.991447	0.523002	-1.89568	0.0580018	0.103959
ACA1_025570	2031.12	-0.293386	0.168255	-1.74369	0.0812125	0.137361
ACA1_025670	799.816	-0.554599	0.179399	-3.09143	0.00199196	0.00572962
ACA1_025680	557.643	0.3768	0.133136	2.8302	0.00465196	0.01196
ACA1_025690	7407.17	-0.676627	0.198728	-3.40479	0.000662145	0.00220329
ACA1_025700	59.9486	-0.000849203	0.287686	-0.00295184	0.997645	1
ACA1_025710	113.818	-0.687118	0.160415	-4.28337	1.84086e-05	9.25746e-05
ACA1_025720	163.514	-0.421338	0.148689	-2.83369	0.00460137	0.011844
ACA1_025730	2311.66	0.419434	0.137558	3.04914	0.00229499	0.00650669
ACA1_025830	6.46606	1.77205	0.564694	3.13807	0.00170066	0.00497894
ACA1_025840	9.79567	1.66077	0.517456	3.20948	0.00132975	0.00402519
ACA1_025850	0.156239	0	0.224339	0	1	NA
ACA1_025860	0	NA	NA	NA	NA	NA
ACA1_025870	0.126118	0	0.167065	0	1	NA
ACA1_025880	42.3014	0.127102	0.258606	0.491489	0.623081	0.713673
ACA1_025980	344.201	-0.0232855	0.161331	-0.144334	0.885237	0.921197
ACA1_026390	116.482	-0.495548	0.169936	-2.91608	0.00354456	0.00948542
ACA1_026500	295.159	0.746897	0.193482	3.8603	0.00011325	0.000468031
ACA1_026700	620.8	0.262462	0.112248	2.33825	0.0193744	0.0408585
ACA1_026710	1213.45	-0.0745486	0.0912166	-0.817269	0.413775	0.520116
ACA1_026720	1426.3	-0.673536	0.154751	-4.35239	1.34662e-05	6.98885e-05
ACA1_026820	3062.96	0.467079	0.131496	3.55204	0.000382254	0.00136906
ACA1_026830	0.100029	0	0.166538	0	1	NA
ACA1_026840	486.941	-0.133148	0.181	-0.735624	0.46196	0.565962
ACA1_026850	32.7152	-0.608048	0.32894	-1.84851	0.064529	0.113338
ACA1_026860	375.389	0.25718	0.324492	0.792563	0.428032	0.533996
ACA1_026960	1487.55	0.204549	0.156989	1.30295	0.192592	0.282322
ACA1_026970	24.6755	0.156521	0.338406	0.462523	0.643706	0.730521
ACA1_026980	209.7	-1.49763	0.396806	-3.77422	0.000160508	0.00063885
ACA1_026990	1893.83	0.499965	0.474742	1.05313	0.292281	0.394772
ACA1_027000	660.156	-0.322845	0.121662	-2.65361	0.00796349	0.0190744
ACA1_027010	262.609	0.456841	0.137224	3.32917	0.000871046	0.00279044
ACA1_027020	466.21	0.822473	0.486808	1.68952	0.0911193	0.151373
ACA1_027030	341.823	-0.180117	0.159118	-1.13198	0.257644	0.357549
ACA1_027040	257.239	-0.0917742	0.127091	-0.722117	0.470223	0.573593
ACA1_027050	380.831	0.197154	0.148341	1.32906	0.183829	0.272099
ACA1_027150	65.4871	-0.261873	0.218947	-1.19606	0.231675	0.328096
ACA1_027160	784.8	0.491001	0.123005	3.99173	6.55942e-05	0.000287445
ACA1_027270	231.343	0.444283	0.159906	2.7784	0.00546272	0.0137584
ACA1_027280	94.0393	-0.0709296	0.265063	-0.267595	0.789011	0.847367
ACA1_027390	114.435	-1.31582	0.300911	-4.37278	1.22674e-05	6.4404e-05
ACA1_027490	4157.17	0.252936	0.183552	1.37801	0.168201	0.252617
ACA1_027500	834.343	0.737217	0.148064	4.97906	6.38933e-07	4.53182e-06
ACA1_027610	36.8524	0.14417	0.304969	0.472738	0.6364	0.724849
ACA1_027620	143.199	-1.00682	0.537907	-1.87175	0.0612416	0.108554
ACA1_027630	381.957	-0.00170684	0.12268	-0.0139129	0.988899	0.996431
ACA1_027730	28.2543	-1.62033	0.325908	-4.97174	6.63549e-07	4.67885e-06
ACA1_027740	466.239	0.142943	0.177857	0.803699	0.421571	0.527675
ACA1_027750	785.603	-0.317053	0.10126	-3.13107	0.00174168	0.00508873
ACA1_027760	1.2006	0.777336	0.547731	1.41919	0.155842	0.237261
ACA1_027770	110.034	0.852121	0.268719	3.17105	0.00151891	0.00452247
ACA1_027780	1595.24	0.158508	0.141008	1.12411	0.260967	0.361362
ACA1_027790	247.289	-1.72269	0.255325	-6.74704	1.5089e-11	2.83883e-10
ACA1_027800	220.595	-0.260643	0.146707	-1.77662	0.075631	0.129576
ACA1_027810	211.895	-0.171644	0.138625	-1.23819	0.215647	0.30977
ACA1_027820	0.614591	0.0554471	0.508609	0.109017	0.913189	0.94268
ACA1_027830	649.896	-0.607249	0.206684	-2.93805	0.00330279	0.00891802
ACA1_027840	452.532	0.795352	0.121245	6.5599	5.38451e-11	9.18481e-10
ACA1_027940	512.699	0.211344	0.207659	1.01775	0.308799	0.412684
ACA1_028150	269.883	0.118786	0.148727	0.798685	0.424473	0.530839
ACA1_028160	1321.27	-0.887434	0.182953	-4.8506	1.23087e-06	8.13522e-06
ACA1_028170	16.7288	-0.0329091	0.456826	-0.0720386	0.942571	0.964209
ACA1_028180	2.74697	0.161548	0.572566	0.282148	0.77783	0.838976
ACA1_028190	99.6778	-1.12316	0.454642	-2.47043	0.0134952	0.030043
ACA1_028300	380.217	-0.0548703	0.113912	-0.481691	0.630026	0.719627
ACA1_028310	75.3205	0.0312483	0.177502	0.176045	0.860259	0.902681
ACA1_028520	31.5133	-0.441191	0.286898	-1.53779	0.124099	0.196469
ACA1_028530	356.859	-0.307753	0.106297	-2.89522	0.00378889	0.0100389
ACA1_028540	1074.98	0.0316679	0.104498	0.303048	0.761853	0.826681
ACA1_028550	169.222	-0.560954	0.229	-2.44958	0.0143022	0.0316106
ACA1_028650	406.038	0.0756664	0.103178	0.733358	0.46334	0.566837
ACA1_028660	249.628	0.260111	0.258804	1.00505	0.314873	0.418996
ACA1_028670	5385.34	0.0950558	0.116725	0.814354	0.415442	0.521784
ACA1_028680	358.097	0.079381	0.179796	0.441506	0.658847	0.744022
ACA1_028690	138.609	0.396164	0.321286	1.23306	0.217555	0.311829
ACA1_028700	526.652	-0.677793	0.16021	-4.23065	2.33017e-05	0.000114084
ACA1_028710	0.177245	0	0.171246	0	1	NA
ACA1_028720	353.712	0.741932	0.154779	4.79348	1.6391e-06	1.05486e-05
ACA1_028730	206.165	-0.521303	0.245402	-2.12429	0.0336461	0.065745
ACA1_028740	165.528	0.23987	0.136818	1.7532	0.0795675	0.135119
ACA1_028850	12.3557	-0.363986	0.453822	-0.802046	0.422526	0.528633
ACA1_028960	28.4949	-0.479074	0.311956	-1.53571	0.124609	0.197127
ACA1_029360	1.14091	0.0375016	0.568695	0.0659433	0.947423	0.967034
ACA1_029370	41.2329	0.518745	0.259178	2.0015	0.0453383	0.0847746
ACA1_029380	163.699	0.010741	0.139423	0.0770391	0.938592	0.961212
ACA1_029390	283.084	0.305169	0.113041	2.69962	0.00694182	0.0169848
ACA1_029400	204.103	0.514752	0.139634	3.68643	0.00022742	0.000860148
ACA1_029410	196.728	0.953157	0.192112	4.96146	6.99652e-07	4.91662e-06
ACA1_029510	375.275	-0.0220354	0.131788	-0.167203	0.86721	0.907931
ACA1_029520	301.195	-0.685856	0.195246	-3.51278	0.000443445	0.00155961
ACA1_029530	218.074	-0.537421	0.148532	-3.61822	0.000296634	0.00109053
ACA1_029640	98.1842	1.20203	0.267722	4.48983	7.12784e-06	3.96089e-05
ACA1_029840	83.8289	0.244902	0.206602	1.18538	0.235867	0.332956
ACA1_030050	25.3269	-1.05246	0.336498	-3.1277	0.00176178	0.00513706
ACA1_030060	9.43524	0.350993	0.530841	0.661201	0.508484	0.609421
ACA1_030070	10.5291	-0.391003	0.446656	-0.875401	0.381356	0.48807
ACA1_030080	107.23	-1.31006	0.233935	-5.60009	2.14235e-08	2.1157e-07
ACA1_030090	966.967	0.261426	0.142778	1.831	0.0671005	0.117128
ACA1_030200	0.568276	-0.184915	0.401495	-0.460566	0.64511	0.73154
ACA1_030210	0.261561	0.118015	0.287196	0.410922	0.68113	NA
ACA1_030220	133.12	0.419849	0.178015	2.3585	0.0183491	0.0389348
ACA1_030720	195.614	-0.496204	0.229242	-2.16454	0.0304226	0.0603027
ACA1_030730	480.563	0.345226	0.12927	2.67059	0.00757188	0.018291
ACA1_030740	621.863	0.542494	0.0981391	5.52781	3.24258e-08	3.05728e-07
ACA1_030750	127.907	0.318763	0.22596	1.4107	0.158332	0.240317
ACA1_030760	1018.86	-0.589074	0.122233	-4.81929	1.4407e-06	9.36777e-06
ACA1_030770	22.0769	-0.337121	0.324894	-1.03764	0.29944	0.402747
ACA1_030780	419.267	0.193962	0.338902	0.572325	0.567102	0.662582
ACA1_030790	86.6185	0.613094	0.255326	2.40122	0.0163404	0.0353423
ACA1_030800	851.975	-0.842866	0.144769	-5.82213	5.81038e-09	6.4526e-08
ACA1_030810	1.6332	-0.99144	0.569149	-1.74197	0.081514	0.13776
ACA1_031010	78.003	0.631218	0.203271	3.1053	0.00190084	0.00549263
ACA1_031020	2.62631	-0.0421725	0.567599	-0.0742999	0.940772	0.96283
ACA1_031130	0	NA	NA	NA	NA	NA
ACA1_031140	118.568	3.34013	0.438043	7.62511	2.43826e-14	7.86338e-13
ACA1_031150	0	NA	NA	NA	NA	NA
ACA1_031160	57.6963	-0.621856	0.241352	-2.57655	0.00997904	0.0231759
ACA1_031270	433.895	2.21097	0.338225	6.537	6.27659e-11	1.0508e-09
ACA1_031380	1.63924	-0.640758	0.576347	-1.11176	0.266243	0.367119
ACA1_031390	144.063	0.268065	0.15341	1.74737	0.0805729	0.136585
ACA1_031400	74.2006	-0.733411	0.283799	-2.58427	0.00975867	0.0227398
ACA1_031410	81.3418	0.808328	0.322384	2.50734	0.0121642	0.0274951
ACA1_031510	88.3775	-0.531532	0.187346	-2.83717	0.00455156	0.0117511
ACA1_031520	110.159	0.297732	0.21807	1.36531	0.172157	0.25778
ACA1_031530	38.3625	-1.82413	0.470135	-3.88002	0.000104448	0.000435139
ACA1_031540	959.001	-3.9652	0.480139	-8.25844	1.47585e-16	6.83431e-15
ACA1_031550	351.228	0.0379322	0.228112	0.166287	0.867931	0.90862
ACA1_031560	42.6176	-0.829235	0.306354	-2.70679	0.00679381	0.0166622
ACA1_031570	479.054	-0.878617	0.292906	-2.99966	0.00270283	0.00748812
ACA1_031580	149.233	-0.528793	0.489977	-1.07922	0.28049	0.381917
ACA1_031590	254.639	-0.173472	0.522562	-0.331963	0.739917	0.80877
ACA1_031600	537.583	0.0621356	0.111607	0.556734	0.577709	0.672366
ACA1_031610	345.562	0.536363	0.14322	3.74503	0.000180372	0.000703947
ACA1_031620	549.324	-0.485216	0.0890402	-5.4494	5.05403e-08	4.56379e-07
ACA1_031630	74.0331	0.421194	0.248866	1.69245	0.0905599	0.150617
ACA1_031640	338.174	0.403786	0.131387	3.07326	0.00211735	0.00605201
ACA1_031650	99.0316	0.958772	0.270505	3.54438	0.000393537	0.0014046
ACA1_031660	3897.59	0.159131	0.135462	1.17473	0.240105	0.337651
ACA1_031670	213.282	0.0774636	0.194166	0.398955	0.689926	0.769241
ACA1_031680	45.3417	1.39024	0.272774	5.09667	3.45681e-07	2.5972e-06
ACA1_031780	181.806	-0.110996	0.351885	-0.315433	0.752433	0.819474
ACA1_031790	243.572	-0.397277	0.172832	-2.29862	0.0215263	0.0447563
ACA1_031800	238.439	0.787338	0.28473	2.76521	0.0056887	0.0142568
ACA1_031810	0.125245	0.079989	0.167109	0.478664	0.632177	NA
ACA1_031820	93.4016	-0.216785	0.190277	-1.13931	0.254574	0.354047
ACA1_031830	61.0325	-0.430839	0.239914	-1.79581	0.0725248	0.12522
ACA1_031840	0.923083	-0.186434	0.537346	-0.346954	0.728626	0.799088
ACA1_031850	1026.28	0.539662	0.125037	4.31601	1.58878e-05	8.08547e-05
ACA1_031860	133.788	-0.773098	0.143007	-5.40601	6.44426e-08	5.71557e-07
ACA1_031870	402.417	0.704791	0.231997	3.03794	0.00238205	0.00672184
ACA1_031880	6.2644	2.88206	0.541461	5.32275	1.02212e-07	8.63506e-07
ACA1_031890	5.30844	2.56722	0.567768	4.5216	6.13743e-06	3.47592e-05
ACA1_031900	2650.93	2.36496	0.309495	7.64137	2.14929e-14	6.97818e-13
ACA1_031910	69.4932	0.0928745	0.228679	0.406136	0.684643	0.765223
ACA1_031920	83.9714	-0.23814	0.229834	-1.03614	0.300137	0.403459
ACA1_031930	136.722	-0.372467	0.149659	-2.48878	0.0128183	0.028762
ACA1_031940	636.383	-0.203785	0.218745	-0.931614	0.351536	0.45765
ACA1_031950	496.327	-3.57647	0.458942	-7.79287	6.55019e-15	2.31954e-13
ACA1_031960	464.627	0.57239	0.145856	3.92435	8.69649e-05	0.000369876
ACA1_031970	6.41054	-0.589704	0.517972	-1.13849	0.254917	0.354411
ACA1_031980	246.044	0.428725	0.217298	1.97298	0.0484981	0.089661
ACA1_031990	114.218	-0.842249	0.289562	-2.9087	0.00362932	0.0096822
ACA1_032000	2916.69	0.0626344	0.0852627	0.734605	0.46258	0.566247
ACA1_032200	0.621282	0.116905	0.405297	0.288443	0.773007	0.835474
ACA1_032210	6.40565	-0.346373	0.511175	-0.677602	0.498024	0.600071
ACA1_032320	51.0244	0.769116	0.257989	2.98119	0.00287127	0.00789121
ACA1_032330	20.9096	-0.235538	0.361977	-0.650697	0.515242	0.615988
ACA1_032430	574.653	0.781446	0.154675	5.05217	4.3681e-07	3.21663e-06
ACA1_032840	411.428	1.04934	0.182334	5.75505	8.66186e-09	9.35325e-08
ACA1_033140	29.6215	-1.63738	0.33395	-4.90308	9.43452e-07	6.41157e-06
ACA1_033250	5.57126	-0.87472	0.568303	-1.53918	0.123761	0.196021
ACA1_033360	117.808	0.206544	0.16064	1.28576	0.198527	0.289663
ACA1_033370	4.28538	-0.549288	0.575715	-0.954096	0.340035	0.445432
ACA1_033380	109.905	-1.73238	0.289227	-5.98968	2.10254e-09	2.55702e-08
ACA1_033390	175.434	-0.315704	0.192185	-1.64271	0.100443	0.164664
ACA1_033400	281.192	-0.130084	0.176192	-0.738309	0.460327	0.564434
ACA1_033410	87.4746	-1.28129	0.205981	-6.2204	4.95889e-10	6.83646e-09
ACA1_033420	31.039	-1.06324	0.290108	-3.66497	0.000247366	0.000927095
ACA1_033430	315.974	0.154061	0.159279	0.967241	0.333423	0.438495
ACA1_033440	49.1179	-0.0366602	0.244469	-0.149958	0.880798	0.918032
ACA1_033450	336.143	0.309623	0.137023	2.25963	0.023844	0.0488442
ACA1_033460	24.8718	0.443371	0.312652	1.4181	0.156163	0.237674
ACA1_033470	19.698	-0.366402	0.404344	-0.906162	0.36485	0.471625
ACA1_033480	288.002	0.233188	0.133634	1.74498	0.0809888	0.137162
ACA1_033490	4.6858	1.09936	0.54927	2.0015	0.0453387	0.0847746
ACA1_033500	592.059	1.06047	0.148856	7.12408	1.0478e-12	2.42995e-11
ACA1_033510	161.092	1.1048	0.207303	5.32938	9.85486e-08	8.38534e-07
ACA1_033520	0.38404	0	0.359439	0	1	NA
ACA1_033530	0	NA	NA	NA	NA	NA
ACA1_033540	497.551	-0.226143	0.24813	-0.911389	0.362091	0.468771
ACA1_033550	784.939	-0.301996	0.100199	-3.01396	0.00257864	0.00718538
ACA1_033560	87.7274	-0.493502	0.306541	-1.60991	0.107418	0.174262
ACA1_033570	995.45	0.130352	0.114945	1.13405	0.256775	0.356514
ACA1_033580	6.80199	0.0459567	0.484175	0.0949176	0.92438	0.951039
ACA1_033590	1328.39	-0.24256	0.186524	-1.30042	0.193456	0.283331
ACA1_033600	180.117	-1.28382	0.267596	-4.79763	1.60553e-06	1.03511e-05
ACA1_033610	2243.39	0.280822	0.0765362	3.66914	0.000243364	0.000914227
ACA1_033620	1.02827	0.680034	0.512187	1.32771	0.184275	0.272592
ACA1_033630	293.725	0.443211	0.144176	3.07409	0.00211145	0.00603846
ACA1_033640	431.815	-0.349836	0.119996	-2.91538	0.00355252	0.00950497
ACA1_033650	0	NA	NA	NA	NA	NA
ACA1_033660	323.184	-0.826586	0.121284	-6.81529	9.4073e-12	1.86443e-10
ACA1_033670	711.804	0.911875	0.151276	6.02789	1.66113e-09	2.05304e-08
ACA1_033680	0.0647552	0	0.165384	0	1	NA
ACA1_033690	2.24619	1.8881	0.544291	3.46892	0.000522555	0.00179631
ACA1_033700	3.49866	1.43645	0.572516	2.50901	0.0121068	0.0273825
ACA1_033710	18705	-0.0622362	0.169618	-0.366919	0.71368	0.787238
ACA1_033720	1152.02	-0.351506	0.104569	-3.36147	0.000775298	0.00251324
ACA1_033730	482.101	-0.131357	0.149629	-0.877887	0.380005	0.486816
ACA1_033740	57.2051	0.0986274	0.328457	0.300275	0.763967	0.828539
ACA1_033750	1656.4	-0.734352	0.264034	-2.78128	0.00541445	0.0136571
ACA1_033760	562.142	0.352673	0.383983	0.918459	0.358379	0.464882
ACA1_033770	553.764	0.976203	0.135811	7.18793	6.5781e-13	1.60001e-11
ACA1_033780	102.181	0.381284	0.174927	2.17967	0.029282	0.0584089
ACA1_033790	0	NA	NA	NA	NA	NA
ACA1_033890	25.4729	0.960974	0.346431	2.77392	0.00553851	0.0139238
ACA1_033900	15.0397	-0.873815	0.441042	-1.98125	0.0475628	0.0881914
ACA1_033910	78.4265	0.766351	0.261195	2.93402	0.00334601	0.0090226
ACA1_034020	43.8505	-0.279692	0.262297	-1.06632	0.286281	0.388338
ACA1_034030	463.139	0.287768	0.135562	2.12277	0.0337728	0.0659374
ACA1_034040	102.228	0.600231	0.184733	3.24918	0.0011574	0.00358074
ACA1_034050	182.918	-0.982596	0.279697	-3.51307	0.000442958	0.00155828
ACA1_034060	36.2718	0.313779	0.290488	1.08018	0.280064	0.381482
ACA1_034070	186.931	0.237123	0.142376	1.66547	0.0958188	0.157909
ACA1_034080	867.742	1.05118	0.0991424	10.6027	2.89405e-26	5.36067e-24
ACA1_034090	1966.23	0.57094	0.0997653	5.72283	1.04763e-08	1.10888e-07
ACA1_034100	7.53434	-0.341962	0.57501	-0.594706	0.55204	0.648656
ACA1_034110	262.972	-0.142437	0.207051	-0.687932	0.491496	0.593889
ACA1_034120	285.179	-0.198092	0.151015	-1.31174	0.189609	0.278741
ACA1_034130	57.1636	-0.22925	0.363294	-0.631032	0.52802	0.627474
ACA1_034140	16.0133	-0.669518	0.386186	-1.73367	0.0829771	0.13971
ACA1_034150	247.023	0.192064	0.131351	1.46222	0.143681	0.221785
ACA1_034160	684.544	-0.0530364	0.180495	-0.293839	0.768881	0.832195
ACA1_034170	3927.21	0.186759	0.102053	1.83003	0.0672459	0.117359
ACA1_034180	13.6996	-1.3472	0.435754	-3.09165	0.00199047	0.00572648
ACA1_034280	1467.36	0.118074	0.0805445	1.46595	0.142663	0.220495
ACA1_034290	201.06	0.461763	0.223302	2.06789	0.0386504	0.0740022
ACA1_034300	312.525	0.194539	0.140475	1.38487	0.166093	0.250126
ACA1_034310	1193.55	0.707603	0.161984	4.36837	1.2518e-05	6.5529e-05
ACA1_034320	80.9312	-0.0173856	0.362289	-0.0479882	0.961726	0.977902
ACA1_034330	44.5723	-0.497515	0.256967	-1.9361	0.052855	0.0962866
ACA1_034340	0.740197	0.13438	0.478748	0.28069	0.778948	0.839994
ACA1_034350	776.232	0.0906487	0.0851206	1.06495	0.286901	0.388996
ACA1_034460	85.9896	-0.240189	0.20592	-1.16642	0.243446	0.341784
ACA1_034470	88.4064	0.37645	0.316881	1.18798	0.23484	0.331798
ACA1_034480	340.534	-0.755548	0.176874	-4.27166	1.94021e-05	9.69298e-05
ACA1_034490	114.035	-0.0749397	0.189664	-0.395118	0.692756	0.771045
ACA1_034500	52.7984	0.261843	0.26469	0.989241	0.322545	0.427182
ACA1_034510	4784.8	0.18504	0.0753101	2.45704	0.0140088	0.0310667
ACA1_034520	178.486	-0.343872	0.255567	-1.34552	0.178456	0.26578
ACA1_034530	139.071	-0.202425	0.180544	-1.12119	0.262206	0.36259
ACA1_034540	11396.7	-0.447471	0.133293	-3.35705	0.000787786	0.00254971
ACA1_034550	7728.34	-0.586468	0.124237	-4.72056	2.35199e-06	1.46157e-05
ACA1_034560	393.57	-0.194783	0.210578	-0.924988	0.354972	0.461333
ACA1_034570	407.804	-0.265634	0.141747	-1.87401	0.0609296	0.108106
ACA1_034580	224.319	-0.0126365	0.159892	-0.0790313	0.937008	0.959998
ACA1_034590	423.281	-0.878935	0.340338	-2.58254	0.00980768	0.0228296
ACA1_034600	173.708	0.967339	0.15174	6.37497	1.82993e-10	2.75405e-09
ACA1_034610	2607.94	-0.849749	0.118756	-7.15542	8.3415e-13	1.98547e-11
ACA1_034720	336.839	-0.155367	0.12522	-1.24076	0.214695	0.308587
ACA1_034930	5.13864	-0.257709	0.528791	-0.487356	0.626006	0.716278
ACA1_035040	50.3878	-0.351558	0.289739	-1.21336	0.224991	0.32039
ACA1_035240	56.3655	-0.311981	0.254233	-1.22715	0.219768	0.314408
ACA1_035250	40.0537	0.161004	0.285881	0.563187	0.573308	0.668104
ACA1_035260	1065.49	0.140185	0.0850294	1.64866	0.099217	0.162878
ACA1_035270	3.4005	-2.12594	0.562777	-3.77758	0.000158357	0.000631332
ACA1_035280	120.354	-0.500916	0.174271	-2.87434	0.00404868	0.0106336
ACA1_035290	35.6304	-0.144945	0.327146	-0.443058	0.657724	0.74316
ACA1_035300	190.183	-0.898217	0.29867	-3.00739	0.00263505	0.0073263
ACA1_035310	500.093	0.273492	0.154748	1.76734	0.0771721	0.131746
ACA1_035320	0.324322	0.41697	0.358765	1.16223	0.24514	NA
ACA1_035330	152.297	-0.025029	0.17975	-0.139243	0.889258	0.924694
ACA1_035340	3181.75	0.0449981	0.139861	0.321733	0.747655	0.815192
ACA1_035350	579.926	0.201222	0.0866283	2.32283	0.0201885	0.042316
ACA1_035360	9097.3	-1.07777	0.164287	-6.56028	5.37064e-11	9.17199e-10
ACA1_035370	283.464	0.58049	0.140084	4.14387	3.41498e-05	0.000159934
ACA1_035380	639.818	0.486533	0.127919	3.80345	0.000142692	0.00057555
ACA1_035390	186.006	-0.50769	0.182979	-2.77458	0.00552733	0.013903
ACA1_035400	211.649	0.154922	0.217322	0.712868	0.475928	0.579146
ACA1_035410	33.2959	0.138205	0.319249	0.432909	0.665081	0.749422
ACA1_035420	982.387	-0.0953021	0.291125	-0.327358	0.743397	0.811653
ACA1_035430	85.7112	0.258747	0.250257	1.03393	0.301171	0.404639
ACA1_035440	288.391	0.103699	0.129044	0.803598	0.421629	0.527694
ACA1_035450	613.183	0.0343037	0.192771	0.17795	0.858762	0.901635
ACA1_035460	354.558	0.237321	0.223922	1.05984	0.289217	0.391402
ACA1_035470	1410.07	-0.279925	0.0912294	-3.06836	0.00215235	0.00614326
ACA1_035480	153.231	-0.0958704	0.156365	-0.613118	0.539799	0.637904
ACA1_035490	1105.23	0.131174	0.148836	0.881334	0.378137	0.485155
ACA1_035500	0	NA	NA	NA	NA	NA
ACA1_035510	345.165	-0.220469	0.0911066	-2.4199	0.0155246	0.0338566
ACA1_035520	2843	-0.869013	0.161111	-5.39388	6.89514e-08	6.07815e-07
ACA1_035530	460.36	-0.671575	0.101219	-6.63486	3.24801e-11	5.79633e-10
ACA1_035540	0.301556	0.304421	0.416372	0.731128	0.464701	NA
ACA1_035550	77.1528	0.175097	0.25732	0.680464	0.496211	0.598385
ACA1_035560	1037.1	0.285322	0.0990648	2.88015	0.00397486	0.0104759
ACA1_035570	540.903	0.582681	0.129575	4.49686	6.89635e-06	3.85151e-05
ACA1_035580	110.802	-0.354042	0.209999	-1.68592	0.0918116	0.152322
ACA1_035590	676.21	1.15397	0.254035	4.54255	5.55777e-06	3.18899e-05
ACA1_035600	35.0599	0.778496	0.280713	2.77328	0.00554945	0.0139465
ACA1_035610	10.3624	-0.585494	0.437478	-1.33834	0.180786	0.268475
ACA1_035620	3.2304	-0.733624	0.576301	-1.27299	0.203023	0.295157
ACA1_035630	293.285	-0.269881	0.127063	-2.124	0.0336703	0.0657834
ACA1_035640	595.715	4.74254	0.341156	13.9014	6.21398e-44	2.24449e-40
ACA1_035650	611.721	0.0644637	0.0873231	0.73822	0.460381	0.564434
ACA1_035660	382.859	0.305546	0.118485	2.57877	0.00991519	0.0230498
ACA1_035770	0.199294	0	0.345087	0	1	NA
ACA1_035780	2.1338	0.257156	0.571431	0.45002	0.652696	0.738635
ACA1_035790	34.4406	0.0429002	0.394021	0.108878	0.913299	0.942727
ACA1_035890	24.9979	-0.549315	0.309293	-1.77604	0.075727	0.12971
ACA1_036000	198.13	-0.764375	0.202753	-3.76998	0.000163258	0.000648009
ACA1_036010	175.485	-0.056068	0.154834	-0.362117	0.717264	0.789623
ACA1_036020	194.084	0.550232	0.267971	2.05333	0.0400407	0.07628
ACA1_036030	759.337	0.750315	0.181285	4.13888	3.49012e-05	0.00016282
ACA1_036040	14418.8	-0.761733	0.138843	-5.4863	4.1043e-08	3.78907e-07
ACA1_036050	77.6025	-0.903839	0.220781	-4.09382	4.24322e-05	0.000194129
ACA1_036060	112.479	0.189638	0.188003	1.0087	0.31312	0.417269
ACA1_036170	174.237	-0.202135	0.129866	-1.55649	0.119592	0.19042
ACA1_036180	103.752	-0.634506	0.319801	-1.98407	0.0472484	0.0877502
ACA1_036190	275.066	0.82996	0.163842	5.06561	4.07085e-07	3.01464e-06
ACA1_036200	0	NA	NA	NA	NA	NA
ACA1_036210	74.7187	0.451977	0.191512	2.36005	0.0182725	0.038818
ACA1_036220	231.573	-0.435993	0.157826	-2.7625	0.00573605	0.0143605
ACA1_036230	98.0105	0.167239	0.18467	0.905609	0.365143	0.471835
ACA1_036240	904.19	-1.13462	0.258683	-4.38616	1.1537e-05	6.08789e-05
ACA1_036250	323.337	-2.48866	0.238074	-10.4533	1.41507e-25	2.40936e-23
ACA1_036260	2621.89	-1.6354	0.156934	-10.4209	1.99034e-25	3.34378e-23
ACA1_036270	472.786	0.417991	0.153815	2.71748	0.00657802	0.0161907
ACA1_036280	6155.5	-1.04574	0.200117	-5.22563	1.73564e-07	1.38851e-06
ACA1_036290	106.062	-0.296991	0.174693	-1.70007	0.089117	0.148679
ACA1_036300	51.76	-0.392991	0.237243	-1.65649	0.0976225	0.160589
ACA1_036310	114.781	0.91499	0.218324	4.19097	2.7776e-05	0.000133016
ACA1_036320	184.326	0.848445	0.236258	3.59118	0.000329185	0.001198
ACA1_036330	925.892	0.159958	0.0918067	1.74234	0.0814498	0.137668
ACA1_036340	1423.74	-0.0661822	0.100288	-0.65992	0.509305	0.610152
ACA1_036350	10.5373	0.0723537	0.476584	0.151817	0.879331	0.916946
ACA1_036360	776.768	-0.263731	0.108951	-2.42063	0.0154935	0.0337989
ACA1_036370	14.1567	-0.0749115	0.435742	-0.171917	0.863503	0.904902
ACA1_036380	1.13778	-0.211544	0.542271	-0.390107	0.696457	0.773769
ACA1_036390	58.9445	-0.250249	0.261853	-0.955687	0.339231	0.444755
ACA1_036400	9134.64	-1.16856	0.181335	-6.44422	1.162e-10	1.84693e-09
ACA1_036410	0.0211578	0	0.164818	0	1	NA
ACA1_036420	7673.28	-0.442611	0.176849	-2.50277	0.0123226	0.0278053
ACA1_036430	186.118	0.217452	0.169766	1.28089	0.200231	0.291892
ACA1_036440	60.694	-0.160625	0.253441	-0.633778	0.526226	0.62596
ACA1_036450	5.14624	0.379191	0.53825	0.70449	0.481128	0.584244
ACA1_036460	0.0420499	0	0.164818	0	1	NA
ACA1_036470	72.1861	-0.153019	0.188724	-0.810812	0.417474	0.523763
ACA1_036480	47.5602	-0.499965	0.269862	-1.85267	0.0639301	0.112463
ACA1_036490	488.158	0.307973	0.131225	2.3469	0.0189302	0.0400387
ACA1_036500	105.024	0.328026	0.183522	1.7874	0.0738733	0.127123
ACA1_036510	119.295	0.0218295	0.266911	0.0817857	0.934817	0.957965
ACA1_036520	841.691	0.370181	0.0900718	4.10984	3.95938e-05	0.000182705
ACA1_036530	512.341	-0.211527	0.490397	-0.431338	0.666222	0.75052
ACA1_036540	0	NA	NA	NA	NA	NA
ACA1_036550	0	NA	NA	NA	NA	NA
ACA1_036560	452.029	-0.578319	0.213061	-2.71434	0.00664086	0.0163231
ACA1_036570	0	NA	NA	NA	NA	NA
ACA1_036580	0	NA	NA	NA	NA	NA
ACA1_036590	0.16804	0.205634	0.233639	0.880136	0.378786	NA
ACA1_036600	357.486	0.180653	0.205695	0.878254	0.379806	0.486777
ACA1_036610	109.29	0.0222372	0.165179	0.134625	0.892908	0.927323
ACA1_036620	576.747	0.106665	0.166453	0.64081	0.521646	0.621382
ACA1_036630	68.0293	0.0747591	0.226577	0.32995	0.741437	0.810039
ACA1_036640	149.856	-0.153042	0.156954	-0.975073	0.329524	0.434157
ACA1_036650	132.615	-0.14843	0.182984	-0.811164	0.417271	0.523646
ACA1_036660	247.002	-0.158497	0.124391	-1.27418	0.202599	0.294719
ACA1_036670	257.022	0.754355	0.176268	4.27958	1.87246e-05	9.40657e-05
ACA1_036870	67.104	0.647648	0.27794	2.33017	0.0197971	0.0416102
ACA1_036880	213.606	-0.834166	0.131706	-6.33354	2.39593e-10	3.52508e-09
ACA1_036890	130.394	0.44288	0.154548	2.86565	0.00416149	0.0108942
ACA1_036900	6866.37	-0.455467	0.102592	-4.43961	9.0124e-06	4.88781e-05
ACA1_036910	202.468	0.388557	0.241751	1.60726	0.107996	0.175141
ACA1_036920	716.374	-1.00965	0.161992	-6.23272	4.58394e-10	6.36204e-09
ACA1_036930	275.292	1.63283	0.188978	8.64033	5.60493e-18	3.29187e-16
ACA1_036940	443.022	1.12687	0.234725	4.8008	1.58036e-06	1.0207e-05
ACA1_036950	848.082	1.21412	0.261477	4.64332	3.42854e-06	2.05733e-05
ACA1_036960	733.766	-0.163386	0.0912029	-1.79145	0.0732205	0.126149
ACA1_036970	96.6249	-0.392064	0.175163	-2.23828	0.0252027	0.0512929
ACA1_036980	97.8713	0.4757	0.224269	2.12112	0.0339121	0.0661664
ACA1_036990	2500.11	-0.0395767	0.093112	-0.425045	0.670804	0.754341
ACA1_037000	439.099	0.0880425	0.164236	0.536074	0.591908	0.685357
ACA1_037010	1804.77	-0.0712987	0.197503	-0.361	0.718099	0.790243
ACA1_037020	1885.45	-0.102915	0.188696	-0.545403	0.585476	0.679271
ACA1_037030	116.784	0.161509	0.161136	1.00231	0.316192	0.420502
ACA1_037040	2.38321	0.191097	0.563307	0.33924	0.734429	0.803927
ACA1_037050	31.8647	-0.0682772	0.328342	-0.207945	0.835272	0.883578
ACA1_037060	172.625	-0.572547	0.163058	-3.5113	0.000445915	0.00156754
ACA1_037070	503.933	-0.367709	0.161952	-2.27049	0.0231781	0.0477305
ACA1_037080	2210.49	0.212829	0.125381	1.69746	0.0896091	0.14939
ACA1_037090	464.286	0.119756	0.147279	0.813123	0.416148	0.522463
ACA1_037100	475.565	0.229675	0.16672	1.3776	0.168326	0.252777
ACA1_037110	1789.52	0.055913	0.256828	0.217706	0.827658	0.87758
ACA1_037120	412.93	0.482	0.130463	3.69452	0.000220305	0.000836522
ACA1_037130	245.123	0.301207	0.163458	1.84272	0.0653695	0.114605
ACA1_037140	113.94	0.66338	0.19148	3.46449	0.000531229	0.00182179
ACA1_037150	155.072	-0.564784	0.19649	-2.87437	0.00404835	0.0106336
ACA1_037160	554.716	0.233976	0.109474	2.13727	0.0325758	0.0639931
ACA1_037170	145.775	0.414699	0.167955	2.46911	0.0135449	0.030135
ACA1_037180	72.6533	0.409401	0.190792	2.1458	0.0318892	0.0628303
ACA1_037190	545.401	-0.283172	0.142103	-1.99273	0.0462914	0.0862323
ACA1_037200	624.455	-0.29161	0.114895	-2.53805	0.0111473	0.0255198
ACA1_037210	123.637	-0.558984	0.227283	-2.45942	0.0139163	0.0308757
ACA1_037220	28.0741	-0.491605	0.294727	-1.668	0.0953149	0.15724
ACA1_037430	151.807	-0.992112	0.192347	-5.15794	2.49683e-07	1.92704e-06
ACA1_037440	192.776	-1.05247	0.170358	-6.17798	6.49275e-10	8.74252e-09
ACA1_037450	157.453	-1.09013	0.197733	-5.51316	3.52449e-08	3.29591e-07
ACA1_037460	2248.21	-0.291336	0.114574	-2.54278	0.0109974	0.0252167
ACA1_037470	247.536	-0.0228746	0.123548	-0.185148	0.853113	0.897595
ACA1_037480	650.465	-0.295834	0.130645	-2.26441	0.0235489	0.0483813
ACA1_037490	306.293	0.48008	0.130566	3.67691	0.000236075	0.000889855
ACA1_037500	75.4059	1.6114	0.265281	6.07433	1.24506e-09	1.57381e-08
ACA1_037700	1066.32	0.347214	0.109704	3.165	0.00155086	0.00461044
ACA1_037710	17.0939	0.617983	0.377799	1.63574	0.101893	0.166721
ACA1_037720	118.351	0.187515	0.163649	1.14584	0.251863	0.35101
ACA1_037730	72.5164	-1.22987	0.470698	-2.61286	0.00897881	0.0211418
ACA1_037740	538.78	-0.166823	0.191896	-0.869338	0.384662	0.491388
ACA1_037750	60.6932	-0.243393	0.21924	-1.11017	0.266927	0.367817
ACA1_037760	265.376	-0.439057	0.120512	-3.64327	0.000269195	0.000998799
ACA1_037770	179.738	-0.553392	0.141312	-3.91611	8.99907e-05	0.00038151
ACA1_037780	755.65	0.0978217	0.0929978	1.05187	0.292859	0.395441
ACA1_037790	549.844	0.542065	0.162954	3.32649	0.000879487	0.00281685
ACA1_037800	920.703	0.2832	0.106572	2.65737	0.00787539	0.0189009
ACA1_037810	30.7157	2.84162	0.512813	5.54125	3.00325e-08	2.8622e-07
ACA1_037820	0.148317	0	0.233114	0	1	NA
ACA1_037830	93.9953	0.159437	0.300934	0.529806	0.596246	0.689551
ACA1_037840	28.6991	-1.25732	0.333704	-3.76778	0.000164705	0.000653393
ACA1_037850	8.48069	0.556164	0.45945	1.2105	0.226087	0.321602
ACA1_037860	485.55	1.06458	0.133284	7.98726	1.37973e-15	5.44654e-14
ACA1_037870	675.327	0.105109	0.11716	0.897137	0.369646	0.476248
ACA1_037880	19.2161	3.18882	0.501299	6.36111	2.00296e-10	2.99263e-09
ACA1_037890	80.4659	-0.566654	0.295023	-1.92071	0.0547681	0.0991963
ACA1_037900	264.31	1.23165	0.294075	4.18821	2.81159e-05	0.000134465
ACA1_037910	187.009	0.26167	0.145098	1.8034	0.0713251	0.12345
ACA1_037920	275.154	-0.939238	0.348348	-2.69626	0.0070122	0.0171136
ACA1_037930	899.54	0.61767	0.108419	5.69709	1.21869e-08	1.27223e-07
ACA1_037940	138.243	-0.305922	0.303331	-1.00854	0.313193	0.417322
ACA1_038050	98.7525	-0.0810809	0.21855	-0.370995	0.710641	0.784845
ACA1_038060	139.228	-0.229566	0.291684	-0.787038	0.43126	0.537278
ACA1_038070	88.6342	-0.625304	0.272014	-2.29879	0.0215167	0.0447427
ACA1_038080	633.587	-0.011987	0.122405	-0.0979289	0.921989	0.949198
ACA1_038090	281.554	-0.112004	0.110782	-1.01103	0.312001	0.41604
ACA1_038100	818.975	-0.164409	0.156761	-1.04879	0.294277	0.39706
ACA1_038110	126.447	0.0878534	0.169444	0.51848	0.604123	0.696709
ACA1_038120	73.437	-0.461182	0.202496	-2.27749	0.0227569	0.0469702
ACA1_038130	5529.21	-0.581831	0.108124	-5.38114	7.40156e-08	6.49288e-07
ACA1_038140	144.705	-0.583436	0.268809	-2.17044	0.0299732	0.0595439
ACA1_038150	216.033	-0.240081	0.140422	-1.70971	0.0873192	0.146119
ACA1_038160	762.247	0.633713	0.137536	4.60763	4.07283e-06	2.40082e-05
ACA1_038170	155.187	1.32165	0.282762	4.67407	2.95289e-06	1.79938e-05
ACA1_038180	800.624	0.0609344	0.109656	0.555684	0.578427	0.672929
ACA1_038190	164.383	0.143507	0.217991	0.658315	0.510336	0.611162
ACA1_038200	154.567	0.144901	0.196256	0.738327	0.460316	0.564434
ACA1_038210	253.075	0.897531	0.161971	5.5413	3.00231e-08	2.8622e-07
ACA1_038220	414.583	0.811813	0.190381	4.26414	2.00674e-05	9.97706e-05
ACA1_038230	1383.16	-0.148143	0.0941469	-1.57352	0.115597	0.185017
ACA1_038240	823.224	-1.01865	0.145603	-6.9961	2.63181e-12	5.70082e-11
ACA1_038250	54.3208	0.345792	0.225595	1.5328	0.125325	0.198021
ACA1_038260	171.689	-0.287645	0.17692	-1.62585	0.103981	0.169543
ACA1_038270	276.588	-0.646831	0.246701	-2.62192	0.00874356	0.0206924
ACA1_038280	2461.52	0.701863	0.127945	5.48567	4.119e-08	3.80021e-07
ACA1_038290	0	NA	NA	NA	NA	NA
ACA1_038300	238.715	-0.169063	0.144006	-1.174	0.240394	0.338026
ACA1_038310	73.0073	-0.458101	0.217558	-2.10565	0.0352345	0.0684416
ACA1_038320	108.631	-1.02765	0.225731	-4.55256	5.29976e-06	3.0555e-05
ACA1_038330	375.435	-0.967948	0.213912	-4.52498	6.04004e-06	3.42894e-05
ACA1_038340	193.803	-0.254778	0.357492	-0.71268	0.476044	0.57919
ACA1_038350	235.877	0.262023	0.135223	1.93771	0.0526591	0.0960023
ACA1_038360	719.874	-0.604956	0.115694	-5.22892	1.70504e-07	1.36706e-06
ACA1_038370	391.329	0.500012	0.118613	4.21551	2.49219e-05	0.000121073
ACA1_038380	194.186	0.817711	0.178804	4.57322	4.80287e-06	2.79919e-05
ACA1_038390	155.266	0.34084	0.158369	2.15219	0.0313824	0.0619585
ACA1_038400	436.92	0.131889	0.113128	1.16584	0.24368	0.342079
ACA1_038410	30.3009	-0.157497	0.312762	-0.503567	0.614566	0.705685
ACA1_038420	677.308	-0.659979	0.149689	-4.40899	1.03853e-05	5.55524e-05
ACA1_038430	2108.27	-1.18143	0.172237	-6.85931	6.91957e-12	1.4061e-10
ACA1_038440	22.7972	0.68256	0.307965	2.21636	0.0266669	0.0539311
ACA1_038450	138.71	-0.305439	0.161914	-1.88642	0.0592378	0.105754
ACA1_038460	36261.6	-1.14679	0.161397	-7.10541	1.19962e-12	2.75113e-11
ACA1_038470	193.654	-0.483748	0.13505	-3.58201	0.000340967	0.00123745
ACA1_038480	259.312	0.138335	0.132918	1.04075	0.297992	0.401212
ACA1_038490	1519.99	-0.546077	0.194557	-2.80677	0.00500415	0.0127423
ACA1_038500	377.34	1.64036	0.353529	4.63997	3.48463e-06	2.08472e-05
ACA1_038510	171.94	0.0196707	0.193185	0.101823	0.918897	0.946988
ACA1_038520	254.22	0.790122	0.137465	5.74781	9.04063e-09	9.71145e-08
ACA1_038530	143.734	0.728883	0.291984	2.49632	0.0125491	0.0282589
ACA1_038540	667.229	0.707215	0.127562	5.5441	2.95473e-08	2.83089e-07
ACA1_038550	995.475	-0.089239	0.184472	-0.483754	0.62856	0.718354
ACA1_038560	135.557	0.0821148	0.185433	0.442827	0.657891	0.743233
ACA1_038570	123.208	-0.635807	0.256784	-2.47603	0.0132851	0.0296392
ACA1_038580	3.18301	0.394548	0.5669	0.695974	0.486445	0.589215
ACA1_038980	67.7706	-0.11092	0.240483	-0.461237	0.644629	0.731251
ACA1_039190	158.103	0.300526	0.135659	2.21531	0.0267389	0.0540465
ACA1_039200	737.735	-0.287536	0.348326	-0.825478	0.4091	0.515721
ACA1_039210	16.2758	-1.5542	0.353143	-4.40106	1.07722e-05	5.73461e-05
ACA1_039320	166.717	1.14298	0.184479	6.19568	5.80355e-10	7.91034e-09
ACA1_039330	506.763	0.234806	0.158815	1.47849	0.139277	0.216328
ACA1_039340	287.675	1.56643	0.2614	5.99247	2.06673e-09	2.51771e-08
ACA1_039450	593.95	3.68343	0.305858	12.043	2.11235e-33	1.13034e-30
ACA1_039460	379.722	-0.885236	0.358788	-2.46729	0.0136139	0.0302651
ACA1_039470	6.40249	-1.56528	0.538323	-2.9077	0.00364101	0.0097022
ACA1_039480	0.366721	-0.339332	0.419501	-0.808895	0.418576	NA
ACA1_039490	294.039	-0.465372	0.112429	-4.13926	3.48429e-05	0.0001626
ACA1_039500	337.411	-0.646342	0.198808	-3.25108	0.00114966	0.0035591
ACA1_039510	243.95	-0.857546	0.262081	-3.27207	0.00106763	0.00333844
ACA1_039520	87.7326	-0.147362	0.217185	-0.678512	0.497447	0.599658
ACA1_039620	335.95	0.112567	0.141981	0.792833	0.427875	0.533846
ACA1_039630	491.913	0.624286	0.157999	3.9512	7.776e-05	0.000334344
ACA1_039640	482.241	-0.220046	0.174937	-1.25785	0.208444	0.301281
ACA1_039650	13.2059	0.705181	0.525031	1.34312	0.179232	0.266689
ACA1_039660	577.87	-0.172152	0.201351	-0.854987	0.392559	0.499268
ACA1_039770	0.0553287	0	0.16543	0	1	NA
ACA1_039970	0.866531	0	0.459161	0	1	1
ACA1_039980	125.032	-0.171923	0.149326	-1.15132	0.249599	0.348527
ACA1_040190	312.569	0.161595	0.178602	0.904777	0.365583	0.472154
ACA1_040200	111.862	0.905885	0.185039	4.89563	9.79914e-07	6.62508e-06
ACA1_040210	163.042	-0.868928	0.161728	-5.37276	7.75424e-08	6.7641e-07
ACA1_040320	164.647	-0.654741	0.156962	-4.17133	3.02825e-05	0.000143591
ACA1_040420	14.2101	-0.707216	0.38671	-1.8288	0.0674291	0.117616
ACA1_040430	1339.93	0.354232	0.140002	2.53019	0.0114001	0.0260203
ACA1_040440	905.597	0.289582	0.0979445	2.9566	0.00311055	0.00846468
ACA1_040450	108.828	0.382827	0.332808	1.15029	0.250023	0.348984
ACA1_040460	4010.14	0.336428	0.0847512	3.96959	7.19957e-05	0.000312277
ACA1_040470	1426.95	0.173524	0.0944557	1.8371	0.0661958	0.115899
ACA1_040480	494.122	0.555592	0.146837	3.78373	0.000154497	0.000617683
ACA1_040490	289.556	-0.162498	0.170406	-0.953592	0.34029	0.445498
ACA1_040500	305.785	0.424675	0.149908	2.83291	0.00461265	0.011868
ACA1_040510	144.465	1.13406	0.215475	5.26306	1.41675e-07	1.15907e-06
ACA1_040520	1731.8	0.884755	0.132474	6.67869	2.41094e-11	4.39814e-10
ACA1_040530	118.678	0.489214	0.315047	1.55283	0.120464	0.191491
ACA1_040640	116.592	0.299538	0.214751	1.39482	0.16307	0.246345
ACA1_040650	185.126	0.133257	0.218121	0.610931	0.541245	0.639022
ACA1_040660	207.595	-0.0338192	0.136197	-0.24831	0.803894	0.85913
ACA1_040670	231.723	-0.0650991	0.196599	-0.331126	0.740549	0.809339
ACA1_040680	13.5232	-0.735126	0.423983	-1.73386	0.0829432	0.139669
ACA1_040690	168.782	0.1308	0.174201	0.750854	0.45274	0.557599
ACA1_040700	158.435	0.491012	0.155368	3.16031	0.00157599	0.00467171
ACA1_040710	824.201	-0.196748	0.120861	-1.62788	0.10355	0.168973
ACA1_040720	2339.46	0.840672	0.0955365	8.79949	1.3744e-18	8.78642e-17
ACA1_040730	615.587	-0.139794	0.126917	-1.10146	0.270696	0.371767
ACA1_040740	71.368	0.219845	0.251077	0.875609	0.381243	0.487969
ACA1_040750	424.49	-0.127895	0.17813	-0.717985	0.472767	0.576072
ACA1_040760	351.084	0.787192	0.128665	6.11814	9.46763e-10	1.22901e-08
ACA1_040770	949.819	1.49564	0.227528	6.57342	4.91712e-11	8.51829e-10
ACA1_040780	0.271828	0.158225	0.336001	0.470907	0.637707	NA
ACA1_040790	186.165	0.426532	0.231851	1.83968	0.0658145	0.115311
ACA1_040800	507.623	-0.386287	0.119168	-3.24152	0.00118895	0.0036611
ACA1_040810	2321.87	-0.530955	0.140153	-3.78839	0.000151626	0.000607177
ACA1_040820	394.96	1.23138	0.13609	9.0483	1.45212e-19	1.11597e-17
ACA1_040830	747.005	0.754409	0.116012	6.50287	7.88028e-11	1.29822e-09
ACA1_040840	1580.9	1.66535	0.137898	12.0767	1.40307e-33	8.10864e-31
ACA1_040850	1004.06	0.253047	0.12024	2.10452	0.0353335	0.0686153
ACA1_040860	262.578	-1.15205	0.362163	-3.18102	0.00146756	0.00439542
ACA1_040870	207.902	0.719006	0.422701	1.70098	0.0889463	0.148463
ACA1_040880	365.583	-0.0364087	0.112163	-0.324607	0.745479	0.81325
ACA1_040890	43.2435	0.0915245	0.314147	0.291343	0.770789	0.833622
ACA1_041000	44.7417	1.4933	0.28953	5.15768	2.50023e-07	1.92823e-06
ACA1_041110	9.53036	0.16149	0.442995	0.36454	0.715454	0.788365
ACA1_041220	7.31598	-1.43839	0.486983	-2.95367	0.00314021	0.00852495
ACA1_041430	32.844	-0.634368	0.287612	-2.20564	0.0274092	0.0551928
ACA1_041640	2.01089	0.424056	0.572153	0.741159	0.458597	0.56294
ACA1_041740	16.5012	0.737911	0.363307	2.0311	0.0422452	0.0798899
ACA1_041750	243.368	1.27298	0.293522	4.33692	1.44494e-05	7.44262e-05
ACA1_041760	62.8699	-0.999466	0.349722	-2.85788	0.00426477	0.0111203
ACA1_041770	138.937	-0.373664	0.257629	-1.45039	0.146949	0.226008
ACA1_041780	87.5516	-0.227178	0.226739	-1.00194	0.316374	0.42059
ACA1_041790	1798.77	-0.817907	0.197407	-4.14325	3.42424e-05	0.000160264
ACA1_041900	454.5	1.17694	0.123766	9.50943	1.9171e-21	1.99268e-19
ACA1_041910	13.2737	-2.90478	0.508472	-5.71278	1.11147e-08	1.17045e-07
ACA1_041920	529.431	-1.42115	0.343991	-4.13135	3.60645e-05	0.000167759
ACA1_041930	181.292	-0.102406	0.169076	-0.605677	0.544729	0.642259
ACA1_041940	453.035	-0.288107	0.167368	-1.7214	0.0851789	0.142918
ACA1_041950	102.115	0.119147	0.182836	0.651658	0.514622	0.615499
ACA1_041960	324.544	-0.244592	0.112627	-2.1717	0.0298785	0.0593789
ACA1_041970	18.3814	0.598343	0.379485	1.57672	0.114859	0.184101
ACA1_041980	27.1081	-0.66152	0.331951	-1.99283	0.0462804	0.0862323
ACA1_041990	273.966	-0.555607	0.118697	-4.68089	2.8563e-06	1.74715e-05
ACA1_042000	248.369	0.498751	0.154806	3.22178	0.00127398	0.00388978
ACA1_042010	210.451	0.654044	0.176867	3.69794	0.000217353	0.000826533
ACA1_042020	120.018	0.0678515	0.204182	0.332309	0.739656	0.808546
ACA1_042030	168.089	0.234678	0.186946	1.25532	0.209361	0.302516
ACA1_042040	147.315	0.218051	0.143518	1.51933	0.12868	0.202524
ACA1_042050	72.3829	0.208752	0.237287	0.879745	0.378998	0.485979
ACA1_042060	767.948	-0.651354	0.258505	-2.5197	0.0117456	0.026674
ACA1_042070	322.742	0.299187	0.163537	1.82948	0.0673284	0.117483
ACA1_042080	0.0535341	0.086683	0.165522	0.523694	0.600491	NA
ACA1_042090	16.3613	0.389035	0.365223	1.0652	0.286786	0.388877
ACA1_042200	0.0599465	0	0.165571	0	1	NA
ACA1_042210	767.075	1.26619	0.270555	4.67996	2.86932e-06	1.75363e-05
ACA1_042220	0.601754	-0.192516	0.499068	-0.385752	0.699681	0.776241
ACA1_042230	0.428217	0.113395	0.305047	0.371729	0.710095	0.784362
ACA1_042240	173.953	0.605486	0.146703	4.1273	3.67045e-05	0.000170407
ACA1_042250	2937.36	-0.447556	0.128274	-3.48905	0.000484732	0.00168676
ACA1_042260	0.0392788	0.070794	0.165396	0.428026	0.668632	NA
ACA1_042270	453.078	1.14832	0.259902	4.41827	9.94946e-06	5.33989e-05
ACA1_042280	288.981	-0.0420515	0.128141	-0.328164	0.742787	0.811171
ACA1_042290	241.105	-0.0133668	0.14097	-0.0948208	0.924457	0.951051
ACA1_042300	0.0914625	0	0.166733	0	1	NA
ACA1_042310	568.322	-0.440502	0.141826	-3.10593	0.00189681	0.0054832
ACA1_042320	236.686	-0.235343	0.126404	-1.86184	0.0626263	0.110493
ACA1_042330	85.2766	0.0695954	0.234454	0.296841	0.766588	0.830283
ACA1_042340	6.51168	-0.277284	0.511586	-0.542008	0.587813	0.681544
ACA1_042450	49.6087	-0.117824	0.232807	-0.506102	0.612785	0.704449
ACA1_042560	0	NA	NA	NA	NA	NA
ACA1_042670	62.762	0.415996	0.218403	1.90472	0.0568165	0.102129
ACA1_042680	292.807	0.952786	0.162315	5.86999	4.35822e-09	4.97767e-08
ACA1_042690	129.328	0.253432	0.174426	1.45295	0.146237	0.225128
ACA1_042800	36.2305	-1.33972	0.303205	-4.41854	9.93696e-06	5.33516e-05
ACA1_042810	1.35277	-0.248753	0.553839	-0.449144	0.653328	0.739176
ACA1_042820	44.0424	0.220964	0.30651	0.720903	0.470969	0.574225
ACA1_042830	11.9061	0.463363	0.390445	1.18676	0.235323	0.332416
ACA1_042840	81.944	-0.244845	0.185991	-1.31643	0.188028	0.277038
ACA1_042850	631.207	0.597429	0.142794	4.18384	2.86623e-05	0.000136897
ACA1_042860	265.326	0.607804	0.29069	2.0909	0.0365369	0.0705729
ACA1_042870	901.873	0.0579301	0.0899316	0.644158	0.519473	0.619918
ACA1_042880	0	NA	NA	NA	NA	NA
ACA1_042990	9.01804	0.659477	0.42857	1.53878	0.123857	0.196108
ACA1_043100	346.004	0.0103786	0.0948647	0.109404	0.912882	0.942534
ACA1_043110	44.5967	-1.0321	0.28655	-3.60181	0.000316007	0.00115411
ACA1_043120	357.016	0.437239	0.116767	3.74453	0.000180729	0.000705151
ACA1_043130	40.397	0.489432	0.261803	1.86947	0.0615575	0.109033
ACA1_043140	238.857	-0.317048	0.178086	-1.7803	0.0750261	0.128784
ACA1_043150	492.321	-0.0312932	0.100626	-0.310985	0.755812	0.822225
ACA1_043160	100.775	0.316387	0.194641	1.62548	0.104059	0.169632
ACA1_043170	179.26	0.804135	0.227797	3.53005	0.000415481	0.00147382
ACA1_043180	414.304	0.625781	0.173322	3.61051	0.000305599	0.00111893
ACA1_043190	1093.6	-3.1944	0.331196	-9.64504	5.15897e-22	5.7336e-20
ACA1_043200	556.19	0.141331	0.153389	0.921387	0.356848	0.46323
ACA1_043210	0.0118441	0	0.164818	0	1	NA
ACA1_043220	277.445	-0.274589	0.170414	-1.61131	0.107112	0.173824
ACA1_043230	51.8696	0.508035	0.259231	1.95978	0.0500218	0.0918549
ACA1_043240	22.5755	1.06948	0.387875	2.75728	0.00582841	0.0145841
ACA1_043250	318.281	1.69527	0.297718	5.6942	1.23954e-08	1.29027e-07
ACA1_043260	699.88	-0.472104	0.207035	-2.28031	0.022589	0.0466838
ACA1_043270	104.014	0.567695	0.190365	2.98215	0.00286236	0.00786823
ACA1_043280	222.465	0.104362	0.188104	0.554813	0.579022	0.673189
ACA1_043290	351.95	0.236076	0.322452	0.73213	0.464089	0.56756
ACA1_043300	179.264	-0.318081	0.243961	-1.30382	0.192296	0.281946
ACA1_043310	52.7352	0.811256	0.282209	2.87467	0.00404452	0.0106285
ACA1_043320	59.8023	1.13185	0.410707	2.75585	0.00585399	0.0146355
ACA1_043330	3.30058	0.489306	0.570765	0.857281	0.391289	0.498049
ACA1_043340	168.666	0.0682904	0.141792	0.481625	0.630072	0.719627
ACA1_043350	241.903	-0.266431	0.125801	-2.11788	0.0341855	0.0666638
ACA1_043360	377.716	-0.58402	0.157163	-3.71601	0.00020239	0.000776042
ACA1_043570	30.5889	-0.836132	0.299508	-2.79169	0.00524342	0.013293
ACA1_043580	229.423	-0.810997	0.178515	-4.54301	5.54553e-06	3.18323e-05
ACA1_043590	48.4823	-0.548671	0.273024	-2.00961	0.0444723	0.0834354
ACA1_043600	1543.38	-0.281505	0.10629	-2.64845	0.00808614	0.0193265
ACA1_043610	129.894	0.553722	0.184627	2.99914	0.00270746	0.00749766
ACA1_043620	95.5612	-0.0356808	0.200173	-0.178249	0.858527	0.901454
ACA1_043630	198.747	0.376273	0.144536	2.60332	0.00923266	0.0216583
ACA1_043640	130.185	0.447458	0.308074	1.45244	0.14638	0.225277
ACA1_043650	319.521	0.944711	0.204983	4.60873	4.05142e-06	2.39016e-05
ACA1_043660	203.974	0.595779	0.198475	3.00179	0.00268399	0.00744448
ACA1_043670	840.253	0.618332	0.17858	3.4625	0.000535182	0.00183274
ACA1_043770	951.934	-0.367358	0.178675	-2.05602	0.039781	0.0758353
ACA1_043880	50.6082	-0.834071	0.259275	-3.21693	0.00129571	0.00394196
ACA1_043890	19.9908	0.13152	0.346671	0.379381	0.704405	0.779626
ACA1_044000	2.45904	-0.0498581	0.564631	-0.0883021	0.929637	0.954341
ACA1_044110	0.350135	0	0.360715	0	1	NA
ACA1_044120	78.3943	-0.289022	0.203554	-1.41988	0.155643	0.237044
ACA1_044130	91.9506	0.0664381	0.181052	0.366957	0.713651	0.787238
ACA1_044240	1.03442	-0.191094	0.548644	-0.348303	0.727613	0.79834
ACA1_044250	33.2917	-0.410311	0.375479	-1.09277	0.274496	0.375917
ACA1_044260	0	NA	NA	NA	NA	NA
ACA1_044360	421.642	0.81549	0.155172	5.2554	1.47706e-07	1.20297e-06
ACA1_044370	0	NA	NA	NA	NA	NA
ACA1_044380	0.0383185	-0.116003	0.164818	-0.703828	0.48154	NA
ACA1_044390	0	NA	NA	NA	NA	NA
ACA1_044400	0.00859187	0	0.164818	0	1	NA
ACA1_044410	103.603	4.13982	0.467765	8.85023	8.73415e-19	5.73595e-17
ACA1_044420	42.5356	1.85446	0.371686	4.9893	6.05981e-07	4.32997e-06
ACA1_044430	0	NA	NA	NA	NA	NA
ACA1_044440	0.02155	0	0.164818	0	1	NA
ACA1_044450	0	NA	NA	NA	NA	NA
ACA1_044460	296.484	1.06739	0.147041	7.25916	3.89489e-13	9.90727e-12
ACA1_044470	0.0734215	0	0.165671	0	1	NA
ACA1_044480	341.691	-0.0720333	0.126118	-0.571156	0.567894	0.663292
ACA1_044690	128.429	0.333199	0.154973	2.15005	0.0315516	0.0622587
ACA1_044700	198.67	-1.16125	0.3723	-3.11913	0.00181386	0.00527192
ACA1_044710	3145.62	-0.295152	0.0749003	-3.94059	8.12804e-05	0.000347746
ACA1_044720	69.6046	1.20213	0.205208	5.85811	4.68177e-09	5.30944e-08
ACA1_044730	63.2216	-1.31835	0.378802	-3.4803	0.000500846	0.00173281
ACA1_044740	3.9251	-1.43534	0.55908	-2.56733	0.0102484	0.023693
ACA1_044750	414.289	-0.339642	0.126476	-2.68543	0.00724359	0.017601
ACA1_044760	204.533	-0.0989399	0.146079	-0.677304	0.498213	0.600249
ACA1_044770	2813.17	0.0913404	0.110584	0.825985	0.408813	0.515448
ACA1_044780	1.02608	2.06792	0.541082	3.82182	0.000132472	0.000538991
ACA1_044890	284.17	-0.00133061	0.170593	-0.00779988	0.993777	0.999676
ACA1_044900	113.128	-0.345087	0.219202	-1.57429	0.115421	0.184837
ACA1_044910	483.322	0.631797	0.18398	3.43406	0.000594613	0.00201052
ACA1_044920	556.903	-0.133345	0.122547	-1.08811	0.276548	0.37795
ACA1_044930	292.915	-0.263379	0.23913	-1.10141	0.27072	0.371767
ACA1_044940	184.495	0.898348	0.220568	4.07289	4.64334e-05	0.000210502
ACA1_045050	22.2592	-0.599738	0.424004	-1.41446	0.157226	0.238965
ACA1_045060	806.585	-0.281679	0.13073	-2.15466	0.0311881	0.0616592
ACA1_045070	188.209	0.613266	0.216693	2.83012	0.00465306	0.01196
ACA1_045080	318.874	0.994131	0.187456	5.30326	1.13751e-07	9.49982e-07
ACA1_045090	217.786	0.671809	0.221426	3.03401	0.00241323	0.00678917
ACA1_045200	468.376	-0.286062	0.126793	-2.25613	0.0240625	0.0492459
ACA1_045210	81.2301	-0.433102	0.181612	-2.38477	0.01709	0.0366835
ACA1_045220	99.131	-0.241859	0.20052	-1.20616	0.227756	0.32337
ACA1_045230	294.461	-0.277674	0.129611	-2.14237	0.0321639	0.0633025
ACA1_045240	1130.15	-1.13326	0.232437	-4.87555	1.08505e-06	7.26451e-06
ACA1_045250	144.524	-0.182935	0.157862	-1.15883	0.246526	0.345017
ACA1_045260	74.4192	-0.312613	0.401133	-0.779325	0.435788	0.541522
ACA1_045270	239.823	0.642428	0.14916	4.30698	1.65496e-05	8.39862e-05
ACA1_045280	322.35	-0.41633	0.166252	-2.50422	0.0122721	0.0277091
ACA1_045290	3.12376	-0.0500663	0.574982	-0.0870745	0.930612	0.955025
ACA1_045300	52.9879	-0.0833239	0.289954	-0.28737	0.773829	0.836052
ACA1_045310	3160.77	0.218658	0.0994261	2.1992	0.0278634	0.0559593
ACA1_045320	1.0158	-0.45779	0.53858	-0.849995	0.395328	0.501906
ACA1_045330	1.02308	-0.19108	0.5248	-0.3641	0.715783	0.788491
ACA1_045340	809.335	-0.0917418	0.145439	-0.630792	0.528177	0.627597
ACA1_045350	116.899	0.612798	0.1921	3.19	0.00142273	0.00427705
ACA1_045360	50.2106	-2.91783	0.367405	-7.9417	1.99422e-15	7.6629e-14
ACA1_045370	601.718	-0.21983	0.168158	-1.30729	0.191115	0.280555
ACA1_045380	1498.98	-0.454871	0.195787	-2.3233	0.0201631	0.0422734
ACA1_045390	85.2321	0.626854	0.384462	1.63047	0.103001	0.168268
ACA1_045400	106.277	0.168262	0.246283	0.683206	0.494477	0.596792
ACA1_045410	423.643	-0.835264	0.146671	-5.69482	1.23499e-08	1.28646e-07
ACA1_045420	339.128	-0.0718316	0.2519	-0.28516	0.775522	0.837237
ACA1_045430	0.232465	0	0.296266	0	1	NA
ACA1_045440	979.811	2.19317	0.176275	12.4418	1.5502e-35	1.47447e-32
ACA1_045450	115.612	2.15285	0.221026	9.74026	2.03044e-22	2.36579e-20
ACA1_045460	301.497	1.01335	0.177456	5.71046	1.12673e-08	1.18565e-07
ACA1_045470	492.988	-0.326192	0.10964	-2.97513	0.00292862	0.0080364
ACA1_045480	13.0581	-0.851244	0.391416	-2.17478	0.0296465	0.0590072
ACA1_045590	76.7096	-0.353282	0.207	-1.70668	0.0878813	0.14694
ACA1_045600	160.108	-0.517063	0.182425	-2.83439	0.0045913	0.0118318
ACA1_045610	10.8372	-0.534569	0.435592	-1.22722	0.219738	0.314397
ACA1_045620	0.250566	-0.279302	0.257976	-1.08267	0.278956	NA
ACA1_045630	81.7308	0.0513326	0.29005	0.176979	0.859525	0.902239
ACA1_045640	192.056	-0.515704	0.13931	-3.70184	0.000214038	0.000816805
ACA1_045650	519.93	0.0207694	0.486968	0.0426504	0.96598	0.981034
ACA1_045660	2.21124	0.0881397	0.564063	0.156259	0.875829	0.915004
ACA1_045670	75.9357	1.31486	0.267015	4.92428	8.46712e-07	5.83093e-06
ACA1_045680	139.211	0.713618	0.168095	4.24533	2.18272e-05	0.000107594
ACA1_045690	175.114	0.213473	0.287147	0.743426	0.457224	0.561684
ACA1_045700	344.538	-0.679463	0.128009	-5.30792	1.10882e-07	9.28712e-07
ACA1_045710	147.746	-0.695247	0.140875	-4.93521	8.00633e-07	5.55064e-06
ACA1_045720	521.434	-0.655397	0.138565	-4.72988	2.24656e-06	1.40148e-05
ACA1_045920	4.28122	-0.0793206	0.531373	-0.149275	0.881337	0.918396
ACA1_045930	67.4035	-0.913773	0.276331	-3.30681	0.00094366	0.0029932
ACA1_045940	0.0341709	0	0.164818	0	1	NA
ACA1_045950	164.189	-0.080063	0.179058	-0.447136	0.654777	0.740526
ACA1_045960	81.0664	0.394371	0.185316	2.1281	0.0333287	0.065213
ACA1_045970	143.288	0.13819	0.2197	0.628994	0.529353	0.628483
ACA1_045980	2.95578	-0.137039	0.574057	-0.238721	0.811322	0.864644
ACA1_045990	68.1866	-2.60312	0.564065	-4.61492	3.93247e-06	2.32663e-05
ACA1_046000	177.15	-0.535274	0.265743	-2.01426	0.0439825	0.0826668
ACA1_046010	294.895	-0.898537	0.219663	-4.09052	4.30406e-05	0.000196664
ACA1_046020	51.464	0.456586	0.255613	1.78624	0.0740604	0.127399
ACA1_046030	45.5432	0.024281	0.260355	0.0932612	0.925696	0.951851
ACA1_046040	48.1785	0.188053	0.241982	0.777137	0.437078	0.542784
ACA1_046050	515.141	-1.05688	0.344855	-3.06471	0.00217882	0.00620655
ACA1_046060	155.133	1.54934	0.187663	8.25594	1.50711e-16	6.9489e-15
ACA1_046070	92.9321	-0.331286	0.168167	-1.96998	0.0488411	0.0901566
ACA1_046080	100.695	0.529273	0.179361	2.95089	0.00316863	0.00859241
ACA1_046090	1036.56	-0.754216	0.102336	-7.36997	1.70667e-13	4.62627e-12
ACA1_046100	4.07102	0.123639	0.537065	0.230212	0.817927	0.869439
ACA1_046110	0.437177	-0.31573	0.439099	-0.719042	0.472115	0.575428
ACA1_046120	55.4486	0.120372	0.22626	0.532006	0.594722	0.688009
ACA1_046130	412.845	-0.148137	0.184666	-0.802186	0.422445	0.528578
ACA1_046140	2.17356	-0.130071	0.575497	-0.226016	0.821189	0.872265
ACA1_046150	1410.3	0.464283	0.139823	3.3205	0.000898558	0.0028703
ACA1_046160	144.57	-1.16257	0.230754	-5.03813	4.70103e-07	3.43727e-06
ACA1_046170	73.6834	-0.0281399	0.304494	-0.0924153	0.926368	0.952339
ACA1_046180	600.343	0.540483	0.168331	3.21084	0.00132346	0.00400867
ACA1_046390	516.184	1.37668	0.304159	4.52619	6.0058e-06	3.41352e-05
ACA1_046400	37.4867	-1.01196	0.511152	-1.97977	0.0477299	0.0884445
ACA1_046410	374.563	0.338759	0.155031	2.18511	0.0288807	0.0577535
ACA1_046420	793.064	0.278564	0.1001	2.78284	0.00538849	0.013604
ACA1_046430	398.216	-0.584053	0.162162	-3.60167	0.000316177	0.00115444
ACA1_046440	78.052	-1.20198	0.364142	-3.30085	0.00096393	0.00304987
ACA1_046450	43.0906	0.403612	0.235727	1.7122	0.0868594	0.145518
ACA1_046460	216.748	0.698871	0.309825	2.2557	0.0240896	0.0492775
ACA1_046470	1890.45	-1.00479	0.210419	-4.7752	1.7953e-06	1.14823e-05
ACA1_046480	151.643	-0.343933	0.17502	-1.96511	0.0494013	0.0909815
ACA1_046490	1198.24	-0.914271	0.234068	-3.90601	9.38338e-05	0.000395944
ACA1_046500	88.5662	-1.25821	0.255405	-4.9263	8.37994e-07	5.77916e-06
ACA1_046510	143.3	0.0491856	0.150297	0.327257	0.743474	0.811675
ACA1_046520	70.4454	0.782073	0.221514	3.53058	0.000414649	0.00147158
ACA1_046530	119.127	-1.19835	0.213447	-5.61426	1.97409e-08	1.96431e-07
ACA1_046540	93.7903	-0.0942988	0.181831	-0.518606	0.604035	0.696663
ACA1_046550	503.149	0.385389	0.192435	2.00269	0.0452101	0.0845779
ACA1_046560	177.883	-0.611436	0.18311	-3.33918	0.000840264	0.00270382
ACA1_046570	245.017	0.0499504	0.130243	0.383517	0.701336	0.77754
ACA1_046580	305.751	0.276536	0.161684	1.71034	0.0872026	0.145976
ACA1_046590	467.676	-0.425342	0.24216	-1.75645	0.0790122	0.134349
ACA1_046600	89.8151	-0.225223	0.212302	-1.06086	0.288754	0.390813
ACA1_046610	3.05599	0.0912971	0.50934	0.179246	0.857745	0.901156
ACA1_046620	6.52163	-1.6092	0.567037	-2.83791	0.00454097	0.0117283
ACA1_046630	41.4771	-0.158677	0.240782	-0.659009	0.50989	0.610749
ACA1_046640	130.989	-0.186501	0.166833	-1.11789	0.263614	0.364016
ACA1_046650	7.79201	-0.228351	0.479771	-0.475959	0.634104	0.722968
ACA1_046660	582.467	-0.522419	0.10643	-4.90856	9.17466e-07	6.25557e-06
ACA1_046670	7.92125	-0.323323	0.575022	-0.562279	0.573926	0.668726
ACA1_046680	466.946	-0.264475	0.111647	-2.36886	0.0178432	0.0380684
ACA1_046690	52.6223	0.480516	0.254819	1.88571	0.0593337	0.105912
ACA1_046700	612.049	1.10605	0.208881	5.29513	1.18934e-07	9.89835e-07
ACA1_046710	6.99545	2.94167	0.557462	5.27689	1.31395e-07	1.08403e-06
ACA1_046720	20.7746	-2.89945	0.545437	-5.31582	1.06176e-07	8.94483e-07
ACA1_046730	267.718	1.0022	0.169797	5.90235	3.58366e-09	4.15054e-08
ACA1_046740	249.945	0.0356407	0.189742	0.187837	0.851004	0.895964
ACA1_046850	33.2654	-0.839092	0.287434	-2.91925	0.00350873	0.00939998
ACA1_046860	0.303782	-0.159913	0.31978	-0.500072	0.617024	NA
ACA1_046870	320.291	1.53191	0.279906	5.47295	4.42617e-08	4.05513e-07
ACA1_046970	400.202	1.21095	0.195554	6.19243	5.92454e-10	8.05247e-09
ACA1_047280	346.994	0.860947	0.146493	5.87706	4.17609e-09	4.78858e-08
ACA1_047290	538.467	1.18645	0.178773	6.63666	3.2086e-11	5.73736e-10
ACA1_047400	49.5909	0.9669	0.249199	3.88003	0.000104442	0.000435139
ACA1_047410	28.2031	0.549535	0.327423	1.67836	0.0932764	0.154442
ACA1_047520	0.415443	0.597566	0.429587	1.39102	0.164218	0.247819
ACA1_047630	304.176	0.677384	0.142464	4.75478	1.98667e-06	1.25672e-05
ACA1_047640	186.832	0.640118	0.166707	3.83977	0.00012315	0.000505332
ACA1_047650	70.5038	0.35945	0.21672	1.65859	0.0971986	0.159928
ACA1_047660	0	NA	NA	NA	NA	NA
ACA1_047670	0	NA	NA	NA	NA	NA
ACA1_047680	0.26394	0	0.242377	0	1	NA
ACA1_047790	0.0274538	0	0.164818	0	1	NA
ACA1_047800	0.20695	0	0.171936	0	1	NA
ACA1_047810	0.071807	-0.114437	0.165362	-0.692039	0.488913	NA
ACA1_047820	6.46579	-0.645858	0.50476	-1.27954	0.200709	0.292417
ACA1_047930	276.031	1.09481	0.194344	5.63337	1.76724e-08	1.77807e-07
ACA1_048030	80.2187	-1.24001	0.270766	-4.57964	4.65772e-06	2.72228e-05
ACA1_048040	163.099	-0.251063	0.201933	-1.2433	0.213757	0.307513
ACA1_048050	2509.43	-0.932101	0.121419	-7.67676	1.63168e-14	5.41943e-13
ACA1_048060	567.313	0.809048	0.141822	5.70467	1.16566e-08	1.22216e-07
ACA1_048070	38.3187	-1.99641	0.400841	-4.98055	6.34024e-07	4.50585e-06
ACA1_048080	883.329	0.168675	0.251991	0.669369	0.50326	0.604716
ACA1_048090	189.704	0.502282	0.125224	4.01107	6.04441e-05	0.000267226
ACA1_048100	1.30769	0	0.446413	0	1	1
ACA1_048110	5186.98	-1.00244	0.0913479	-10.9739	5.10234e-28	1.24947e-25
ACA1_048120	463.449	0.258265	0.147112	1.75557	0.0791625	0.134558
ACA1_048130	323.414	1.01961	0.158588	6.42927	1.28218e-10	2.0114e-09
ACA1_048140	275.099	0.552333	0.185716	2.97408	0.00293871	0.00805818
ACA1_048150	598.779	-0.149567	0.129115	-1.1584	0.246702	0.345149
ACA1_048160	191.022	0.933002	0.173354	5.38205	7.36426e-08	6.46408e-07
ACA1_048170	1300.98	-0.707309	0.24816	-2.85021	0.004369	0.0113633
ACA1_048180	32.1838	-0.149527	0.306871	-0.487264	0.626071	0.716278
ACA1_048190	282.507	-0.592145	0.161795	-3.65984	0.000252369	0.000943395
ACA1_048200	1471.51	0.212078	0.157723	1.34463	0.178746	0.266102
ACA1_048210	19572.9	-0.403529	0.109118	-3.69811	0.000217211	0.00082651
ACA1_048220	785.452	-0.394204	0.12764	-3.08841	0.00201231	0.0057801
ACA1_048230	395.121	0.529406	0.111551	4.74585	2.07629e-06	1.30711e-05
ACA1_048240	83.572	-0.23831	0.209784	-1.13598	0.255965	0.355629
ACA1_048250	1729.6	0.0823412	0.0889901	0.925284	0.354818	0.461174
ACA1_048260	9.9968	-1.04551	0.447589	-2.33588	0.0194977	0.0410885
ACA1_048370	133.487	-0.630479	0.184324	-3.42048	0.000625099	0.00209692
ACA1_048380	139.197	0.523412	0.157374	3.32592	0.000881281	0.00282197
ACA1_048390	99.2956	-0.62601	0.19412	-3.22487	0.00126032	0.00385459
ACA1_048400	2143.03	-1.22636	0.283363	-4.32788	1.5055e-05	7.70782e-05
ACA1_048410	497.288	-0.32238	0.243059	-1.32635	0.184725	0.273007
ACA1_048420	131.236	0.245706	0.22046	1.11452	0.265058	0.365799
ACA1_048430	76.2449	-0.114192	0.180611	-0.632255	0.52722	0.626834
ACA1_048440	192.892	-0.628559	0.567388	-1.10781	0.267943	0.368851
ACA1_048450	259.547	-0.830569	0.549079	-1.51266	0.130366	0.204821
ACA1_048460	300.302	-0.222046	0.161827	-1.37212	0.170028	0.254909
ACA1_048470	1693.59	-0.0599494	0.139413	-0.430014	0.667185	0.751442
ACA1_048480	176.645	-0.0464462	0.197656	-0.234985	0.81422	0.866646
ACA1_048490	3753.26	0.506298	0.119595	4.23344	2.30145e-05	0.000112869
ACA1_048500	907.304	1.06955	0.118242	9.04545	1.49045e-19	1.13337e-17
ACA1_048510	172.203	0.412478	0.155453	2.65339	0.00796874	0.0190806
ACA1_048520	39.784	-0.848464	0.250208	-3.39104	0.000696285	0.00229679
ACA1_048530	2563.48	-0.200822	0.0998336	-2.01156	0.0442659	0.0831129
ACA1_048540	47.2565	0.174411	0.282669	0.617016	0.537224	0.635433
ACA1_048550	1269.41	0.871999	0.105307	8.28058	1.22573e-16	5.71271e-15
ACA1_048560	588.307	0.679702	0.113413	5.99317	2.05786e-09	2.50903e-08
ACA1_048570	177.359	-0.00107429	0.143285	-0.00749759	0.994018	0.999831
ACA1_048580	114.911	-0.697016	0.212324	-3.28279	0.00102786	0.00323047
ACA1_048590	124.14	-0.275159	0.178205	-1.54406	0.122574	0.19446
ACA1_048600	41.6978	-0.39864	0.271065	-1.47064	0.141388	0.219011
ACA1_048610	0	NA	NA	NA	NA	NA
ACA1_048620	199.412	-0.0436806	0.162686	-0.268496	0.788318	0.846811
ACA1_048630	4927.03	0.763737	0.170629	4.47601	7.60499e-06	4.19858e-05
ACA1_048640	665.64	0.183783	0.0963049	1.90834	0.0563467	0.101445
ACA1_048650	1489.92	0.357258	0.111813	3.19515	0.0013976	0.00421292
ACA1_048850	645.82	1.50925	0.237736	6.34843	2.17518e-10	3.22991e-09
ACA1_048860	818.566	0.0452393	0.148724	0.304182	0.760989	0.82621
ACA1_048870	160.61	-0.79699	0.189851	-4.19798	2.69305e-05	0.000129597
ACA1_048880	743.516	0.296035	0.234113	1.26449	0.206053	0.298691
ACA1_048890	91.1972	0.296437	0.221264	1.33974	0.180329	0.267961
ACA1_049090	100.299	0.529733	0.176591	2.99977	0.00270185	0.00748683
ACA1_049200	54.5198	-0.834852	0.231005	-3.614	0.000301514	0.00110509
ACA1_049210	302.036	-0.198981	0.103394	-1.9245	0.0542922	0.0985073
ACA1_049320	323.427	-0.285295	0.120375	-2.37005	0.0177856	0.0379567
ACA1_049330	11.4011	0.0334026	0.410663	0.0813383	0.935173	0.958217
ACA1_049530	22.9662	1.6839	0.469517	3.58645	0.000335204	0.00121807
ACA1_049640	202.841	0.75817	0.148425	5.10809	3.25433e-07	2.45143e-06
ACA1_049750	0.218648	0.0749871	0.255831	0.293112	0.769437	NA
ACA1_049760	7.59085	-0.181908	0.535315	-0.339814	0.733996	0.803723
ACA1_049970	469.907	0.854866	0.358827	2.38239	0.0172005	0.0368769
ACA1_049980	328.251	-0.0511915	0.128904	-0.397129	0.691272	0.770046
ACA1_049990	2182.25	0.498895	0.101673	4.90687	9.25432e-07	6.30096e-06
ACA1_050000	131.908	-0.57678	0.201728	-2.85919	0.00424719	0.0110864
ACA1_050010	177.435	-0.370491	0.190779	-1.94199	0.0521382	0.0951968
ACA1_050120	464.098	1.13695	0.213556	5.32389	1.0157e-07	8.59179e-07
ACA1_050130	200.769	-0.0409209	0.144151	-0.283875	0.776506	0.837861
ACA1_050140	266.276	-0.16971	0.133771	-1.26866	0.204563	0.297038
ACA1_050150	150.004	-0.35652	0.154675	-2.30497	0.0211684	0.0441202
ACA1_050160	504.865	0.130311	0.129189	1.00869	0.313125	0.417269
ACA1_050170	75.135	-0.76322	0.319481	-2.38894	0.0168971	0.0363774
ACA1_050180	1984.62	-0.71573	0.14952	-4.78687	1.69405e-06	1.08829e-05
ACA1_050190	210.682	1.09506	0.205038	5.34074	9.25668e-08	7.90896e-07
ACA1_050200	49.4716	-0.332884	0.355163	-0.937271	0.348619	0.454466
ACA1_050210	153.978	-0.149047	0.172953	-0.861775	0.388812	0.495331
ACA1_050220	280.568	1.83352	0.319205	5.74401	9.24595e-09	9.89867e-08
ACA1_050330	1080.57	0.039634	0.178417	0.222143	0.824203	0.874565
ACA1_050340	1911.19	0.203744	0.112897	1.80468	0.0711249	0.123199
ACA1_050350	1722.21	0.084444	0.121331	0.695979	0.486442	0.589215
ACA1_050360	1070.43	-0.227803	0.0944874	-2.41094	0.0159116	0.0345545
ACA1_050370	532.112	0.00956297	0.174325	0.054857	0.956252	0.973362
ACA1_050380	427.534	-0.775482	0.245706	-3.15614	0.00159871	0.00472646
ACA1_050390	163.774	-4.23654	0.519125	-8.16093	3.32463e-16	1.46446e-14
ACA1_050400	2882.32	-2.95656	0.472704	-6.25457	3.98618e-10	5.61329e-09
ACA1_050410	3.23578	0.639353	0.556323	1.14925	0.250454	0.349485
ACA1_050420	9.53809	-0.0656097	0.470279	-0.139512	0.889045	0.924628
ACA1_050430	160.78	-0.224267	0.184872	-1.21309	0.225094	0.320473
ACA1_050440	75.9793	-0.726135	0.24155	-3.00615	0.00264576	0.0073509
ACA1_050450	91.181	-0.00251885	0.207703	-0.0121272	0.990324	0.997365
ACA1_050460	252.405	1.18835	0.146063	8.13587	4.08987e-16	1.76917e-14
ACA1_050470	92.6423	-0.805571	0.427438	-1.88465	0.0594769	0.106018
ACA1_050480	26.5714	-0.956134	0.370449	-2.58101	0.00985109	0.0229156
ACA1_050490	315.112	-0.439466	0.239429	-1.83547	0.0664356	0.116234
ACA1_050500	4.39231	1.76755	0.540254	3.27171	0.001069	0.00333998
ACA1_050510	362.188	0.131316	0.179209	0.732757	0.463707	0.567237
ACA1_050520	232.578	-0.566084	0.119267	-4.74635	2.07115e-06	1.30559e-05
ACA1_050620	54.9046	0.0854666	0.250969	0.340546	0.733445	0.803276
ACA1_050630	23.8815	-1.22132	0.42661	-2.86284	0.00419858	0.0109714
ACA1_050740	82.4254	-0.271951	0.220841	-1.23143	0.218161	0.312418
ACA1_050750	0.435958	-0.220238	0.339463	-0.648784	0.516478	0.617057
ACA1_050760	188.487	-0.319345	0.142049	-2.24813	0.024568	0.0501424
ACA1_050860	27.1492	0.843896	0.328649	2.56777	0.0102355	0.0236727
ACA1_050870	485.826	1.11025	0.134626	8.24693	1.6252e-16	7.43068e-15
ACA1_050880	107.34	0.385433	0.197287	1.95366	0.0507411	0.0929396
ACA1_050990	123.944	0.324717	0.167835	1.93473	0.0530231	0.0965441
ACA1_051000	7.91805	-0.824299	0.467423	-1.7635	0.0778169	0.132598
ACA1_051110	133.632	-0.855742	0.308479	-2.77407	0.00553596	0.0139199
ACA1_051220	12.9901	-0.602263	0.392896	-1.53288	0.125305	0.198011
ACA1_051330	30.1426	-0.372554	0.337293	-1.10454	0.269359	0.370391
ACA1_051440	344.604	-0.446558	0.14713	-3.03513	0.00240432	0.00677277
ACA1_051450	206.51	-0.0193009	0.152202	-0.126811	0.89909	0.931988
ACA1_051460	10.173	2.02951	0.523141	3.87947	0.000104683	0.000435995
ACA1_051470	25.3457	2.45939	0.484809	5.07291	3.91786e-07	2.91329e-06
ACA1_051480	12618.7	-0.356465	0.101558	-3.50998	0.000448147	0.00157462
ACA1_051490	342.803	0.179715	0.3866	0.464859	0.642032	0.729247
ACA1_051500	108.773	-1.00307	0.271644	-3.69261	0.000221968	0.000841951
ACA1_051510	129.245	-0.16965	0.242857	-0.698559	0.484828	0.587502
ACA1_051520	0.36505	0	0.307934	0	1	NA
ACA1_051530	326.85	-0.787584	0.230064	-3.42332	0.000618604	0.00207948
ACA1_051540	91.8522	-1.19327	0.330836	-3.60683	0.000309962	0.00113433
ACA1_051550	1856.09	-0.825405	0.178698	-4.61899	3.85616e-06	2.28898e-05
ACA1_051660	252.296	-0.228383	0.135114	-1.6903	0.0909714	0.15118
ACA1_051670	116.412	-0.361113	0.188226	-1.9185	0.0550471	0.0996143
ACA1_051680	41.8229	-0.668801	0.306485	-2.18217	0.0290973	0.0581222
ACA1_051690	402.093	-0.23197	0.113466	-2.0444	0.040914	0.0776969
ACA1_051700	324.076	-0.27577	0.103467	-2.66529	0.00769215	0.0185431
ACA1_051710	286.389	0.833562	0.134032	6.21913	4.99906e-10	6.8787e-09
ACA1_051820	1118.49	0.189694	0.101912	1.86135	0.0626942	0.110599
ACA1_051830	439.9	-0.907053	0.521397	-1.73966	0.0819187	0.138283
ACA1_051840	481.587	0.124086	0.170039	0.729753	0.465541	0.568999
ACA1_051850	4943.03	-0.149809	0.140757	-1.06431	0.287188	0.389239
ACA1_051860	529.647	0.0149544	0.115115	0.129909	0.896639	0.930235
ACA1_051870	1329.11	0.0144901	0.0826021	0.17542	0.86075	0.902811
ACA1_051880	1131.54	1.35051	0.18941	7.13008	1.00313e-12	2.3301e-11
ACA1_051890	19.4669	-0.327291	0.394142	-0.830388	0.40632	0.512977
ACA1_051900	25.6071	-0.512682	0.320083	-1.60171	0.109219	0.176786
ACA1_051910	139.353	-0.905824	0.195107	-4.64269	3.43901e-06	2.06084e-05
ACA1_051920	180.734	0.524255	0.179949	2.91335	0.00357568	0.00955863
ACA1_051930	87.7063	0.710029	0.247892	2.86427	0.00417978	0.0109322
ACA1_051940	276.488	-0.413775	0.13942	-2.96783	0.00299906	0.00819101
ACA1_051950	25.5636	-0.519355	0.377064	-1.37737	0.168399	0.252835
ACA1_052060	54.2249	-0.0227063	0.24036	-0.0944679	0.924737	0.951201
ACA1_052070	4.46971	-0.858159	0.517169	-1.65934	0.0970478	0.159698
ACA1_052170	9.4353	-0.355028	0.483059	-0.734957	0.462366	0.566247
ACA1_052180	143.205	0.457206	0.153873	2.97132	0.00296522	0.008117
ACA1_052190	926.363	0.610716	0.140598	4.34369	1.40108e-05	7.24251e-05
ACA1_052200	167.919	0.345266	0.213976	1.61357	0.10662	0.173166
ACA1_052210	379.559	-0.349413	0.118437	-2.9502	0.00317572	0.0086084
ACA1_052220	374.758	-0.351096	0.161069	-2.17978	0.0292737	0.0584019
ACA1_052230	35.3732	0.660102	0.381932	1.72832	0.0839305	0.141167
ACA1_052240	193.096	0.412808	0.19968	2.06735	0.0387016	0.074067
ACA1_052250	574.928	-0.314656	0.12769	-2.46422	0.0137312	0.0304979
ACA1_052260	268.059	0.850199	0.209653	4.05527	5.00765e-05	0.000225461
ACA1_052270	102.165	1.52284	0.201799	7.54636	4.47604e-14	1.37595e-12
ACA1_052280	50.8335	0.758572	0.284496	2.66637	0.00766753	0.0184942
ACA1_052290	40.2945	0.144126	0.265657	0.542525	0.587457	0.681241
ACA1_052300	45.027	-0.630497	0.281718	-2.23804	0.0252184	0.0513177
ACA1_052310	176.621	-2.20785	0.509815	-4.33069	1.48643e-05	7.62371e-05
ACA1_052320	57.0773	0.813682	0.277162	2.93576	0.00332732	0.0089806
ACA1_052330	385.386	0.190159	0.128749	1.47698	0.13968	0.216883
ACA1_052340	5.04508	0.404281	0.539896	0.748814	0.453969	0.558731
ACA1_052350	85.5113	-0.893636	0.434884	-2.05488	0.0398905	0.076024
ACA1_052360	639.32	1.47146	0.201279	7.31054	2.6607e-13	6.98941e-12
ACA1_052370	0.23762	0	0.306491	0	1	NA
ACA1_052380	218.461	-0.704376	0.135046	-5.21581	1.83019e-07	1.4534e-06
ACA1_052390	305.841	0.283213	0.179021	1.58201	0.113647	0.182664
ACA1_052400	502.662	-0.00449683	0.0815626	-0.0551335	0.956032	0.973337
ACA1_052410	36.1089	0.27869	0.271141	1.02784	0.304024	0.40785
ACA1_052420	0.0547494	0	0.165292	0	1	NA
ACA1_052430	311.408	-0.536179	0.158131	-3.39073	0.000697072	0.00229886
ACA1_052440	307.538	0.0104457	0.111406	0.093762	0.925298	0.951645
ACA1_052450	59.8339	-0.991387	0.489407	-2.02569	0.0427965	0.0807949
ACA1_052460	98.0556	-0.00956807	0.219469	-0.0435965	0.965226	0.980426
ACA1_052470	1.25303	-0.199484	0.556404	-0.358524	0.719951	0.791738
ACA1_052480	825.405	1.79087	0.335178	5.34304	9.13982e-08	7.81373e-07
ACA1_052490	141.735	1.65401	0.221623	7.46317	8.44662e-14	2.43101e-12
ACA1_052500	261.288	0.437445	0.18323	2.38741	0.0169676	0.0364804
ACA1_052510	450.955	1.20645	0.159957	7.54231	4.61715e-14	1.41332e-12
ACA1_052520	86.7634	-0.804621	0.247089	-3.25641	0.00112832	0.00350204
ACA1_052530	333.248	-0.778234	0.230805	-3.37183	0.000746715	0.00243342
ACA1_052540	73.237	-0.082724	0.217822	-0.379778	0.70411	0.779626
ACA1_052550	0.226105	0.0842395	0.274319	0.307085	0.758778	NA
ACA1_052560	3.97637	1.19203	0.563742	2.11449	0.0344734	0.0671436
ACA1_052570	152.092	-0.254326	0.310537	-0.818987	0.412794	0.519199
ACA1_052580	464.254	0.90356	0.21223	4.25747	2.06756e-05	0.000102442
ACA1_052590	168.583	0.714268	0.19231	3.71416	0.000203882	0.000781143
ACA1_052600	131.851	0.540986	0.210722	2.5673	0.0102492	0.023693
ACA1_052610	703.907	-0.489432	0.168388	-2.90657	0.00365415	0.00973003
ACA1_052620	266.436	-0.532809	0.217757	-2.4468	0.014413	0.0318341
ACA1_052630	179.55	0.05365	0.25667	0.209024	0.83443	0.882984
ACA1_052640	657.402	0.006652	0.161572	0.0411706	0.96716	0.981701
ACA1_052650	53.2831	1.22135	0.222664	5.48515	4.13117e-08	3.80901e-07
ACA1_052660	344.203	0.0579869	0.143546	0.403961	0.686241	0.766451
ACA1_052670	190.058	-0.418063	0.160406	-2.60627	0.00915336	0.0215002
ACA1_052680	122.987	1.03607	0.254737	4.0672	4.75808e-05	0.000215231
ACA1_052690	215.942	0.797066	0.185989	4.28556	1.82283e-05	9.19884e-05
ACA1_052700	422.001	0.0720816	0.387734	0.185905	0.85252	0.897232
ACA1_052710	906.681	0.763998	0.182103	4.19542	2.72367e-05	0.000130823
ACA1_052720	455.548	0.118992	0.151958	0.78306	0.433592	0.539349
ACA1_052730	236.109	-0.328239	0.123713	-2.65323	0.00797246	0.0190863
ACA1_052740	58.6388	-0.897665	0.468901	-1.9144	0.055569	0.10032
ACA1_052750	197.699	0.393709	0.219466	1.79395	0.0728219	0.125613
ACA1_052760	6.60133	-0.267317	0.531386	-0.503056	0.614925	0.70601
ACA1_052770	58.8758	1.40317	0.355878	3.94283	8.05246e-05	0.000344921
ACA1_052780	427.625	0.301881	0.133334	2.2641	0.0235678	0.0484087
ACA1_052790	1553.77	-0.597621	0.139312	-4.28979	1.78842e-05	9.03466e-05
ACA1_052800	79.4936	-0.00982763	0.445637	-0.022053	0.982406	0.991767
ACA1_052810	588.001	0.250826	0.159149	1.57605	0.115015	0.184289
ACA1_052820	202.292	0.0447891	0.154234	0.290398	0.771512	0.834279
ACA1_052830	750.293	0.117047	0.12637	0.926224	0.35433	0.460664
ACA1_052840	1023.21	-0.547777	0.328683	-1.66658	0.0955976	0.157617
ACA1_052850	918.321	0.290476	0.178072	1.63123	0.102842	0.168046
ACA1_052860	63.4075	-0.294042	0.204282	-1.43939	0.150039	0.230018
ACA1_052870	96.3985	-0.57585	0.15967	-3.60649	0.000310363	0.00113551
ACA1_052880	2.37681	-0.457708	0.56912	-0.804238	0.42126	0.52746
ACA1_052890	20.0203	-0.682644	0.344121	-1.98374	0.0472853	0.0877902
ACA1_053000	22.0774	-0.436488	0.304371	-1.43406	0.151554	0.23198
ACA1_053110	770.571	-0.236995	0.238585	-0.993336	0.320546	0.425119
ACA1_053220	446.374	-0.913949	0.452495	-2.0198	0.0434041	0.081739
ACA1_053230	92.5121	-0.987614	0.238253	-4.14523	3.39469e-05	0.000159035
ACA1_053240	6882.53	-0.826979	0.10381	-7.96629	1.63513e-15	6.40227e-14
ACA1_053250	239.391	-0.911946	0.228796	-3.98585	6.72389e-05	0.000293495
ACA1_053260	1058.85	0.825688	0.189944	4.347	1.38013e-05	7.14187e-05
ACA1_053270	163.495	-0.157856	0.162247	-0.972941	0.330583	0.435433
ACA1_053280	3802.76	0.196122	0.0955101	2.05342	0.0400321	0.0762737
ACA1_053290	7094.83	0.6537	0.145794	4.48373	7.33481e-06	4.06807e-05
ACA1_053300	1986.08	-0.432412	0.137863	-3.13653	0.00170958	0.00500201
ACA1_053310	54.1492	-0.989212	0.252496	-3.91773	8.93861e-05	0.000379169
ACA1_053320	97.2027	0.0169621	0.181683	0.0933612	0.925617	0.951837
ACA1_053330	0	NA	NA	NA	NA	NA
ACA1_053340	750.73	0.438674	0.126599	3.46506	0.000530103	0.00181922
ACA1_053350	140.01	1.0993	0.178445	6.16044	7.25433e-10	9.62448e-09
ACA1_053360	212.684	0.236464	0.132246	1.78806	0.0737656	0.126968
ACA1_053370	226.968	0.210966	0.129109	1.63402	0.102255	0.167273
ACA1_053380	32.4936	-0.533207	0.299497	-1.78034	0.07502	0.128784
ACA1_053390	166.572	-0.937108	0.165093	-5.67624	1.37689e-08	1.41994e-07
ACA1_053400	2518.13	-0.0776559	0.138714	-0.559826	0.575598	0.670286
ACA1_053410	122.146	-0.719493	0.183579	-3.91926	8.88224e-05	0.000376898
ACA1_053420	158.004	-0.401289	0.177699	-2.25826	0.0239296	0.0489919
ACA1_053430	52.12	-0.474404	0.305278	-1.55401	0.120182	0.191064
ACA1_053440	535.233	-0.171633	0.127847	-1.34249	0.179437	0.266911
ACA1_053450	241.949	-0.659399	0.145181	-4.54191	5.5747e-06	3.19743e-05
ACA1_053460	24.0239	-0.36068	0.338532	-1.06542	0.286685	0.388813
ACA1_053470	178.529	0.0949252	0.149967	0.632976	0.52675	0.62648
ACA1_053480	121.691	-2.06259	0.463333	-4.45163	8.52201e-06	4.64276e-05
ACA1_053490	168.504	-0.674063	0.157325	-4.28453	1.83125e-05	9.22266e-05
ACA1_053600	295.832	-0.464105	0.17621	-2.63382	0.00844312	0.0200668
ACA1_053610	329.618	-0.698125	0.240448	-2.90344	0.00369093	0.00981891
ACA1_053620	77.5969	-0.837093	0.529818	-1.57996	0.114115	0.183091
ACA1_053630	314.798	-0.122679	0.128725	-0.953032	0.340574	0.445788
ACA1_053640	1069.88	0.749606	0.110729	6.76972	1.29034e-11	2.46598e-10
ACA1_053650	377.57	0.140955	0.143058	0.985304	0.324475	0.429191
ACA1_053660	2600.87	0.483673	0.135629	3.56616	0.000362255	0.00130423
ACA1_053670	1545.33	0.782013	0.171079	4.57105	4.85279e-06	2.82372e-05
ACA1_053780	754.447	0.106152	0.120821	0.878589	0.379624	0.486587
ACA1_053790	355.501	0.449249	0.0989954	4.53808	5.67679e-06	3.24696e-05
ACA1_053800	656.72	0.902585	0.123864	7.2869	3.17171e-13	8.19765e-12
ACA1_053810	0	NA	NA	NA	NA	NA
ACA1_053820	267.467	-0.327147	0.191107	-1.71186	0.0869234	0.145591
ACA1_053830	125.136	0.166089	0.170985	0.971369	0.331365	0.436303
ACA1_053840	225.418	-0.346619	0.226003	-1.53369	0.125106	0.19774
ACA1_053850	213.17	-0.706497	0.157281	-4.49194	7.05757e-06	3.93036e-05
ACA1_053860	542.884	0.345888	0.133663	2.58776	0.00966036	0.0225336
ACA1_053870	828.47	0.986185	0.108633	9.07811	1.10477e-19	8.58467e-18
ACA1_053880	1132.17	0.371572	0.152139	2.44231	0.0145934	0.0321706
ACA1_053890	5143.83	-0.0159901	0.10783	-0.14829	0.882114	0.918956
ACA1_053900	0	NA	NA	NA	NA	NA
ACA1_053910	220.907	-0.86587	0.164834	-5.25298	1.49656e-07	1.21816e-06
ACA1_053920	136.094	0.121624	0.140296	0.866906	0.385993	0.492653
ACA1_053930	242.639	-0.698504	0.18655	-3.74433	0.000180879	0.000705353
ACA1_053940	231.637	-0.101839	0.110716	-0.919818	0.357668	0.464085
ACA1_053950	152.515	-0.858609	0.155162	-5.53364	3.13658e-08	2.97162e-07
ACA1_053960	706.182	-0.391309	0.159973	-2.4461	0.0144411	0.0318786
ACA1_053970	83.7914	0.359083	0.273646	1.31221	0.189448	0.278618
ACA1_053980	36.0383	-0.908664	0.353709	-2.56896	0.0102004	0.0236178
ACA1_053990	70.066	0.00842841	0.285016	0.0295717	0.976409	0.988148
ACA1_054000	109.876	0.341216	0.156588	2.17906	0.0293269	0.0584757
ACA1_054010	213.819	-0.7983	0.234415	-3.4055	0.000660438	0.00219862
ACA1_054020	889.139	0.526432	0.141897	3.70995	0.000207297	0.000793176
ACA1_054030	375.977	-0.303572	0.169121	-1.795	0.0726538	0.125398
ACA1_054040	733.814	-0.642721	0.124583	-5.15898	2.48299e-07	1.91943e-06
ACA1_054050	273.202	0.348036	0.192991	1.80338	0.0713291	0.12345
ACA1_054060	54.8909	0.260565	0.292317	0.891376	0.372728	0.479662
ACA1_054070	904.089	0.322724	0.0961158	3.35766	0.000786056	0.00254469
ACA1_054080	22.764	-0.813392	0.441203	-1.84358	0.0652446	0.114435
ACA1_054090	72.9704	0.76079	0.20214	3.76368	0.00016743	0.000661481
ACA1_054100	626.799	0.703377	0.168508	4.17415	2.99095e-05	0.000141962
ACA1_054110	21.0494	-0.161938	0.324039	-0.499747	0.617253	0.708064
ACA1_054120	175.816	0.883336	0.244186	3.61748	0.000297489	0.00109256
ACA1_054130	225.6	0.845305	0.163052	5.18427	2.16867e-07	1.7001e-06
ACA1_054140	1440.65	-0.616377	0.551103	-1.11844	0.263379	0.36383
ACA1_054150	276.621	1.11053	0.173358	6.40603	1.49357e-10	2.303e-09
ACA1_054160	14.0881	-0.882283	0.451837	-1.95266	0.0508604	0.093132
ACA1_054170	206.93	-0.344641	0.14174	-2.4315	0.0150363	0.0330209
ACA1_054180	240.894	-0.329362	0.170166	-1.93554	0.0529241	0.0964003
ACA1_054190	910.231	-0.247743	0.101984	-2.42923	0.0151308	0.0331884
ACA1_054200	26600.7	-0.30136	0.129548	-2.32624	0.0200057	0.0419753
ACA1_054210	226.145	-0.869356	0.144541	-6.01459	1.80343e-09	2.21565e-08
ACA1_054220	742.51	-1.019	0.198849	-5.12451	2.98308e-07	2.26244e-06
ACA1_054230	1199.86	0.223678	0.0769412	2.90713	0.00364757	0.0097161
ACA1_054240	7.28867	0.42641	0.465041	0.916931	0.359179	0.465586
ACA1_054250	160.487	-0.811856	0.336063	-2.41579	0.0157013	0.0341747
ACA1_054260	0.141605	0.0694486	0.169083	0.410737	0.681265	NA
ACA1_054270	52.9874	-1.22852	0.329872	-3.72424	0.000195902	0.000754974
ACA1_054280	52.1433	-0.302695	0.460993	-0.656617	0.511427	0.612238
ACA1_054290	16.0889	-0.447379	0.465905	-0.960237	0.336936	0.442228
ACA1_054300	7.56329	0.842442	0.569775	1.47855	0.13926	0.216325
ACA1_054310	19.2413	0.916418	0.451587	2.02933	0.0424247	0.0801978
ACA1_054320	8390.49	1.42997	0.129771	11.0192	3.08733e-28	7.96532e-26
ACA1_054330	586.623	0.501145	0.153707	3.26039	0.0011126	0.00346068
ACA1_054340	9460.59	-0.415685	0.213166	-1.95005	0.0511697	0.0936178
ACA1_054350	133.243	0.784535	0.26386	2.9733	0.00294614	0.008077
ACA1_054360	735.111	0.523493	0.0815776	6.41712	1.38879e-10	2.16221e-09
ACA1_054370	90.1268	-0.419594	0.189041	-2.21959	0.0264466	0.0535455
ACA1_054380	339.983	0.16759	0.200961	0.833944	0.404313	0.511083
ACA1_054390	38.3863	-1.05891	0.395624	-2.67656	0.00743819	0.0180193
ACA1_054400	0.769433	-0.511419	0.455705	-1.12226	0.261752	0.362137
ACA1_054410	758.626	-0.303206	0.0828034	-3.66176	0.000250488	0.000937335
ACA1_054420	90.4987	0.534443	0.214355	2.49327	0.0126574	0.0284674
ACA1_054430	121.635	0.965715	0.52697	1.83258	0.0668652	0.116774
ACA1_054440	384.984	0.103958	0.084045	1.23693	0.216113	0.310255
ACA1_054450	68.892	0.1003	0.227077	0.441698	0.658707	0.744002
ACA1_054460	4175.56	-1.06467	0.145037	-7.3407	2.12473e-13	5.66384e-12
ACA1_054470	247.813	-0.0192941	0.145054	-0.133013	0.894183	0.928167
ACA1_054480	737.598	-0.263512	0.217727	-1.21029	0.226167	0.321673
ACA1_054490	110.128	-0.275961	0.155872	-1.77044	0.0766542	0.131019
ACA1_054500	976.436	0.507633	0.150297	3.37752	0.000731414	0.00239571
ACA1_054510	775.513	0.571477	0.251434	2.27287	0.0230339	0.0474876
ACA1_054520	35.3643	-0.045521	0.522946	-0.0870473	0.930634	0.955025
ACA1_054530	280.09	0.481819	0.126749	3.80137	0.000143899	0.000579283
ACA1_054540	133.626	0.923231	0.182746	5.052	4.37218e-07	3.218e-06
ACA1_054550	99.7945	-1.11127	0.303585	-3.66047	0.000251749	0.000941383
ACA1_054560	62.9841	-1.3544	0.297211	-4.55703	5.18832e-06	2.99245e-05
ACA1_054570	1472.59	-0.165615	0.0803252	-2.06181	0.0392259	0.0749352
ACA1_054580	41.4694	-0.00115279	0.276538	-0.00416866	0.996674	1
ACA1_054590	173.348	0.732871	0.197091	3.71844	0.000200458	0.000770885
ACA1_054600	2.51304	-0.0372583	0.559921	-0.066542	0.946946	0.966684
ACA1_054610	217.907	-0.150374	0.1247	-1.20589	0.227858	0.323451
ACA1_054620	148.065	-0.269565	0.19962	-1.35039	0.176891	0.263749
ACA1_054630	15.4844	-0.124616	0.371924	-0.335059	0.737581	0.806949
ACA1_054640	256.249	1.75015	0.49414	3.54181	0.000397396	0.00141606
ACA1_054650	70.5428	4.32797	0.461923	9.36946	7.29043e-21	7.02214e-19
ACA1_054660	1.03037	0.0776483	0.487184	0.159382	0.873368	0.912989
ACA1_054670	0.414276	0.0488085	0.193375	0.252404	0.800729	0.856704
ACA1_054680	0.82047	0.259208	0.527545	0.491347	0.623181	0.713674
ACA1_054690	346.39	-0.722465	0.178256	-4.05296	5.05744e-05	0.000227137
ACA1_054700	212.377	0.642214	0.169027	3.79947	0.000145005	0.00058341
ACA1_054710	226.229	0.855589	0.20851	4.10335	4.0721e-05	0.00018712
ACA1_054720	53.2587	-0.377787	0.506294	-0.746182	0.455557	0.560256
ACA1_054730	71.35	-0.533828	0.477353	-1.11831	0.263435	0.363873
ACA1_054740	214.281	-0.135626	0.121168	-1.11932	0.263002	0.363484
ACA1_054750	427.613	-0.00975391	0.0995938	-0.0979369	0.921982	0.949198
ACA1_054760	379.562	1.04445	0.136457	7.65404	1.94756e-14	6.38057e-13
ACA1_054770	3.51567	-0.122323	0.558434	-0.219046	0.826614	0.876673
ACA1_054780	375.407	2.19706	0.23037	9.53709	1.46899e-21	1.53797e-19
ACA1_054790	84.785	-0.480583	0.196525	-2.44541	0.0144688	0.03193
ACA1_054800	55.2141	-0.317334	0.36714	-0.864341	0.387401	0.4941
ACA1_054810	3.16604	-0.915454	0.570376	-1.605	0.108493	0.175829
ACA1_054820	1080.43	0.249773	0.194229	1.28597	0.198454	0.289621
ACA1_054830	108.106	0.559922	0.194246	2.88255	0.00394476	0.010406
ACA1_054840	392.842	-0.277462	0.10922	-2.5404	0.0110727	0.0253773
ACA1_054850	293.979	-1.64419	0.227023	-7.24239	4.40833e-13	1.10576e-11
ACA1_054860	71.708	0.321514	0.269368	1.19358	0.232641	0.328995
ACA1_054870	2.57367	-1.1292	0.574733	-1.96473	0.0494449	0.0910271
ACA1_054880	86.5178	0.944846	0.226152	4.17793	2.94178e-05	0.000140181
ACA1_054890	184.011	0.535503	0.153756	3.4828	0.00049619	0.00172041
ACA1_054900	274.477	0.314142	0.218362	1.43863	0.150255	0.230308
ACA1_054910	96.2309	-0.654081	0.223617	-2.925	0.00344451	0.00925368
ACA1_054920	379.723	-0.701628	0.10003	-7.01419	2.31278e-12	5.03997e-11
ACA1_054930	879.62	1.38133	0.119987	11.5124	1.1429e-30	3.93157e-28
ACA1_054940	880.176	0.610027	0.297124	2.05311	0.0400621	0.0763107
ACA1_054950	286.884	-0.554671	0.182819	-3.03399	0.00241343	0.00678917
ACA1_054960	0.0887971	0	0.165339	0	1	NA
ACA1_054970	194.446	1.15606	0.189729	6.0932	1.10679e-09	1.41763e-08
ACA1_054980	37.2072	0.522715	0.280889	1.86093	0.0627535	0.110677
ACA1_054990	125.915	-0.310469	0.156316	-1.98616	0.0470156	0.0874012
ACA1_055000	18.2307	0.135907	0.360148	0.377364	0.705903	0.781105
ACA1_055010	415.378	0.942496	0.165581	5.69206	1.25514e-08	1.30557e-07
ACA1_055020	7.61188	-0.360785	0.572003	-0.630741	0.52821	0.627597
ACA1_055030	526.294	-0.311089	0.10959	-2.83866	0.00453031	0.0117028
ACA1_055040	292.646	-0.621299	0.219401	-2.8318	0.00462871	0.0119059
ACA1_055050	1788.08	-0.219101	0.124147	-1.76485	0.0775895	0.132304
ACA1_055060	1617.71	-0.110077	0.0925902	-1.18886	0.234496	0.331376
ACA1_055270	960.823	-0.0995555	0.102315	-0.973029	0.330539	0.435414
ACA1_055280	11.4064	-0.170796	0.438797	-0.389237	0.697101	0.774271
ACA1_055290	6.23685	-1.414	0.535152	-2.64225	0.00823575	0.0196353
ACA1_055300	138.951	-0.441801	0.18196	-2.42801	0.0151819	0.0332698
ACA1_055310	724.182	0.70815	0.15248	4.64421	3.41374e-06	2.0508e-05
ACA1_055320	12.5799	-1.16039	0.452082	-2.56678	0.0102648	0.0237213
ACA1_055330	212.275	0.565766	0.197332	2.86708	0.0041428	0.0108492
ACA1_055340	929.614	0.615563	0.166744	3.69167	0.00022279	0.000844627
ACA1_055350	0.0420499	0	0.164818	0	1	NA
ACA1_055360	0	NA	NA	NA	NA	NA
ACA1_055370	0.0375657	0	0.164818	0	1	NA
ACA1_055380	0.375821	-0.195363	0.347873	-0.561591	0.574395	NA
ACA1_055390	69.5926	0.922178	0.331009	2.78596	0.00533702	0.0134901
ACA1_055400	18.2541	0.72619	0.425185	1.70794	0.0876472	0.146617
ACA1_055410	41.5282	-1.16259	0.348615	-3.33488	0.000853374	0.00274044
ACA1_055420	122.489	1.16115	0.219638	5.28668	1.24558e-07	1.03189e-06
ACA1_055430	615.632	0.439167	0.166271	2.64127	0.00825969	0.0196892
ACA1_055440	415.01	0.121814	0.183909	0.662359	0.507741	0.608758
ACA1_055450	442.18	0.285065	0.161801	1.76183	0.0780984	0.132997
ACA1_055460	171.344	0.362698	0.225063	1.61154	0.107061	0.173761
ACA1_055470	158.074	0.140333	0.254357	0.551715	0.581144	0.675159
ACA1_055480	142.155	0.152263	0.157135	0.968995	0.332548	0.437582
ACA1_055490	284.728	0.112028	0.110375	1.01497	0.310119	0.414047
ACA1_055500	4.85507	-0.500403	0.57387	-0.87198	0.383219	0.48995
ACA1_055510	616.973	-0.78749	0.149625	-5.2631	1.41647e-07	1.15907e-06
ACA1_055520	475.227	-0.357351	0.148013	-2.41433	0.0157643	0.034281
ACA1_055530	0.332839	0.113829	0.362326	0.314161	0.753399	NA
ACA1_055540	392.907	-0.57707	0.193968	-2.97508	0.0029291	0.0080364
ACA1_055550	45.3437	-0.117748	0.233415	-0.504461	0.613938	0.705325
ACA1_055560	10.8408	0.691567	0.431135	1.60406	0.108701	0.176086
ACA1_055570	153.679	-0.850688	0.291998	-2.91334	0.00357589	0.00955863
ACA1_055580	162.616	0.0981859	0.132512	0.740962	0.458717	0.56304
ACA1_055590	85.3968	1.06856	0.252234	4.23639	2.27145e-05	0.000111535
ACA1_055600	284.296	-0.372767	0.153838	-2.42311	0.0153883	0.033615
ACA1_055610	27.2399	-1.89023	0.346047	-5.46237	4.69823e-08	4.27368e-07
ACA1_055620	515.854	0.224438	0.130455	1.72043	0.085355	0.143163
ACA1_055630	222.319	-0.0747478	0.159126	-0.469739	0.638542	0.726715
ACA1_055640	982.801	0.615262	0.206769	2.9756	0.00292412	0.0080273
ACA1_055650	590.361	-0.190437	0.0956098	-1.99182	0.0463913	0.086385
ACA1_055660	349.218	0.367098	0.199425	1.84078	0.065654	0.115076
ACA1_055670	6.85509	0.705665	0.510001	1.38365	0.166464	0.250607
ACA1_055680	1.56609	1.11927	0.558001	2.00586	0.0448707	0.0840519
ACA1_055790	14.6973	0.831405	0.373145	2.2281	0.0258738	0.0524962
ACA1_055800	12.9857	0.462354	0.380565	1.21491	0.224399	0.319735
ACA1_055810	0.320912	0	0.172214	0	1	NA
ACA1_055820	199.753	-0.274472	0.161854	-1.6958	0.0899238	0.149783
ACA1_055830	33.8114	-0.547829	0.320082	-1.71152	0.0869845	0.145677
ACA1_055840	163.21	-1.10488	0.245983	-4.49168	7.06644e-06	3.93282e-05
ACA1_055950	450.551	-0.0206633	0.153506	-0.134609	0.892921	0.927323
ACA1_055960	0.954922	-1.16256	0.521086	-2.23104	0.0256786	0.0521586
ACA1_055970	5.66027	0.970173	0.505926	1.91762	0.0551592	0.0997777
ACA1_055980	0.416682	-0.512429	0.442114	-1.15904	0.246439	0.345015
ACA1_055990	0.588871	-0.0780659	0.413356	-0.188859	0.850203	0.895447
ACA1_056090	28.0851	-0.615308	0.297144	-2.07074	0.0383828	0.0735288
ACA1_056300	100.16	-0.614091	0.24625	-2.49377	0.0126396	0.0284405
ACA1_056310	116.045	0.819423	0.173228	4.73031	2.24179e-06	1.39911e-05
ACA1_056320	58.825	0.273885	0.202008	1.35582	0.175157	0.261676
ACA1_056430	135.834	0.506707	0.145581	3.48059	0.00050032	0.00173141
ACA1_056540	19.0079	0.183151	0.466695	0.392443	0.694731	0.772477
ACA1_056550	0.427004	0.168304	0.42284	0.398032	0.690606	0.769583
ACA1_056560	0	NA	NA	NA	NA	NA
ACA1_056670	5.85134	-0.156454	0.575441	-0.271885	0.78571	0.844953
ACA1_056770	0	NA	NA	NA	NA	NA
ACA1_056880	0	NA	NA	NA	NA	NA
ACA1_056890	0	NA	NA	NA	NA	NA
ACA1_056900	0	NA	NA	NA	NA	NA
ACA1_056910	0	NA	NA	NA	NA	NA
ACA1_056920	0	NA	NA	NA	NA	NA
ACA1_056930	0.0171837	0	0.164818	0	1	NA
ACA1_056940	0.0443986	0	0.164818	0	1	NA
ACA1_056950	0	NA	NA	NA	NA	NA
ACA1_056960	0	NA	NA	NA	NA	NA
ACA1_056970	0.25457	0.137095	0.174917	0.783772	0.433174	NA
ACA1_056980	0	NA	NA	NA	NA	NA
ACA1_056990	0	NA	NA	NA	NA	NA
ACA1_057000	0	NA	NA	NA	NA	NA
ACA1_057010	0	NA	NA	NA	NA	NA
ACA1_057020	0	NA	NA	NA	NA	NA
ACA1_057030	0.02155	0	0.164818	0	1	NA
ACA1_057040	4.84212	-0.673672	0.502074	-1.34178	0.179668	0.267227
ACA1_057050	3.99316	-0.535834	0.56772	-0.943835	0.345254	0.450771
ACA1_057060	842.747	-0.43935	0.138415	-3.17415	0.00150273	0.00448307
ACA1_057070	77.5348	-0.426306	0.217852	-1.95687	0.0503632	0.0923549
ACA1_057080	185.271	0.450962	0.168415	2.67769	0.00741317	0.0179737
ACA1_057090	167.232	0.551762	0.183408	3.00838	0.00262643	0.00731008
ACA1_057100	532.852	0.582006	0.125619	4.63312	3.60191e-06	2.15043e-05
ACA1_057110	116.549	-0.618438	0.322954	-1.91494	0.0555	0.100233
ACA1_057120	141.596	-0.844738	0.190819	-4.42691	9.55909e-06	5.16105e-05
ACA1_057130	74.8878	-0.0606922	0.174645	-0.347517	0.728203	0.798875
ACA1_057140	203.151	0.760247	0.167759	4.53179	5.84852e-06	3.32937e-05
ACA1_057150	242.362	0.169835	0.133236	1.27469	0.202418	0.294545
ACA1_057160	88.3658	0.543786	0.19584	2.77668	0.0054917	0.0138206
ACA1_057170	86.4481	-0.792012	0.225335	-3.51482	0.000440059	0.00154884
ACA1_057180	3693.36	-0.45978	0.248247	-1.8521	0.0640108	0.112578
ACA1_057190	354.66	-0.175038	0.335373	-0.521919	0.601727	0.694555
ACA1_057200	177.544	-0.255783	0.205713	-1.2434	0.21372	0.307491
ACA1_057210	53.3785	0.341689	0.288825	1.18303	0.236796	0.333876
ACA1_057220	61.6277	0.640715	0.267281	2.39716	0.0165228	0.0356832
ACA1_057230	218.43	0.808648	0.195451	4.13734	3.51363e-05	0.000163705
ACA1_057240	195.277	1.49414	0.212545	7.02977	2.06877e-12	4.5356e-11
ACA1_057250	1630.12	-0.727523	0.147002	-4.94907	7.45682e-07	5.21326e-06
ACA1_057260	1065.8	0.554814	0.166203	3.33816	0.000843349	0.00271254
ACA1_057270	0.298291	0.152865	0.283424	0.539351	0.589645	NA
ACA1_057280	34.1674	-0.464838	0.290693	-1.59907	0.109806	0.177617
ACA1_057290	32.9783	-1.09803	0.323316	-3.39616	0.000683386	0.00226308
ACA1_057300	350.88	-0.790186	0.188422	-4.19371	2.74429e-05	0.000131595
ACA1_057310	28.0321	0.246058	0.309134	0.795959	0.426056	0.532036
ACA1_057320	91.67	0.267708	0.183654	1.45768	0.144929	0.223319
ACA1_057330	64.5907	0.694977	0.558901	1.24347	0.213695	0.307485
ACA1_057340	33.8944	-0.306033	0.279161	-1.09626	0.272965	0.374245
ACA1_057350	18.0476	-0.223874	0.36465	-0.613942	0.539254	0.637416
ACA1_057360	219.563	-0.0480588	0.157407	-0.305315	0.760126	0.825551
ACA1_057370	188.499	-0.756771	0.226959	-3.3344	0.000854831	0.00274388
ACA1_057380	116.489	0.798833	0.566561	1.40997	0.158549	0.240596
ACA1_057390	214.297	-0.27336	0.169766	-1.61022	0.107351	0.174172
ACA1_057400	257.555	1.59246	0.460851	3.45548	0.000549311	0.0018749
ACA1_057410	41.7312	-1.56168	0.523331	-2.98411	0.00284404	0.00782233
ACA1_057420	597.417	2.52137	0.301217	8.37061	5.73189e-17	2.8755e-15
ACA1_057430	210.273	0.609525	0.132659	4.59468	4.33406e-06	2.54387e-05
ACA1_057440	276.686	0.121505	0.128031	0.949031	0.342605	0.447883
ACA1_057450	90.6748	-1.13947	0.192675	-5.91397	3.3395e-09	3.89734e-08
ACA1_057460	191.831	0.967699	0.364549	2.65451	0.00794234	0.01903
ACA1_057470	19.4965	0.624444	0.39619	1.57612	0.114997	0.184281
ACA1_057480	0.120266	-0.0843027	0.168695	-0.499733	0.617263	NA
ACA1_057490	408.827	-0.170394	0.10386	-1.64061	0.100879	0.165266
ACA1_057500	135.446	-0.68961	0.55884	-1.234	0.217202	0.311416
ACA1_057510	214.76	-0.130843	0.193351	-0.676712	0.498588	0.600651
ACA1_057520	179.873	0.369782	0.163049	2.26792	0.023334	0.0480037
ACA1_057530	775.502	-0.487286	0.103133	-4.72484	2.30298e-06	1.4342e-05
ACA1_057540	1.45428	0.244333	0.536014	0.455834	0.648509	0.73453
ACA1_057550	3.4813	-0.101753	0.573636	-0.177382	0.859208	0.901972
ACA1_057560	0.104072	0	0.16746	0	1	NA
ACA1_057570	0.53194	0.288032	0.467226	0.616472	0.537583	0.635753
ACA1_057780	0	NA	NA	NA	NA	NA
ACA1_057790	792.606	0.162555	0.176932	0.918745	0.358229	0.464729
ACA1_057800	619.332	0.575786	0.214126	2.689	0.00716657	0.0174314
ACA1_057810	165.515	1.36898	0.242775	5.63889	1.71153e-08	1.72804e-07
ACA1_057820	127.147	-0.0636634	0.170499	-0.373395	0.708854	0.78347
ACA1_057830	344.924	-0.237938	0.233557	-1.01876	0.308317	0.412155
ACA1_057840	99.7036	-0.187726	0.187572	-1.00082	0.316913	0.421113
ACA1_057850	76.1985	0.284435	0.248558	1.14434	0.252482	0.35177
ACA1_057860	175.78	-0.549532	0.153521	-3.57952	0.000344226	0.00124771
ACA1_057870	28.9101	-0.862735	0.393639	-2.19169	0.0284018	0.0568744
ACA1_057880	59.1647	2.18205	0.399698	5.45924	4.78166e-08	4.33954e-07
ACA1_057890	0.187043	0.035069	0.171778	0.204153	0.838234	NA
ACA1_057900	0.785617	0.184976	0.478563	0.386523	0.699109	0.775807
ACA1_057910	0.0200982	0	0.164818	0	1	NA
ACA1_057920	0	NA	NA	NA	NA	NA
ACA1_057930	100.594	0.214651	0.199825	1.0742	0.282735	0.384321
ACA1_057940	2331.26	-0.227499	0.130287	-1.74614	0.0807874	0.136917
ACA1_057950	243.217	0.482872	0.207028	2.3324	0.0196796	0.0413874
ACA1_057960	582.075	0.394875	0.208681	1.89224	0.0584588	0.104648
ACA1_057970	455.3	0.435052	0.230765	1.88526	0.0593943	0.105968
ACA1_057980	169.937	0.673453	0.181935	3.70161	0.000214233	0.000817018
ACA1_057990	158.321	0.684581	0.20727	3.30284	0.000957097	0.00303049
ACA1_058000	84.6416	0.911329	0.246221	3.70126	0.000214529	0.000817816
ACA1_058010	268.184	0.546848	0.125619	4.35324	1.34138e-05	6.97131e-05
ACA1_058020	849.969	-0.675962	0.127331	-5.30869	1.10415e-07	9.25334e-07
ACA1_058030	77.049	-0.0222456	0.219899	-0.101163	0.919421	0.947219
ACA1_058040	61.1063	0.974774	0.57333	1.7002	0.0890937	0.148658
ACA1_058050	316.132	1.33821	0.497144	2.69179	0.00710703	0.0173215
ACA1_058060	218.588	-0.563156	0.164981	-3.41345	0.000641449	0.00214579
ACA1_058070	322.84	-1.23743	0.297315	-4.16203	3.15435e-05	0.000148886
ACA1_058080	42.7813	1.08799	0.275743	3.94567	7.95761e-05	0.000341162
ACA1_058090	442.499	0.739471	0.138632	5.33404	9.60517e-08	8.18252e-07
ACA1_058100	163.042	0.324721	0.178525	1.81891	0.0689246	0.119849
ACA1_058110	128.059	0.993917	0.541912	1.83409	0.0666405	0.116508
ACA1_058120	919.059	-0.453393	0.144079	-3.14684	0.00165045	0.00485261
ACA1_058130	107.359	-0.109556	0.19904	-0.550424	0.582029	0.675923
ACA1_058140	257.154	-0.0872374	0.214215	-0.407243	0.683829	0.764644
ACA1_058150	74.7278	-1.39282	0.288565	-4.8267	1.38812e-06	9.06263e-06
ACA1_058160	0.403004	0	0.175783	0	1	1
ACA1_058170	101.646	-0.239703	0.171678	-1.39623	0.162644	0.245804
ACA1_058180	1.06862	-0.13212	0.540553	-0.244417	0.806908	0.861362
ACA1_058190	131.357	-0.0933458	0.160007	-0.583385	0.559634	0.65566
ACA1_058200	149.005	-0.928577	0.177213	-5.2399	1.60665e-07	1.29826e-06
ACA1_058210	165.804	0.428192	0.145922	2.93439	0.00334201	0.00901519
ACA1_058220	167.31	0.488767	0.239285	2.04262	0.0410904	0.0779304
ACA1_058230	102.939	-0.155865	0.430511	-0.362046	0.717318	0.789623
ACA1_058240	281.465	-1.13041	0.416295	-2.7154	0.0066196	0.0162764
ACA1_058250	0.658093	0	0.470497	0	1	1
ACA1_058260	40.4032	-1.69145	0.399858	-4.23012	2.33567e-05	0.000114315
ACA1_058270	88.3233	0.533669	0.233997	2.28067	0.0225679	0.0466469
ACA1_058280	201.098	-0.744846	0.142141	-5.24021	1.60394e-07	1.29679e-06
ACA1_058290	267.775	0.465417	0.133807	3.47826	0.000504674	0.00174355
ACA1_058300	487.963	-0.327372	0.0867966	-3.77172	0.000162128	0.000644055
ACA1_058310	935.111	-0.689743	0.300328	-2.29663	0.0216397	0.0449533
ACA1_058320	61.4273	-2.91518	0.449416	-6.4866	8.77946e-11	1.42504e-09
ACA1_058330	28.0343	-0.33432	0.291737	-1.14596	0.25181	0.350969
ACA1_058340	383.592	0.766234	0.100775	7.60343	2.88378e-14	9.11704e-13
ACA1_058350	947.05	0.183828	0.106492	1.72621	0.0843093	0.141673
ACA1_058360	0.232373	-0.0124658	0.268305	-0.0464611	0.962943	NA
ACA1_058370	225.701	-0.328419	0.26205	-1.25327	0.210108	0.303291
ACA1_058380	1.60457	-0.699875	0.538601	-1.29943	0.193796	0.283743
ACA1_058390	188.698	-0.784084	0.246733	-3.17787	0.00148364	0.00443342
ACA1_058400	0.0467759	0	0.1654	0	1	NA
ACA1_058410	75.278	-1.5394	0.244127	-6.30576	2.86791e-10	4.15817e-09
ACA1_058420	113.059	-0.0254126	0.183272	-0.138661	0.889718	0.924928
ACA1_058430	3.81396	-1.43147	0.574113	-2.49335	0.0126544	0.028465
ACA1_058440	58.8429	-0.20065	0.252002	-0.796225	0.425901	0.531889
ACA1_058450	715.371	-0.216658	0.132158	-1.63939	0.101132	0.165589
ACA1_058460	2.81992	-0.632012	0.57651	-1.09627	0.272959	0.374245
ACA1_058470	0	NA	NA	NA	NA	NA
ACA1_058480	0	NA	NA	NA	NA	NA
ACA1_058490	0	NA	NA	NA	NA	NA
ACA1_058500	51.5977	1.02719	0.388997	2.6406	0.00827596	0.0197149
ACA1_058510	115.234	0.691054	0.181982	3.79738	0.000146232	0.000587529
ACA1_058520	747.224	1.67326	0.230769	7.25078	4.14376e-13	1.05033e-11
ACA1_058530	451.458	0.0450519	0.114263	0.394283	0.693372	0.771672
ACA1_058540	249.546	-1.61465	0.369443	-4.37051	1.23959e-05	6.50078e-05
ACA1_058550	192.606	-1.42106	0.254825	-5.5766	2.45264e-08	2.39755e-07
ACA1_058560	305.714	-0.436249	0.125325	-3.48094	0.000499655	0.00172994
ACA1_058570	127.762	-0.292426	0.194692	-1.50199	0.1331	0.208232
ACA1_058580	17.0113	0.206277	0.433258	0.476107	0.633998	0.722968
ACA1_058590	785.25	-0.0735313	0.10466	-0.702574	0.482321	0.585201
ACA1_058700	187.692	-0.081484	0.213186	-0.382221	0.702298	0.778356
ACA1_058710	6353.97	0.328935	0.123652	2.66017	0.00781023	0.0187664
ACA1_058720	381.28	-0.395232	0.122577	-3.22436	0.00126254	0.00386058
ACA1_058730	361.657	1.0884	0.210678	5.16618	2.38926e-07	1.85691e-06
ACA1_058740	9375.51	-0.768136	0.202634	-3.79077	0.000150184	0.000602069
ACA1_058750	142.269	-0.179315	0.165767	-1.08173	0.279372	0.380646
ACA1_058760	2710.22	-2.41392	0.279423	-8.63895	5.67342e-18	3.31861e-16
ACA1_058770	6720.17	-0.641319	0.114741	-5.58929	2.27997e-08	2.24241e-07
ACA1_058780	208.569	0.320555	0.135855	2.35954	0.0182978	0.0388603
ACA1_058790	5429.9	0.182608	0.0925762	1.97252	0.0485507	0.0897238
ACA1_058800	642.801	-0.401913	0.121175	-3.31679	0.000910581	0.00290229
ACA1_058810	4525.94	-0.707315	0.158698	-4.45698	8.3122e-06	4.54388e-05
ACA1_058820	542.544	-0.0762918	0.131344	-0.580855	0.561338	0.657336
ACA1_058830	319.378	-0.147763	0.165072	-0.895145	0.37071	0.477235
ACA1_058840	1565.43	1.16774	0.379785	3.07473	0.00210692	0.00602669
ACA1_058850	5242.96	0.312178	0.227584	1.37171	0.170154	0.255031
ACA1_058860	448.905	-0.231851	0.149067	-1.55535	0.119864	0.190663
ACA1_058870	7.14124	0.472434	0.488628	0.966858	0.333615	0.438667
ACA1_058880	4.91648	-0.0208546	0.551267	-0.0378303	0.969823	0.983989
ACA1_058890	1032.21	0.779847	0.125468	6.21552	5.11548e-10	7.02551e-09
ACA1_058900	81.7204	-0.360315	0.281124	-1.28169	0.19995	0.291541
ACA1_058910	101.431	0.130118	0.171013	0.760865	0.446738	0.552466
ACA1_058920	3.89879	0.850602	0.57189	1.48735	0.136922	0.213472
ACA1_058930	21.683	-0.770183	0.357691	-2.15321	0.0313024	0.0618513
ACA1_058940	131.135	0.858497	0.182473	4.70479	2.54126e-06	1.56973e-05
ACA1_059050	6.72135	-0.588611	0.505313	-1.16484	0.244082	0.342506
ACA1_059160	0	NA	NA	NA	NA	NA
ACA1_059170	0.0408599	0	0.164818	0	1	NA
ACA1_059280	0	NA	NA	NA	NA	NA
ACA1_059290	30.645	-0.834889	0.358579	-2.32833	0.0198948	0.0417912
ACA1_059300	152.663	-0.823452	0.17836	-4.6168	3.89706e-06	2.30782e-05
ACA1_059310	3.50163	0.0989039	0.568909	0.173848	0.861985	0.903705
ACA1_059420	0.996004	-1.02773	0.548311	-1.87436	0.0608812	0.108074
ACA1_059430	83.1625	-1.04018	0.332668	-3.12678	0.00176733	0.00515171
ACA1_059440	145.229	1.49676	0.252982	5.91648	3.28914e-09	3.84167e-08
ACA1_059450	187.129	0.724996	0.225669	3.21265	0.00131514	0.00398849
ACA1_059460	7736.42	-0.448581	0.122802	-3.65288	0.00025932	0.00096588
ACA1_059470	120.6	0.884613	0.157633	5.61187	2.00153e-08	1.9875e-07
ACA1_059480	45.1437	-2.51771	0.528538	-4.76353	1.9024e-06	1.2087e-05
ACA1_059490	2652.55	0.256042	0.097855	2.61654	0.0088825	0.020956
ACA1_059500	238.389	0.2105	0.251455	0.837129	0.40252	0.509158
ACA1_059510	270.924	-0.794672	0.216167	-3.6762	0.000236734	0.000891408
ACA1_059520	37.352	-0.258669	0.413904	-0.62495	0.532004	0.630963
ACA1_059530	306.026	0.7411	0.161061	4.60137	4.19713e-06	2.47007e-05
ACA1_059540	885.884	-0.236013	0.0796411	-2.96346	0.00304206	0.00829808
ACA1_059550	81.5342	-0.459046	0.199757	-2.29802	0.0215604	0.0448144
ACA1_059560	0	NA	NA	NA	NA	NA
ACA1_059570	53.8825	-0.683374	0.283182	-2.41319	0.0158134	0.0343619
ACA1_059580	156.931	-0.455167	0.206126	-2.20819	0.0272308	0.0549024
ACA1_059590	172.753	-0.0747752	0.190023	-0.393506	0.693945	0.771953
ACA1_059600	1969.46	-1.05993	0.153715	-6.8954	5.37136e-12	1.10707e-10
ACA1_059610	596.491	-0.762571	0.207325	-3.67815	0.000234936	0.000886023
ACA1_059620	153.832	1.53365	0.253583	6.0479	1.46748e-09	1.82935e-08
ACA1_059730	77.3518	-0.299223	0.197909	-1.51192	0.130554	0.205049
ACA1_059740	1965.92	-0.130027	0.100796	-1.29	0.197049	0.287892
ACA1_059750	17.5544	0.171757	0.360138	0.476919	0.63342	0.722537
ACA1_059760	147.87	-0.186574	0.192707	-0.968176	0.332957	0.438
ACA1_059770	116.884	-0.836497	0.21963	-3.80867	0.000139718	0.00056529
ACA1_059780	0.159479	0.0681342	0.17041	0.399824	0.689286	NA
ACA1_059790	3.26041	0.105948	0.568156	0.186478	0.85207	0.89689
ACA1_059800	68.2367	1.36553	0.221276	6.17114	6.7798e-10	9.07827e-09
ACA1_059810	28.3588	-0.0238857	0.395132	-0.0604499	0.951797	0.970197
ACA1_059820	448.854	-0.971668	0.157017	-6.18831	6.08123e-10	8.24218e-09
ACA1_059830	169.095	-0.468727	0.216361	-2.16641	0.0302799	0.0600444
ACA1_059840	575.846	-0.694791	0.163979	-4.23707	2.26459e-05	0.000111288
ACA1_059850	451.87	0.89038	0.155541	5.72441	1.03792e-08	1.09941e-07
ACA1_059860	458.477	0.327285	0.0841733	3.88822	0.00010098	0.00042252
ACA1_059870	176.162	-0.883135	0.212034	-4.16507	3.11255e-05	0.000147154
ACA1_059980	278.831	0.188789	0.196975	0.958441	0.33784	0.443295
ACA1_059990	126.106	0.0593577	0.194536	0.305124	0.760272	0.825631
ACA1_060000	151.094	-0.124685	0.243202	-0.512681	0.608174	0.700207
ACA1_060010	453.628	0.879329	0.193382	4.54711	5.43866e-06	3.12561e-05
ACA1_060020	148.519	0.998069	0.224073	4.45422	8.41994e-06	4.59756e-05
ACA1_060030	133.041	-0.425726	0.175556	-2.42501	0.0153079	0.03348
ACA1_060040	31.6659	-0.671321	0.373228	-1.79869	0.0720679	0.124565
ACA1_060050	0.256585	0	0.327665	0	1	NA
ACA1_060060	0	NA	NA	NA	NA	NA
ACA1_060070	0	NA	NA	NA	NA	NA
ACA1_060080	0.0420499	0	0.164818	0	1	NA
[truncated: 13,656 more rows]

## Sheet: WTvsDotA.3hr.results
	baseMean	log2FoldChange	lfcSE	stat	pvalue	padj
ACA1_000210	474.682	-0.255559	0.201016	-1.27134	0.203609	0.620961
ACA1_000220	109.069	0.285779	0.186604	1.53147	0.125653	0.519833
ACA1_000330	344.708	0.047586	0.114799	0.414517	0.678495	0.897568
ACA1_000530	312.525	-0.2436	0.171126	-1.42351	0.154588	0.562298
ACA1_000540	312.325	-0.381144	0.144456	-2.63847	0.0083281	0.130277
ACA1_000550	1839.42	0.819312	0.291302	2.81259	0.00491445	0.092029
ACA1_000560	8.36131	1.53276	0.540683	2.83486	0.00458458	0.087708
ACA1_000570	130.502	-0.0532178	0.154886	-0.343592	0.731153	0.918598
ACA1_000580	316.421	-0.230194	0.198146	-1.16174	0.245343	0.668332
ACA1_000590	267.555	-0.535235	0.396683	-1.34927	0.177249	0.591506
ACA1_000790	185.929	0.474423	0.186834	2.53928	0.0111082	0.156944
ACA1_000800	1.81038	-1.58016	0.567368	-2.78507	0.00535169	0.0971393
ACA1_000810	26.9131	0.539244	0.306505	1.75933	0.0785215	0.43491
ACA1_000820	746.246	-0.0357769	0.127761	-0.280029	0.779455	0.935386
ACA1_000830	14.2343	-0.582987	0.544212	-1.07125	0.284058	0.703043
ACA1_000840	992.591	-0.133872	0.0891961	-1.50088	0.133387	0.529946
ACA1_001040	5.39668	-0.0049632	0.53822	-0.00922152	0.992642	1
ACA1_001250	192.787	-0.17238	0.237489	-0.725845	0.467934	0.806868
ACA1_001260	236.26	0.0222349	0.126231	0.176145	0.86018	0.966579
ACA1_001270	25.7717	1.92534	0.495373	3.88665	0.000101635	0.0046117
ACA1_001280	57.8928	0.791234	0.214525	3.68832	0.000225743	0.00866003
ACA1_001290	249.042	0.168591	0.22278	0.756759	0.449194	0.797839
ACA1_001300	181.633	0.116375	0.172269	0.675542	0.499332	0.822555
ACA1_001310	32.2655	-0.0955714	0.269582	-0.354517	0.722951	0.915426
ACA1_001510	43.8373	0.166353	0.250776	0.663356	0.507103	0.826358
ACA1_001520	465.003	-0.114194	0.140501	-0.812761	0.416355	0.781946
ACA1_001530	559.875	0.645594	0.129179	4.99769	5.80225e-07	6.03988e-05
ACA1_001540	141.604	0.470023	0.214195	2.19437	0.0282089	0.263948
ACA1_001550	8.78529	0.0920426	0.4555	0.20207	0.839862	0.961055
ACA1_001660	894.437	0.0623417	0.332525	0.187479	0.851285	0.963831
ACA1_001860	50.3718	-0.454838	0.242646	-1.87449	0.0608622	0.385197
ACA1_001870	365.637	-0.307034	0.140549	-2.18453	0.0289231	0.267799
ACA1_001980	60.8432	-0.27212	0.37213	-0.731249	0.464627	0.805775
ACA1_001990	28.7859	-0.159408	0.320165	-0.497895	0.618558	0.878039
ACA1_002090	1.27712	1.08923	0.563911	1.93156	0.0534142	0.361811
ACA1_002200	51.8478	-0.180973	0.240048	-0.753903	0.450907	0.798896
ACA1_002300	5711.62	0.0800166	0.202814	0.394533	0.693188	0.90297
ACA1_002310	0.366621	0	0.375999	0	1	NA
ACA1_002320	564.145	0.226264	0.171817	1.31689	0.187876	0.604436
ACA1_002330	331.525	-0.000853674	0.12991	-0.00657126	0.994757	1
ACA1_002430	383.813	0.565204	0.25339	2.23057	0.0257096	0.252058
ACA1_002440	16.5323	0.840152	0.410322	2.04754	0.0406049	0.317944
ACA1_002450	35.144	-0.0795198	0.340982	-0.233208	0.8156	0.949669
ACA1_002460	23.6142	0.0465365	0.341076	0.136441	0.891473	0.973476
ACA1_002470	18.7867	-0.168492	0.346337	-0.486498	0.626614	0.880976
ACA1_002480	16.0921	0.109733	0.473622	0.231688	0.81678	0.95037
ACA1_002490	334.898	-0.133751	0.140741	-0.950329	0.341945	0.742931
ACA1_002500	2532.22	-0.0516926	0.118062	-0.437844	0.6615	0.892928
ACA1_002510	2779.56	0.519336	0.170231	3.05078	0.00228249	0.0516185
ACA1_002610	502.497	0.7176	0.300093	2.39126	0.0167909	0.197105
ACA1_002620	392.14	-0.113182	0.0902534	-1.25405	0.209824	0.627964
ACA1_002630	82.8779	-0.399756	0.25543	-1.56503	0.117576	0.509384
ACA1_002730	0	NA	NA	NA	NA	NA
ACA1_002740	403.144	-0.315759	0.537111	-0.587884	0.55661	0.850413
ACA1_002750	183.995	0.0243685	0.167535	0.145453	0.884353	0.970854
ACA1_002760	83.4765	0.0735258	0.20686	0.355438	0.722262	0.915187
ACA1_002770	495.519	-0.15805	0.219954	-0.718559	0.472413	0.809594
ACA1_002780	64.5575	0.0528636	0.240092	0.22018	0.825731	0.955222
ACA1_002790	78.6123	-0.17975	0.233054	-0.771278	0.440542	0.793872
ACA1_002890	0.0360616	0.0968144	0.164818	0.587402	0.556934	NA
ACA1_003000	1.17976	-0.415424	0.521117	-0.797179	0.425347	0.785285
ACA1_003110	258.596	0.335261	0.329403	1.01778	0.308781	0.718628
ACA1_003220	129.484	0.18383	0.333939	0.550491	0.581982	0.863459
ACA1_003530	5.11122	0.00501659	0.480983	0.0104299	0.991678	1
ACA1_003640	3.96802	1.10715	0.522036	2.12084	0.0339353	0.290461
ACA1_003650	459.079	-0.187179	0.188764	-0.991604	0.321391	0.729373
ACA1_003850	26.4101	0.286933	0.357016	0.803698	0.421571	0.784449
ACA1_003860	17.4729	0.497943	0.397728	1.25197	0.21058	0.628677
ACA1_003870	80.4446	-0.282188	0.445487	-0.633437	0.526449	0.835999
ACA1_004080	59.1242	0.000338351	0.465174	0.000727364	0.99942	1
ACA1_004190	126.271	0.0132725	0.154822	0.0857274	0.931683	0.982923
ACA1_004200	142.603	-0.284921	0.144365	-1.97362	0.0484251	0.343133
ACA1_004400	76.0031	0.181029	0.251802	0.718936	0.47218	0.809477
[truncated: 15,582 more rows]
